# Supplementary material for: Simple accessible clemastine fumarate analogues as effective antileishmanials
Source: Royal Society of Chemistry journal article supplement (doi:10.1039/d4md01004c), 2025-01-01

### Simple Accessible Clemastine Fumarate Analogues as Effective Antileishmanials

Rebecca L. Charlton,<sup>1,2</sup> Douglas O. Escrivani,<sup>1,2</sup> Christopher Brown,<sup>1</sup> Niranjana Thota,<sup>1</sup> Victor S. Agostino,<sup>1</sup> Exequiel O. J. Porta,<sup>1</sup> Timur Avkiran,<sup>3</sup> Andy Merritt,<sup>3</sup> Paul W. Denny,<sup>4</sup> Bartira Rossi-Bergmann,<sup>2</sup> Patrick G. Steel\*<sup>1</sup>

<sup>1</sup> Department of Chemistry, Durham University, Lower Mountjoy, South Rd, Durham DH1 3LE, UK

<sup>2</sup> Institute of Biophysics, Carlos Chagas Filho, Universidade Federal do Rio de Janeiro, 21941-902 Rio de Janeiro – RJ, Brazil

<sup>3</sup> LifeArc, Accelerator Building, Open Innovation Campus, Stevenage, SG1 2FX, UK

<sup>4</sup> Department of Biosciences, Durham University, Lower Mountjoy, South Rd, Durham DH1 3LE, UK

### Supporting Information

|                                                                                                                                |    |
|--------------------------------------------------------------------------------------------------------------------------------|----|
| 1. Supplementary Table S1: Assay data for compounds prepared in this study                                                     | 2  |
| 2. Supplementary Figure S1. Lewis acid screen for biarylcarbinol ether formation                                               | 13 |
| 3. Supplementary Figure S2: Relative selectivity of Clemastine fumarate <b>1a</b> and analogues <b>(R,R)-35</b> and <b>38l</b> | 14 |
| 4. Experimental Procedures                                                                                                     | 15 |
| 4.1. Synthetic Chemistry Protocols                                                                                             | 15 |
| 4.2. Biological Methods                                                                                                        | 76 |
| 5. References                                                                                                                  | 81 |
| 6. <sup>1</sup> H and <sup>13</sup> C NMR Spectra for Compounds assayed in this Study                                          | 82 |

Supplementary Table S1: Assay data for compounds prepared in this study

| N°              | Structure                                                                                                | <i>Lmj</i> PCS inhibition % at 20 $\mu$ M $\pm$ SD | <i>Lmj</i> PCS IC <sub>50</sub> ( $\mu$ M) | <i>L. major</i> promastigote EC <sub>50</sub> ( $\mu$ M) | <i>L. amaz promastigote</i> EC <sub>50</sub> ( $\mu$ M) | BMDM CC <sub>50</sub> ( $\mu$ M) |
|-----------------|----------------------------------------------------------------------------------------------------------|----------------------------------------------------|--------------------------------------------|----------------------------------------------------------|---------------------------------------------------------|----------------------------------|
| 1a <sup>a</sup> | 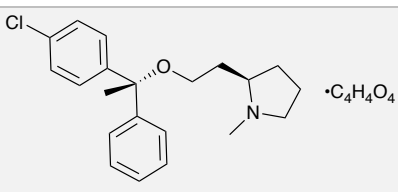<br>Clemastine Fumarate | 82.6 $\pm$ 9.3                                     | 2.87                                       | 0.179                                                    | 0.027                                                   | 19.13                            |
| 7               |                         | 78.1 $\pm$ 12.5                                    | 6.26                                       | 4.10                                                     | –                                                       | –                                |
| 9               |                        | 81.2 $\pm$ 10.6                                    | 4.45                                       | 1.69                                                     | –                                                       | –                                |
| 10              |                       | 78.1 $\pm$ 9.7                                     | 4.13                                       | 0.78                                                     | –                                                       | –                                |
| 14a             |                       | 60.6 $\pm$ 9.2                                     | 14.52                                      | >33                                                      | –                                                       | –                                |
| 14b             |                       | 71.0 $\pm$ 9.7                                     | 8.49                                       | >33                                                      | –                                                       | –                                |
| 19              |                       | 81.2 $\pm$ 1.3                                     | 6.90                                       | >33                                                      | –                                                       | –                                |

|    |                                                                                     |            |      |      |      |   |
|----|-------------------------------------------------------------------------------------|------------|------|------|------|---|
| 21 | 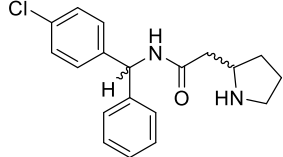   | 82.7       | 6.95 | >33  | -    | - |
| 22 |    | 2.9 ± 1.4  | -    | -    | -    | - |
| 23 |    | -5.4 ± 2.3 | -    | -    | -    | - |
| 24 |    | 90.2 ± 2.4 | 2.41 | >10  | -    | - |
| 27 |   | -          | 4.72 | >5   | -    | - |
| 28 |  | -          | -    | 8.44 | 1.17 | - |
| 29 |  | -          | 3.21 | 1.36 | -    | - |
| 30 |  | -          | -    | 6.83 | 0.50 | - |

|            |                                                                                     |   |   |       |       |   |
|------------|-------------------------------------------------------------------------------------|---|---|-------|-------|---|
| <b>31</b>  | 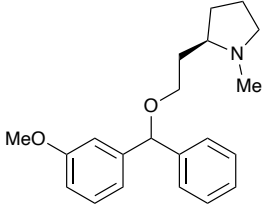   | - | - | 8.44  | 0.63  | - |
| <b>32</b>  |    | - | - | 2.25  | 1.62  | - |
| <b>33</b>  |    | - | - | 2.87  | 2.74  | - |
| <b>35</b>  |   | - | - | 0.13  | 0.101 | - |
| <b>37</b>  |  | - | - | 1.33  | 1.40  | - |
| <b>38a</b> |  | - | - | 2.05  | 3.40  | - |
| <b>38b</b> |  | - | - | 2.65  | 4.10  | - |
| <b>38c</b> |  | - | - | 23.83 | 17.39 | - |



|            |                                                                                     |   |   |       |       |    |
|------------|-------------------------------------------------------------------------------------|---|---|-------|-------|----|
| <b>38d</b> | 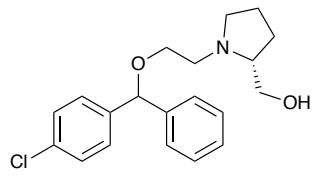   | - | - | 5.88  | 3.20  | -  |
| <b>38e</b> |    | - | - | 14.41 | 12.35 | -  |
| <b>38f</b> |    | - | - | -     | 3.27  | 57 |
| <b>38g</b> |    | - | - | 1.21  | -     | -  |
| <b>38h</b> |   | - | - | 0.09  | -     | -  |
| <b>38i</b> |  | - | - | 7.05  | -     | -  |
| <b>38j</b> |  | - | - | 11.5  | -     | -  |
| <b>38k</b> |  | - | - | 1.7   | 3.2   | -  |

|            |                                                                                     |                |      |       |       |    |
|------------|-------------------------------------------------------------------------------------|----------------|------|-------|-------|----|
| <b>38l</b> | 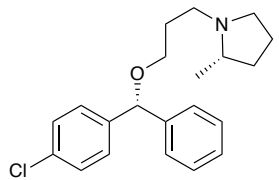   | -              | -    | 0.030 | 0.041 | 73 |
| <b>38m</b> |    | -              | -    | 0.031 | 0.042 | -  |
| <b>38n</b> |    | -              | -    | 0.027 | 0.017 | -  |
| <b>38o</b> |    | -              | -    | 0.08  | 0.10  | -  |
| <b>S1</b>  |   | $4.7 \pm 2.5$  | -    | -     | -     | -  |
| <b>S2</b>  |  | $8.6 \pm 2.1$  | -    | -     | -     | -  |
| <b>S3</b>  |  | $89.2 \pm 2.6$ | 5.40 | -     | -     | -  |
| <b>S4</b>  |  | $90.2 \pm 1.7$ | 4.37 | -     | -     | -  |
| <b>S5</b>  |  | $89.6 \pm 2.2$ | 6.11 | -     | -     | -  |

|            |                                                                                     |                |       |   |   |   |
|------------|-------------------------------------------------------------------------------------|----------------|-------|---|---|---|
| <b>S6</b>  | 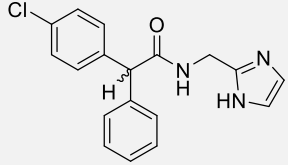   | $53.4 \pm 8.5$ | 23.89 | - | - | - |
| <b>S7</b>  |    | $79.4 \pm 9.0$ | 36.21 | - | - | - |
| <b>S8</b>  |    | $28.3 \pm 5.3$ | -     | - | - | - |
| <b>S9</b>  |    | $2.5 \pm 7.8$  | -     | - | - | - |
| <b>S10</b> |   | $0.6 \pm 1.8$  | -     | - | - | - |
| <b>S11</b> |  | $2.7 \pm 1.7$  | -     | - | - | - |
| <b>S12</b> |  | $86.0 \pm 2.7$ | 13.09 | - | - | - |
| <b>S13</b> |  | $77.9 \pm 5.1$ | 11.38 | - | - | - |
| <b>S14</b> |  | $76.1 \pm 8.5$ | 20.49 | - | - | - |

|            |                                                                                     |                |       |   |   |   |
|------------|-------------------------------------------------------------------------------------|----------------|-------|---|---|---|
| <b>S15</b> | 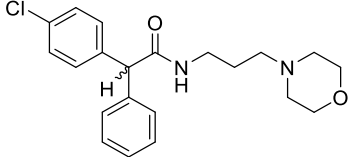   | $35.8 \pm 3.9$ | -     | - | - | - |
| <b>S16</b> |    | $16.3 \pm 3.8$ | -     | - | - | - |
| <b>S17</b> |    | $-0.3 \pm 0.8$ | -     | - | - | - |
| <b>S18</b> |    | $44.4 \pm 4.9$ | 24.86 | - | - | - |
| <b>S19</b> |   | $89.4 \pm 4.1$ | 18.94 | - | - | - |
| <b>S20</b> |  | $11.3 \pm 7.4$ | -     | - | - | - |
| <b>S21</b> |  | $-1.1 \pm 2.5$ | -     | - | - | - |
| <b>S22</b> |  | $1.7 \pm 3.4$  | -     | - | - | - |
| <b>S23</b> |  | $81.9 \pm 2.8$ | 12.67 | - | - | - |
| <b>S24</b> |  | $46.4 \pm 5.8$ | 28.31 | - | - | - |

|     |  |                 |       |   |   |   |
|-----|--|-----------------|-------|---|---|---|
| S25 |  | $24.7 \pm 7.5$  | -     | - | - | - |
| S26 |  | $7.3 \pm 1.9$   | -     | - | - | - |
| S27 |  | $57.2 \pm 10.9$ | 16.51 | - | - | - |
| S28 |  | $7.5 \pm 7.3$   | -     | - | - | - |
| S29 |  | $2.4 \pm 1.7$   | -     | - | - | - |
| S30 |  | $7.3 \pm 6.5$   | -     | - | - | - |
| S31 |  | $24.4 \pm 3.3$  | -     | - | - | - |
| S32 |  | $0.5 \pm 2.1$   | -     | - | - | - |
| S33 |  | $12.0 \pm 3.1$  | -     | - | - | - |
| S34 |  | $27.5 \pm 8.3$  | -     | - | - | - |

|            |                                                                                     |                |   |   |   |   |
|------------|-------------------------------------------------------------------------------------|----------------|---|---|---|---|
| <b>S35</b> | 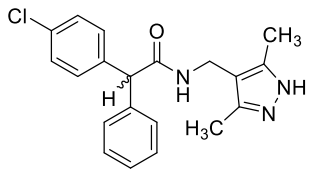   | $4.3 \pm 1.8$  | - | - | - | - |
| <b>S36</b> |    | $4.3 \pm 3.1$  | - | - | - | - |
| <b>S37</b> |    | $9.0 \pm 2.1$  | - | - | - | - |
| <b>S38</b> |    | $3.5 \pm 3.1$  | - | - | - | - |
| <b>S39</b> |   | $-1.7 \pm 5.3$ | - | - | - | - |
| <b>S40</b> |  | $16.0 \pm 0.6$ | - | - | - | - |
| <b>S41</b> |  | $9.3 \pm 1.8$  | - | - | - | - |
| <b>S42</b> |  | $8.5 \pm 1.2$  | - | - | - | - |
| <b>S43</b> |  | $-3.2 \pm 1.7$ | - | - | - | - |

|     |                                                                                     |                 |       |   |   |   |
|-----|-------------------------------------------------------------------------------------|-----------------|-------|---|---|---|
| S44 | 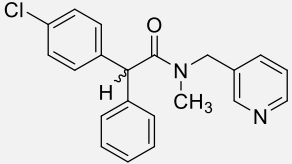   | $8.0 \pm 1.2$   | -     | - | - | - |
| S45 |    | $5.1 \pm 1.5$   | -     | - | - | - |
| S46 |    | $5.5 \pm 3.2$   | -     | - | - | - |
| S47 |    | $59.8 \pm 29.9$ | 17.07 | - | - | - |
| S48 |   | $0.4 \pm 5.3$   | -     | - | - | - |
| S49 |  | $26.5 \pm 12.1$ | -     | - | - | - |
| S50 |  | $-1.8 \pm 6.4$  | -     | - | - | - |
| S51 |  | $-1.5 \pm 4.2$  | -     | - | - | - |
| S52 |  | $-1.1 \pm 8.2$  | -     | - | - | - |
| S53 |  | $0.9 \pm 5.3$   | -     | - | - | - |

|     |                                                                                   |                 |   |   |   |   |
|-----|-----------------------------------------------------------------------------------|-----------------|---|---|---|---|
| S54 | 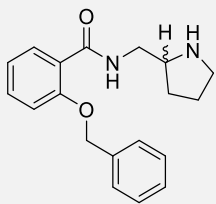 | $40.6 \pm 15.7$ | - | - | - | - |
| S55 |  | $-2.1 \pm 2.7$  | - | - | - | - |
| S56 |  | $-1.3 \pm 3.7$  | - | - | - | - |
| S57 |  | $-4.9 \pm 3.6$  | - | - | - | - |
| S58 |  | $-0.7 \pm 2.4$  | - | - | - | - |

a. data from Mina *et al.*<sup>1</sup>; – Value not determined



### Figure S1. Lewis acid screen for biarylcarbinol ether formation

Following General procedure C, eight Lewis acids were assessed using benzhydrol and 3-phenyl-1-propanol as model substrates (Scheme). The yields were estimated using integrals from GC-MS analysis with dodecane as the standard. The standardised data (arbitrarily setting the output for  $\text{CuCl}_2$  to equal 1) is shown in the chart below.

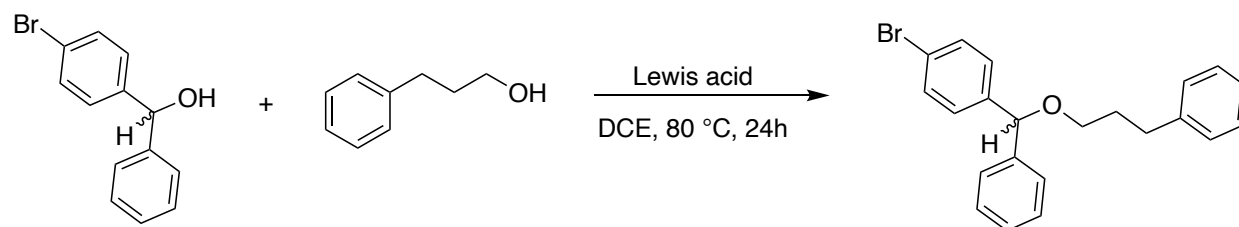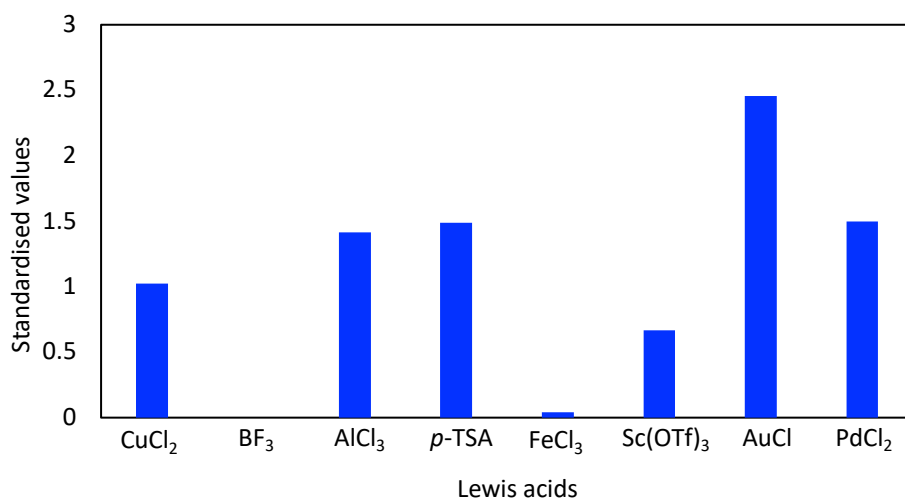

**Supplementary Figure S2:** Relative selectivity of Clemastine fumarate **CF 1a**, and analogues **(RR)-35** and **38I** against a panel of neurotransmitter receptors as determined by radioligand displacement .

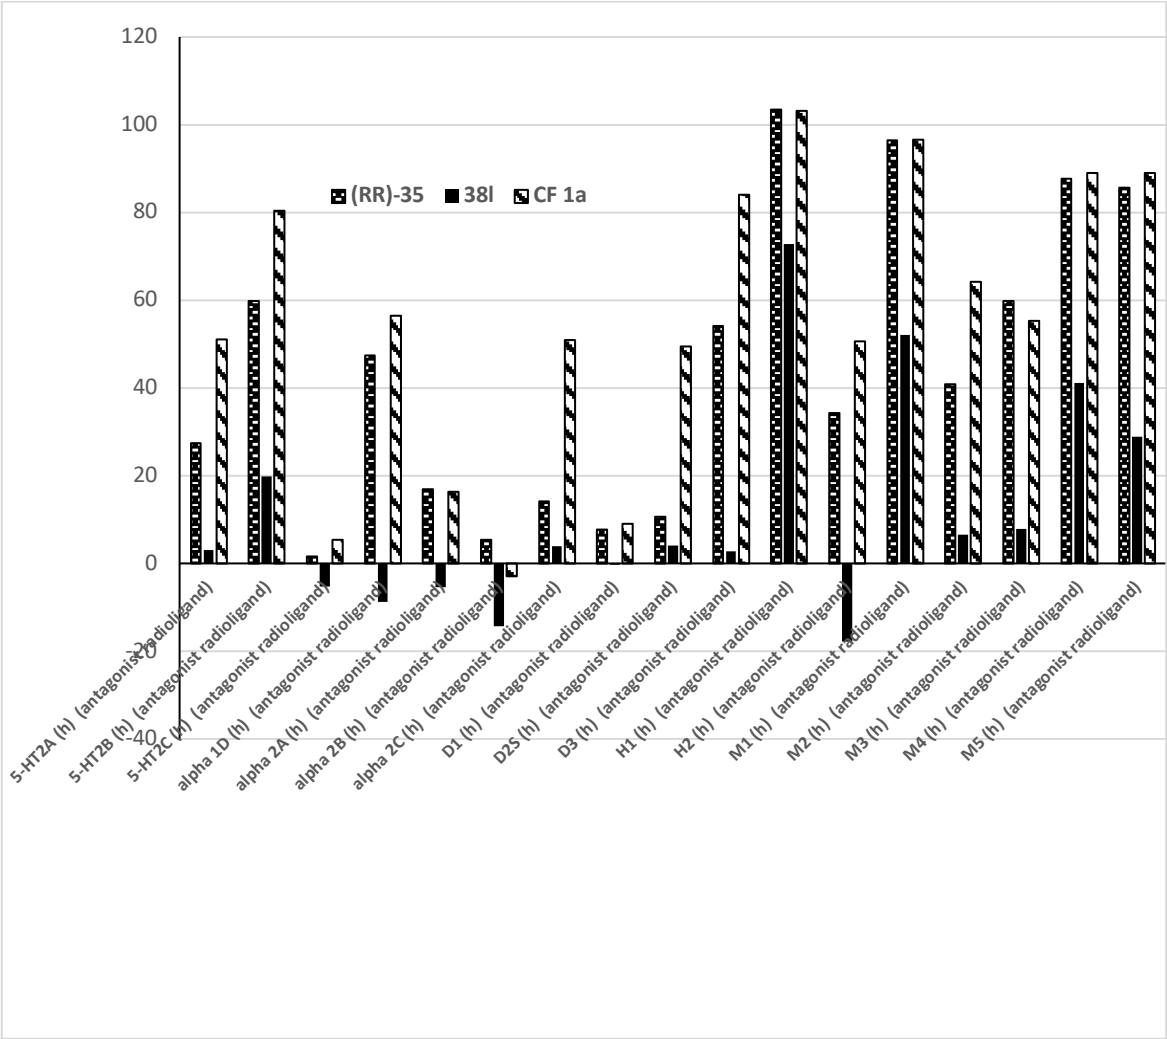

## 4 Experimental Procedures

### 4.1 Chemical Synthesis

#### 4.1.1 General experimental details

**SOLVENTS AND REAGENTS:** All analytical grade solvents and commercially available reagents were used as received from their respective suppliers or dried as required, using standard procedures. All reactions were performed under an inert atmosphere of argon unless otherwise stated.

**CHARACTERISATION:** Reactions were monitored by LC-MS, GC-MS or by TLC using aluminium backed plates. Methods to visualise the spots included ultra-violet light (254 nm) and colour reagents. The visualising stains used were potassium permanganate, phosphomolybdic acid or ninhydrin. Column chromatography was performed using a Teledyne Isco CombiFlash® System with RediSep® Rf normal-phase and C-18 reversed-phase columns. Both carbon and hydrogen NMR spectra were acquired at 295 K on Varian VNMRS 700 (<sup>1</sup>H at 700 MHz, <sup>13</sup>C at 176 MHz), Varian VNMRS 600 (<sup>1</sup>H at 600 MHz, <sup>13</sup>C at 151 MHz), in CDCl<sub>3</sub> unless otherwise stated. 2D COSY, HSQC, HMBC and NOESY were run to aid assignment of peaks. Chemical shifts are reported in parts per million, ppm, to 2 decimal places; with the multiplicity of the signal reported as s, singlet; d, doublet; t, triplet; coupling constants, *J*, are quoted to the nearest ± 0.5 Hz. Ar refers to aryl resonances which could not be accurately assigned. Infrared (IR) spectra were acquired using a Perkin-Elmer Paragon 1000 FT-IR and absorption maxima (ν<sub>max</sub>) are reported in wavenumbers (cm<sup>-1</sup>) and assigned as strong (s), medium (m), weak (w) or broad (br). Mass spectra were recorded using Shimadzu gas chromatography *via* electron ionization (EI) or on a Waters TQD spectrometer coupled to an Acquity UPLC. Melting points are measured using Fisher Scientific™ IA9000 melting point apparatus.

#### 4.1.2 Key Building blocks

##### General Procedure A: Preparation of diaryl carbinols 5

Magnesium turnings (1.7 equiv.) were added to a 2-necked flask equipped with a reflux condenser and a dropping funnel containing a solution of bromobenzene (1.3 equiv.) in THF (1M). About one-quarter of the bromobenzene solution was added to the magnesium turnings and heated to 60 °C. Once the reaction had initiated bromobenzene solution was added dropwise and the reaction was heated under reflux for 1 h. The solution was cooled to rt and the substituted benzaldehyde (1 equiv.) in THF (1M) was added dropwise. The reaction was stirred overnight at rt and then quenched with saturated NH<sub>4</sub>Cl(aq.). The mixture was washed with EtOAc (3 x 20 mL), dried over MgSO<sub>4</sub> filtered, concentrated and the residue purified by chromatography.

*4-Chlorophenyl(phenyl)methanol 5a*

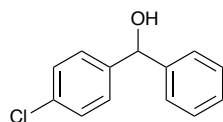

Obtained following general procedure A in 98% yield as a white solid. m.p. 59 – 60 °C;  $\nu_{\max}$  (ATR) 3355 (br, m), 3065 (w), 3030 (w), 2981 (w), 1601 (w), 1486 (s), 1453 (m), 1402 (m), 1345 (w), 1319 (w), 1288 (w), 1273 (w), 1247 (w), 1192 (m), 1086 (m), 1034 (m), 1022 (s), 1011 (s)  $\text{cm}^{-1}$ .  $\delta_{\text{H}}$  (700 MHz,  $\text{CDCl}_3$ ) 7.36 – 7.26 (9H, m, ArH), 5.81 (1H, s, Ar<sub>2</sub>CH), 2.25 (1H, s, OH).  $\delta_{\text{C}}$  (176 MHz,  $\text{CDCl}_3$ ) 143.6 (ArC), 142.3 (ArC), 133.4 (ArC), 128.8 (ArC), 128.7 (ArC), 128.0 (ArC), 128.0 (ArC), 126.7 (ArC), 75.6 (Ar<sub>2</sub>C).  $m/z$  (LC-MS, ESI<sup>+</sup>) 218 ( $\text{M}^{(35\text{Cl})\text{H}^+}$ ), 220 ( $\text{M}^{(37\text{Cl})\text{H}^+}$ ).

#### 4-Bromophenyl(phenyl)methanol **5c**

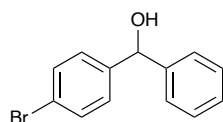

Obtained following general procedure A in 66% yield as an off-white solid. m.p. 64 – 65 °C;  $\nu_{\max}$  (ATR) 3352 (br), 3063 (w), 2904 (w), 1906 (w), 1600 (w), 1481 (s), 1397 (m), 1190 (m), 1008 (s)  $\text{cm}^{-1}$ ;  $\delta_{\text{H}}$  (700 MHz,  $\text{CDCl}_3$ ) 7.47 – 7.43 (2H, m, ArH), 7.36 – 7.31 (4H, m, ArH), 7.30 – 7.27 (1H, m, ArH), 7.26 – 7.21 (2H, m, ArH), 5.76 (1H, s, Ar<sub>2</sub>CH), 2.39 (1H, s, OH);  $\delta_{\text{C}}$  (176 MHz,  $\text{CDCl}_3$ ) 143.5 (C-1'), 142.8 (C-1), 131.7 (ArC), 128.8 (ArC), 128.3 (ArC), 128.0 (ArC), 126.6 (ArC), 121.5 (C-4), 75.8 (Ar<sub>2</sub>CHO);  $m/z$  (LC-MS, ESI<sup>+</sup>) 245 ( $\text{M}^{(79\text{Br})-\text{OH}^+}$ ), 247 ( $\text{M}^{(81\text{Br})-\text{OH}^+}$ ).

#### (4-Methoxyphenyl)(phenyl)methanol **5d**

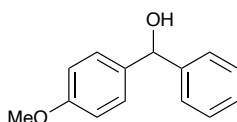

Obtained following general procedure A in 43% yield as a white solid. m.p. 63 – 64 °C;  $\nu_{\max}$  (ATR) 3401 (br, w), 1610 (m), 1587 (w), 1510 (s), 1494 (s), 1445 (s), 1304 (w), 1249 (s), 1239 (s), 1172 (s), 1110 (w), 1031 (s), 1018 (s), 1008 (s)  $\text{cm}^{-1}$ .  $\delta_{\text{H}}$  (700 MHz,  $\text{CDCl}_3$ ) 7.40 - 7.36 (2H, m, ArH), 7.36 - 7.32 (2H, m, ArH), 7.32 – 7.26 (3H, m, ArH), 6.89 – 6.86 (2H, m, ArH), 5.83 – 5.80 (1H, m, Ar<sub>2</sub>CH), 3.80 – 3.78 (3H, m, CH<sub>3</sub>), 2.19 – 2.17 (1H, m, OH).  $\delta_{\text{C}}$  (176 MHz,  $\text{CDCl}_3$ ) 159.2 (ArC), 144.2 (ArC), 136.3 (ArC), 128.6 (ArC), 128.1 (ArC), 127.6 (ArC), 126.5 (ArC), 114.0 (ArC), 76.0 (Ar<sub>2</sub>C), 55.4 (CH<sub>3</sub>).  $m/z$  (GC-MS, EI) 214 ( $\text{M}^+$ ).

#### (3-Methoxyphenyl)(phenyl)methanol **5e**

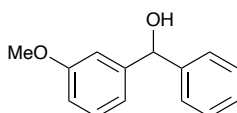

Obtained following general procedure A in 66% yield as a yellow oil.  $\nu_{\max}$  (ATR) 3404 (w), 1597 (m), 1585 (m), 1487 (m), 1453 (m), 1435 (m), 1314 (w), 1255 (s), 1186 (w), 1147 (m), 1021 (s)  $\text{cm}^{-1}$ .  $\delta_{\text{H}}$  (700 MHz,  $\text{CDCl}_3$ ) 7.40 - 7.37 (2H, m, ArH), 7.36 - 7.33 (2H, m, ArH), 7.30 - 7.24 (2H, m, ArH), 6.98 - 6.95 (2H, m, ArH), 6.83 - 6.80 (1H, m, ArH), 5.79 (1H, s,  $\text{Ar}_2\text{CH}$ ), 3.79 (3H, s,  $\text{CH}_3$ ), 2.45 (1H, s, OH).  $\delta_{\text{C}}$  (176 MHz,  $\text{CDCl}_3$ ) 159.8 (C-3), 145.6 (C-1), 143.8 (C-1'), 129.6 (ArC), 128.6 (ArC), 127.7 (ArC), 126.6 (ArC), 119.0 (ArC), 113.1 (ArC), 112.2 (ArC), 76.2 ( $\text{Ar}_2\text{C}$ ), 55.3 ( $\text{CH}_3$ ).  $m/z$  (GC-MS, EI) 214 ( $\text{M}^+$ ).

*(4-Fluorophenyl)(phenyl)methanol 5f*

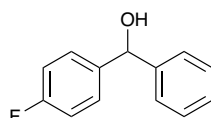

Obtained following general procedure A in 99% yield as a white solid m.p. 48–49 °C;  $\nu_{\max}$  (ATR) 3378 (br, m), 1602 (m), 1508 (s), 1494 (s), 1447 (m), 1419 (w), 1335 (w), 1270 (w), 1227 (s), 1173 (m), 1159 (m), 1097 (w), 1014 (s).  $\delta_{\text{H}}$  (700 MHz,  $\text{CDCl}_3$ ) 7.38 - 7.28 (7H, m, ArH), 7.04 - 7.00 (2H, m, ArH), 5.77 (1H, s,  $\text{Ar}_2\text{CH}$ ), 2.64 (1H, s, OH).  $\delta_{\text{C}}$  (176 MHz,  $\text{CDCl}_3$ ) 162.2 (d,  $J = 245.5$  Hz, C-4), 143.7 (C-1'), 139.7 (d,  $J = 3.0$  Hz, C-1), 128.7 (ArC), 128.3 (d,  $J = 8.0$  Hz, C-2), 127.8 (ArC), 126.6 (ArC), 115.4 (d,  $J = 21.5$  Hz, C-3), 75.6 ( $\text{Ar}_2\text{CH}$ ).  $\delta_{\text{F}}$  (376 MHz,  $\text{CDCl}_3$ ) -115.06 (s, 4-F).  $m/z$  (GC-MS, EI) 214 ( $\text{M}^+$ ).

*Bis(4-fluorophenyl)methanol 5g*

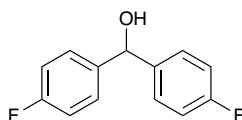

Obtained following general procedure A in 71% yield as a low melting solid. m.p. 46 - 47 °C;  $\nu_{\max}$  (ATR) 3247 (br, m), 1603 (m), 1506 (s), 1416 (w), 1326 (w), 1299 (w), 1218 (s), 1182 (m), 1155 (m), 1023 (m), 1011 (m).  $\delta_{\text{H}}$  (700 MHz,  $\text{CDCl}_3$ ) 7.34 - 7.29 (4H, m, 2-H), 7.06 - 6.99 (4H, m, 3-H), 5.79 (1H, s,  $\text{Ar}_2\text{CH}$ ).  $\delta_{\text{C}}$  (176 MHz,  $\text{CDCl}_3$ ) 162.4 (C-4, d,  $J = 246.0$  Hz), 139.5 (C-1, d,  $J = 3.0$  Hz), 128.3 (C-2, d,  $J = 8.0$  Hz), 115.5 (C-3, d,  $J = 21.5$  Hz), 75.1 ( $\text{Ar}_2\text{CH}$ ).  $\delta_{\text{F}}$  (376 MHz,  $\text{CDCl}_3$ ) -114.70 (4-F).  $m/z$  (LC-MS, ESI<sup>+</sup>) 203 ( $\text{M-OH}^+$ ). Accurate mass: Found ( $\text{M-OH}^+$ ), 203.0678;  $\text{C}_{13}\text{H}_9\text{F}_2$  requires  $M$ , 203.0672.

*(R)-(4-chlorophenyl)(phenyl)methanol (R)-5a<sup>2</sup>*

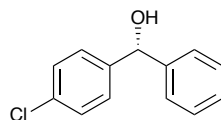

$\text{Et}_2\text{Zn}$  (2.4 mL, 3.6 mmol) was added dropwise to a solution of phenylboronic acid (146 mg, 1.2 mmol) in toluene (3 mL) under an argon atmosphere. After stirring for 12 h at 60 °C, the mixture was cooled to 0 °C and a toluene solution of [(2R)-1-methylpyrrolidin-2-yl]diphenylmethanol (27 mg, 0.1 mmol) was

introduced. The reaction was stirred for an additional 15 min and the 4-chlorobenzaldehyde (70 mg, 0.5 mmol) then added. After stirring for 12 h at 0 °C the reaction was quenched with H<sub>2</sub>O (2 mL) and extracted with DCM (3 x 5 mL). The combined organic layers were dried over MgSO<sub>4</sub>, filtered, and concentrated. Purification by chromatography (10% EtOAc in hexanes) to afford the desired product (77 mg, 56%) as a white solid.  $[\alpha]_D^{25}$  (c = 1.00 g/100 mL, CHCl<sub>3</sub>) -27° lit:<sup>2</sup>  $[\alpha]_D^{25}$  (c = 1.00 g/100 mL, CHCl<sub>3</sub>) -16°; 95 % ee (determined by chiral HPLC analysis).  $\nu_{\max}$  (ATR) 3347 (br, m), 1489 (s), 1453 (m), 1089 (s), 1012 (s).  $\delta_H$  (400 MHz, CDCl<sub>3</sub>) 7.41 - 7.28 (9H, m, ArH), 5.81 (1H, s, Ar<sub>2</sub>CH), 2.42 (1H, s, OH).  $\delta_C$  (101 MHz, CDCl<sub>3</sub>) 143.5 (ArC), 142.3 (ArC), 133.4 (ArC), 128.8 (ArC), 128.7 (ArC), 127.9(9) (ArC), 127.9(6) (ArC), 126.6 (ArC), 75.7 (Ar<sub>2</sub>CH).  $m/z$  (LC-MS, ESI<sup>+</sup>) 201 (M(<sup>35</sup>Cl)-OH<sup>+</sup>), 203 (M(<sup>37</sup>Cl)-OH<sup>+</sup>).

*(S)*-(4-chlorophenyl)(phenyl)methanol (**S**)-5a

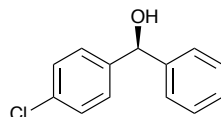

Et<sub>2</sub>Zn (2.4 mL, 3.6 mmol) was added dropwise to a solution of phenylboronic acid (146 mg, 1.2 mmol) in toluene (3 mL) under an argon atmosphere. After stirring for 12 h at 60 °C, the mixture was cooled to 0 °C and a toluene solution of [(2*S*)-1-methylpyrrolidin-2-yl]diphenylmethanol (27 mg, 0.1 mmol) was introduced. The reaction was stirred for an additional 15 min and 4-chlorobenzaldehyde **8** (70 mg, 0.5 mmol) then added. After stirring for 12 h at 0 °C, the reaction was quenched with H<sub>2</sub>O (2 mL) and extracted with DCM (3 x 5 mL). The combined organic layers were dried over MgSO<sub>4</sub>, filtered and concentrated. Purification by chromatography (10% EtOAc in hexanes) to afford the desired product (134 mg, 97%) as a white solid.  $[\alpha]_D^{25}$  (c = 1.00 g/100 mL, CHCl<sub>3</sub>) +17.9° (lit:<sup>2</sup>  $[\alpha]_D^{25}$  (c = 1.00 g/100 mL, CHCl<sub>3</sub>) +19°) 96 % ee (determined by chiral HPLC analysis). All other data identical to that described above for the (*R*)-isomer.

*(2R)*-2-(2-chloroethyl)-1-methylpyrrolidine hydrochloride (**R**)-3<sup>3</sup>

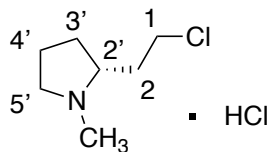

To a solution of 2-[(2*R*)-*N*-methylpyrrolidin-2'-yl]ethan-1'-ol (77 mg, 0.59 mmol) in chloroform (1.2 mL), a solution of thionyl chloride (0.12 mL) in chloroform (0.4 mL) was added dropwise at 0 °C, and the resulting mixture was refluxed for 2h and concentrated under reduced pressure to afford the crude product as a brown oil. This was recrystallised from ethanol-diethylether to provide product (63 mg, 72%) as a brown solid.  $[\alpha]_D^{25}$  (c = 1.00 g/100 mL, CHCl<sub>3</sub>) +47° (lit:<sup>3</sup>  $[\alpha]_D^{25}$  (c = 1.00 g/100 mL, CHCl<sub>3</sub>) -49.8°. M.p. 126 - 127 °C (lit.<sup>3</sup>: 119 - 121 °C);  $\nu_{\max}$  (ATR) 3410 (br, w), 2959 (w), 2550 (br, w), 1495 (w).  $\delta_H$  (700 MHz, CDCl<sub>3</sub>) 12.56 -

12.44 (1H, s, N<sup>+</sup>H), 3.92 - 3.84 (2H, m, 5'-HH'), 1-HH'), 3.58 - 3.53 (1H, m, 1-HH'), 3.41 - 3.34 (1H, m, 2'-H), 2.91 - 2.85 (1H, m, 5'-HH'), 2.84 (3H, d, *J* = 5.0 Hz, CH<sub>3</sub>), 2.57 - 2.51 (1H, m, 2-HH'), 2.49 - 2.42 (1H, m, 2-HH'), 2.38 - 2.31 (1H, m, 3'-HH'), 2.30 - 2.23 (1H, m, 4'-HH'), 2.11 - 2.03 (1H, m, 4'-HH'), 2.02 - 1.95 (1H, m, 3'-HH'). δ<sub>c</sub> (176 MHz, CDCl<sub>3</sub>) 66.6 (C-2'), 56.4 (C-5'), 41.7 (C-1), 39.6 (CH<sub>3</sub>), 32.6 (C-2), 29.4 (C-3'), 21.7 (C-4'). *m/z* (LC-MS, ESI<sup>+</sup>) 148 (MH<sup>+</sup>).

4-Chlorophenyl(phenyl)azidomethane **12**<sup>4</sup>

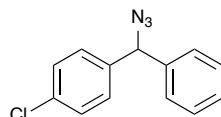

To a 0 °C solution of TMSN<sub>3</sub> (94%, 2.82 mL, 20.04 mmol), TsOH·H<sub>2</sub>O (98%, 1.30 g, 6.68 mmol) and BF<sub>3</sub>·Et<sub>2</sub>O (1.68 mL, 13.36 mmol) in toluene (17 mL) was slowly added a solution of alcohol **5a** (1.46 g, 6.68 mmol) in toluene (17 mL). The reaction mixture was stirred at 0 °C for 30 min, after which TLC analysis revealed consumption of the starting material. The mixture was quenched with the addition of saturated NaHCO<sub>3(aq.)</sub> (15 mL) and extracted with EtOAc (3 × 20 mL). The combined organic extracts were washed with saturated NaHCO<sub>3(aq.)</sub> (30 mL) and brine (30 mL), then concentrated *in vacuo* before purification by chromatography on SiO<sub>2</sub> (10% → 20% ether in petrol) to afford the title compound (1.47 g, 90%) as a pale yellow oil. R<sub>f</sub> 0.61 (25% ether in petrol); ν<sub>max</sub> (ATR) 3083 (w), 3058 (w), 3023 (w), 2095 (s), 1594 (w), 1486 (m), 1447 (m), 1244 (m), 1089 (m), 1011 (m) cm<sup>-1</sup>; δ<sub>H</sub> (700 MHz, CDCl<sub>3</sub>) 7.39 – 7.35 (2H, m, 3'-H<sub>2</sub>), 7.34 – 7.31 (3H, m, 3-H<sub>2</sub>, 4'-H), 7.28 (2H, d, *J* = 7.5 Hz, 2'-H<sub>2</sub>), 7.25 (2H, d, *J* = 8.5 Hz, 2-H<sub>2</sub>), 5.68 (1H, s, Ar<sub>2</sub>CH(N<sub>3</sub>)); δ<sub>c</sub> (176 MHz, CDCl<sub>3</sub>) 139.1 (C-1'), 138.2 (C-1), 133.9 (C-4), 128.9 (C-3'), 128.8 (C-3), 128.7 (C-2), 128.3 (C-4'), 127.4 (C-2'), 67.8 (Ar<sub>2</sub>CH(N<sub>3</sub>)); *m/z* (LCMS, ESI<sup>+</sup>) 216 (M(<sup>35</sup>Cl) – N<sub>2</sub> + H<sup>+</sup>), 218 (M(<sup>37</sup>Cl) – N<sub>2</sub> + H<sup>+</sup>).

(2*S*)-(N-*tert*-Butoxycarbonyl)-2-ethynylpyrrolidine **13**<sup>5,6</sup>

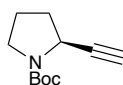

A solution of (*S*) *N*-Boc-prolinal (1.44 g, 7.23 mmol) in DCM (14 mL) was added dropwise to a 0 °C solution of PPh<sub>3</sub> (7.58 g, 28.91 mmol) and CBr<sub>4</sub> (4.79 g, 14.45 mmol) in DCM (120 mL). The resulting solution was stirred at rt for 30 min before being poured into cooled saturated NaHCO<sub>3(aq.)</sub> (100 mL) and the phases separated. The aqueous phase was washed with DCM (20 mL) and the combined organic extracts dried over MgSO<sub>4</sub> and concentrated under reduced pressure. The crude residue was purified by column chromatography (40:1:1 → 10:1:1, petrol : EtOAc : EtOH) to afford (*2S*)-(N-*tert*-Butoxycarbonyl)-2-(2',2'-dibromoethenyl)pyrrolidine (1.52 g, 59%) as an off-white solid. R<sub>f</sub> 0.45 (19:1:1, petrol : EtOAc : EtOH); M.p. 62 – 64 °C (lit.<sup>6</sup> 58 – 59 °C); To a solution of (*2S*)-(N-*tert*-Butoxycarbonyl)-2-(2',2'-dibromoethenyl)pyrrolidine (1.33 g, 3.75 mmol) in THF (33 mL), cooled to –78 °C, was added butyllithium

(1.6 M in hexanes, 24.70 mL, 7.49 mmol). The reaction mixture was stirred at  $-78\text{ }^{\circ}\text{C}$  for 1 h, when consumption of starting material was observed by TLC, then quenched by the addition of saturated  $\text{NH}_4\text{Cl}_{(\text{aq.})}$  (30 mL). The mixture was allowed to warm to RT, after which THF was removed under reduced pressure before extraction with ether ( $3 \times 20\text{ mL}$ ). The combined organic extracts were washed with brine (30 mL), dried over  $\text{MgSO}_4$  and concentrated *in vacuo* prior to purification by  $\text{SiO}_2$  column (10%  $\rightarrow$  30% EtOAc in petrol) to furnish the title compound (549 mg, 75%) as a yellow oil.  $R_f$  0.31 (19:1:1, petrol : EtOAc : EtOH);  $[\alpha]_{\text{D}}^{27}$  (c = 1.00 g/100 mL,  $\text{CHCl}_3$ )  $-49.5^{\circ}$  (lit.:<sup>5</sup>  $[\alpha]_{\text{D}}^{25}$  (c = 1.35 g/100 mL,  $\text{CHCl}_3$ )  $-66.3^{\circ}$ );  $\nu_{\text{max}}$  (ATR) 3304 (w), 3239 (w), 2971 (m), 2872 (w), 1689 (s), 1392 (s), 1365 (m), 1244 (m), 1158 (s), 1115 (m)  $\text{cm}^{-1}$ ;  $\delta_{\text{H}}$  (700 MHz,  $\text{CDCl}_3$ , mixture of rotamers) 4.50 – 4.42 (0.4H, m, 2-**H** rotamer B), 4.40 – 4.33 (0.6H, m, 2-**H** rotamer A), 3.46 – 3.38 (1H, m, 5-**HH'**), 3.31 – 3.23 (1H, m, 5-**HH'**), 2.21 – 2.15 (1H, m, 2'-**H**), 2.08 – 2.00 (2H, m, 3-**HH'**, 4-**HH'**), 2.00 – 1.96 (1H, m, 3-**HH'**), 1.89 – 1.83 (1H, m, 4-**HH'**), 1.44 (9H, s,  $\text{C}(\text{CH}_3)_3$ );  $\delta_{\text{C}}$  (176 MHz,  $\text{CDCl}_3$ , mixture of rotamers) 154.0 (**C=O**), 84.4 (**C-1'** rotamer A), 84.1 (**C-1'** rotamer B), 79.7 ( $\text{C}(\text{CH}_3)_3$ ), 69.8 (**C-2'** rotamer B), 69.4 (**C-2'** rotamer A), 48.0 (**C-2** rotamer A), 47.7 (**C-2** rotamer B), 45.9 (**C-5** rotamer B), 45.4 (**C-5** rotamer A), 33.6 (**C-3** rotamer A), 32.9 (**C-3** rotamer B), 28.4 ( $\text{C}(\text{CH}_3)_3$ ), 24.4 (**C-4** rotamer B), 23.5 (**C-4** rotamer A);  $m/z$  (LCMS,  $\text{ESI}^+$ ) 218 ( $\text{MNa}^+$ ).

*(4'-Chlorophenyl)phenylacetic acid 16<sup>7</sup>*

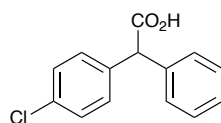

$\text{SnCl}_4$  (1.89 mL, 16.00 mmol) was added slowly to a solution of mandelic acid (1.54 g, 10.00 mmol) in chlorobenzene (6 mL). The reaction mixture was heated to reflux for 5.5 h before being cooled in an ice bath and quenched by the slow addition of saturated  $\text{NH}_4\text{Cl}_{(\text{aq.})}$  (20 mL) and  $\text{H}_2\text{O}$  (10 mL). The biphasic mixture was extracted with DCM ( $3 \times 15\text{ mL}$ ), concentrated and the resultant crude product then recrystallised from acetone and petrol to provide the title compound (985 mg, 40%) as an off-white solid.  $R_f$  0.52 (10% MeOH in DCM); M.p. 109 – 111  $^{\circ}\text{C}$  (lit.<sup>7</sup>: 116  $^{\circ}\text{C}$ );  $\nu_{\text{max}}$  (ATR) 3028 (br), 1707 (s), 1491 (m), 1403 (w), 1277 (w), 1215 (w), 1092 (w), 1015 (w)  $\text{cm}^{-1}$ ;  $\delta_{\text{H}}$  (700 MHz,  $\text{CDCl}_3$ ) 7.37 – 7.26 (9H, m, Ar**H**), 5.02 (1H, s, 2-**H**);  $\delta_{\text{C}}$  (176 MHz,  $\text{CDCl}_3$ ) 178.2 (**C=O**), 137.6 (Ar**C**), 136.5 (Ar**C**), 133.7 (**C-4'**), 130.2 (Ar**C**), 128.9(6) (Ar**C**), 128.9(5), (Ar**C**), 128.7 (Ar**C**), 127.9 (Ar**C**), 56.4 (**C-2**);  $m/z$  (LCMS,  $\text{ESI}^-$ ) 201 ( $\text{M}^{(35)\text{Cl}} - \text{CO}_2$ ), 203 ( $\text{M}^{(37)\text{Cl}} - \text{CO}_2$ ).

*1-[(2-Bromoethoxy)(phenyl)methyl]-4-chlorobenzene 8*

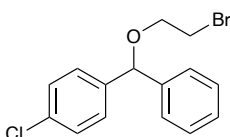



To a solution of 4-chlorophenyl(phenyl)methanol **5a** (218 mg, 1.00 mmol) and AuCl (33 mg, 0.23 mmol) in DCE was added 2-bromoethanol (0.1 mL, 1.41 mmol). The reaction was heated to 80 °C for 20 h. The solvent was then removed under reduced pressure and the residue purified by flash column chromatography (0 → 20% EtOAc in hexanes) to afford the title compound (282 mg, 87%) as a colourless oil.  $\nu_{\max}$  (ATR) 2858 (w), 1490 (m), 1453 (w), 1276 (w), 1185 (w), 1089 (m), 1029 (w), 1015 (m)  $\text{cm}^{-1}$ .  $\delta_{\text{H}}$  (700 MHz,  $\text{CDCl}_3$ ) 7.37 – 7.33 (4H, m, ArH), 7.32 – 7.27 (5H, m, ArH), 5.41 (1H, s, Ar<sub>2</sub>CH), 3.82 – 3.74 (2H, m, 2'-H), 3.53 (2H, t,  $J = 6.0$  Hz, 1'-H).  $\delta_{\text{C}}$  (176 MHz,  $\text{CDCl}_3$ ) 141.3 (ArC), 140.5 (ArC), 133.5 (ArC), 128.7(2) (ArC), 128.7(1) (ArC), 128.4(5) (ArC), 128.0 (ArC), 127.1 (ArC), 83.4 (Ar<sub>2</sub>CH), 69.1 (C-2'), 30.7 (C-1').  $m/z$  (LC-MS, ESI<sup>+</sup>) 347 (M(<sup>35</sup>Cl)(<sup>79</sup>Br) Na<sup>+</sup>), 349 (M(<sup>37</sup>Cl)(<sup>79</sup>Br) Na<sup>+</sup>) (M(<sup>35</sup>Cl)(<sup>81</sup>Br) Na<sup>+</sup>), 351 (M(<sup>37</sup>Cl)(<sup>81</sup>Br) Na<sup>+</sup>).

#### 1-[(3-bromopropoxy)(phenyl)methyl]-4-chlorobenzene

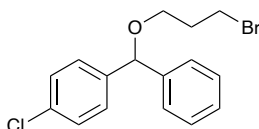

To a solution of 4-chlorophenyl(phenyl)methanol **5a** (500 mg, 2.29 mmol) and AuCl (33 mg, 0.23 mmol) in DCE was added 3-bromopropanol (318 mg, 2.29 mmol). This reaction was heated to 80 °C for 16 h. The solvent was then removed under reduced pressure and the residue purified by flash column chromatography (0 → 20% EtOAc in hexanes) to afford the product as a colourless oil (244 mg, 54%).  $\nu_{\max}$  (ATR) 3029 (w), 2866 (w), 1489 (m), 1088 (s), 1014 (m).  $\delta_{\text{H}}$  (700 MHz,  $\text{CDCl}_3$ ) 7.37 – 7.27 (9H, m, ArH), 5.5 (1H, s, Ar<sub>2</sub>CH), 3.61 – 3.56 (4H, m, 3'-H<sub>2</sub>, 1'-H<sub>2</sub>), 2.18 (2H, p,  $J = 6.0$  Hz, 2'-H<sub>2</sub>).  $\delta_{\text{C}}$  (176 MHz,  $\text{CDCl}_3$ ) 141.8 (ArC), 140.9 (ArC), 133.3 (ArC), 128.7 (ArC), 128.6 (ArC), 128.4 (ArC), 127.9 (ArC), 127.0 (ArC), 83.3 (Ar<sub>2</sub>CH), 66.6 (C-3'), 33.1 (C-2'), 30.8 (C-1').  $m/z$  (LC-MS, ESI<sup>+</sup>) 201 (M(<sup>35</sup>Cl)-OC<sub>3</sub>H<sub>6</sub>Br<sup>+</sup>), 203 (M(<sup>37</sup>Cl)-OC<sub>3</sub>H<sub>6</sub>Br<sup>+</sup>). Accurate mass: Found (M-OC<sub>3</sub>H<sub>6</sub>Br<sup>+</sup>), 201.0474: C<sub>13</sub>H<sub>10</sub><sup>35</sup>Cl requires M, 201.0471.

#### 1-[(4'-bromobutoxy)(phenyl)methyl]-4-chlorobenzene

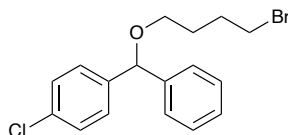

To a solution of 4-chlorophenyl(phenyl)methanol **5a** (531 mg, 2.43 mmol) and AuCl (56 mg, 0.24 mmol) in DCE was added 4-bromobutanol (372 mg, 2.43 mmol). The reaction was heated to 80 °C for 20 h. The solvent was then removed under reduced pressure and the residue purified by flash column chromatography (0 → 20% EtOAc in hexanes) to afford the title compound (350 mg, 41%) as a colourless oil.  $\nu_{\max}$  (ATR) 3029 (w), 2941 (w), 2863 (w), 1489 (m), 1086 (s), 1014 (m).  $\delta_{\text{H}}$  (600 MHz,  $\text{CDCl}_3$ ) 7.36 – 7.24 (9H, m, ArH), 5.30 (1H, s, Ar<sub>2</sub>CH), 3.47 (2H, t,  $J = 6.5$  Hz, 4'-H<sub>2</sub>), 3.43 (2H, t,  $J = 6.5$  Hz, 1'-H<sub>2</sub>), 2.00 (2H, p,  $J = 6.5$  Hz, 2'-H), 1.79 (2H, p,  $J = 6.5$  Hz, 3'-H).  $\delta_{\text{C}}$  (176 MHz,  $\text{CDCl}_3$ ) 142.0 (C-1<sup>Ph</sup>), 141.1 (C-1'<sup>Ph</sup>), 133.2 (C-4<sup>Ph</sup>),

128.6(4) (**C**-3'<sup>Ph</sup>), 128.6(1) (**C**-3<sup>Ph</sup>), 128.3 (**C**-2<sup>Ph</sup>), 127.8 (**C**-4'<sup>Ph</sup>), 127.0 (**C**-2'<sup>Ph</sup>), 83.1 (Ar<sub>2</sub>CH), 68.1 (**C**-4'), 33.8 (**C**-1'), 29.9 (**C**-2'), 28.5 (**C**-3'). *m/z* (LC-MS, ESI<sup>+</sup>) 201 (M(<sup>35</sup>Cl)-OC<sub>4</sub>H<sub>8</sub>Br]<sup>+</sup>), 203 (M(<sup>37</sup>Cl)-OC<sub>4</sub>H<sub>8</sub>Br]<sup>+</sup>). Accurate mass: Found ([M-OC<sub>4</sub>H<sub>8</sub>Br]<sup>+</sup>), 201.0480: C<sub>13</sub>H<sub>10</sub><sup>35</sup>Cl requires *M*, 201.0471.

*(2R)*-1-(2-chloroethyl)-2-methylpyrrolidine hydrochloride

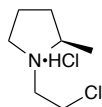

2-Bromoethanol (0.23 mL, 3.20 mmol) in dry MeCN (2 mL) was added dropwise to a mixture of (*R*)-2-methylpyrrolidine (415mg, 3.32 mmol) and K<sub>2</sub>CO<sub>3</sub> (918 mg, 6.64 mmol) in dry MeCN (2 mL) heated under reflux. After 15 h the mixture was cooled to rt, filtered and concentrated. Et<sub>2</sub>O (5 mL) was then added and the product extracted with 1M HCl (2 x 5 mL). The aqueous phase was made basic with solid NaOH, then extracted with DCM (3 x 5 mL). The organic layers were combined, dried over Na<sub>2</sub>SO<sub>4</sub>, filtered and concentrated to afford 2-((*2R*)-2-methylpyrrolidin-1-yl)ethan-1-ol (200 mg, 48%) as a colourless oil which was used directly in the next step without further purification. [α]<sub>D</sub> (c = 1.00 g/100 mL, CHCl<sub>3</sub>) -58.8°. *v*<sub>max</sub> (ATR) 3385 (br, m), 2963 (m), 2875 (m), 2806 (m), 1677 (m), 1416 (m), 1509 (m). δ<sub>H</sub> (400 MHz, CDCl<sub>3</sub>) 4.03 – 3.86 (3H, m, 2-**H**<sub>2</sub>, 5'-**HH'**), 3.42 – 3.35 (1H, m, 1-**HH'**), 3.33 – 3.23 (1H, m, 2'-**H**), 3.01 – 2.91 (2H, m, 1-**HH'**, 5'-**HH'**), 2.29 – 2.18 (2H, m, 3'-**HH'**, 4-**HH'**), 2.08 – 1.98 (1H, m, 4-**HH'**), 1.97 – 1.87 (2H, m, 3'-**HH'**), 1.54 (3H, d, *J* = 6.5 Hz, **CH**<sub>3</sub>). δ<sub>C</sub> (176 MHz, CDCl<sub>3</sub>) 64.6 (**C**-2'), 57.6 (**C**-2), 57.2 (**C**-5'), 54.6 (**C**-1), 31.4 (**C**-3'), 21.7 (**C**-4'), 15.9 (**CH**<sub>3</sub>). *m/z* (LC-MS, ESI<sup>+</sup>) 130 (MH<sup>+</sup>). Accurate mass: Found (MH<sup>+</sup>), 130.1232: C<sub>7</sub>H<sub>16</sub>NO requires *M*, 130.1232. A solution of thionyl chloride (0.57 mL, 7.87 mmol) in chloroform (3 mL) was added dropwise to a solution of 2-((*2R*)-2-methylpyrrolidin-1-yl)ethan-1-ol (377 mg, 2.92 mmol) in chloroform (4 mL) at 0 °C. The resulting mixture was heated under reflux for 2 h and then concentrated under reduced pressure. Precipitation from a mixture of EtOH and Et<sub>2</sub>O afforded the title compound contaminated with 19% 2-((*2R*)-2-methylpyrrolidin-1-yl)ethan-1-ol hydrochloride (353 mg, 35%) as a brown semi-solid. [α]<sub>D</sub> (c = 1.00 g/100 mL, CHCl<sub>3</sub>) -23.7°. *v*<sub>max</sub> (ATR) 3392 (br, m), 2974 (m), 2554 (m), 2453 (m), 1452 (m), 1422 (m), 1393 (m). δ<sub>H</sub> (700 MHz, CDCl<sub>3</sub>, 19% 2-((*2R*)-2-methylpyrrolidin-1-yl)ethan-1-ol hydrochloride) 12.56 (1H, s, **NH**<sup>+</sup>), 4.15 – 4.10 (1H, m, 4'-**HH'**), 4.05 – 3.99 (1H, m, 4-**HH'**), 3.97 – 3.90 (1H, m, 5'-**HH'**), 3.72 – 3.66 (1H, m, 3'-**HH'**), 3.31 – 3.24 (1H, m, 2'-**H**), 3.12 – 3.05 (1H, m, 3'-**HH'**), 3.04 – 2.97 (1H, m, 5'-**HH'**), 2.30 – 2.17 (2H, m, 2-**H**<sub>2</sub>), 2.08 – 1.95 (2H, m, 1-**H**<sub>2</sub>), 1.64 (3H, d, *J* = 6.5 Hz, **CH**<sub>3</sub>). δ<sub>C</sub> (176 MHz, CDCl<sub>3</sub>) 65.3 (**C**-2'), 54.0 (**C**-3'), 53.8 (**C**-5'), 37.6 (**C**-4'), 31.1 (**C**-2), 21.6 (**C**-1), 15.7 (**CH**<sub>3</sub>). *m/z* (LC-MS, ESI<sup>+</sup>) 148 (M(<sup>35</sup>Cl)H<sup>+</sup>), 150 (M(<sup>37</sup>Cl)H<sup>+</sup>). In an identical fashion (*2S*)-1-(2-chloroethyl)-2-methylpyrrolidine hydrochloride was prepared from (*S*)-2-methylpyrrolidine [α]<sub>D</sub> (c = 1.00 g/100 mL, CHCl<sub>3</sub>) +20.4°. All spectroscopic data identical with that reported for the *R* enantiomer.

*(2S)-1-(3-chloropropyl)-2-methylpyrrolidine hydrochloride*

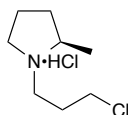

3-Bromopropanol (0.72 mL, 7.9 mmol) in dry MeCN (5 mL) was added dropwise to a mixture of (*S*)-2-methylpyrrolidine (1 g, 8.2 mmol) and K<sub>2</sub>CO<sub>3</sub> (2.27g, 16.4 mmol) in dry MeCN (5 mL) heated under reflux. After 15 h the mixture was cooled to rt, filtered and concentrated. Et<sub>2</sub>O (10 mL) was then added and the product extracted with 1M HCl (2 x 10 mL). The aqueous phase was made more basic with solid NaOH, then extracted with DCM (3 x 10 mL). The organic layers were combined, dried over Na<sub>2</sub>SO<sub>4</sub>, filtered and concentrated to afford 3-[(*2S*)-2-methylpyrrolidin-1-yl]propan-1-ol (620 mg, 55%) as a colourless oil which was used directly in the next step without further purification.  $\nu_{\max}$  (ATR) 3372 (br), 2961 (m), 2872 (w), 1114 (w).  $\delta_{\text{H}}$  (400 MHz, CDCl<sub>3</sub>) 3.81 – 3.72 (2H, m, 3-**H**<sub>2</sub>), 3.35 – 3.26 (1H, m, 1-**HH'**), 3.02 – 2.91 (1H, m, 5'-**HH'**), 2.43 – 2.34 (1H, m, 5'-**HH'**), 2.33 – 2.23 (1H, m, 2'-**HH'**), 2.13 - 2.02 (1H, m, 1-**HH'**), 2.01 - 1.81 (2H, m, 2-**HH'**, 3'-**HH'**), 1.79 – 1.60 (2H, m, 4'-**H**<sub>2</sub>), 1.58 - 1.46 (1H, m, 2-**HH'**), 1.43 - 1.29 (1H, m, 3'-**HH'**), 1.11 (3H, d, *J* = 6.0 Hz, **CH**<sub>3</sub>).  $\delta_{\text{C}}$  (176 MHz, CDCl<sub>3</sub>) 69.3 (**C**-2'), 61.9 (**C**-5'), 54.0 (**C**-1), 50.9 (**C**-3), 32.2 (**C**-3'), 27.3 (**C**-2), 21.6 (**C**-4'), 18.1 (**CH**<sub>3</sub>). *m/z* (LC-MS, ESI<sup>+</sup>) 144 (MH<sup>+</sup>). Accurate mass: Found (MH<sup>+</sup>), 144.1393: C<sub>8</sub>H<sub>18</sub>NO requires *M*, 144.1388. A solution of thionyl chloride (0.74 mL, 10.24 mmol) in chloroform (2 mL) was added dropwise to a solution of 3-[(*2S*)-2-methylpyrrolidin-1-yl]propan-1-ol (491 mg, 3.43 mmol) in chloroform (6 mL) at 0 °C. The mixture was heated to reflux for 2 h and concentrated under reduced pressure. The product was precipitated from ethanol and diethylether to afford the title compound (172 mg, 25%) contaminated with ~20% 3-[(*2S*)-2-methylpyrrolidin-1-yl]propan-1-ol hydrochloride as a white solid. *m.p.* 125 – 127 °C.  $\nu_{\max}$  (ATR) 3404 (br), 2964 (m), 2600 (w), 2511 (w), 1633 (w), 1453 (w), 1063 (w).  $\delta_{\text{H}}$  (700 MHz, CDCl<sub>3</sub>, ~20% 3-[(*2S*)-2-methylpyrrolidin-1-yl]propan-1-ol hydrochloride) 12.15 (1H, s, N<sup>+</sup>H), 3.93 - 3.83 (1H, m, 5'-**HH'**), 3.74 – 3.62 (2H, m, 3-**H**<sub>2</sub>), 3.44 - 3.37 (1H, m, 1-**HH'**), 3.24 – 3.12 (1H, m, 2'-**H**), 3.00 – 2.92 (1H, m, 1-**HH'**), 2.89 – 2.79 (1H, m, 5'-**HH'**), 2.72 – 2.61 (1H, m, 2-**HH'**), 2.29 - 2.16 (3H, m, 3'-**HH'**, 4'-**HH'**, 2-**HH'**), 2.11 – 1.96 (2H, m, 3'-**HH'**, 4'-**HH'**), 1.64 (3H, d, *J* = 6.5 Hz, **CH**<sub>3</sub>).  $\delta_{\text{C}}$  (176 MHz, CDCl<sub>3</sub>) 65.3 (**C**-2'), 53.5 (**C**-5'), 51.4 (**C**-1), 42.1 (**C**-3), 31.5 (**C**-3'), 28.2 (**C**-2), 21.5 (**C**-4'), 15.7 (**CH**<sub>3</sub>). *m/z* (LC-MS, ESI<sup>+</sup>) 162 (M(<sup>35</sup>Cl)H<sup>+</sup>), 164 (M(<sup>37</sup>Cl)H<sup>+</sup>). Accurate mass: Found (MH<sup>+</sup>), 162.1041: C<sub>8</sub>H<sub>17</sub>N<sup>35</sup>Cl requires *M*, 162.1050.

#### 4.1.3 Final Products

2-(2'-[4'''Chlorophenyl]{phenyl}methoxy)ethylpyrrolidine **7**

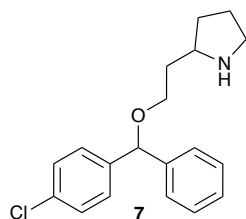

Racemic homoprolinol **6b** (100 mg, 0.45 mmol, 1 eq.), diarylcarbinol **5a** (99 mg, 0.45 mmol), *p*-toluenesulfonic acid monohydrate (1.1 eq.), toluene (0.25M) and 4 Å molecular sieves were combined and the mixture was heated under reflux for 2 h before being cooled and quenched by the addition of 1 M NaOH<sub>(aq)</sub>. The mixture was extracted with EtOAc and the organic extracts washed with brine, dried over MgSO<sub>4</sub> and concentrated *in vacuo*. Purification of the resultant crude material by chromatography afforded (0% → 5% MeOH in CHCl<sub>3</sub> with 1% NEt<sub>3</sub>), furnished the *title compound* (94 mg, 66%) as a clear light brown oil. *R*<sub>f</sub> 0.35 (10% MeOH and 1% NH<sub>4</sub>OH<sub>(aq)</sub> in CHCl<sub>3</sub>); *v*<sub>max</sub> (ATR) 3368 (br), 2938 (m), 2866 (m), 1489 (m), 1452 (w), 1400 (w), 1181 (w), 1087 (s), 1012 (m) cm<sup>-1</sup>; *δ*<sub>H</sub> (700 MHz, CDCl<sub>3</sub> mixture of diastereomers) 7.33 – 7.27 (4H, m, ArH), 7.27 – 7.23 (5H, m, ArH), 5.30 (1H, s, 1''-H), 4.30 – 4.10 (1H, m, NH), 3.55 – 3.49 (2H, m, 2'-H<sub>2</sub>), 3.31 – 3.25 (1H, m, 2-H), 3.06 (1H, dddd, *J* = 10.5, 9.0, 8.0, 6.0 Hz, 5-HH'), 2.93 (1H, dtd, *J* = 10.5, 8.5, 6.5 Hz, 5-HH'), 1.96 – 1.87 (2H, m, 3-HH', 1'-HH'), 1.86 – 1.78 (2H, m, 4-HH', 1'-HH'), 1.78 – 1.71 (1H, m, 4-HH'), 1.41 – 1.34 (1H, m, 3-HH'); *δ*<sub>C</sub> (176 MHz, CDCl<sub>3</sub>, mixture of diastereomers) 142.0 (ArC), 141.9 (ArC), 141.1(1) (ArC), 141.0(5) (ArC), 133.3 (ArC), 133.2 (ArC), 128.7 (ArC), 128.6(3) (ArC), 128.6(1) (ArC), 128.3(8) (ArC), 128.3(7) (ArC), 127.7(9) (ArC), 127.7(7) (ArC), 127.0(3) (ArC), 127.0(0) (ArC), 83.2(2) (C-1''), 83.2(0) (C-1''), 67.3 (C-2'), 67.2 (C-2'), 57.1(7) (C-2), 57.1(5) (C-2), 46.1(3) (C-5), 46.1(2) (C-5), 35.4 (C-1'), 35.3 (C-1'), 31.6(0) (C-3), 31.5(7) (C-3), 25.0 (C-4), 24.9 (C-4); *m/z* (LCMS, ESI<sup>+</sup>) 316 (M(<sup>35</sup>Cl)H<sup>+</sup>), 318 (M(<sup>37</sup>Cl)H<sup>+</sup>); Accurate mass: Found MH<sup>+</sup>, 316.1467; C<sub>19</sub>H<sub>23</sub>NO<sup>35</sup>Cl requires *M*, 316.1468.

(*S,R,S*) 2-(2'-[4'''-Chlorophenyl]{phenyl}methoxy)ethyl-1-methylpyrrolidine **9**

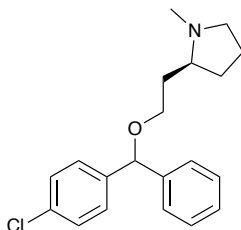

Following the same procedure as described for **7**, diarylcarbinol **5a** (109 mg, 0.50 mmol) and *N*-methyl homoprolinol (**S**)-**6b** (65 mg, 0.50 mmol) were combined to afford following chromatography (0% → 10% MeOH in CHCl<sub>3</sub> with 1% NEt<sub>3</sub>), the *title compound* (56 mg, 34%) as a colourless oil. *R*<sub>f</sub> 0.36 (10% MeOH and 1% NEt<sub>3</sub> in CHCl<sub>3</sub>); *v*<sub>max</sub> (ATR) 2946 (m), 2940 (w), 2771 (m), 1488 (m), 1452 (m), 1086 (s), 1013 (m) cm<sup>-1</sup>; *δ*<sub>H</sub> (400 MHz, CDCl<sub>3</sub>, mixture of diastereomers) 7.28 – 7.16 (9H, m, ArH), 5.22 (1H, s, 1''-H), 3.48 – 3.35 (2H,

m, 2'-H<sub>2</sub>), 3.07 – 3.00 (1H, m, 5-HH'), 2.27 (3H, s, NCH<sub>3</sub>), 2.22 – 1.97 (3H, m, 2-H, 5-HH', 1'-HH'), 1.91 – 1.79 (1H, m, 3-HH'), 1.77 – 1.67 (1H, m, 4-HH'), 1.66 – 1.58 (1H, m, 4-HH'), 1.57 – 1.47 (1H, m, 1'-HH'), 1.46 – 1.36 (1H, m, 3-HH'); δ<sub>c</sub> (101 MHz, CDCl<sub>3</sub>, mixture of diastereomers) 142.0(9) (ArC), 142.0(5) (ArC), 141.2(2) (ArC), 141.1(9) (ArC), 133.2(4) (ArC), 133.2(1) (ArC), 128.6(4) (ArC), 128.6(3) (ArC), 128.6(0) (ArC), 128.4 (ArC), 128.3 (ArC), 127.8 (ArC), 127.7 (ArC), 127.0(3) (ArC), 126.9(7) (ArC), 83.2(4) (C-1''), 83.2(2) (C-1'), 67.2 (C-2'), 67.1 (C-2'), 64.2 (C-2), 57.2 (C-5), 40.5 (NCH<sub>3</sub>), 33.9 (C-1'), 31.0 (C-3), 30.9 (C-3), 22.0 (C-4); m/z (LCMS, ESI<sup>+</sup>) 330 (M(<sup>35</sup>Cl)H<sup>+</sup>), 332 (M(<sup>37</sup>Cl)H<sup>+</sup>); Accurate mass: Found MH<sup>+</sup>, 330.1617: C<sub>20</sub>H<sub>25</sub>NO<sup>35</sup>Cl requires M, 330.1625.

(R, RS) 2-(2'-[4'''-Chlorophenyl]{phenyl}methoxy)ethyl)-1-methylpyrrolidine **10**

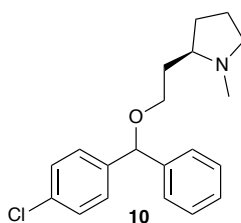

Following the same procedure as described for **7**, diarylcarbinol **5a** (109 mg, 0.50 mmol) and N-methyl homoprolinol (**S**)-**6b** (65 mg, 0.50 mmol) were combined to afford following chromatography (0% → 10% MeOH in CHCl<sub>3</sub> with 1% NEt<sub>3</sub>), the *title ether 9b* (94 mg, 57%) as a viscous colourless oil. R<sub>f</sub> 0.36 (10% MeOH and 1% NEt<sub>3</sub> in CHCl<sub>3</sub>); ν<sub>max</sub> (ATR) 3026 (w), 2938 (m), 2840 (w), 2774 (m), 1488 (m), 1452 (m), 1087 (s), 1013 (m) cm<sup>-1</sup>; δ<sub>H</sub> (700 MHz, CDCl<sub>3</sub>, mixture of diastereomers) 7.33 – 7.22 (9H, m, ArH), 5.28 (1H, s, Ar<sub>2</sub>CHO), 3.52 – 3.42 (2H, m, 2'-H<sub>2</sub>), 3.07 – 3.03 (1H, m, 5-HH'), 2.30 (3H, s, NCH<sub>3</sub>), 2.18 – 2.04 (3H, m, 2-H, 5-HH', 1'-HH'), 1.92 – 1.86 (1H, m, 3-HH'), 1.77 – 1.70 (1H, m, 4-HH'), 1.68 – 1.62 (1H, m, 4-HH'), 1.57 – 1.50 (1H, m, 1'-HH'), 1.48 – 1.41 (1H, m, 3-HH'); δ<sub>c</sub> (176 MHz, CDCl<sub>3</sub>, mixture of diastereomers) 142.2 (ArC), 142.1 (ArC), 141.2(8) (ArC), 141.2(5) (ArC), 133.2(2) (ArC), 133.1(9) (ArC), 128.6(4) (ArC), 128.6(3) (ArC), 128.6(0) (ArC), 128.4 (ArC), 128.3 (ArC), 127.8 (ArC), 127.7 (ArC), 127.0(3) (ArC), 126.9(8) (ArC), 83.2(3) (Ar<sub>2</sub>CHO), 83.2(1) (Ar<sub>2</sub>CHO), 67.2(9) (C-2'), 67.2(6) (C-2'), 63.9(4) (C-2), 63.9(3) (C-2), 57.3 (C-5), 40.6 (NCH<sub>3</sub>), 34.2 (C-1'), 31.1 (C-3), 31.0 (C-3), 22.1 (C-4); m/z (LCMS, ESI<sup>+</sup>) 330 (M(<sup>35</sup>Cl)H<sup>+</sup>), 332 (M(<sup>37</sup>Cl)H<sup>+</sup>); Accurate mass: Found MH<sup>+</sup>, 330.1619: C<sub>20</sub>H<sub>25</sub>NO<sup>35</sup>Cl requires M, 330.1625.

(*S, SR*) (*N*-Methyl)-2-(1'-[4'''-chlorophenyl]{phenyl}methyl)-1',2',3'-triazol-4'-yl)pyrrolidine **14a**

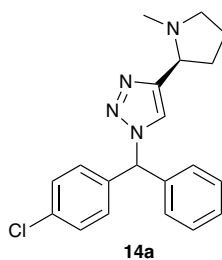

A microwave vial was charged with azide **12** (139 mg, 0.57 mmol), alkyne (**S**)-**13** (98 mg, 0.50 mmol),  $\text{CuSO}_4 \cdot 5\text{H}_2\text{O}_{(\text{aq})}$  (1 M, 0.20 mL, 0.20 mmol), freshly prepared  $\text{Na ascorbate}_{(\text{aq})}$  (1 M, 1.00 mL, 1.00 mmol),  $\text{H}_2\text{O}$  (1 mL) and  $\text{MeOH}$  (1 mL). The vial was sealed and reacted at 60 °C for 40 min, with a 30 s pre-mixing time. The mixture was then cooled, diluted with  $\text{H}_2\text{O}$  (5 mL) and extracted with DCM (3 × 10 mL) and the combined organic extracts washed with brine (10 mL), dried over  $\text{MgSO}_4$  and concentrated under reduced pressure. The crude residue was then purified by column chromatography (50% → 70% ether in petrol) to provide the (*N*-*tert*-Butoxycarbonyl)-2-(1'-[4'''-chlorophenyl]{phenyl}methyl)-1',2',3'-triazol-4'-yl)pyrrolidine (153 mg, 70%) as a white solid.  $R_f$  0.10 (50% ether in petrol); m.p. 56 – 58 °C;  $\nu_{\text{max}}$  (ATR) 2976 (w), 2928 (w), 2881 (w), 2017 (w), 1676 (s), 1490 (m), 1452 (w), 1391 (s), 1248 (w), 1162 (m), 1110 (w)  $\text{cm}^{-1}$ ;  $\delta_{\text{H}}$  (500 MHz,  $(\text{CD}_3)_2\text{SO}$ , 90 °C, mixture of diastereomers) 7.71 (1H, apparent d,  $J = 1.0$  Hz, 1''-H), 7.42 (2H, d,  $J = 8.5$  Hz, ArH), 7.40 – 7.34 (3H, m, ArH), 7.24 – 7.18 (5H, m, ArH), 4.88 (1H, dd,  $J = 8.0$ , 3.0 Hz, 2-H), 3.42 – 3.32 (2H, m, 5- $\text{H}_2$ ), 2.25 – 2.16 (1H, m, 3- $\text{HH}'$ ), 2.10 – 2.01 (1H, m, 3- $\text{HH}'$ ), 2.00 – 1.91 (1H, m, 4- $\text{HH}'$ ), 1.89 – 1.81 (1H, m, 4- $\text{HH}'$ ), 1.23 (9H, s,  $\text{C}(\text{CH}_3)_3$ );  $\delta_{\text{C}}$  (176 MHz,  $\text{CDCl}_3$ , mixture of rotamers and diastereomers) 154.2 (C=O), 150.7 (ArC), 149.1 (ArC), 137.8 (ArC), 136.9 (ArC), 134.6 (ArC), 129.3 (ArC), 129.0 (ArC), 127.9 (ArC), 122.6 (ArC), 120.9 (ArC), 79.5 ( $\text{C}(\text{CH}_3)_3$  rotamer A), 79.3 ( $\text{C}(\text{CH}_3)_3$  rotamer B), 67.3 (C-1'') 53.6 (C-2 rotamer A), 52.7 (C-2 rotamer B), 46.6 (C-5 rotamer B), 46.4 (C-5 rotamer A), 32.8 (C-3), 28.3 ( $\text{C}(\text{CH}_3)_3$ ), 24.6 (C-4 rotamer B), 23.4 (C-4 rotamer A);  $m/z$  (LCMS,  $\text{ESI}^+$ ) 439 ( $\text{M}^{(35}\text{Cl})\text{H}^+$ ), 441 ( $\text{M}^{(37}\text{Cl})\text{H}^+$ ); Accurate mass: Found  $\text{MH}^+$ , 439.1898:  $\text{C}_{24}\text{H}_{28}\text{N}_4\text{O}_2^{35}\text{Cl}$  requires  $M$ , 439.1901. To a suspension of  $\text{LiAlH}_4$  (95%, 45 mg, 1.12 mmol) in ether (4.5 mL), cooled in an ice bath, was added (*N*-*tert*-Butoxycarbonyl)-2-(1'-[4'''-chlorophenyl]{phenyl}methyl)-1',2',3'-triazol-4'-yl)pyrrolidine (123 mg, 0.28 mmol). The reaction mixture was allowed to warm to RT and stirred for 2 h, after which the solution was re-cooled to 0 °C quenched according to Fieser's method. The residue was purified by column chromatography (0% → 5% EtOH in petrol with 5% EtOAc and 10%  $\text{NEt}_3$ ) to furnish the *title compound* **14a** (34 mg, 34%) as a white solid.  $R_f$  0.22 (5% EtOH, 5% EtOAc and 10%  $\text{NEt}_3$  in petrol); M.p. 100 – 103 °C;  $\nu_{\text{max}}$  (ATR) 2971 (m), 2933 (m), 2876 (m), 2784 (m), 1491 (m), 1438 (m)  $\text{cm}^{-1}$ ;  $\delta_{\text{H}}$  (700 MHz,  $\text{CDCl}_3$ , mixture of diastereomers) 7.37 – 7.30 (6H, m, ArH), 7.10 – 7.07 (3H, m, ArH, 1''-H isomer 1), 7.04 – 7.00 (2H, m, ArH, 1''-H isomer 2), 3.44 (1H, t,  $J = 8.0$  Hz, 2-H), 3.15 (1H, apparent t,  $J = 8.5$  Hz, 5- $\text{HH}'$ ), 2.32 – 2.24 (2H, m, 5- $\text{HH}'$ , 3- $\text{HH}'$ ), 2.26 (3H, s,  $\text{NCH}_3$ ), 1.94 – 1.86 (1H, m, 4- $\text{HH}'$ ), 1.86 – 1.77 (2H, m, 3- $\text{HH}'$ , 4- $\text{HH}'$ );

$\delta_c$  (176 MHz, CDCl<sub>3</sub>, mixture of diastereomers) 150.4 (**C-4'** isomer 1), 150.1 (**C-4'** isomer 2), 138.3 (ArC), 137.7 (ArC), 136.9 (ArC), 134.5 (ArC), 129.4 (ArC), 129.3 (ArC), 129.1 (ArC), 129.0 (ArC), 128.9 (ArC), 128.7 (ArC), 128.5 (ArC), 128.4 (ArC), 128.1 (ArC), 128.0 (ArC), 120.6 (**C-5'** isomer 1), 120.5 (**C-5'** isomer 2), 68.1 (**C-1''** isomer 1), 67.4 (**C-1''** isomer 2), 62.8 (**C-2** isomer 1), 62.7 (**C-2** isomer 2), 56.8 (**C-5**), 40.6 (**C-6**), 33.2 (**C-3**), 22.3 (**C-4**);  $m/z$  (LCMS, ESI<sup>+</sup>) 353 (M(<sup>35</sup>Cl)H<sup>+</sup>), 355 (M(<sup>37</sup>Cl)H<sup>+</sup>); Accurate mass: Found MH<sup>+</sup>, 353.1530: C<sub>20</sub>H<sub>22</sub>N<sub>4</sub><sup>35</sup>Cl requires *M*, 353.1533.

(*R, SR*)-(N-Methyl)-2-(1'-[4'''-chlorophenyl]{phenyl}methyl)-1',2',3'-triazol-4'-yl)pyrrolidine **14b**

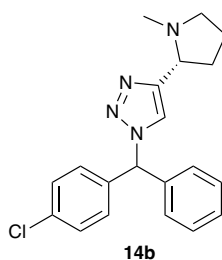

In an identical fashion to that describe above for **14a**, (*N*-Methyl)-2-(1'-[4'''-chlorophenyl]{phenyl}methyl)-1',2',3'-triazol-4'-yl)pyrrolidine **14b** was prepared via cycloaddition of azide with (*R*)-alkyne **13** followed by reduction of the resultant triazole with LiAlH<sub>4</sub>. *R<sub>f</sub>* 0.22 (5% EtOH, 5% EtOAc and 10% NEt<sub>3</sub> in petrol);  $\nu_{\max}$  (ATR) 2950 (m), 2840 (m), 2773 (m), 1491 (s), 1451 (m), 1210 (m), 1090 (s), 1041 (s) cm<sup>-1</sup>;  $\delta_H$  (400 MHz, CDCl<sub>3</sub>, mixture of diastereomers) 7.38 – 7.29 (6H, m, ArH), 7.12 – 7.00 (5H, m, ArH, 1''-H), 3.46 (1H, t, *J* = 8.0 Hz, 2-H), 3.16 (1H, ddd, *J* = 10.0, 8.5, 2.5 Hz, 5-HH'), 2.36 – 2.22 (5H, m, 3-HH', 5-HH', NCH<sub>3</sub>), 1.96 – 1.77 (3H, m, 3-HH', 4-H<sub>2</sub>);  $\delta_c$  (101 MHz, CDCl<sub>3</sub>, mixture of diastereomers) 150.4 (**C-4'**), 138.4 (ArC), 137.9 (ArC), 137.0 (ArC), 134.6 (ArC), 129.6 (ArC), 129.5 (ArC), 129.2(3) (ArC), 129.1(8) (ArC), 129.0 (ArC), 128.9(0) (ArC), 128.8(7) (ArC), 128.6(2) (ArC), 128.6(0) (ArC), 128.3 (ArC), 128.2 (ArC), 120.8 (**C-5'**), 67.6 (**C-1''**), 62.9 (**C-2**), 57.0 (**C-5**), 40.7 (NCH<sub>3</sub>), 33.3 (**C-3**), 22.5 (**C-4**);  $m/z$  (LCMS, ESI<sup>+</sup>) 353 (M(<sup>35</sup>Cl)H<sup>+</sup>), 355 (M(<sup>37</sup>Cl)H<sup>+</sup>); Accurate mass: Found MH<sup>+</sup>, 353.1527: C<sub>20</sub>H<sub>22</sub>N<sub>4</sub><sup>35</sup>Cl requires *M*, 353.1533.

#### General procedure B: formation of amides **19**, **21-24**, **S1-S58**

To a mixture of amine (1 eq.), *N*-methylmorpholine (NMM) (1.1 eq.) and EDCI•HCl (1.1 eq.) in DCM (3 mL.mmol<sup>-1</sup>) at 0 °C was added acid (1 eq.) and HOBT (1.1 eq.) in DCM (3 mL.mmol<sup>-1</sup>). DMF was added as required to aid solvation. After being stirred at RT overnight, the reaction mixture was quenched with H<sub>2</sub>O (4 mL.mmol<sup>-1</sup>) and passed through a phase separator. The resultant solution was concentrated and purified *via* reversed-phase flash column chromatography to afford the amide. Where relevant, deprotection of the N Boc group was achieved by dissolving the protected amide in a mixture of DCM (0.9 mL) and TFA (0.1 mL). After stirring at rt for 3 h, all volatiles were removed under high vacuum to provide the *title compound*.

*N*-([Pyrrolidin-2''-yl]methyl)-2-(4'-chlorophenyl)-2-phenylacetamide TFA salt **19**

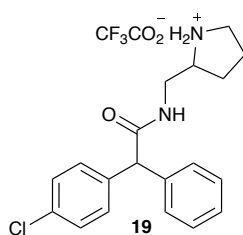

M.p. 149 – 151 °C;  $\nu_{\max}$  (ATR) 3252 (br), 3066 (w), 1665 (s), 1646 (s), 1563 (m), 1191 (m), 1156 (m) 1133 (s)  $\text{cm}^{-1}$ ;  $\delta_{\text{H}}$  (600 MHz,  $\text{CDCl}_3$ , mixture of diastereomers) 10.13 – 9.95 (1H, m, 1''- $\text{NH}_2^+$ ), 8.85 – 8.65 (1H, m, 1''- $\text{NH}_2^+$ ), 8.06 (0.5H, t,  $J = 6.0$  Hz, 1- $\text{NH}$  isomer 1), 7.98 (0.5H, t,  $J = 6.0$  Hz, 1- $\text{NH}$  isomer 2), 7.40 – 7.10 (9H, m, ArH), 4.92 (1H, s, 2-H), 3.76 – 3.63 (1H, m, 2''-H), 3.62 – 3.50 (1H, m, NH(CHH')), 3.45 – 3.29 (1H, m, NH(CHH')), 3.13 – 2.94 (2H, m, 5''- $\text{H}_2$ ), 2.02 – 1.93 (1H, m, 3''-HH'), 1.92 – 1.80 (2H, m, 4''- $\text{H}_2$ ), 1.65 – 1.52 (1H, m, 3''-HH');  $\delta_{\text{C}}$  (151 MHz,  $\text{CDCl}_3$ , mixture of diastereomers) 174.4 (9) (C-1), 174.4(8) (C-1), 162.3 (q,  $J = 37.5$  Hz, TFA C=O), 138.8 (ArC), 138.6 (ArC), 137.7 (ArC), 137.5 (ArC), 133.4(3) (ArC), 133.3(9) (ArC), 130.3(4) (ArC), 130.2(7) (ArC), 129.0 (ArC), 128.9 (ArC), 128.8 (ArC), 128.7 (ArC), 127.7(0) (ArC), 127.6(6) (ArC), 60.7(1) (C-2''), 60.6(9) (C-2''), 57.4(3) (C-2), 57.3(8) (C-2), 45.4 (C-5''), 45.3 (C-5''), 40.8 (NH(CHH')), 27.6 (C-3''), 24.0 (C-4'');  $\delta_{\text{F}}$  (376 MHz,  $\text{CDCl}_3$ ) -75.88 ( $\text{CF}_3\text{CO}_2\text{H}$ );  $m/z$  (LCMS,  $\text{ESI}^+$ ) 329 ( $\text{M}^{(35}\text{Cl})\text{H}^+$ ), 331 ( $\text{M}^{(37}\text{Cl})\text{H}^+$ ); Accurate mass: Found  $\text{MH}^+$ , 329.1426:  $\text{C}_{19}\text{H}_{22}\text{N}_2\text{O}^{35}\text{Cl}$  requires  $M$ , 329.1421.

*N*-([4'''-Chlorophenyl]phenylmethyl)-2-(pyrrolidin-2'-yl)acetamide TFA salt **21**

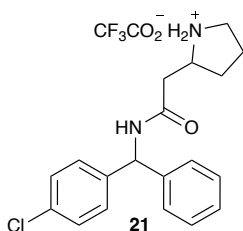

M.p. 189 – 191 °C;  $\nu_{\max}$  (ATR) 3262 (br), 3031 (w), 2951 (w), 2360 (w), 1653 (br, s), 1542 (m), 1491 (m), 1197 (s), 1137 (s)  $\text{cm}^{-1}$ ;  $\delta_{\text{H}}$  (600 MHz,  $\text{CDCl}_3$ , mixture of diastereomers) 9.17 – 9.06 (1H, m, 1'- $\text{NH}_2^+$ ), 8.92 – 8.82 (1H, m, 1'- $\text{NH}_2^+$ ), 7.52 (0.5H, d,  $J = 7.0$  Hz, 1- $\text{NH}$  isomer 1), 7.47 (0.5H, d,  $J = 7.0$  Hz, 1- $\text{NH}$  isomer 2), 7.34 – 7.24 (5H, m, ArH), 7.20 – 7.12 (4H, m, ArH), 6.03 – 5.97 (1H, m, 1''-H), 3.79 – 3.71 (1H, m, 2'-H), 3.21 – 3.13 (1H, m, 5'-HH'), 3.13 – 3.05 (1H, m, 5'-HH'), 3.01 – 2.94 (1H, m, 2-HH'), 2.77 – 2.69 (1H, m, 2-HH'), 2.12 – 2.04 (1H, m, 3'-HH'), 2.02 – 1.94 (1H, m, 4'-HH'), 1.91 – 1.82 (1H, m, 4'-HH'), 1.70 – 1.62 (1H, m, 3'-HH');  $\delta_{\text{C}}$  (151 MHz,  $\text{CDCl}_3$ , mixture of diastereomers) 170.0(4) (C-1), 170.0(2) (C-1), 161.3 (q,  $J = 38.5$  Hz, TFA C=O), 140.3(2) (ArC), 140.3(1) (ArC), 139.4 (ArC), 133.8 (ArC), 133.6 (ArC), 129.1 (ArC), 129.0(3) (ArC), 129.0(0) (ArC), 128.9 (ArC), 128.7 (ArC), 128.2 (ArC), 128.0 (ArC), 127.5 (ArC), 127.2 (ArC), 57.6 (C-1''), 57.5 (C-1''), 57.2 (C-2'), 57.1 (C-2'), 45.5 (C-5'), 36.3(6) (C-2), 36.3(5) (C-2), 30.0 (C-3'), 29.9 (C-



3'), 23.7(7) (**C-4'**), 23.7(5) (**C-4'**);  $\delta_F$  (376 MHz,  $CDCl_3$ ) -76.19 ( $CF_3CO_2H$ );  $m/z$  (LCMS,  $ESI^+$ ) 329 ( $M(^{35}Cl)H^+$ ), 331 ( $M(^{37}Cl)H^+$ ); Accurate mass: Found  $MH^+$ , 329.1422:  $C_{19}H_{22}N_2O^{35}Cl$  requires  $M$ , 329.1421.

*N*-([Tetrahydrofuran-2''-yl]methyl)-2-(4'-chlorophenyl)-2-phenylacetamide **22**

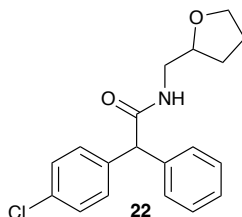

Obtained in 66% yield as an off-white solid. m.p. 62 – 64 °C;  $\nu_{max}$  (ATR) 3312 (br), 3086 (w), 3026 (w), 3026 (w), 2964 (w), 2875 (w), 1650 (s), 1544 (m), 1490 (s), 1448 (w), 1360 (w), 1222 (w), 1086 (m), 1015 (m)  $cm^{-1}$ ;  $\delta_H$  (400 MHz,  $CDCl_3$ , mixture of diastereomers) 7.36 – 7.19 (9H, m, **ArH**), 6.05 – 5.98 (1H, m, **NH**), 4.87 (0.5H, s, **2-H**), 4.86 (0.5H, s, **2-H**), 3.94 (1H, qd,  $J = 7.0, 3.5$  Hz, **2''-H**), 3.74 – 3.64 (2H, m, **5''-H<sub>2</sub>**), 3.60 (0.5H, ddd,  $J = 5.5, 3.5, 2.5$  Hz, **NHCHH'** isomer A), 3.56 (0.5H, ddd,  $J = 5.5, 3.5, 2.5$  Hz, **NHCHH'** isomer B), 3.24 (0.5H, ddd,  $J = 7.0, 5.5, 4.5$  Hz, **NHCHH'** isomer A), 3.21 (0.5H, ddd,  $J = 7.0, 5.5, 4.5$  Hz, **NHCHH'** isomer B), 1.98 – 1.85 (1H, m, **3''-HH'**), 1.89 – 1.72 (2H, m, **4''-H<sub>2</sub>**), 1.53 – 1.43 (1H, m, **3''-HH'**);  $\delta_C$  (101 MHz,  $CDCl_3$ , mixture of diastereomers) 171.6(8) (**C=O**), 171.6(6) (**C=O**), 139.1(2) (**ArC**), 139.0(8) (**ArC**), 138.1 (**ArC**), 138.0 (**ArC**), 133.2 (**C-4'**), 130.4 (**ArC**), 130.3 (**ArC**), 129.0 (**ArC**), 128.9(3) (**ArC**), 128.8(8) (**ArC**), 128.8(5) (**ArC**), 128.8 (**ArC**), 127.6 (**ArC**), 77.7 (**C-2''**), 77.6 (**C-2''**), 68.3 (**C-5''**), 58.6 (**C-2**), 58.5 (**C-2**), 43.4(2) (**NHCHH'** isomer B), 43.4(1) (**NHCHH'** isomer A), 28.6(2) (**C-3''**), 28.6(0) (**C-3''**), 26.0 (**C-4''**);  $m/z$  (LCMS,  $ESI^+$ ) 330 ( $M(^{35}Cl)H^+$ ), 332 ( $M(^{37}Cl)H^+$ ); Accurate mass: Found  $MH^+$ , 330.1261:  $C_{19}H_{21}NO_2^{35}Cl$  requires  $M$ , 330.1261.

*N*-([4'-Chlorophenyl]phenylmethyl)-2-cyclopentylacetamide **23**

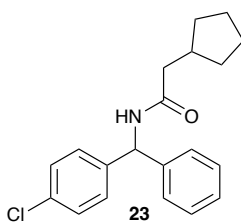

Obtained in 79% yield as colourless needles.  $R_f$  0.36 (10% EtOAc in hexanes); M.p 146 – 148 °C;  $\nu_{max}$  (ATR) 3274 (br), 3030 (w), 2949 (m), 2867 (w), 1637 (s), 1533 (m), 1490 (m), 1366 (m), 1217 (m), 1091 (m)  $cm^{-1}$ ;  $\delta_H$  (700 MHz,  $CDCl_3$ ) 7.33 (2H, t,  $J = 7.5$  Hz, **3<sup>Ph</sup>-H<sub>2</sub>**), 7.31 – 7.27 (3H, m, **3'-H<sub>2</sub>**, **4<sup>Ph</sup>-H**), 7.19 (2H, d,  $J = 7.5$  Hz, **2<sup>Ph</sup>-H<sub>2</sub>**), 7.16 (2H, d,  $J = 8.0$  Hz, **2'-H<sub>2</sub>**), 6.23 (1H, d,  $J = 8.0$  Hz, **NHCH**), 5.97 (1H, d,  $J = 8.0$  Hz, **NHCH**), 2.29 – 2.23 (3H, m, **2-H<sub>2</sub>**, **1<sup>Cyp</sup>-H**), 1.86 – 1.80 (2H, m, **2<sup>Cyp</sup>-H<sub>2</sub>H'<sub>2</sub>**), 1.66 – 1.59 (2H, m, **3<sup>Cyp</sup>-H<sub>2</sub>H'<sub>2</sub>**), 1.59 – 1.52 (2H, m, **3<sup>Cyp</sup>-H<sub>2</sub>H'<sub>2</sub>**), 1.19 – 1.12 (2H, m, **2<sup>Cyp</sup>-H<sub>2</sub>H'<sub>2</sub>**);  $\delta_C$  (176 MHz,  $CDCl_3$ ) 172.0 (**C-1**), 141.3 (**C-1<sup>Ph</sup>**), 140.3 (**C-1'**), 133.4 (**C-4'**), 129.0 (**ArC**), 128.9 (**ArC**), 128.8 (**ArC**), 127.9 (**C-4<sup>Ph</sup>**), 127.6 (**C-2<sup>Ph</sup>**), 56.5 (**NHCH**), 43.2 (**C-2**), 37.3

(C-1<sup>Cyp</sup>), 32.7(7) (C-2<sup>Cyp</sup>), 32.7(6) (C-2<sup>Cyp</sup>), 25.2 (C-3<sup>Cyp</sup>); *m/z* (LCMS, ESI<sup>+</sup>) 328 (M(<sup>35</sup>Cl)H<sup>+</sup>), 330 (M(<sup>37</sup>Cl)H<sup>+</sup>); Accurate mass: Found MH<sup>+</sup>, 328.1484: C<sub>20</sub>H<sub>23</sub>NO<sup>35</sup>Cl requires *M*, 328.1468.

*N*-(1''-[2'''-Dimethylaminoethyl]indazol-6''-yl)-2-(4'-chlorophenyl)-2-phenylacetamide **24**

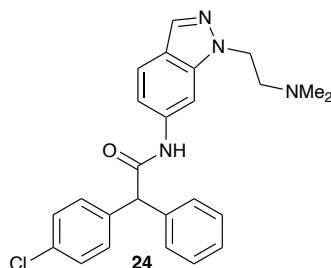

Obtained in 9% yield as a yellow oil.  $\nu_{\max}$  (ATR) 3306 (br), 3264 (w), 3070 (w), 2952 (w), 2862 (w), 2818 (w), 2780 (w), 1661 (m), 1625 (m), 1587 (m), 1546 (m), 1489 (s), 1462 (m), 1359 (m), 1310 (m), 1256 (w), 1167 (m), 1092 (m) cm<sup>-1</sup>;  $\delta_{\text{H}}$  (600 MHz, CDCl<sub>3</sub>) 8.23 (1H, br s, 7''-H), 7.91 (1H, s, 3''-H), 7.57 (1H, d, *J* = 8.5 Hz, 4''-H), 7.45 (1H, br s, NH), 7.42 – 7.37 (2H, m, 3<sup>Ph</sup>-H<sub>2</sub>), 7.36 – 7.31 (5H, m, 3'-H<sub>2</sub>, 2<sup>Ph</sup>-H<sub>2</sub>, 4<sup>Ph</sup>-H), 7.30 – 7.27 (2H, m, 2'-H<sub>2</sub>), 6.68 (1H, dd, *J* = 8.5, 1.5 Hz, 5''-H), 5.08 (1H, s, 2-H), 4.43 (2H, t, *J* = 7.0 Hz, 1'''-H<sub>2</sub>), 2.81 (2H, t, *J* = 7.0 Hz, 2'''-H<sub>2</sub>), 2.29 (6H, s, N(CH<sub>3</sub>)<sub>2</sub>);  $\delta_{\text{C}}$  (151 MHz, CDCl<sub>3</sub>) 169.9 (C=O), 140.1 (C-9''), 138.6 (C-1<sup>Ph</sup>), 137.5 (C-1'), 136.0 (C-6''), 133.7 (C-4'), 133.1 (C-3''), 130.5 (C-2'), 129.4 (C-3<sup>Ph</sup>), 129.2 (C-3'), 129.0 (C-2<sup>Ph</sup>), 128.1 (C-4<sup>Ph</sup>), 121.7 (C-4''), 121.2 (C-8''), 114.2 (C-5''), 99.4 (C-7''), 59.7 (C-2), 58.5 (C-2'''), 47.2 (C-1'''), 45.9 (N(CH<sub>3</sub>)); *m/z* (LCMS, ESI<sup>+</sup>) 433 (M(<sup>35</sup>Cl)H<sup>+</sup>), 435 (M(<sup>37</sup>Cl)H<sup>+</sup>); Accurate mass: Found MH<sup>+</sup>, 433.1769: C<sub>25</sub>H<sub>26</sub>N<sub>4</sub>O<sup>35</sup>Cl requires *M*, 433.1795.

1-(2'-[Dimethylamino]ethyl)-6-([4''-chlorophenyl]{phenyl}methoxy)methylindazole **27**

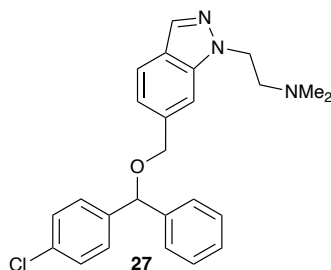

Methyl 1*H*-indazole-6-carboxylate **26** (264 mg, 1.50 mmol) was stirred with K<sub>2</sub>CO<sub>3</sub> (622 mg, 4.50 mmol) and 2-chloro-*N,N*-dimethylethylamine hydrochloride salt (99%, 327 mg, 2.25 mmol) in DMF (5 mL) at 80 °C for 14 h. The reaction mixture was then cooled and diluted with H<sub>2</sub>O (60 mL) prior to washing with EtOAc (6 × 10 mL). After combining the organic fractions, the volatiles were removed under reduced pressure and the crude mixture separated by flash chromatography on silica (10% → 90% EtOAc in hexanes with 1% NEt<sub>3</sub>) to afford methyl-1-(2'-[dimethylamino]ethyl)indazole-6-carboxylate (199 mg, 54%) found as a yellow oil.

To a stirred suspension of LiAlH<sub>4</sub> (300 mg, 7.89 mmol) in THF (15 mL) at 0 °C was slowly added a solution of methyl-1-(2'-[dimethylamino]ethyl)indazole-6-carboxylate (650 mg, 2.63 mmol) in THF (3 mL). After 1 h at RT, the mixture was re-cooled in an ice bath and quenched according to Fieser's method. Subsequent removal of volatiles *in vacuo* afforded the 1-(2'-[dimethylamino]ethyl)-6-(hydroxymethyl)indazole (577 mg, quantitative) as a pale yellow oil.

To a cooled solution of diarylcarbinol **5a** (139 mg, 0.64 mmol) in DCM (1 mL) was added NEt<sub>3</sub> (116 μL, 0.83 mmol) and methanesulfonyl chloride (59 μL, 0.76 mmol). The mixture was stirred at RT until consumption of starting material was observed by TLC. After dilution with DCM (10 mL), the mixture was washed with H<sub>2</sub>O (5 mL), 1 M HCl<sub>(aq.)</sub> (5 mL) then saturated NaHCO<sub>3(aq.)</sub> (5 mL), before being dried over MgSO<sub>4</sub>. Removal of volatiles under reduced pressure afforded the crude benzhydryl chloride **25** which was used immediately.

To a 0 °C solution of NaH (60%, 18 mg, 0.45 mmol) in DMF (0.25 mL) was added 1-(2'-[dimethylamino]ethyl)-6-(hydroxymethyl)indazole (93 mg, 0.42 mmol) in DMF (0.5 mL). After stirring at RT for 2 h, a solution of crude benzhydryl chloride **25** in DMF (0.5 mL) was added and the reaction mixture heated to 80 °C for 4.5 h. The mixture was re-cooled to 0 °C and quenched by the addition of ice cold H<sub>2</sub>O (15 mL) prior to extraction with EtOAc (6 × 5 mL). The combined organic washings were washed with brine (15 mL), concentrated *in vacuo* then purified on SiO<sub>2</sub> column (50% EtOAc in CHCl<sub>3</sub> with 1% NEt<sub>3</sub>) to furnish the *title compound* (25 mg, 14%) as a clear colourless oil. R<sub>f</sub> 0.28 (40% EtOAc in CHCl<sub>3</sub> with 1% NEt<sub>3</sub>); ν<sub>max</sub> (ATR) 3063 (w), 3031 (w), 2971 (w), 2861 (w), 2819 (w), 2768 (w), 1489 (m), 1455 (m), 1366 (s), 1217 (s), 1087 (s), 1014 (m) cm<sup>-1</sup>; δ<sub>H</sub> (600 MHz, CDCl<sub>3</sub>) 7.98 (1H, s, 3-**H**), 7.69 (1H, d, *J* = 8.0 Hz, 4-**H**), 7.41 (1H, s, 7-**H**), 7.39 – 7.26 (9H, m, Ar**H**), 7.13 (1H, d, *J* = 8.0 Hz, 5-**H**), 5.45 (1H, s, Ar<sub>2</sub>CH), 4.68 (2H, s, OCH<sub>2</sub>), 4.49 (2H, t, *J* = 7.0 Hz, 1'-**H**<sub>2</sub>), 2.85 (2H, t, *J* = 7.0 Hz, 2'-**H**<sub>2</sub>), 2.32 (6H, s, N(CH<sub>3</sub>)<sub>2</sub>); δ<sub>C</sub> (151 MHz, CDCl<sub>3</sub>) 141.7 (C-1<sup>Ph</sup>), 140.8 (C-1''), 139.9 (C-9), 136.9 (C-6), 133.4 (C-4''), 133.2 (C-3), 128.7(4) (ArC), 128.7(2) (ArC), 128.6 (ArC), 128.0 (ArC), 127.2 (ArC), 123.8 (C-8), 121.3 (C-4), 120.8 (C-5), 107.9 (C-7), 82.1 (Ar<sub>2</sub>CH), 71.0 (OCH<sub>2</sub>), 58.5 (C-2'), 47.1 (C-1'), 45.7 (N(CH<sub>3</sub>)<sub>2</sub>); *m/z* (LCMS, ESI<sup>+</sup>) 420 (M(<sup>35</sup>Cl)H<sup>+</sup>), 422 (M(<sup>37</sup>Cl)H<sup>+</sup>); Accurate mass: Found MH<sup>+</sup>, 420.1845: C<sub>25</sub>H<sub>27</sub>N<sub>3</sub>O<sup>35</sup>Cl requires *M*, 420.1843.

#### *N*-(Diphenylmethyl)-2-(4'-chlorophenyl)-2-phenylacetamide **S1**

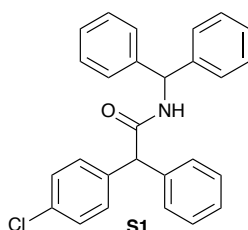

Obtained in 67% yield as an off-white solid. M.p. 196 – 199 °C; ν<sub>max</sub> (ATR) 3270 (br), 3070 (w), 3021 (w), 1647 (s), 1490 (m), 1481 (m), 1368 (w), 1222 (w) cm<sup>-1</sup>; δ<sub>H</sub> (600 MHz, CDCl<sub>3</sub>) 7.35 – 7.26 (11H, m, 3'-**H**<sub>2</sub>,

$3^{\text{Ph}'}\text{-(H}_2)_2$ ,  $4^{\text{Ph}'}\text{-(H)}_2$ ,  $3^{\text{Ph}}\text{-H}_2$ ,  $4^{\text{Ph}}\text{-H}$ , 7.22 (2H, d,  $J = 7.5$  Hz,  $2^{\text{Ph}}\text{-H}_2$ ), 7.18 (2H, d,  $J = 8.0$  Hz,  $2'\text{-H}_2$ ), 7.11 (4H, d,  $J = 8.0$  Hz,  $2^{\text{Ph}'}\text{-(H}_2)_2$ ), 6.29 (1H, d,  $J = 8.0$  Hz,  $\text{NHCHPh}_2$ ), 6.17 (1H, d,  $J = 8.0$  Hz,  $\text{NHCHPh}_2$ ), 4.93 (1H, s,  $2\text{-H}$ );  $\delta_{\text{C}}$  (151 MHz,  $\text{CDCl}_3$ ) 170.6 ( $\text{C=O}$ ), 141.3(3) ( $\text{C-1}^{\text{Ph}'}$ ), 141.3(0) ( $\text{C-1}^{\text{Ph}}$ ), 139.0 ( $\text{C-1}^{\text{Ph}}$ ), 137.9 ( $\text{C-1}'$ ), 133.4 ( $\text{C-4}'$ ), 130.4 ( $\text{C-2}'$ ), 129.1 (ArC), 129.0 (ArC), 128.9 (ArC), 128.8 (ArC), 127.8 (ArC), 127.7 (ArC), 127.4 ( $\text{C-2}^{\text{Ph}'}$ ), 58.5 ( $\text{C-2}$ ), 57.3 ( $\text{NHCHPh}_2$ );  $m/z$  (LCMS,  $\text{ESI}^+$ ) 412 ( $\text{M}^{(35}\text{Cl})\text{H}^+$ ), 414 ( $\text{M}^{(37}\text{Cl})\text{H}^+$ ); Accurate mass: Found  $\text{MH}^+$ , 412.1473:  $\text{C}_{27}\text{H}_{23}\text{NO}^{35}\text{Cl}$  requires  $M$ , 412.1468.

**1-(4''-[[1'''-Methylimidazol-2'''-yl]methyl]piperazin-1''-yl)-2-(4'-chlorophenyl)-2-phenylethan-1-one S2**

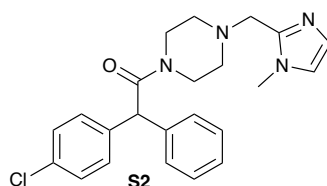

Obtained in 37% yield as an orange-brown oil.  $\nu_{\text{max}}$  (ATR) 3061 (w), 3026 (w), 2942 (w), 2817 (w), 1640 (s), 1434 (m), 1366 (m), 1267 (m), 1199 (s), 1126 (s), 1032 (m)  $\text{cm}^{-1}$ ;  $\delta_{\text{H}}$  (600 MHz,  $\text{CDCl}_3$ ) 7.34 – 7.30 (2H, m,  $3^{\text{Ph}}\text{-H}_2$ ), 7.28 – 7.24 (3H, m,  $3'\text{-H}_2$ ,  $4^{\text{Ph}}\text{-H}$ ), 7.21 – 7.17 (2H, m,  $2^{\text{Ph}}\text{-H}_2$ ), 7.14 – 7.10 (3H, m,  $2'\text{-H}_2$ ,  $4'''\text{-H}$ ), 6.94 (1H, d,  $J = 1.0$  Hz,  $5'''\text{-H}$ ), 5.13 (1H, s,  $2\text{-H}$ ), 3.81 – 3.70 (3H, m,  $2''\text{-HH}'$ ,  $\text{NCH}_2$ ), 3.77 (3H, s,  $\text{NCH}_3$ ), 3.68 – 3.60 (1H, m,  $2''\text{-HH}'$ ), 3.43 – 3.34 (2H, m,  $2''\text{-H}_2$ ), 2.55 – 2.45 (2H, m,  $3''\text{-H}_2(\text{HH}')$ ), 2.33 – 2.27 (1H, m,  $3''\text{-H}_2(\text{HH}')$ ), 2.23 – 2.16 (1H, m,  $3''\text{-H}_2(\text{HH}')$ );  $\delta_{\text{C}}$  (151 MHz,  $\text{CDCl}_3$ ) 170.0 ( $\text{C=O}$ ), 143.7 ( $\text{C-2}''''$ ), 138.7 ( $\text{C-1}^{\text{Ph}}$ ), 138.1 ( $\text{C-1}'$ ), 133.1 ( $\text{C-4}'$ ), 130.6 ( $\text{C-2}'$ ), 129.0 ( $\text{C-3}^{\text{Ph}}$ ), 128.8(2) (ArC), 128.7(8) (ArC), 127.5 (ArC), 123.7 ( $\text{C-4}''''$ ), 122.4 ( $\text{C-5}''''$ ), 54.4 ( $\text{C-2}$ ), 52.9 ( $\text{C-3}''$ ), 52.6 ( $\text{NCH}_2$ ), 52.5 ( $\text{C-3}''$ ), 45.8 ( $\text{C-2}''$ ), 42.1 ( $\text{C-2}''$ ), 33.9 ( $\text{NCH}_3$ );  $m/z$  (LCMS,  $\text{ESI}^+$ ) 409 ( $\text{M}^{(35}\text{Cl})\text{H}^+$ ), 411 ( $\text{M}^{(37}\text{Cl})\text{H}^+$ ); Accurate mass: Found  $\text{MH}^+$ , 409.1799:  $\text{C}_{23}\text{H}_{26}\text{N}_4\text{O}^{35}\text{Cl}$  requires  $M$ , 409.1795.

**N-(8''-Azabicyclo[3.2.1]octan-3''-yl)-2-(4'-chlorophenyl)-2-phenylacetamide S3**

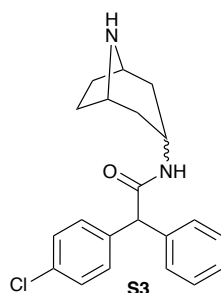

Obtained in 17% yield as a white solid. M.p. 189 – 191 °C (decomp.);  $\nu_{\text{max}}$  (ATR) 3278 (br), 3066 (w), 2958 (w), 2876 (w), 1644 (s), 1550 (m), 1490 (s), 1408 (w), 1312 (w), 1226 (w), 1162 (w), 1090 (m), 1015 (m)  $\text{cm}^{-1}$ ;  $\delta_{\text{H}}$  (600 MHz,  $\text{CDCl}_3$ ) 7.33 – 7.28 (2H, m,  $3^{\text{Ph}}\text{H}_2$ ), 7.28 – 7.23 (3H, m,  $3'\text{-H}_2$ ,  $4^{\text{Ph}}\text{-H}$ ), 7.20 – 7.17 (2H, m,  $2^{\text{Ph}}\text{-H}_2$ ), 7.17 – 7.15 (2H, m,  $2'\text{-H}_2$ ), 5.36 (1H, d,  $J = 8.5$  Hz,  $\text{NH}$ ), 4.79 (1H, s,  $2\text{-H}$ ), 4.21 (1H, tdt,  $J = 11.5$ , 8.5, 5.5 Hz,  $3''\text{-H}$ ), 3.53 – 3.49 (2H, m,  $1''\text{-H}_2$ ), 1.92 – 1.83 (2H, m,  $2''\text{-H}_2\text{H}'_2$ ), 1.78 – 1.73 (4H, m,  $6''\text{-(H}_2)_2$ ),

1.72 – 1.61 (1H, m, 8''-H), 1.29 – 1.21 (2H, m, 2''-H<sub>2</sub>H'<sub>2</sub>);  $\delta_c$  (151 MHz, CDCl<sub>3</sub>) 170.7 (C=O), 139.1 (C-1<sup>Ph</sup>), 138.1 (C-1'), 133.2 (C-4'), 130.3 (C-2'), 129.0 (C-3<sup>Ph</sup>), 128.9 (C-3'), 128.8 (C-2<sup>Ph</sup>), 127.6 (C-4<sup>Ph</sup>), 58.5 (C-2), 54.6 (C-1''), 42.1 (C-3''), 39.8(3) (C-2''), 39.8(1) (C-2''), 29.5 (C-6''); *m/z* (LCMS, ESI<sup>+</sup>) 355 (M(<sup>35</sup>Cl)H<sup>+</sup>), 357 (M(<sup>37</sup>Cl)H<sup>+</sup>); Accurate mass: Found MH<sup>+</sup>, 355.1563: C<sub>21</sub>H<sub>24</sub>N<sub>2</sub>O<sup>35</sup>Cl requires *M*, 355.1577.

*N*-(2''-[2'''-Dimethylaminoethyl]indazol-6''-yl)-2-(4'-chlorophenyl)-2-phenylacetamide **S4**

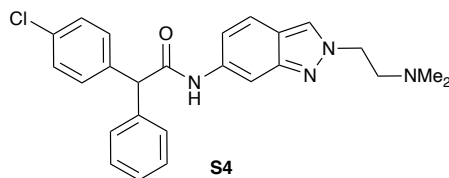

Obtained in 36% yield as a light brown solid. m.p. 76 – 79 °C;  $\nu_{\max}$  (ATR) 3292 (br), 3046 (w), 2950 (w), 2838 (w), 2790 (w), 1672 (m), 1569 (s), 1488 (s), 1368 (m), 1226 (m), 1148 (w), 1088 (w), 1014 (w) cm<sup>-1</sup>;  $\delta_H$  (600 MHz, CDCl<sub>3</sub>) 7.94 (1H, s, 3''-H), 7.93 (1H, br s, 7''-H), 7.55 (1H, d, *J* = 9.0 Hz, 4''-H), 7.40 – 7.36 (2H, m, 3<sup>Ph</sup>-H<sub>2</sub>), 7.35 – 7.31 (5H, m, 3'-H<sub>2</sub>, 2<sup>Ph</sup>-H<sub>2</sub>, 4<sup>Ph</sup>-H), 7.30 – 7.27 (2H, m, 2'-H<sub>2</sub>), 7.02 (1H, dd, *J* = 9.0, 2.0 Hz, 5''-H), 5.06 (1H, s, 2-H), 4.46 (2H, t, *J* = 6.5 Hz, 1'''-H<sub>2</sub>), 2.87 (2H, t, *J* = 6.5 Hz, 2'''-H<sub>2</sub>), 2.27 (6H, s, N(CH<sub>3</sub>)<sub>2</sub>);  $\delta_c$  (151 MHz, CDCl<sub>3</sub>) 169.6 (C=O), 148.9 (C-9''), 138.9 (C-1<sup>Ph</sup>), 137.8 (C-1'), 135.3 (C-6''), 133.5 (C-4'), 130.5 (C-2'), 129.3 (C-3<sup>Ph</sup>), 129.1 (C-3'), 129.0 (C-2<sup>Ph</sup>), 127.9 (C-4<sup>Ph</sup>), 123.5 (C-3''), 121.0 (C-4''), 119.5 (C-8''), 117.1 (C-5''), 106.7 (C-7''), 59.6 (C-2), 59.4 (C-2'''), 52.0 (C-1'''), 45.8 (N(CH<sub>3</sub>)<sub>2</sub>); *m/z* (LCMS, ESI<sup>+</sup>) 433 (M(<sup>35</sup>Cl)H<sup>+</sup>), 435 (M(<sup>37</sup>Cl)H<sup>+</sup>); Accurate mass: Found MH<sup>+</sup>, 433.1783: C<sub>25</sub>H<sub>26</sub>N<sub>4</sub>O<sup>35</sup>Cl requires *M*, 433.1795.

*N*-(2''-[4'''-Methylpiperazin-1'''-yl]pyrimidin-5''-yl)-2-(4'-chlorophenyl)-2-phenylacetamide **S5**

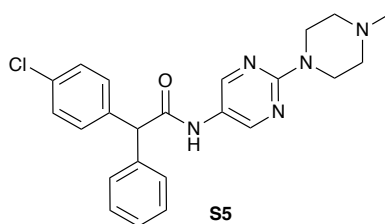

Obtained in 36% yield as an off-white solid. M.p. 152 – 154 °C;  $\nu_{\max}$  (ATR) 3270 (br), 2942 (w), 2846 (w), 2800 (w), 1655 (m), 1606 (m), 1498 (br, s), 1447 (m), 1407 (m), 1360 (s), 1300 (m), 1261 (m), 1170 (w), 1096 (w) cm<sup>-1</sup>;  $\delta_H$  (600 MHz, CDCl<sub>3</sub>) 8.37 (2H, s, 4''-H<sub>2</sub>), 7.39 – 7.35 (2H, m, 3<sup>Ph</sup>-H<sub>2</sub>), 7.34 – 7.31 (3H, m, 3'-H<sub>2</sub>, 4<sup>Ph</sup>-H), 7.31 – 7.28 (2H, m, 2<sup>Ph</sup>-H<sub>2</sub>), 7.26 – 7.23 (2H, m, 2'-H<sub>2</sub>), 7.01 (1H, s, NH), 5.01 (1H, s, 2-H), 3.80 (4H, t, *J* = 5.0 Hz, 2'''-(H<sub>2</sub>)<sub>2</sub>), 2.43 (4H, t, *J* = 5.0 Hz, 3'''-(H<sub>2</sub>)<sub>2</sub>), 2.32 (3H, s, NCH<sub>3</sub>);  $\delta_c$  (151 MHz, CDCl<sub>3</sub>) 170.2 (C=O), 159.7 (C-2''), 151.6 (C-4''), 138.6 (C-1<sup>Ph</sup>), 137.5 (C-1'), 133.7 (C-4'), 130.4 (C-2'), 129.3 (C-3<sup>Ph</sup>), 129.2 (C-3'), 128.9 (C-2<sup>Ph</sup>), 128.0 (C-4<sup>Ph</sup>), 122.3 (C-5''), 58.8 (C-2), 55.0 (C-3'''), 46.4 (NCH<sub>3</sub>), 44.2 (C-2'''); *m/z* (LCMS, ESI<sup>+</sup>) 422 (M(<sup>35</sup>Cl)H<sup>+</sup>), 424 (M(<sup>37</sup>Cl)H<sup>+</sup>); Accurate mass: Found MH<sup>+</sup>, 422.1757: C<sub>23</sub>H<sub>25</sub>N<sub>5</sub>O<sup>35</sup>Cl requires *M*, 422.1748.

*N*-([1''H-imidazol-2''-yl]methyl)-2-(4'-chlorophenyl)-2-phenylacetamide **S6**

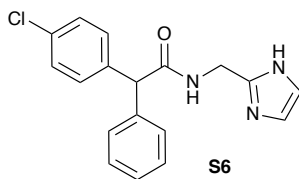

Obtained in 25% yield as a beige solid. M.p. 127 – 130 °C;  $\nu_{\max}$  (ATR) 3232 (br), 3032 (w), 2930 (w), 1656 (s), 1558 (w), 1490 (s), 1420 (w), 1133 (s), 1091 (s), 1015 (m)  $\text{cm}^{-1}$ ;  $\delta_{\text{H}}$  (600 MHz,  $\text{CDCl}_3$ ) 9.14 – 9.08 (1H, m, NH), 7.26 – 7.23 (3H, m, 3<sup>Ph</sup>-H<sub>2</sub>, 4<sup>Ph</sup>-H), 7.22 – 7.19 (2H, m, 3'-H<sub>2</sub>), 7.11 – 7.07 (2H, m, 2<sup>Ph</sup>-H<sub>2</sub>), 7.07 – 7.04 (2H, m, 2'-H<sub>2</sub>), 6.89 (2H, s, 4''-(H)<sub>2</sub>), 4.83 (1H, s, 2-H), 4.46 (2H, d,  $J = 6.0$  Hz, NHCH<sub>2</sub>);  $\delta_{\text{C}}$  (151 MHz,  $\text{CDCl}_3$ ) 174.3 (C=O), 145.2 (C-2''), 138.6 (C-1<sup>Ph</sup>), 137.4 (C-1'), 133.4 (C-4'), 130.2 (C-2'), 128.9(1) (C-3<sup>Ph</sup>), 128.8(8) (C-3'), 128.7 (C-2<sup>Ph</sup>), 127.7 (C-4<sup>Ph</sup>), 120.4 (C-4''), 57.2 (C-2), 35.9 (NHCH<sub>2</sub>);  $m/z$  (LCMS, ESI<sup>+</sup>) 326 (M(<sup>35</sup>Cl)H<sup>+</sup>), 328 (M(<sup>37</sup>Cl)H<sup>+</sup>); Accurate mass: Found MH<sup>+</sup>, 326.1050: C<sub>18</sub>H<sub>17</sub>N<sub>3</sub>O<sup>35</sup>Cl requires  $M$ , 326.1060.

*N*-([Benzothiazol-2''-yl]methyl)-2-(4'-chlorophenyl)-2-phenylacetamide **S7**

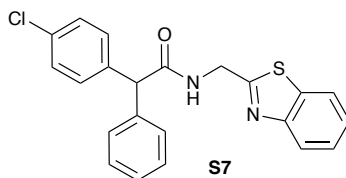

Obtained in 23% yield as a beige solid. M.p. 161 – 163 °C;  $\nu_{\max}$  (ATR) 3294 (br), 3062 (w), 3018 (w), 1654 (s), 1528 (m), 1489 (s), 1412 (w), 1334 (w), 1218 (w), 1156 (w), 1090 (m), 1015 (m)  $\text{cm}^{-1}$ ;  $\delta_{\text{H}}$  (600 MHz,  $\text{CHCl}_3$ ) 7.94 (1H, d,  $J = 8.0$  Hz, 7''-H), 7.85 (1H, d,  $J = 8.0$  Hz, 4''-H), 7.47 (1H, t,  $J = 8.0$  Hz, 5''-H), 7.39 (1H, t,  $J = 8.0$  Hz, 6''-H), 7.37 – 7.30 (2H, m, 3<sup>Ph</sup>-H<sub>2</sub>), 7.33 – 7.26 (5H, m, 3'-H<sub>2</sub>, 2<sup>Ph</sup>-H<sub>2</sub>, 4<sup>Ph</sup>-H), 7.28 – 7.22 (2H, m, 2'-H<sub>2</sub>), 6.59 (1H, t,  $J = 6.0$  Hz, NH), 4.98 (1H, s, 2-H), 4.89 – 4.85 (2H, m, NHCH<sub>2</sub>);  $\delta_{\text{C}}$  (151 MHz,  $\text{CDCl}_3$ ) 171.8 (C=O), 167.9 (C-2''), 152.8 (C-8''), 138.7 (C-1<sup>Ph</sup>), 137.7 (C-1'), 135.3 (C-9''), 133.5 (C-4'), 130.5 (C-2'), 129.2 (C-3<sup>Ph</sup>), 129.1 (ArC), 129.0 (ArC), 127.8 (C-4<sup>Ph</sup>), 126.4 (C-5''), 125.5 (C-6''), 123.0 (C-7''), 121.9 (C-4''), 58.4 (C-2), 42.3 (NHCH<sub>2</sub>);  $m/z$  (LCMS, ESI<sup>+</sup>) 393 (M(<sup>35</sup>Cl)H<sup>+</sup>), 395 (M(<sup>37</sup>Cl)H<sup>+</sup>); Accurate mass: Found MH<sup>+</sup>, 393.0827: C<sub>22</sub>H<sub>18</sub>N<sub>2</sub>OS<sup>35</sup>Cl requires  $M$ , 393.0828.

*N*-([3''-[Imidazol-1'''-yl]prop-1''-yl]-2-(4'-chlorophenyl)-2-phenylacetamide **S8**

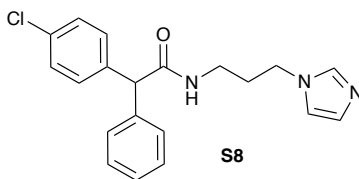

Obtained in 42% yield as a white solid. M.p. 116 – 118 °C;  $\nu_{\max}$  (ATR) 3312 (br), 3044 (w), 2952 (w), 1650 (s), 1560 (m), 1489 (s), 1458 (w), 1352 (w), 1226 (m), 1098 (w)  $\text{cm}^{-1}$ ;  $\delta_{\text{H}}$  (700 MHz,  $\text{CDCl}_3$ ) 7.58 (1H, s, 2''-

**H**), 7.32 (2H, t,  $J = 7.5$  Hz,  $3^{\text{Ph}}\text{-H}_2$ ), 7.28 (2H, d,  $J = 8.0$  Hz,  $3'\text{-H}_2$ ), 7.26 – 7.23 (3H, m,  $2^{\text{Ph}}\text{-H}_2$ ,  $4^{\text{Ph}}\text{-H}$ ), 7.20 (2H, d,  $J = 8.0$  Hz,  $2'\text{-H}_2$ ), 7.02 (1H, apparent s,  $4'''\text{-H}$ ), 6.89 (1H, apparent s,  $5'''\text{-H}$ ), 6.31 (1H, t,  $J = 6.5$  Hz, **NH**), 4.86 (1H, s, **2-H**), 3.93 (2H, t,  $J = 7.0$  Hz,  $3''\text{-H}_2$ ), 3.25 (2H, q,  $J = 6.5$  Hz,  $1''\text{-H}_2$ ), 1.97 (2H, tt,  $J = 7.0, 6.5$  Hz,  $2''\text{-H}_2$ );  $\delta_{\text{C}}$  (176 MHz,  $\text{CDCl}_3$ ) 172.2 (**C=O**), 139.1 (**C-1<sup>Ph</sup>**), 137.9 (**C-1'**), 137.1 (**C-2'''**), 133.3 (**C-4'**), 130.3 (**C-2'**), 129.1 (**C-3<sup>Ph</sup>**), 129.0 (**C-3'**), 128.8 (**C-2<sup>Ph</sup>**), 128.7 (**C-4'''**), 119.2 (**C-5'''**), 58.2 (**C-2**), 44.9 (**C-3''**), 37.0 (**C-1''**), 31.0 (**C-2''**);  $m/z$  (LCMS,  $\text{ESI}^+$ ) 354 ( $\text{M}^{(35}\text{Cl})\text{H}^+$ ), 356 ( $\text{M}^{(37}\text{Cl})\text{H}^+$ ); Accurate mass: Found  $\text{MH}^+$ , 354.1383:  $\text{C}_{20}\text{H}_{21}\text{N}_3\text{O}^{35}\text{Cl}$  requires  $M$ , 354.1373.

*N-([N-Methylpyrazol-5''-yl]methyl)-2-(4'-chlorophenyl)-2-phenylacetamide S9*

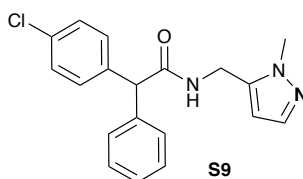

Obtained in 37% yield as a white solid. M.p. 148 – 150 °C;  $\nu_{\text{max}}$  (ATR) 3274 (br), 3030 (w), 2934 (w), 1648 (s), 1544 (m), 1490 (s), 1400 (w), 1344 (w), 1280 (w), 1218 (w), 1090 (m), 1015 (m)  $\text{cm}^{-1}$ ;  $\delta_{\text{H}}$  (700 MHz,  $\text{CDCl}_3$ ) 7.37 (1H, d,  $J = 2.0$  Hz,  $3''\text{-H}$ ), 7.36 – 7.33 (2H, m,  $3^{\text{Ph}}\text{-H}_2$ ), 7.31 – 7.27 (3H, m,  $3'\text{-H}_2$ ,  $4^{\text{Ph}}\text{-H}$ ), 7.24 – 7.22 (2H, m,  $2^{\text{Ph}}\text{-H}_2$ ), 7.21 – 7.18 (2H, m,  $2'\text{-H}_2$ ), 6.05 (1H, d,  $J = 2.0$  Hz,  $4''\text{-H}$ ), 5.79 (1H, t,  $J = 5.5$  Hz, **N-H**), 4.87 (1H, s, **2-H**), 4.52 (2H, d,  $J = 5.5$  Hz,  $\text{NHCH}_2$ ), 3.77 (3H, s,  $\text{NCH}_3$ );  $\delta_{\text{C}}$  (101 MHz,  $\text{CDCl}_3$ ) 171.4 (**C=O**), 138.6(3) (**ArC**), 138.5(9) (**ArC**), 138.4 (**C-3''**), 137.6 (**C-1'**), 133.5 (**C-4'**), 130.3 (**C-2'**), 129.1 (**ArC**), 129.0 (**ArC**), 128.7 (**C-2<sup>Ph</sup>**), 127.9 (**C-4<sup>Ph</sup>**), 105.8 (**C-4''**), 58.3 (**C-2**), 36.6 ( $\text{NCH}_3$ ), 34.6 ( $\text{NHCH}_2$ );  $m/z$  (LCMS,  $\text{ESI}^+$ ) 340 ( $\text{M}^{(35}\text{Cl})\text{H}^+$ ), 342 ( $\text{M}^{(37}\text{Cl})\text{H}^+$ ); Accurate mass: Found  $\text{MH}^+$ , 340.1226:  $\text{C}_{19}\text{H}_{19}\text{N}_3\text{O}^{35}\text{Cl}$  requires  $M$ , 340.1217.

*N-Methyl-N-([2''-methyloxazol-4''-yl]methyl)-2-(4'-chlorophenyl)-2-phenylacetamide S10*

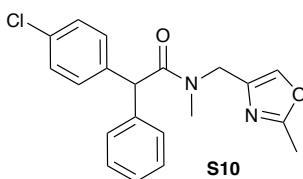

Obtained in 49% yield as a yellow oil.  $\nu_{\text{max}}$  (ATR) 3050 (w), 2928 (w), 1643 (s), 1580 (m), 1489 (s), 1397 (m), 1278 (w), 1204 (w), 1089 (s), 1015 (m)  $\text{cm}^{-1}$ ;  $\delta_{\text{H}}$  (600 MHz,  $\text{CDCl}_3$ , mixture of rotamers) 7.42 (0.6H, s,  $5''\text{-H}$  rotamer B), 7.32 – 7.28 (2H, m,  $3^{\text{Ph}}\text{-H}_2$ ), 7.27 – 7.23 (4.2H, m,  $3'\text{-H}_2$ ,  $2^{\text{Ph}}\text{-H}_2$  rotamer A,  $4^{\text{Ph}}\text{-H}$ ,  $5''\text{-H}$  rotamer A), 7.21 – 7.18 (2H, m,  $2'\text{-H}_2$  rotamer A,  $2^{\text{Ph}}\text{-H}_2$  rotamer B), 7.15 – 7.12 (1.2H, m,  $2'\text{-H}_2$ , rotamer B), 5.49 (0.4H, s,  $2\text{-H}$  rotamer A), 5.15 (0.6H, s,  $2\text{-H}$  rotamer B), 4.45 (1.2H, s,  $\text{N}(\text{CH}_3)\text{CH}_2$  rotamer B), 4.36 (0.4H, d,  $J = 17.0$  Hz,  $\text{N}(\text{CH}_3)\text{CHH}'$  rotamer A), 4.21 (0.4H, d,  $J = 17.0$  Hz,  $\text{N}(\text{CH}_3)\text{HH}'$  rotamer A), 3.05 (1.8H, s,  $\text{N}(\text{CH}_3)\text{CH}_2$  rotamer B), 3.00 (1.2H, s,  $\text{N}(\text{CH}_3)\text{CHH}'$  rotamer A), 2.46 (1.2H, s,  $2''\text{-CH}_3$  rotamer A), 2.41 (1.8H, s,  $2''\text{-CH}_3$  rotamer B);  $\delta_{\text{C}}$  (151 MHz,  $\text{CDCl}_3$ , mixture of rotamers) 171.8 (**C=O** rotamer A), 171.4 (**C=O**

rotamer B), 162.5 (C-2'' rotamer A), 161.5 (C-2'' rotamer B), 139.1 (C-1<sup>Ph</sup> rotamer A), 138.9 (C-1<sup>Ph</sup> rotamer B), 138.5 (C-1' rotamer A), 138.2 (C-1' rotamer B), 137.0 (C-4'' rotamer A), 136.8 (C-4'' rotamer B), 136.2 (C-5'' rotamer B), 135.1 (C-5'' rotamer A), 133.0(4) (C-4' rotamer B), 133.0(1) (C-4' rotamer A), 130.7 (C-2' rotamer A), 130.6 (C-2' rotamer B), 129.0 (ArC), 128.9(1) (ArC), 128.8(8) (ArC), 128.8(6) (ArC), 128.7(1) (ArC), 128.6(5) (ArC), 127.4(1) (C-4<sup>Ph</sup> rotamer A), 127.3(8) (C-4<sup>Ph</sup> rotamer B), 54.3 (C-2 rotamer B), 53.8 (C-2 rotamer A), 46.1 (N(CH<sub>3</sub>)CHH' rotamer A), 44.0 (N(CH<sub>3</sub>)CH<sub>2</sub> rotamer B), 36.2 (N(CH<sub>3</sub>)CH<sub>2</sub> rotamer B), 34.3 (N(CH<sub>3</sub>)CHH' rotamer A), 14.1 (2''-CH<sub>3</sub> rotamer A), 14.0 (2''-CH<sub>3</sub> rotamer B); *m/z* (LCMS, ESI<sup>+</sup>) 355 (M(<sup>35</sup>Cl)H<sup>+</sup>), 357 (M(<sup>37</sup>Cl)H<sup>+</sup>); Accurate mass: Found MH<sup>+</sup>, 355.1220: C<sub>20</sub>H<sub>20</sub>N<sub>2</sub>O<sub>2</sub><sup>35</sup>Cl requires *M*, 355.1213.

*N*-([Pyridin-2''-yl]methyl)-2-(4'-chlorophenyl)-2-phenylacetamide **S11**

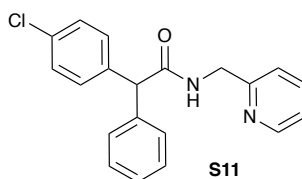

Obtained in 70% yield as a white solid. M.p. 119 – 120 °C;  $\nu_{\max}$  (ATR) 3308 (br), 3056 (w), 2930 (w), 1649 (s), 1600 (w), 1591 (m), 1490 (s), 1437 (w), 1204 (w), 1091 (m), 1016 (m) cm<sup>-1</sup>;  $\delta_{\text{H}}$  (700 MHz, CDCl<sub>3</sub>) 8.48 – 8.46 (1H, m, 6''-H), 7.64 (1H, td, *J* = 7.5, 2.0 Hz, 5''-H), 7.35 – 7.31 (2H, m, 3<sup>Ph</sup>-H<sub>2</sub>), 7.30 – 7.26 (5H, m, 3'-H<sub>2</sub>, 2<sup>Ph</sup>-H<sub>2</sub>, 4<sup>Ph</sup>-H), 7.26 – 7.24 (2H, m, 2'-H<sub>2</sub>), 7.23 – 7.21 (1H, m, 3''-H), 7.20 – 7.16 (1H, m, 4''-H), 6.97 – 6.92 (1H, m, N-H), 4.96 (1H, s, 2-H), 4.59 (2H, d, *J* = 5.0 Hz, NHCH<sub>2</sub>);  $\delta_{\text{C}}$  (176 MHz, CDCl<sub>3</sub>) 171.6 (C=O), 156.1 (C-2''), 149.1 (C-6''), 139.2 (C-1<sup>Ph</sup>), 138.2 (C-1'), 136.9 (C-5''), 133.2 (C-4'), 130.4 (C-2'), 129.0 (C-3<sup>Ph</sup>), 128.9(3) (ArC), 128.9(1) (ArC), 127.6 (C-4<sup>Ph</sup>), 122.6 (C-4''), 122.2 (C-3''), 58.5 (C-2), 44.8 (NHCH<sub>2</sub>); *m/z* (LCMS, ESI<sup>+</sup>) 337 (M(<sup>35</sup>Cl)H<sup>+</sup>), 339 (M(<sup>37</sup>Cl)H<sup>+</sup>); Accurate mass: Found MH<sup>+</sup>, 337.1111: C<sub>20</sub>H<sub>18</sub>N<sub>2</sub>O<sup>35</sup>Cl requires *M*, 337.1108.

*N*-([Azetidin-3''-yl]methyl)-2-(4'-chlorophenyl)-2-phenylacetamide **S12**

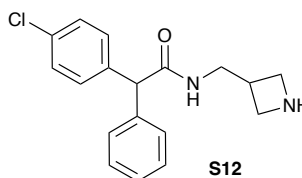

Obtained in 10% yield as a yellow solid. M.p. 102 – 105 °C;  $\nu_{\max}$  (ATR) 3284 (br), 3066 (w), 2956 (w), 2924 (w), 2866 (w), 1649 (s), 1555 (m), 1490 (s), 1364 (w), 1226 (w), 1098 (w), 1018 (w) cm<sup>-1</sup>;  $\delta_{\text{H}}$  (700 MHz, CDCl<sub>3</sub>) 7.35 – 7.30 (2H, m, 3<sup>Ph</sup>-H<sub>2</sub>), 7.30 – 7.26 (3H, m, 3'-H<sub>2</sub>, 4<sup>Ph</sup>-H), 7.25 – 7.22 (2H, m, 2<sup>Ph</sup>-H<sub>2</sub>), 7.22 – 7.19 (2H, m, 2'-H<sub>2</sub>), 6.21 – 6.13 (1H, m, NH), 4.88 (1H, s, 2-H), 3.72 – 3.63 (2H, m, 2''-H<sub>2</sub>H'<sub>2</sub>), 3.47 (2H, t, *J* = 6.0 Hz, NHCH<sub>2</sub>), 3.29 – 3.20 (2H, m, 2''-H<sub>2</sub>H'<sub>2</sub>), 2.86 – 2.78 (1H, m, 3''-H), 2.04 – 1.87 (1H, m, 1''-H);  $\delta_{\text{C}}$  (176 MHz, CDCl<sub>3</sub>) 172.0 (C=O), 139.2 (C-1<sup>Ph</sup>), 138.1 (C-1'), 133.3 (C-4'), 130.4 (C-2'), 129.0 (C-3<sup>Ph</sup>), 128.9 (C-3'), 128.8



(C-2<sup>Ph</sup>), 127.6 (C-4<sup>Ph</sup>), 58.6 (C-2), 50.9 (C-2''), 43.0 (NHCH<sub>2</sub>), 34.5 (C-3''); *m/z* (LCMS, ESI<sup>+</sup>) 315 (M(<sup>35</sup>Cl)H<sup>+</sup>), 317 (M(<sup>37</sup>Cl)H<sup>+</sup>); Accurate mass: Found MH<sup>+</sup>, 315.1257: C<sub>18</sub>H<sub>20</sub>N<sub>2</sub>O<sup>35</sup>Cl requires *M*, 315.1264.

**1-(2'',6''-Diazaspiro[3.3]heptan-2''-yl)-2-(4'-chlorophenyl)-2-phenylethan-1-one S13**

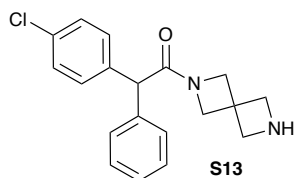

Obtained in 38% yield as a white crystalline solid. M.p. 90 – 92 °C;  $\nu_{\max}$  (ATR) 2942 (w), 2866 (w), 1645 (s), 1490 (m), 1437 (s), 1326 (w), 1290 (w), 1152 (w), 1092 (w), 1015 (w) cm<sup>-1</sup>;  $\delta_{\text{H}}$  (700 MHz, CDCl<sub>3</sub>) 7.33 – 7.29 (2H, m, 3<sup>Ph</sup>-H<sub>2</sub>), 7.28 – 7.25 (5H, m, 3'-H<sub>2</sub>, 2<sup>Ph</sup>-H<sub>2</sub>, 4<sup>Ph</sup>-H), 7.24 – 7.21 (2H, m, 2'-H<sub>2</sub>), 4.77 (1H, s, 2-H), 4.22 (1H, d, *J* = 9.0 Hz, 1''-(HH')(H<sub>2</sub>)), 4.15 (1H, d, *J* = 9.0 Hz, 1''-(HH')(H<sub>2</sub>)), 4.11 (2H, s, 1''-(HH')H<sub>2</sub>), 3.77 (1H, d, *J* = 8.5 Hz, 5''-(HH')(HH')), 3.75 (1H, d, *J* = 8.5 Hz, 5''-(HH')(HH')), 3.68 (1H, d, *J* = 8.5 Hz, 5''-(HH')(HH')), 3.65 (1H, d, *J* = 8.5 Hz, 5''-(HH')(HH'));  $\delta_{\text{C}}$  (176 MHz, CDCl<sub>3</sub>) 171.0 (C=O), 138.6 (C-1<sup>Ph</sup>), 137.6 (C-1'), 133.2 (C-4'), 130.4 (C-2'), 128.9 (C-3<sup>Ph</sup>), 128.7(9) (ArC), 128.7(7) (ArC), 127.5 (C-4<sup>Ph</sup>), 61.5 (C-1''), 58.6 (C-1''), 57.6(4) (AlC), 57.5(5) (AlC), 52.9 (C-2), 37.4 (C-4''); *m/z* (LCMS, ESI<sup>+</sup>) 327 (M(<sup>35</sup>Cl)H<sup>+</sup>), 329 (M(<sup>37</sup>Cl)H<sup>+</sup>); Accurate mass: Found MH<sup>+</sup>, 327.1248: C<sub>19</sub>H<sub>20</sub>N<sub>2</sub>O<sup>35</sup>Cl requires *M*, 327.1264.

**N-(3''-[Pyrrolidin-1'''-yl]prop-1''-yl)-2-(4'-chlorophenyl)-2-phenylacetamide S14**

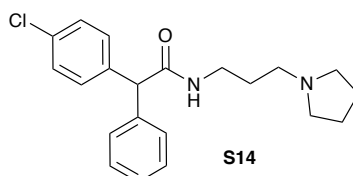

Obtained in 41% yield as a yellow oil.  $\nu_{\max}$  (ATR) 3278 (br), 3064 (w), 2968 (w), 2930 (w), 2880 (w), 2788 (w), 1654 (s), 1548 (m), 1494 (s), 1452 (w), 1352 (w), 1222 (w), 1176 (w), 1096 (w), 1015 (w) cm<sup>-1</sup>;  $\delta_{\text{H}}$  (700 MHz, CDCl<sub>3</sub>) 7.45 – 7.41 (1H, m, NH), 7.34 – 7.30 (2H, m, ArH), 7.29 – 7.26 (4H, m, ArH), 7.26 – 7.23 (3H, m, ArH), 4.81 (1H, s, 2-H), 3.42 – 3.38 (2H, m, 1''-H<sub>2</sub>), 2.61 (2H, t, *J* = 6.5 Hz, 3''-H<sub>2</sub>), 2.60 – 2.54 (4H, m, 2'''-(H<sub>2</sub>)<sub>2</sub>), 1.79 – 1.72 (6H, m, 2''-H<sub>2</sub>, 3'''-(H<sub>2</sub>)<sub>2</sub>);  $\delta_{\text{C}}$  (176 MHz, CDCl<sub>3</sub>) 171.8 (C=O), 139.5 (ArC), 138.4 (ArC), 133.1 (C-4'), 130.4 (ArC), 128.9 (ArC), 128.8(4) (ArC), 128.8(1) (ArC), 127.4 (ArC), 58.6 (C-2), 54.8 (C-3''), 54.1 (C-2'''), 39.3 (C-1''), 26.6 (C-2''), 23.5 (C-3'''); *m/z* (LCMS, ESI<sup>+</sup>) 357 (M(<sup>35</sup>Cl)H<sup>+</sup>), 358 (M(<sup>37</sup>Cl)H<sup>+</sup>); Accurate mass: Found MH<sup>+</sup>, 357.1741: C<sub>21</sub>H<sub>26</sub>N<sub>2</sub>O<sup>35</sup>Cl requires *M*, 357.1734.

*N*-(3''-[Morpholin-4'''-yl]prop-1''-yl)-2-(4'-chlorophenyl)-2-phenylacetamide **S15**

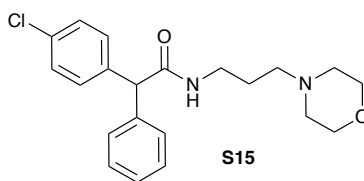

Obtained in 47% yield as a white solid. m.p. 129 – 131 °C;  $\nu_{\max}$  (ATR) 3290 (br), 3054 (w), 2942 (w), 2852 (w), 2808 (w), 1645 (s), 1544 (m), 1489 (s), 1456 (w), 1356 (w), 1276 (w), 1222 (w), 1117 (s), 1090 (w), 1015 (m)  $\text{cm}^{-1}$ ;  $\delta_{\text{H}}$  (700 MHz,  $\text{CDCl}_3$ ) 7.34 – 7.30 (2H, m, 3<sup>Ph</sup>-H<sub>2</sub>), 7.29 – 7.26 (3H, m, 3'-H<sub>2</sub>, 4<sup>Ph</sup>-H), 7.26 – 7.24 (2H, m, 2<sup>Ph</sup>-H<sub>2</sub>), 7.22 – 7.19 (2H, m, 2'-H<sub>2</sub>), 6.82 (1H, t,  $J = 5.0$  Hz, NH), 4.80 (1H, s, 2-H), 3.60 – 3.53 (4H, m, 2'''-(H<sub>2</sub>)<sub>2</sub>), 3.43 – 3.33 (2H, m, 1''-H<sub>2</sub>), 2.36 (2H, t,  $J = 6.5$  Hz, 3''-H<sub>2</sub>), 2.38 – 2.29 (4H, m, 3'''-(H<sub>2</sub>)<sub>2</sub>), 1.65 (2H, p,  $J = 6.5$  Hz, 2''-H<sub>2</sub>);  $\delta_{\text{C}}$  (176 MHz,  $\text{CDCl}_3$ ) 171.3 (C=O), 139.4 (C-1<sup>Ph</sup>), 138.3 (C-1'), 133.2 (C-4'), 130.3 (C-2'), 129.0 (C-3<sup>Ph</sup>), 128.9 (C-3'), 128.8 (C-2<sup>Ph</sup>), 127.6 (C-4<sup>Ph</sup>), 67.1 (C-2'''), 58.7 (C-2), 57.6 (C-3''), 53.8 (C-3'''), 39.6 (C-1''), 25.0 (C-2'');  $m/z$  (LCMS, ESI<sup>+</sup>) 373 (M(<sup>35</sup>Cl)H<sup>+</sup>), 375 (M(<sup>37</sup>Cl)H<sup>+</sup>); Accurate mass: Found MH<sup>+</sup>, 373.1675: C<sub>21</sub>H<sub>26</sub>N<sub>2</sub>O<sub>2</sub><sup>35</sup>Cl requires  $M$ , 373.1683.

*N*-(2''-[4'''-Methylpiperazin-1'''-yl]eth-1''-yl)-2-(4'-chlorophenyl)-2-phenylacetamide **S16**

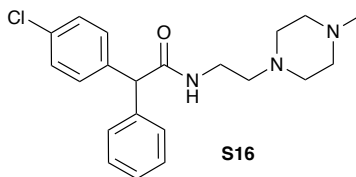

Obtained in 39% yield as a pale yellow oil.  $\nu_{\max}$  (ATR) 3308 (br), 2934 (w), 2800 (w), 1651 (s), 1544 (w), 1491 (s), 1456 (w), 1288 (w), 1176 (w), 1096 (w), 1015 (m)  $\text{cm}^{-1}$ ;  $\delta_{\text{H}}$  (700 MHz,  $\text{CDCl}_3$ ) 7.36 – 7.32 (2H, m, 3<sup>Ph</sup>-H<sub>2</sub>), 7.31 – 7.26 (3H, m, 3'-H<sub>2</sub>, 4<sup>Ph</sup>-H), 7.25 – 7.23 (2H, m, 2<sup>Ph</sup>-H<sub>2</sub>), 7.22 – 7.20 (2H, m, 2'-H<sub>2</sub>), 6.28 – 6.18 (1H, m, NH), 4.90 (1H, s, 2-H), 3.40 – 3.31 (2H, m, 1''-H<sub>2</sub>), 2.55 – 2.11 (8H, m, 2'''-(H<sub>2</sub>)<sub>2</sub>, 3'''-(H<sub>2</sub>)<sub>2</sub>), 2.44 (2H, t,  $J = 6.0$  Hz, 2''-H<sub>2</sub>), 2.27 (3H, s, NCH<sub>3</sub>);  $\delta_{\text{C}}$  (176 MHz,  $\text{CDCl}_3$ ) 171.5 (C=O), 139.4 (C-1<sup>Ph</sup>), 138.3 (C-1'), 133.2 (C-4'), 130.5 (C-2'), 129.0(3) (ArC), 128.9(90) (ArC), 128.9(85) (ArC), 127.6 (C-4<sup>Ph</sup>), 58.8 (C-2), 56.0 (C-2''), 55.1 (C-3'''), 52.6 (C-2'''), 46.1 (NCH<sub>3</sub>), 36.3 (C-1'');  $m/z$  (LCMS, ESI<sup>+</sup>) 372 (M(<sup>35</sup>Cl)H<sup>+</sup>), 374 (M(<sup>37</sup>Cl)H<sup>+</sup>); Accurate mass: Found MH<sup>+</sup>, 372.1836: C<sub>21</sub>H<sub>27</sub>N<sub>3</sub>O<sup>35</sup>Cl requires  $M$ , 372.1843.

*N*-(3''-[2'''-Pyrrolidinon-1'''-yl]prop-1''-yl)-2-(4'-chlorophenyl)-2-phenylacetamide **S17**

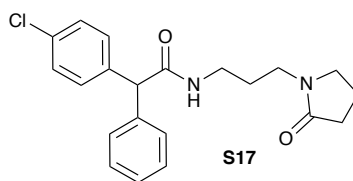

Obtained in 51% yield as a colourless oil.  $\nu_{\max}$  (ATR) 3282 (br), 3052 (w), 2963 (w), 2934 (w), 2880 (w), 1655 (br, s), 1545 (w), 1490 (m), 1428 (w), 1291 (w), 1222 (w), 1089 (w)  $\text{cm}^{-1}$ ;  $\delta_{\text{H}}$  (400 MHz,  $\text{CDCl}_3$ ) 7.33 – 7.21 (9H, m, ArH), 7.08 – 7.00 (1H, m, NH), 4.82 (1H, s, 2-H), 3.33 (2H, apparent ddd,  $J = 8.5, 7.0, 1.5$  Hz, 5'''- $\text{H}_2$ ), 3.23 – 3.16 (4H, m, 1''- $\text{H}_2$ , 3''- $\text{H}_2$ ), 2.34 (2H, t,  $J = 8.0$  Hz, 3'''- $\text{H}_2$ ), 1.98 (2H, apparent pd,  $J = 7.5, 2.0$  Hz, 4'''- $\text{H}_2$ ), 1.64 (2H, p,  $J = 6.0$  Hz, 2''- $\text{H}_2$ );  $\delta_{\text{C}}$  (101 MHz,  $\text{CDCl}_3$ ) 176.1 (C-2'''), 171.6 (C=O), 139.4 (C-1<sup>Ph</sup>), 138.3 (C-1'), 133.0 (C-4'), 130.3 (ArC), 128.8 (ArC), 128.7 (ArC), 127.3 (ArC), 58.3 (C-2), 47.5 (C-5'''), 39.6 (AlC), 36.1 (AlC), 31.0 (C-3'''), 26.5 (C-2''), 18.0 (C-4''');  $m/z$  (LCMS, ESI<sup>+</sup>) 371 (M(<sup>35</sup>Cl)H<sup>+</sup>), 373 (M(<sup>37</sup>Cl)H<sup>+</sup>); Accurate mass: Found MH<sup>+</sup>, 371.1516:  $\text{C}_{21}\text{H}_{24}\text{N}_2\text{O}_2^{35}\text{Cl}$  requires  $M$ , 371.1526.

*N*-(1'',2''-Diphenylethyl)-2-(pyrrolidin-2'-yl)acetamide **S18**

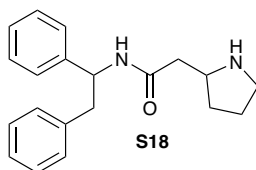

Obtained in 52% yield as a yellow oil.  $\nu_{\max}$  (ATR) 3270 (br), 3094 (w), 3022 (w), 2918 (w), 1670 (s), 1544 (m), 1496 (w), 1199 (s), 1177 (s), 1129 (s), 1028 (w)  $\text{cm}^{-1}$ ;  $\delta_{\text{H}}$  (700 MHz,  $\text{CDCl}_3$ , mixture of diastereomers) 8.20 (0.5H, d,  $J = 8.0$  Hz, 1-NH isomer A), 7.88 (0.5H, d,  $J = 8.0$  Hz, 1-NH isomer B), 7.29 – 7.15 (8H, m, ArH), 7.13 (1H, d,  $J = 7.5$  Hz, 2<sup>Ph</sup>- $\text{H}_2$  isomer A), 7.09 (1H, d,  $J = 7.0$  Hz, 2<sup>Ph</sup>- $\text{H}_2$  isomer B), 5.19 (0.5H, q,  $J = 8.0$  Hz, 1''-H isomer A), 5.10 (0.5H, td,  $J = 8.0, 6.5$  Hz, 1''-H isomer B), 3.61 – 3.53 (1H, m, 2'-H), 3.10 – 3.03 (1H, m, 5'-HH'), 3.05 (1H, d,  $J = 8.0$  Hz, 2''- $\text{H}_2$  isomer A), 3.02 (0.5H, d,  $J = 6.5$  Hz, 2''-HH' isomer B), 3.02 (0.5H, d,  $J = 8.0$  Hz, 2''-HH' isomer B), 3.00 – 2.95 (1H, m, 5'-HH'), 2.77 (0.5H, dd,  $J = 15.5, 7.5$  Hz, 2-HH' isomer B), 2.68 (0.5H, dd,  $J = 15.0, 7.0$  Hz, 2-HH' isomer A), 2.51 (0.5H, dd,  $J = 15.0, 5.0$  Hz, 2-HH' isomer A), 2.49 (0.5H, dd,  $J = 15.5, 5.0$  Hz, 2-HH' isomer B), 1.94 – 1.83 (2H, m, 4'-HH' isomer A, 4'-HH' isomer B, 3'-HH' isomer A, 3'-HH' isomer B), 1.81 – 1.72 (1H, m, 4'-HH' isomer A, 4'-HH' isomer B), 1.49 (0.5H, dq,  $J = 12.5, 9.0$  Hz, 3'-HH' isomer B), 1.40 (0.5H, dq,  $J = 13.5, 9.5, 8.5$  Hz, 3'-HH' isomer A);  $\delta_{\text{C}}$  (176 MHz,  $\text{CDCl}_3$ , mixture of diastereomers) 169.6(1) (C=O isomer A), 169.5(8) (C=O isomer B), 141.9 (ArC), 141.7 (ArC), 138.1 (ArC), 137.8 (ArC), 129.5 (C-2<sup>Ph</sup> isomer A), 129.4 (C-2<sup>Ph</sup> isomer B), 128.7(0) (ArC), 128.6(7) (ArC), 128.5 (ArC), 128.4 (ArC), 127.6 (ArC), 127.5 (ArC), 126.8 (ArC), 126.7 (ArC), 126.5(9) (ArC), 126.5(8) (ArC), 57.5 (C-2' isomer A), 57.0 (C-2' isomer B), 55.4 (C-1'' isomer B), 55.0 (C-1'' isomer A), 45.0(0) (C-5'), 44.9(6) (C-5'), 43.0 (C-2'' isomer B), 42.7 (C-2'' isomer A), 36.9 (C-2 isomer B), 36.5 (C-2 isomer A), 29.9 (C-3' isomer B),

29.4 (**C-3'** isomer A), 23.7(3) (**C-4'**), 23.7(0) (**C-4'**);  $m/z$  (LCMS, ESI<sup>+</sup>) 309 (MH<sup>+</sup>); Accurate mass: Found MH<sup>+</sup>, 309.1961; C<sub>20</sub>H<sub>25</sub>N<sub>2</sub>O requires *M*, 309.1967.

*N*-([2'''-Methylphenyl]phenylmethyl)-2-(pyrrolidin-2'-yl)acetamide **S19**

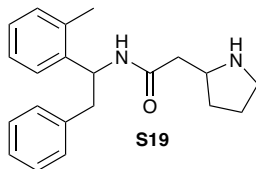

Obtained in 73% yield as a white solid. m.p. 178 – 181 °C;  $\nu_{\max}$  (ATR) 3254 (w), 3060 (w), 3022 (w), 1674 (s), 1632 (s), 1558 (s), 1200 (s), 1188 (m), 1142 (w) cm<sup>-1</sup>;  $\delta_{\text{H}}$  (700 MHz, CDCl<sub>3</sub>, mixture of diastereomers) 7.31 – 7.27 (2H, m, ArH) 7.26 – 7.22 (2H, m, ArH), 7.21 – 7.10 (5H, m, ArH), 6.30 (0.5H, d,  $J = 7.5$  Hz, 1''-H), 6.26 (0.5H, d,  $J = 7.5$  Hz, 1''-H), 3.80 – 3.74 (1H, m, 2'-H), 3.17 – 3.07 (2H, m, 5'-H<sub>2</sub>), 2.91 (0.5H, dd,  $J = 16.5$ , 7.5 Hz, 2-HH' isomer A), 2.88 (0.5H, dd,  $J = 16.5$ , 7.5 Hz, 2-HH' isomer B), 2.76 (0.5H, dd,  $J = 16.5$ , 5.0 Hz, 2-HH' isomer B), 2.73 (0.5H, dd,  $J = 16.5$ , 4.5 Hz, 2-HH' isomer A), 2.27 (1.5H, s, 2'''-CH<sub>3</sub>), 2.22 (1.5H, s, 2'''-CH<sub>3</sub>), 2.10 – 2.04 (1H, m, 3'-HH'), 2.00 – 1.91 (1H, m, 4'-HH'), 1.91 – 1.82 (1H, m, 4'-HH'), 1.71 – 1.61 (1H, m, 3'-HH');  $\delta_{\text{C}}$  (176 MHz, CDCl<sub>3</sub>, mixture of diastereomers) 169.6(0) (**C-1**), 169.5(8) (**C-1**), 140.5 (**C-1<sup>Ph</sup>**), 140.3 (**C-1<sup>Ph</sup>**), 139.2 (ArC), 139.0 (ArC), 136.1 (ArC), 136.0 (ArC), 130.9(2) (**C-3'''**), 130.9(0) (**C-3'''**), 128.9(3) (ArC), 128.8(6) (ArC), 127.8(4) (ArC), 127.7(9) (ArC), 127.7(5) (ArC), 127.7 (ArC), 127.5 (ArC), 127.0 (ArC), 126.6 (ArC), 126.5(3) (ArC), 126.4(9) (ArC), 56.9(0) (**C-2'**), 56.8(5) (**C-2'**), 54.8 (**C-1''**), 54.5 (**C-1''**), 45.0(0) (**C-5'**), 44.9(8) (**C-5'**), 36.4 (**C-2** isomer A), 36.2 (**C-2** isomer B), 30.0 (**C-3'**), 29.9 (**C-3'**), 23.9(2) (**C-4'**), 23.9(1) (**C-4'**), 19.6 (2'''-CH<sub>3</sub>), 19.5 (2'''-CH<sub>3</sub>);  $m/z$  (LCMS, ESI<sup>+</sup>) 309 (MH<sup>+</sup>); Accurate mass: Found MH<sup>+</sup>, 309.1978; C<sub>20</sub>H<sub>25</sub>N<sub>2</sub>O requires *M*, 309.1967.

*N*-([3'''-{Methanesulfonyl}phenyl]phenylmethyl)-2-(pyrrolidin-2'-yl)acetamide **S20**

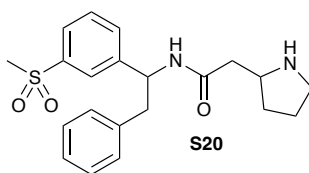

Obtained in 53% yield as a yellow oil.  $\nu_{\max}$  (ATR) 3300 (br), 3038 (w), 2964 (w), 2866 (w), 1658 (m), 1532 (m), 1418 (w), 1302 (s), 1146 (s), 1092 (w) cm<sup>-1</sup>;  $\delta_{\text{H}}$  (700 MHz, CDCl<sub>3</sub>, mixture of diastereomers) 9.14 (0.5H, d,  $J = 8.0$  Hz, 1-NH isomer B), 9.10 (0.5H, d,  $J = 8.0$  Hz, 1-NH isomer A), 7.92 (0.5H, t,  $J = 2.0$  Hz, 2'''-H), 7.87 (0.5H, t,  $J = 2.0$  Hz, 2'''-H), 7.82 – 7.78 (1H, m, 4'''-H), 7.54 – 7.51 (1H, m, 6'''-H), 7.51 – 7.47 (1H, m, 5'''-H), 7.34 – 7.29 (2H, m, 3<sup>Ph</sup>-H<sub>2</sub>), 7.28 – 7.25 (1H, m, 4<sup>Ph</sup>-H), 7.22 – 7.18 (2H, m, 2<sup>Ph</sup>-H<sub>2</sub>), 6.30 (1H, d,  $J = 8.0$  Hz, 1''-H), 3.45 (0.5H, ddt,  $J = 8.0$ , 7.5, 3.5 Hz, 2'-H isomer A), 3.40 (0.5H, ddt,  $J = 8.5$ , 7.5, 3.5 Hz, 2'-H isomer B), 3.02 (1.5H, s, SO<sub>2</sub>CH<sub>3</sub>), 3.01 (1.5H, s, SO<sub>2</sub>CH<sub>3</sub>), 2.92 (0.5H, ddd,  $J = 11.0$ , 7.5, 6.0 Hz, 5'-HH' isomer B),

2.89 (0.5H, ddd,  $J = 11.0, 8.0, 6.0$  Hz, 5'-**HH'** isomer B), 2.87 (0.5H, ddd,  $J = 11.0, 8.0, 6.5$  Hz, 5'-**HH'** isomer A), 2.79 (0.5H, ddd,  $J = 11.0, 7.5, 6.5$  Hz, 5'-**HH'** isomer A), 2.47 (0.5H, dd,  $J = 15.5, 3.5$  Hz, 2-**HH'** isomer A), 2.46 (0.5H, dd,  $J = 15.5, 3.5$  Hz, 2-**HH'** isomer B), 2.32 (0.5H, dd,  $J = 15.5, 8.5$  Hz, 2-**HH'** isomer B), 2.30 (0.5H, dd,  $J = 15.5, 8.0$  Hz, 2-**HH'** isomer A), 1.92 – 1.86 (1H, m, 3'-**HH'** isomer A, 3'-**HH'** isomer B), 1.80 – 1.73 (0.5H, m, 4'-**HH'** isomer B), 1.72 – 1.67 (0.5H, m, 4'-**HH'** isomer B), 1.67 – 1.60 (1H, m, 4'-**H**<sub>2</sub> isomer A), 1.42 – 1.34 (0.5H, m, 3'-**HH'** isomer B), 1.38 – 1.30 (0.5H, m, 3'-**HH'** isomer A);  $\delta_c$  (176 MHz, CDCl<sub>3</sub>, mixture of diastereomers) 171.7 (**C**-1 isomer A), 171.6 (**C**-1 isomer B), 144.5 (**C**-1'''), 144.4 (**C**-1'''), 141.2 (**C**-1<sup>Ph</sup> isomer A), 141.1 (**C**-1<sup>Ph</sup> isomer B), 141.0 (**C**-3'''), 140.9 (**C**-3'''), 132.9(1) (**C**-6'''), 132.8(6) (**C**-6'''), 129.7 (**C**-5'''), 129.6 (**C**-5'''), 129.1 (**C**-3<sup>Ph</sup>), 129.0 (**C**-3<sup>Ph</sup>), 128.0 (**C**-4<sup>Ph</sup>), 127.9 (**C**-4<sup>Ph</sup>), 127.7 (**C**-2<sup>Ph</sup>), 127.5 (**C**-2<sup>Ph</sup>), 126.2 (**C**-4'''), 126.1 (**C**-4'''), 125.7 (**C**-2'''), 125.5 (**C**-2'''), 56.4 (**C**-1''), 55.7(2) (**C**-2'), 55.6(9) (**C**-2'), 46.2 (**C**-5' isomer B), 46.1 (**C**-5' isomer A), 44.5(7) (SO<sub>2</sub>CH<sub>3</sub>), 44.5(6) (SO<sub>2</sub>CH<sub>3</sub>), 40.8 (**C**-2 isomer A), 40.7 (**C**-2 isomer B), 31.4 (**C**-3' isomer B), 31.2 (**C**-3' isomer A), 25.3(9) (**C**-4' isomer A), 25.3(6) (**C**-4' isomer B);  $m/z$  (LCMS, ESI<sup>+</sup>) 373 (MH<sup>+</sup>); Accurate mass: Found MH<sup>+</sup>, 373.1592: C<sub>20</sub>H<sub>25</sub>N<sub>2</sub>O<sub>3</sub>S requires  $M$ , 373.1586.

*N*-([Pyrrolidin-2''-yl]methyl)-2-phenylpropionamide **S21**

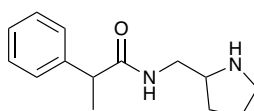

**S21**

Obtained in 28% yield as a yellow oil.  $\nu_{\max}$  (ATR) 3282 (br), 3058 (w), 3020 (w), 2964 (w), 2876 (w), 1647 (s), 1542 (br, m), 1456 (w), 1408 (w), 1360 (w), 1234 (w), 1184 (w), 1118 (w), 1070 (w) cm<sup>-1</sup>;  $\delta_H$  (600 MHz, CDCl<sub>3</sub>, mixture of diastereomers) 7.35 – 7.28 (4H, m, 2<sup>Ph</sup>-**H**<sub>2</sub>, 3<sup>Ph</sup>-**H**<sub>2</sub>), 7.26 – 7.22 (1H, m, 4<sup>Ph</sup>-**H**), 6.01 – 5.87 (1H, m, **NH**), 3.55 (0.5H, q,  $J = 7.0$  Hz, 2-**H** isomer A), 3.54 (0.5H, q,  $J = 7.0$  Hz, 2-**H** isomer B), 3.31 (0.5H, ddd,  $J = 13.5, 6.5, 4.5$  Hz, **NHCHH'** isomer A), 3.30 (0.5H, ddd,  $J = 13.0, 6.5, 4.5$  Hz, **NHCHH'** isomer B), 3.20 (0.5H, qd,  $J = 7.5, 4.5$  Hz, 2''-**H** isomer B), 3.15 (0.5H, tdd,  $J = 7.5, 7.0, 4.5$  Hz, 2''-**H** isomer A), 3.05 – 2.97 (1H, m, **NHCHH'** isomer A, **NHCHH'** isomer B), 2.85 – 2.76 (1.5H, m, 5''-**H**<sub>2</sub> isomer A, 5''-**HH'** isomer B), 2.74 (0.5H, dt,  $J = 10.5, 7.0$  Hz, 5''-**HH'** isomer B), 1.81 – 1.72 (1H, m, 3''-**HH'** isomer A, 3''-**HH'** isomer B), 1.72 – 1.63 (0.5H, m, 4''-**HH'** isomer A), 1.64 – 1.57 (1.5H, m, 4''-**HH'** isomer A, 4''-**H**<sub>2</sub> isomer B), 1.51 (3H, d,  $J = 7.0$  Hz, 3-**H**<sub>3</sub>), 1.28 (0.5H, ddt,  $J = 13.5, 8.5, 7.0$  Hz, 3''-**HH'** isomer A), 1.27 – 1.18 (0.5H, m, 3''-**HH'** isomer B);  $\delta_c$  (151 MHz, CDCl<sub>3</sub>, mixture of diastereomers) 174.5 (**C**=O isomer A), 174.4 (**C**=O isomer B), 141.7(7) (**C**-1<sup>Ph</sup> isomer B), 141.7(5) (**C**-1<sup>Ph</sup> isomer A), 128.9 (**C**-3<sup>Ph</sup>), 127.7(0) (**C**-2<sup>Ph</sup>), 127.6(9) (**C**-2<sup>Ph</sup>), 127.3 (**C**-4<sup>Ph</sup>), 57.6(7) (**C**-2'' isomer A), 57.6(5) (**C**-2'' isomer B), 47.3(3) (**C**-2), 47.3(1) (**C**-2), 46.7 (**C**-5'' isomer B), 46.6 (**C**-5'' isomer A), 44.0 (**NHCHH'** isomer A), 43.9 (**NHCHH'** isomer B), 29.1 (**C**-3'' isomer A), 29.0 (**C**-3'' isomer B), 26.0 (**C**-4''), 18.7 (**C**-3), 18.6 (**C**-3);  $m/z$  (LCMS, ESI<sup>+</sup>) 233 (MH<sup>+</sup>); Accurate mass: Found MH<sup>+</sup>, 233.1654: C<sub>14</sub>H<sub>21</sub>N<sub>2</sub>O requires  $M$ , 233.1654.

*N*-([Pyrrolidin-2'-yl]methyl)-2-phenylacetamide **S22**

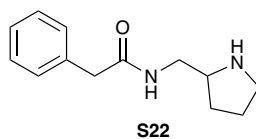

Obtained in 16% yield as a colourless oil.  $\nu_{\max}$  (ATR) 3014 (br), 2892 (w), 1674 (s), 1558 (w), 1444 (w), 1364 (s), 1201 (s), 1128 (w)  $\text{cm}^{-1}$ ;  $\delta_{\text{H}}$  (600 MHz,  $\text{CDCl}_3$ ) 7.82 – 7.77 (1H, m, NH), 7.31 (2H, t,  $J = 7.5$  Hz,  $3^{\text{Ph}}\text{-H}_2$ ), 7.26 – 7.25 (1H, m,  $4^{\text{Ph}}\text{-H}$ ), 7.23 (2H, d,  $J = 7.5$  Hz,  $2^{\text{Ph}}\text{-H}_2$ ), 3.77 – 3.71 (1H, m,  $2'\text{-H}$ ), 3.56 (1H, apparent dd,  $J = 15.0, 7.5$  Hz, NHCHH'), 3.53 (2H, s,  $2\text{-H}_2$ ), 3.37 (1H, dt,  $J = 15.0, 3.5$  Hz, NHCHH'), 3.15 (1H, ddd,  $J = 11.5, 8.0, 6.0$  Hz,  $5'\text{-HH}'$ ), 3.07 (1H, dt,  $J = 11.5, 7.5$  Hz,  $5'\text{-HH}'$ ), 2.09 – 2.00 (1H, m,  $3'\text{-HH}'$ ), 1.99 – 1.87 (2H, m,  $4'\text{-H}_2$ ), 1.62 (1H, dq,  $J = 13.0, 8.5$  Hz,  $3'\text{-HH}'$ );  $\delta_{\text{C}}$  (151 MHz,  $\text{CDCl}_3$ ) 173.8 (C=O), 134.8 (C-1<sup>Ph</sup>), 129.5 (C-2<sup>Ph</sup>), 129.0 (C-3<sup>Ph</sup>), 127.5 (C-4<sup>Ph</sup>), 60.3 (C-2'), 45.2 (C-5'), 43.2 (C-2), 41.0 (NHCHH'), 27.8 (C-3'), 24.1 (C-4');  $m/z$  (LCMS, ESI<sup>+</sup>) 219 (MH<sup>+</sup>); Accurate mass: Found MH<sup>+</sup>, 219.1497; C<sub>13</sub>H<sub>19</sub>N<sub>2</sub>O requires  $M$ , 219.1497.

*N*-(1''-Phenylhexyl)-2-(pyrrolidin-2'-yl)acetamide **S23**

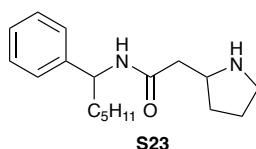

Obtained in 31% yield as a yellow oil.  $\nu_{\max}$  (ATR) 3290 (br), 3076 (w), 2964 (w), 2930 (w), 2858 (w), 1650 (s), 1558 (m), 1456 (w), 1418 (w), 1199 (s), 1175 (s), 1130 (s)  $\text{cm}^{-1}$ ;  $\delta_{\text{H}}$  (700 MHz,  $\text{CDCl}_3$ , mixture of diastereomers) 7.74 (0.5H, d,  $J = 7.5$  Hz, 1-NH isomer A), 7.68 (0.5H, d,  $J = 7.5$  Hz, 1-NH isomer B), 7.31 – 7.27 (2H, m,  $3^{\text{Ph}}\text{-H}_2$ ), 7.26 – 7.23 (2H, m,  $2^{\text{Ph}}\text{-H}_2$ ), 7.23 – 7.19 (1H, m,  $4^{\text{Ph}}\text{-H}$ ), 4.78 (0.5H, q,  $J = 7.5$  Hz,  $1''\text{-H}$  isomer B), 4.76 (0.5H, q,  $J = 7.5$  Hz,  $1''\text{-H}$  isomer A), 3.79 – 3.72 (1H, m,  $2'\text{-H}$ ), 3.21 – 3.15 (1H, m,  $5'\text{-HH}'$ ), 3.13 – 3.07 (1H, m,  $5'\text{-HH}'$ ), 2.86 (0.5H, dd,  $J = 16.0, 7.5$  Hz,  $2\text{-HH}'$  isomer B), 2.81 (0.5H, dd,  $J = 15.5, 7.0$  Hz,  $2\text{-HH}'$  isomer A), 2.65 (0.5H, dd,  $J = 16.0, 5.0$  Hz,  $2\text{-HH}'$  isomer B), 2.62 (0.5H, dd,  $J = 15.5, 5.0$  Hz,  $2\text{-HH}'$  isomer A), 2.11 – 2.04 (1H, m,  $3'\text{-HH}'$  isomer A,  $3'\text{-HH}'$  isomer B), 2.02 – 1.94 (1H, m,  $4'\text{-HH}'$ ), 1.92 – 1.83 (1H, m,  $4'\text{-HH}'$ ), 1.80 – 1.60 (3H, m,  $2''\text{-H}_2$ ,  $3'\text{-HH}'$  isomer A,  $3'\text{-HH}'$  isomer B), 1.32 – 1.13 (6H, m,  $3''\text{-H}_2$ ,  $4''\text{-H}_2$ ,  $5''\text{-H}_2$ ), 0.88 – 0.80 (3H, m,  $6''\text{-H}_3$ );  $\delta_{\text{C}}$  (176 MHz,  $\text{CDCl}_3$ , mixture of diastereomers) 169.8 (C=O isomer B), 169.7 (C=O isomer A), 142.7 (C-1<sup>Ph</sup> isomer B), 142.5 (C-1<sup>Ph</sup> isomer A), 128.7 (C-3<sup>Ph</sup>), 127.4 (C-4<sup>Ph</sup>), 127.3 (C-4<sup>Ph</sup>), 126.7 (C-2<sup>Ph</sup> isomer A), 126.5 (C-2<sup>Ph</sup> isomer B), 57.0(9) (C-2' isomer A), 57.0(5) (C-2' isomer B), 54.4(4) (C-1'' isomer A), 54.3(6) (C-1'' isomer B), 45.0 (C-5' isomer B), 44.9 (C-5' isomer A), 36.9 (C-2 isomer B), 36.6(4) (C-2'' isomer B), 36.6(2) (C-2 isomer A), 36.3 (C-2'' isomer A), 31.6(4) (C-4''), 31.6(1) (C-4''), 30.1 (C-3' isomer B), 29.8 (C-3' isomer A), 26.0(9) (C-3'' isomer B), 26.0(6) (C-3'' isomer A), 24.0 (C-4' isomer A), 23.9 (C-4' isomer B), 22.6(1) (C-5''), 22.5(9) (C-5''), 14.1(3) (C-6''), 14.1(2) (C-6'');  $m/z$  (LCMS, ESI<sup>+</sup>) 289 (MH<sup>+</sup>); Accurate mass: Found MH<sup>+</sup>, 289.2284; C<sub>18</sub>H<sub>29</sub>N<sub>2</sub>O requires  $M$ , 289.2280.

*N*-([Pyrrolidin-2''-yl]methyl)-2-(phenyl)-2-cyclopentylacetamide **S24**

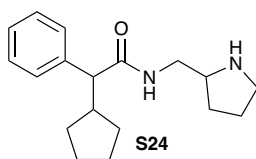

Obtained in 11% yield as a pale yellow oil.  $\nu_{\max}$  (ATR) 3296 (br), 2950 (m), 2868 (w), 1645 (s), 1542 (m), 1446 (w), 1374 (w), 1222 (w)  $\text{cm}^{-1}$ ;  $\delta_{\text{H}}$  (600 MHz,  $\text{CDCl}_3$ , mixture of diastereomers) 7.38 – 7.31 (2H, m,  $2^{\text{Ph}}\text{-H}_2$ ), 7.28 (2H, td,  $J = 7.5, 2.5$  Hz,  $3^{\text{Ph}}\text{-H}_2$ ), 7.24 – 7.20 (1H, m,  $4^{\text{Ph}}\text{-H}$ ), 6.21 – 6.11 (1H, m, **NH**), 3.37 (0.5H, ddd,  $J = 13.5, 6.0, 4.5$  Hz, **NHCHH'** isomer A), 3.29 (0.5H, ddd,  $J = 13.0, 6.0, 4.0$  Hz, **NHCHH'** isomer B), 3.22 (0.5H, qd,  $J = 7.5, 4.5$  Hz,  $2''\text{-H}$  isomer A), 3.17 (0.5H, ddt,  $J = 7.5, 7.0, 4.0$  Hz,  $2''\text{-H}$  isomer B), 3.06 (0.5H, ddd,  $J = 13.0, 7.5, 5.5$  Hz, **NHCHH'** isomer B), 2.99 (1H, d,  $J = 11.0$  Hz,  $2\text{-H}$ ), 2.96 (0.5H, ddd,  $J = 13.5, 7.5, 5.0$  Hz, **NHCHH'** isomer A), 2.88 – 2.81 (1.5H, m,  $5''\text{-HH'}$  isomer A,  $5''\text{-H}_2$  isomer B), 2.78 (0.5H, dt,  $J = 10.5, 6.5$  Hz,  $5''\text{-HH'}$  isomer A), 2.67 – 2.56 (1H, m,  $1^{\text{Cyp}}\text{-H}$ ), 1.98 – 1.91 (1H, m,  $2^{\text{Cyp}}\text{-(HH')}(HH')$ ), 1.82 – 1.73 (1H, m,  $3''\text{-HH'}$  isomer A,  $3''\text{-HH'}$  isomer B), 1.73 – 1.68 (0.5H, m,  $4''\text{-HH'}$  isomer B), 1.68 – 1.51 (4.5H, m,  $3^{\text{Cyp}}\text{-(HH')H}_2$ ,  $3^{\text{Cyp}}\text{-(HH')H}_2$ ,  $4''\text{-H}_2$  isomer A,  $4''\text{-HH'}$  isomer B), 1.51 – 1.45 (1H, m,  $3^{\text{Cyp}}\text{-(HH')H}_2$ ), 1.45 – 1.38 (1H, m,  $2^{\text{Cyp}}\text{-(HH')}(HH')$ ), 1.31 (0.5H, ddt,  $J = 12.5, 8.5, 7.0$  Hz,  $3''\text{-HH'}$  isomer B), 1.28 – 1.19 (1.5H, m,  $2^{\text{Cyp}}\text{-(HH')}(HH')$ ,  $3''\text{-HH'}$  isomer A), 0.98 (1H, dq,  $J = 12.5, 8.5$  Hz,  $2^{\text{Cyp}}\text{-(HH')}(HH')$ );  $\delta_{\text{C}}$  (151 MHz,  $\text{CDCl}_3$ , mixture of diastereomers) 173.8 (**C=O** isomer B), 173.7 (**C=O** isomer A), 140.5(3) (**C-1<sup>Ph</sup>**), 140.5(2) (**C-1<sup>Ph</sup>**), 128.6 (**C-3<sup>Ph</sup>**), 128.1 (**C-2<sup>Ph</sup>**), 127.1 (**C-4<sup>Ph</sup>**), 60.2 (**C-2**), 57.9 (**C-2''** isomer A), 57.7 (**C-2''** isomer B), 46.6(7) (**C-5''**), 46.6(5) (**C-5''**), 43.7 (**NHCHH'**), 43.4 (**C-1<sup>Cyp</sup>**), 43.3 (**C-1<sup>Cyp</sup>**), 31.8(6) (**C-2<sup>Cyp</sup>**), 31.8(5) (**C-2<sup>Cyp</sup>**), 31.1 (**C-2<sup>Cyp</sup>**), 29.0(2) (**C-3''** isomer A), 28.9(9) (**C-3''** isomer B), 26.0(2) (**C-4''** isomer A), 25.9(9) (**C-4''** isomer B), 25.3(4) (**C-3<sup>Cyp</sup>**), 25.3(3) (**C-3<sup>Cyp</sup>**), 25.0(4) (**C-3<sup>Cyp</sup>**), 25.0(3) (**C-3<sup>Cyp</sup>**);  $m/z$  (LCMS,  $\text{ESI}^+$ ) 287 ( $\text{MH}^+$ ); Accurate mass: Found  $\text{MH}^+$ , 287.2120:  $\text{C}_{18}\text{H}_{27}\text{N}_2\text{O}$  requires  $M$ , 287.2123.

*N*-([Pyrrolidin-2'-yl]methyl)-1-phenyl-cyclohexane-1-carboxamide **S25**

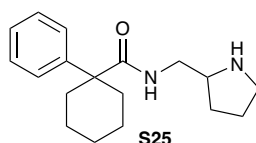

Obtained in 58% yield as an orange oil.  $\nu_{\max}$  (ATR) 3340 (br), 2942 (m), 2856 (w), 2782 (w), 1671 (s), 1594 (s), 1524 (s), 1446 (m), 1199 (s), 1131 (s)  $\text{cm}^{-1}$ ;  $\delta_{\text{H}}$  (600 MHz,  $\text{CDCl}_3$ ) 7.41 (2H, d,  $J = 7.5$  Hz,  $2^{\text{Ph}}\text{-H}_2$ ), 7.34 – 7.28 (1H, m, **NH**), 7.30 (2H, t,  $J = 7.5$  Hz,  $3^{\text{Ph}}\text{-H}_2$ ), 7.20 (1H, t,  $J = 7.5$  Hz,  $4^{\text{Ph}}\text{-H}$ ), 3.69 – 3.61 (2H, m, **NHCHH'**,  $2'\text{-H}$ ), 3.29 – 3.23 (1H, m, **NHCHH'**), 2.99 (1H, ddd,  $J = 11.5, 7.5, 4.5$  Hz,  $5'\text{-HH'}$ ), 2.60 (1H, ddd,  $J = 11.5, 9.0, 7.0$  Hz,  $5'\text{-HH'}$ ), 2.40 – 2.29 (2H, m,  $2\text{-(HH')}(HH')$ ,  $2\text{-(HH')}(HH')$ ), 2.00 – 1.93 (1H, m,  $2\text{-(HH')}(HH')$ ), 1.93 – 1.82 (2H, m,  $3'\text{-HH'}$ ,  $2\text{-(HH')}(HH')$ ), 1.79 – 1.68 (1H, m,  $4'\text{-HH'}$ ), 1.68 – 1.58 (2H, m,  $4'\text{-HH'}$ ,  $3\text{-(HH')H}_2$ ), 1.58 – 1.47 (4H, m,  $3\text{-(HH')H}_2$ ,  $4\text{-HH'}$ ,  $3\text{-(HH')H}_2$ ), 1.43 (1H, ddd,  $J = 16.5, 13.5, 8.0$  Hz,  $3'\text{-HH'}$ ), 1.38 – 1.30 (1H,

m, 4-*HH'*);  $\delta_c$  (151 MHz, CDCl<sub>3</sub>) 177.5 (**C=O**), 144.1 (**C-1<sup>Ph</sup>**), 128.7 (**C-3<sup>Ph</sup>**), 126.8 (**C-4<sup>Ph</sup>**), 126.3 (**C-2<sup>Ph</sup>**), 59.9 (**C-2'**), 50.6 (**C-1**), 45.2 (**C-5'**), 39.9 (NHCHH'), 34.6 (**C-2**), 33.8 (**C-2**), 27.1 (**C-3'**), 25.8 (**C-4**), 24.6 (**C-4'**), 23.3 (**C-3**); *m/z* (LCMS, ESI<sup>+</sup>) 287 (MH<sup>+</sup>); Accurate mass: Found MH<sup>+</sup>, 287.2133: C<sub>18</sub>H<sub>27</sub>N<sub>2</sub>O requires *M*, 287.2123.

*N*-([Tetrahydrofuran-2''''-yl]phenylmethyl)-2-(pyrrolidin-2'-yl)acetamide **S26**

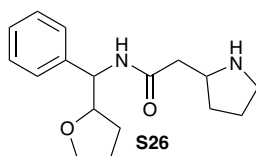

Obtained in 29% yield as a pale yellow oil.  $\nu_{\max}$  (ATR) 3282 (br), 2968 (w), 2876 (w), 1641 (s), 1536 (s), 1070 (m) cm<sup>-1</sup>;  $\delta_H$  (600 MHz, CDCl<sub>3</sub>, mixture of diastereomers) 8.44 (0.3H, d, *J* = 8.5 Hz, 1-NH), 8.42 (0.3H, d, *J* = 8.5 Hz, 1-NH), 8.22 (0.2H, d, *J* = 8.5 Hz, 1-NH), 8.18 (0.2H, d, *J* = 8.5 Hz, 1-NH), 7.37 – 7.27 (4H, m, ArH), 7.25 – 7.20 (1H, m, ArH), 5.05 (0.2H, dd, *J* = 8.5, 4.0 Hz, 1''-H), 5.04 (0.2H, dd, *J* = 8.5, 4.0 Hz, 1''-H), 5.00 (0.3H, dd, *J* = 8.5, 5.0 Hz, 1''-H), 4.99 (0.3H, dd, *J* = 8.5, 5.0 Hz, 1''-H), 4.22 (0.3H, td, *J* = 7.0, 5.0 Hz, 2''''-H), 4.20 (0.3H, td, *J* = 7.0, 5.0 Hz, 2''''-H), 4.16 (0.2H, td, *J* = 6.5, 4.0 Hz, 2''''-H), 4.14 (0.2H, td, *J* = 6.5, 2.0 Hz, 2''''-H), 3.91 (0.2H, td, *J* = 7.0, 3.0 Hz, 5''''-HH'), 3.90 (0.2H, td, *J* = 7.0, 3.0 Hz, 5''''-HH'), 3.78 (0.2H, td, *J* = 8.0, 6.0 Hz, 5''''-HH'), 3.77 (0.2H, td, *J* = 8.0, 6.0 Hz, 5''''-HH'), 3.73 – 3.66 (1.2H, m, 5''''-H<sub>2</sub>), 3.42 – 3.31 (1H, m, 2'-H), 3.00 (0.3H, ddd, *J* = 11.0, 8.0, 6.0 Hz, 5'-HH'), 2.99 (0.3H, ddd, *J* = 10.5, 8.0, 5.5 Hz, 5'-HH'), 2.96 – 2.86 (1.4H, m, 5'-HH', 5'-H<sub>2</sub>), 2.46 (0.2H, dd, *J* = 15.0, 4.0 Hz, 2-HH'), 2.43 (0.3H, dd, *J* = 15.5, 4.0 Hz, 2-HH'), 2.42 (0.2H, dd, *J* = 15.0, 4.0 Hz, 2-HH'), 2.39 (0.3H, dd, *J* = 15.5, 4.0 Hz, 2-HH'), 2.31 (0.2H, dd, *J* = 15.5, 8.5 Hz, 2-HH'), 2.28 (0.2H, dd, *J* = 15.5, 8.5 Hz, 2-HH'), 2.27 (0.3H, dd, *J* = 15.0, 8.5 Hz, 2-HH'), 2.24 (0.3H, dd, *J* = 15.0, 8.0 Hz, 2-HH'), 1.97 – 1.78 (3.4H, m, 4'-H<sub>2</sub>, 2''-H<sub>2</sub>, 4''''-H<sub>2</sub>, 3''''-H<sub>2</sub>), 1.77 – 1.63 (2.4H, m, 4'-H<sub>2</sub>, 4''''-H<sub>2</sub>, 3''''-H<sub>2</sub>), 1.63 – 1.56 (0.6H, m, 3''''-H<sub>2</sub>), 1.56 – 1.48 (0.6H, m, 4''''-H<sub>2</sub>), 1.44 – 1.26 (1H, m, 3'-H<sub>2</sub>);  $\delta_c$  (151 MHz, CDCl<sub>3</sub>, mixture of diastereomers) 171.8 (**C=O**), 171.3 (**C=O**), 141.5(3) (**C-1<sup>Ph</sup>**), 141.4(6) (**C-1<sup>Ph</sup>**), 139.6(0) (**C-1<sup>Ph</sup>**), 139.5(5) (**C-1<sup>Ph</sup>**), 128.6 (ArC), 128.4 (ArC), 128.3(1) (ArC), 128.2(6) (ArC), 127.5 (ArC), 127.4 (ArC), 127.3(0) (ArC), 127.2(6) (ArC), 127.2 (ArC), 127.1 (ArC), 81.8 (**C-2''''**), 81.7 (**C-2''''**), 81.4(4) (**C-2''''**), 81.4(2) (**C-2''''**), 69.0 (**C-5''''**), 68.9(0) (**C-5''''**), 68.8(5) (**C-5''''**), 68.8 (**C-5''''**), 56.3 (**C-1''**), 56.2 (**C-1''**), 56.0(2) (**C-2'**), 55.9(5) (**C-2'**), 55.9 (**C-2'**), 55.8 (**C-2'**), 55.5(4) (**C-1''**), 55.4(8) (**C-1''**), 46.3(4) (**C-5'**), 46.3(0) (**C-5'**), 46.2 (**C-5'**), 41.6(3) (**C-2**), 41.5(9) (**C-2**), 41.5 (**C-2**), 41.3 (**C-2**), 31.5 (**C-3'**), 31.4 (**C-3'**), 31.3 (**C-3'**), 31.1 (**C-3'**), 29.2(4) (**C-3''''**), 29.1(8) (**C-3''''**), 28.4(3) (**C-3''''**), 28.4(0) (**C-3''''**), 26.0(3) (**C-4''''**), 25.9(8) (**C-4''''**), 25.7(8) (**C-4''''**), 25.7(5) (**C-4''''**), 25.4 (**C-4'**), 25.3 (**C-4'**), 25.2(3) (**C-4'**), 25.1(8) (**C-4'**); *m/z* (LCMS, ESI<sup>+</sup>) 289 (MH<sup>+</sup>); Accurate mass: Found MH<sup>+</sup>, 289.1902: C<sub>17</sub>H<sub>25</sub>N<sub>2</sub>O<sub>2</sub> requires *M*, 289.1916.



*N*-([Pyrrolidin-2''-yl]methyl)-2-(2',4'-di[trifluoromethyl]phenyl)acetamide **S27**

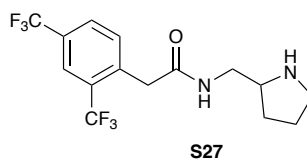

Obtained in 49% yield an off-white solid. m.p. 90 – 93 °C;  $\nu_{\max}$  (ATR) 3282 (br), 3072 (w), 2964 (w), 2868 (w), 1655 (m), 1564 (w), 1524 (w), 1346 (s), 1276 (s), 1125 (s), 1056 (m)  $\text{cm}^{-1}$ ;  $\delta_{\text{H}}$  (700 MHz,  $\text{CDCl}_3$ ) 7.91 (1H, s, 3'-**H**), 7.79 (1H, d,  $J = 8.0$  Hz, 5'-**H**), 7.68 (1H, d,  $J = 8.0$  Hz, 6'-**H**), 6.14 (1H, br m, N-**H**), 3.76 (2H, s, 2-**H**<sub>2</sub>), 3.38 (1H, ddd,  $J = 13.5, 6.0, 4.5$  Hz, NHCH**H'**), 3.26 (1H, dddd,  $J = 8.0, 7.5, 7.0, 4.5$  Hz, 2''-**H**), 3.02 (1H, ddd,  $J = 13.5, 7.5, 5.0$  Hz, NHCH**H'**), 2.90 (1H, ddd,  $J = 10.5, 7.5, 6.0$  Hz, 5''-**HH'**), 2.83 (1H, dt,  $J = 10.5, 6.5$  Hz, 5''-**HH'**), 1.93 (1H, br m, 1''-**H**), 1.83 (1H, dtd,  $J = 13.0, 8.0, 5.5$  Hz, 3''-**HH'**), 1.77 – 1.69 (1H, m, 4''-**HH'**), 1.72 – 1.63 (1H, m, 4''-**HH'**), 1.33 (1H, ddt,  $J = 13.0, 9.0, 7.0$  Hz, 3''-**HH'**);  $\delta_{\text{C}}$  (176 MHz,  $\text{CDCl}_3$ ) 168.7 (**C=O**), 137.9 (**C-1'**), 133.6 (**C-6'**), 130.0 (q,  $J = 33.5$  Hz, **C-4'**), 129.62 (q,  $J = 31.0$  Hz, **C-2'**), 128.9 (**C-5'**), 124.53 (q,  $J = 274.0$  Hz, 2'-**CF**<sub>3</sub>), 123.48 (q,  $J = 272.0$  Hz, 4'-**CF**<sub>3</sub>), 123.4 (**C-3'**), 57.4 (**C-2''**), 46.7 (**C-5''**), 44.1 (NHCH**H'**), 40.1 (**C-2**), 29.2 (**C-3''**), 26.1 (**C-4''**);  $\delta_{\text{F}}$  (376 MHz,  $\text{CDCl}_3$ ) -60.40 (Al**F**), -63.30 (Al**F**);  $m/z$  (LCMS, ESI<sup>+</sup>) 355 (MH<sup>+</sup>); Accurate mass: Found MH<sup>+</sup>, 355.1249; C<sub>15</sub>H<sub>17</sub>N<sub>2</sub>OF<sub>6</sub> requires *M*, 355.1245.

*N*-(3''-[Pyrazol-1'''-yl]prop-1''-yl)-2-(4'-chlorophenyl)-2-phenylacetamide **S28**

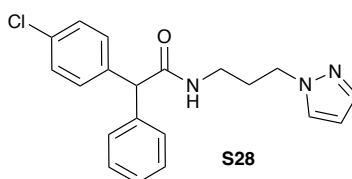

Obtained in 44% yield as a white solid. m.p. 61 – 63 °C;  $\nu_{\max}$  (ATR) 3300 (br), 3072 (w), 3018 (w), 2942 (w), 1646 (s), 1544 (m), 1489 (s), 1402 (m), 1368 (m), 1275 (m), 1212 (m), 1180 (w), 1092 (m), 1019 (s)  $\text{cm}^{-1}$ ;  $\delta_{\text{H}}$  (700 MHz,  $\text{CDCl}_3$ ) 7.43 (1H, dd,  $J = 2.0, 0.5$  Hz, 3'''-**H**), 7.34 – 7.31 (3H, m, Ar**H**), 7.30 – 7.26 (3H, m, Ar**H**), 7.25 – 7.22 (2H, m, Ar**H**), 7.21 – 7.18 (2H, m, Ar**H**), 6.23 – 6.19 (1H, m, 4'''-**H**), 6.16 (1H, t,  $J = 5.5$  Hz, N**H**), 4.78 (1H, s, 2-**H**), 4.13 (2H, t,  $J = 6.5$  Hz, 3''-**H**<sub>2</sub>), 3.32 – 3.22 (2H, m, 1''-**H**<sub>2</sub>), 2.02 (2H, p,  $J = 6.5$  Hz, 2''-**H**<sub>2</sub>);  $\delta_{\text{C}}$  (176 MHz,  $\text{CDCl}_3$ ) 171.7 (**C=O**), 139.5 (**C-3'''**), 139.2 (Ar**C**), 138.1 (Ar**C**), 133.3 (**C-4'**), 130.4 (Ar**C**), 129.5 (**C-5'''**), 129.0 (Ar**C**), 128.9 (Ar**C**), 128.8 (Ar**C**), 127.6 (Ar**C**), 105.9 (**C-4'''**), 58.6 (**C-2**), 49.7 (**C-3''**), 37.4 (**C-1''**), 30.2 (**C-2''**);  $m/z$  (LCMS, ESI<sup>+</sup>) 354 (M(<sup>35</sup>Cl)H<sup>+</sup>), 356 (M(<sup>37</sup>Cl)H<sup>+</sup>); Accurate mass: Found MH<sup>+</sup>, 354.1378; C<sub>20</sub>H<sub>21</sub>N<sub>3</sub>O<sup>35</sup>Cl requires *M*, 354.1373.

*N*-(2''-[*N*-Methyl-1''',2''',4'''-triazol-5'''-yl]eth-1''-yl)-2-(4'-chlorophenyl)-2-phenylacetamide **S29**

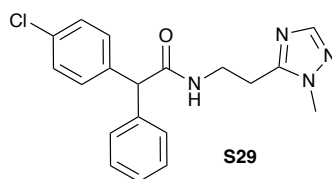

Obtained in 31% yield as a colourless oil.  $\nu_{\max}$  (ATR) 3308 (br), 3040 (w), 2958 (w), 1655 (s), 1524 (w), 1491 (s), 1368 (m), 1222 (m), 1088 (w), 1015 (w)  $\text{cm}^{-1}$ ;  $\delta_{\text{H}}$  (700 MHz,  $\text{CDCl}_3$ ) 7.69 (1H, s, 3'''-H), 7.32 – 7.29 (2H, m, 3<sup>Ph</sup>-H<sub>2</sub>), 7.28 – 7.25 (3H, m, 3'-H<sub>2</sub>, 4<sup>Ph</sup>-H), 7.19 – 7.17 (2H, m, 2<sup>Ph</sup>-H<sub>2</sub>), 7.16 – 7.14 (2H, m, 2'-H<sub>2</sub>), 6.67 – 6.63 (1H, m, NH), 4.80 (1H, s, 2-H), 3.75 (3H, s, NCH<sub>3</sub>), 3.74 (2H, q,  $J = 6.0$  Hz, 1''-H<sub>2</sub>), 2.91 (2H, t,  $J = 6.0$  Hz, 2''-H<sub>2</sub>);  $\delta_{\text{C}}$  (176 MHz,  $\text{CDCl}_3$ ) 171.9 (C=O), 153.3 (C-5'''), 150.2 (C-3'''), 138.9 (C-1<sup>Ph</sup>), 137.8 (C-1'), 133.3 (C-4'), 130.3 (C-2'), 129.0(1) (ArC), 128.9(5) (ArC), 128.8 (C-2<sup>Ph</sup>), 127.6 (C-4<sup>Ph</sup>), 58.6 (C-2), 36.9 (C-1''), 35.2 (NCH<sub>3</sub>), 25.5 (C-2'');  $m/z$  (LCMS, ESI<sup>+</sup>) 355 (M(<sup>35</sup>Cl)H<sup>+</sup>), 357 (M(<sup>37</sup>Cl)H<sup>+</sup>); Accurate mass: Found MH<sup>+</sup>, 355.1329: C<sub>19</sub>H<sub>20</sub>N<sub>4</sub>O<sup>35</sup>Cl requires  $M$ , 355.1326.

*N*-(2''-[3''',5'''-Dimethylpyrazol-1'''-yl]eth-1''-yl)-2-(4'-chlorophenyl)-2-phenylacetamide **S30**

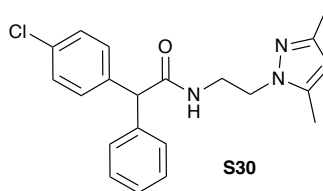

Obtained in 49% yield as a white solid. m.p. 100 – 101 °C;  $\nu_{\max}$  (ATR) 3282 (br), 3086 (w), 3060 (w), 2922 (w), 1649 (s), 1551 (s), 1489 (s), 1453 (m), 1360 (w), 1222 (w), 1090 (m), 1015 (m)  $\text{cm}^{-1}$ ;  $\delta_{\text{H}}$  (700 MHz,  $\text{CDCl}_3$ ) 7.32 – 7.29 (2H, m, 3<sup>Ph</sup>-H<sub>2</sub>), 7.28 – 7.24 (3H, m, 3'-H<sub>2</sub>, 4<sup>Ph</sup>-H), 7.20 – 7.18 (2H, m, 2<sup>Ph</sup>-H<sub>2</sub>), 7.17 – 7.14 (2H, m, 2'-H<sub>2</sub>), 6.49 (1H, t,  $J = 6.0$  Hz, NH), 5.75 (1H, s, 4'''-H), 4.82 (1H, s, 2-H), 4.03 (2H, dd,  $J = 6.5, 5.0$  Hz, 2''-H<sub>2</sub>), 3.69 (2H, ddd,  $J = 6.5, 6.0, 5.0$  Hz, 1''-H<sub>2</sub>), 2.12 (3H, s, 5'''-CH<sub>3</sub>), 2.11 (3H, s, 3'''-CH<sub>3</sub>);  $\delta_{\text{C}}$  (176 MHz,  $\text{CDCl}_3$ ) 171.9 (C=O), 148.1 (C-3'''), 139.6 (C-5'''), 138.9 (C-1<sup>Ph</sup>), 137.9 (C-1'), 133.3 (C-4'), 130.4 (C-2'), 129.0 (ArC), 128.9(4) (ArC), 128.8(8) (ArC), 127.6 (C-4<sup>Ph</sup>), 105.3 (C-4'''), 58.7 (C-2), 46.9 (C-2''), 39.8 (C-1''), 13.6 (3'''-CH<sub>3</sub>), 11.0 (5'''-CH<sub>3</sub>);  $m/z$  (LCMS, ESI<sup>+</sup>) 368 (M(<sup>35</sup>Cl)H<sup>+</sup>), 370 (M(<sup>37</sup>Cl)H<sup>+</sup>); Accurate mass: Found MH<sup>+</sup>, 368.1525: C<sub>21</sub>H<sub>23</sub>N<sub>3</sub>O<sup>35</sup>Cl requires  $M$ , 368.1530.

*N*-([Imidazo[1,2-*a*]pyridin-2''-yl)methyl)-2-(4'-chlorophenyl)-2-phenylacetamide **S31**

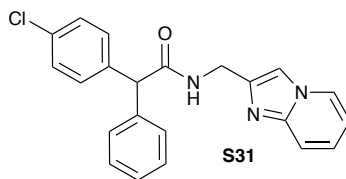

Obtained in 13% yield as a yellow oil.  $\nu_{\max}$  (ATR) 3282 (br), 3062 (w), 3020 (w), 1668 (s), 1534 (w), 1490 (s), 1364 (w), 1208 (m), 1136 (w), 1018 (w)  $\text{cm}^{-1}$ ;  $\delta_{\text{H}}$  (600 MHz,  $\text{CDCl}_3$ ) 8.10 (1H, d,  $J = 7.0$  Hz, 5''-H), 7.69 – 7.62 (1H, m, NH), 7.65 (1H, d,  $J = 9.0$  Hz, 8''-H), 7.54 (1H, s, 3''-H), 7.39 – 7.36 (1H, m, 7''-H), 7.25 – 7.23 (4H, m, 2<sup>Ph</sup>-H<sub>2</sub>, ArH), 7.23 – 7.19 (5H, m, 2'-H<sub>2</sub>, ArH), 6.96 (1H, t,  $J = 7.0$  Hz, 6''-H), 4.89 (1H, s, 2-H), 4.60 (2H, t,  $J = 5.5$  Hz, NHCH<sub>2</sub>);  $\delta_{\text{C}}$  (151 MHz,  $\text{CDCl}_3$ ) 172.1 (C=O), 143.3 (C-9''), 140.4 (C-2''), 139.1 (C-1<sup>Ph</sup>), 138.1 (C-1'), 133.1 (C-4'), 130.4 (ArC), 128.8(4) (ArC), 128.7(7) (ArC), 127.9 (C-7''), 127.5 (ArC), 126.4 (C-5''), 115.9 (C-8''), 114.4 (C-6''), 110.9 (C-3''), 57.9 (C-2), 36.6 (NHCH<sub>2</sub>);  $m/z$  (LCMS, ESI<sup>+</sup>) 376 (M(<sup>35</sup>Cl)H<sup>+</sup>), 378 (M(<sup>37</sup>Cl)H<sup>+</sup>); Accurate mass: Found MH<sup>+</sup>, 376.1211: C<sub>22</sub>H<sub>19</sub>N<sub>3</sub>O<sup>35</sup>Cl requires  $M$ , 376.1217.

*N*-([Pyridin-4''-yl)methyl)-2-(4'-chlorophenyl)-2-phenylacetamide **S32**

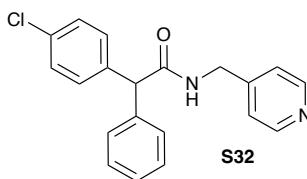

Obtained in 40% yield as a white solid. m.p. 148 – 149 °C;  $\nu_{\max}$  (ATR) 3094 (w), 3022 (w), 2946 (w), 1656 (s), 1371 (m), 1218 (m)  $\text{cm}^{-1}$ ;  $\delta_{\text{H}}$  (700 MHz,  $\text{CDCl}_3$ ) 8.55 – 8.52 (2H, m, 2''-H<sub>2</sub>), 7.37 – 7.34 (2H, m, 3<sup>Ph</sup>-H<sub>2</sub>), 7.32 – 7.29 (3H, m, 3'-H<sub>2</sub>, 4<sup>Ph</sup>-H<sub>2</sub>), 7.26 – 7.24 (2H, m, 2<sup>Ph</sup>-H<sub>2</sub>), 7.23 – 7.20 (2H, m, 2'-H<sub>2</sub>), 7.11 – 7.09 (2H, m, 3''-H<sub>2</sub>), 6.00 – 5.95 (1H, m, NH), 4.94 (1H, s, 2-H), 4.49 (2H, d,  $J = 6.0$  Hz, NHCH<sub>2</sub>);  $\delta_{\text{C}}$  (101 MHz,  $\text{CDCl}_3$ ) 171.9 (C=O), 150.1 (C-2''), 147.4 (C-4''), 138.8 (C-1<sup>Ph</sup>), 137.7 (C-1'), 133.5 (C-4'), 130.3 (C-2'), 129.2 (C-3<sup>Ph</sup>), 129.0 (C-3'), 128.8 (C-2<sup>Ph</sup>), 127.9 (C-4<sup>Ph</sup>), 122.3 (C-3''), 58.3 (C-2), 42.7 (NHCH<sub>2</sub>);  $m/z$  (LCMS, ESI<sup>+</sup>) 337 (M(<sup>35</sup>Cl)H<sup>+</sup>), 339 (M(<sup>37</sup>Cl)H<sup>+</sup>); Accurate mass: Found MH<sup>+</sup>, 337.1110: C<sub>20</sub>H<sub>18</sub>N<sub>2</sub>O<sup>35</sup>Cl requires  $M$ , 337.1108.

*N*-([3'',5''-Dimethylisoxazol-4''-yl)methyl)-2-(4'-chlorophenyl)-2-phenylacetamide **S33**

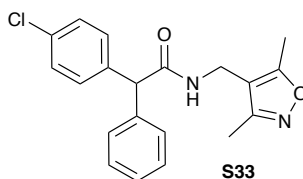

Obtained in 14% yield as a white solid. m.p. 169 – 171 °C;  $\nu_{\max}$  (ATR) 3290 (br), 3090 (w), 3044 (w), 2930 (w), 1647 (s), 1548 (m), 1491 (s), 1454 (m), 1200 (w), 1091 (w), 1015 (w)  $\text{cm}^{-1}$ ;  $\delta_{\text{H}}$  (600 MHz,  $\text{CDCl}_3$ ) 7.35 –

7.31 (2H, m, 3<sup>Ph</sup>-H<sub>2</sub>), 7.31 – 7.27 (3H, m, 3'-H<sub>2</sub>, 4<sup>Ph</sup>-H), 7.20 (2H, d, *J* = 7.5 Hz, 2<sup>Ph</sup>-H<sub>2</sub>), 7.17 (2H, d, *J* = 8.5 Hz, 2'-H<sub>2</sub>), 5.64 – 5.58 (1H, m, NH), 4.83 (1H, s, 2-H), 4.20 (2H, d, *J* = 5.5 Hz, NHCH<sub>2</sub>), 2.33 (3H, s, 5''-CH<sub>3</sub>), 2.11 (3H, s, 3''-CH<sub>3</sub>); δ<sub>c</sub> (151 MHz, CDCl<sub>3</sub>) 171.4 (C=O), 167.3 (C-5''), 159.4 (C-3''), 138.8 (C-1<sup>Ph</sup>), 137.6 (C-1'), 133.5 (C-4'), 130.3 (C-2'), 129.2 (C-3<sup>Ph</sup>), 129.1 (C-3'), 128.8 (C-2<sup>Ph</sup>), 127.9 (C-4<sup>Ph</sup>), 110.8 (C-4''), 58.5 (C-2), 32.5 (NHCH<sub>2</sub>), 11.2 (5''-CH<sub>3</sub>), 10.2 (3''-CH<sub>3</sub>); *m/z* (LCMS, ESI<sup>+</sup>) 355 (M(<sup>35</sup>Cl)H<sup>+</sup>), 357 (M(<sup>37</sup>Cl)H<sup>+</sup>); Accurate mass: Found MH<sup>+</sup>, 355.1203: C<sub>20</sub>H<sub>20</sub>N<sub>2</sub>O<sub>2</sub><sup>35</sup>Cl requires *M*, 355.1213.

*N*-([2''-[Piperazin-1'''-yl]eth-1''-yl]-2-(4'-chlorophenyl)-2-phenylacetamide **S34**

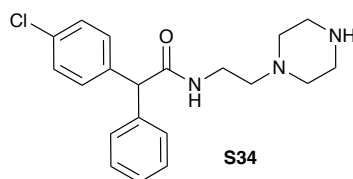

Obtained in 24% yield as a yellow oil. *v*<sub>max</sub> (ATR) 3298 (br), 3040 (w), 2942 (w), 2818 (w), 1649 (s), 1556 (m), 1490 (s), 1444 (w), 1320 (w), 1226 (w), 1139 (w), 1089 (w) cm<sup>-1</sup>; δ<sub>H</sub> (700 MHz, CDCl<sub>3</sub>) 7.35 – 7.31 (2H, m, 3<sup>Ph</sup>-H<sub>2</sub>), 7.31 – 7.27 (3H, m, 3'-H<sub>2</sub>, 4<sup>Ph</sup>-H), 7.25 – 7.22 (2H, m, 2<sup>Ph</sup>-H<sub>2</sub>), 7.22 – 7.20 (2H, m, 2'-H<sub>2</sub>), 6.30 – 6.21 (1H, m, NH), 4.90 (1H, s, 2-H), 3.39 – 3.30 (2H, m, 1''-H<sub>2</sub>), 2.76 – 2.66 (4H, m, 3'''-(H<sub>2</sub>)<sub>2</sub>), 2.40 (2H, app td, *J* = 6.0, 2.0 Hz, 2''-H<sub>2</sub>), 2.36 – 2.22 (4H, m, 2'''-(H<sub>2</sub>)<sub>2</sub>); δ<sub>c</sub> (176 MHz, CDCl<sub>3</sub>) 171.5 (C=O), 139.3 (C-1<sub>Ph</sub>), 138.3 (C-1'), 133.2 (C-4'), 130.5 (C-2'), 128.9(9) (C-3<sup>Ph</sup>), 128.9(6) (ArC), 128.9 (ArC), 127.6 (C-4<sup>Ph</sup>), 58.7 (C-2), 56.7 (C-2''), 54.2 (C-2'''), 46.2 (C-3'''), 36.1 (C-1'''); *m/z* (LCMS, ESI<sup>+</sup>) 358 (M(<sup>35</sup>Cl)H<sup>+</sup>), 360 (M(<sup>37</sup>Cl)H<sup>+</sup>); Accurate mass: Found MH<sup>+</sup>, 358.1681: C<sub>20</sub>H<sub>25</sub>N<sub>3</sub>O<sup>35</sup>Cl requires *M*, 358.1686.

*N*-([3'',5''-Dimethylpyrazol-4''-yl]methyl)-2-(4'-chlorophenyl)-2-phenylacetamide **S35**

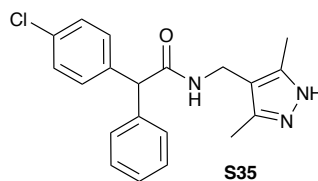

Obtained in 34% yield as a white solid. *m.p.* 177 – 178 °C; *v*<sub>max</sub> (ATR) 3262 (br), 3090 (w), 3032 (w), 2934 (w), 1637 (s), 1540 (m), 1494 (m), 1208 (m), 1090 (w) cm<sup>-1</sup>; δ<sub>H</sub> (700 MHz, CDCl<sub>3</sub>) 7.34 – 7.31 (2H, m, 3<sup>Ph</sup>-H<sub>2</sub>), 7.30 – 7.27 (3H, m, 3'-H<sub>2</sub>, 4<sup>Ph</sup>-H), 7.22 – 7.20 (2H, m, 2<sup>Ph</sup>-H<sub>2</sub>), 7.19 – 7.17 (2H, m, 2'-H<sub>2</sub>), 5.62 – 5.59 (1H, m, NH), 4.83 (1H, s, 2-H), 4.25 (2H, d, *J* = 5.2 Hz, NHCH<sub>2</sub>), 2.18 (6H, s, 3''-(CH<sub>3</sub>)<sub>2</sub>); δ<sub>c</sub> (176 MHz, CDCl<sub>3</sub>) 171.3 (C=O), 143.4 (C-3''), 139.0 (C-1<sup>Ph</sup>), 137.9 (C-1'), 133.4 (C-4'), 130.3 (C-2'), 129.1 (ArC), 129.0 (ArC), 128.8 (ArC), 127.8 (ArC), 112.8 (C-4''), 58.5 (C-2), 33.2 (NHCH<sub>2</sub>), 10.7 (3''-(CH<sub>3</sub>)<sub>2</sub>); *m/z* (LCMS, ESI<sup>+</sup>) 354 (M(<sup>35</sup>Cl)H<sup>+</sup>), 356 (M(<sup>37</sup>Cl)H<sup>+</sup>); Accurate mass: Found MH<sup>+</sup>, 354.1384: C<sub>20</sub>H<sub>21</sub>N<sub>3</sub>O<sup>35</sup>Cl requires *M*, 354.1373.

*N*-([1''-{1''',2''',4'''-Triazol-1'''-yl}phen-2''-yl)methyl)-2-(4'-chlorophenyl)-2-phenylacetamide **S36**

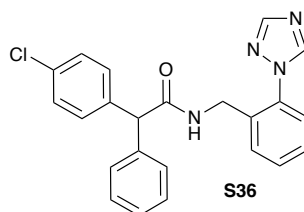

Obtained as a white solid. m.p. 137 – 139 °C;  $\nu_{\max}$  (ATR) 3286 (br), 3098 (w), 3044 (w), 2934 (w), 1662 (s), 1494 (s), 1352 (w), 1276 (m), 1215 (m)  $\text{cm}^{-1}$ ;  $\delta_{\text{H}}$  (700 MHz,  $\text{CHCl}_3$ ) 8.30 (1H, s, ArH), 7.90 (1H, s, ArH), 7.66 (1H, dd,  $J = 7.5, 1.5$  Hz, 3''-H), 7.47 (1H, td,  $J = 7.5, 1.5$  Hz, 4''-H), 7.43 (1H, td,  $J = 7.5, 1.5$  Hz, 5''-H), 7.32 – 7.24 (6H, m, ArH), 7.18 – 7.16 (2H, m, 2<sup>Ph</sup>-H<sub>2</sub>), 7.14 – 7.12 (2H, m, 2'-H<sub>2</sub>), 6.94 (1H, t,  $J = 6.5$  Hz, NH), 4.87 (1H, s, 2-H), 4.32 (2H, d,  $J = 6.5$  Hz, NHCH<sub>2</sub>);  $\delta_{\text{C}}$  (176 MHz,  $\text{CDCl}_3$ ) 171.4 (C=O), 152.5 (ArC), 143.8 (ArC), 139.1 (ArC), 138.1 (ArC), 135.9 (C-2''), 133.6 (C-1''), 133.2 (C-4'), 132.4 (C-3''), 130.4 (C-2'), 130.2 (C-4''), 129.1 (ArC), 128.9(74) (ArC), 128.9(67) (ArC), 128.9 (ArC), 127.5 (ArC), 124.9 (C-6''), 58.6 (C-2), 40.5 (NHCH<sub>2</sub>);  $m/z$  (LCMS, ESI<sup>+</sup>) 403 ( $\text{M}^{(35\text{Cl})\text{H}^+}$ ), 405 ( $\text{M}^{(37\text{Cl})\text{H}^+}$ ); Accurate mass: Found  $\text{MH}^+$ , 403.1327:  $\text{C}_{23}\text{H}_{20}\text{N}_4\text{O}^{35\text{Cl}}$  requires  $M$ , 403.1326.

*N*-(3''-[Thiophene-2'''-carboxamido]prop-1''-yl)-2-(4'-chlorophenyl)-2-phenylacetamide **S37**

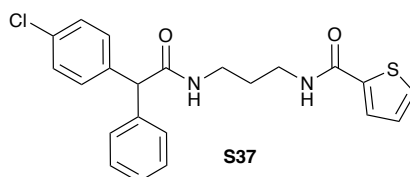

Obtained in 54% yield as a white solid. m.p. 164 – 165 °C;  $\nu_{\max}$  (ATR) 3304 (br), 3076 (w), 2938 (w), 1626 (s), 1543 (s), 1490 (s), 1446 (w), 1353 (w), 1303 (m), 1234 (w), 1090 (m), 1015 (m)  $\text{cm}^{-1}$ ;  $\delta_{\text{H}}$  (600 MHz,  $\text{CHCl}_3$ ) 7.53 (1H, dd,  $J = 3.5, 1.0$  Hz, 3'''-H), 7.47 – 7.43 (1H, m, 5'''-H), 7.34 – 7.31 (2H, m, 3<sup>Ph</sup>-H<sub>2</sub>), 7.29 – 7.24 (5H, m, 3'-H<sub>2</sub>, 2<sup>Ph</sup>-H<sub>2</sub>, 4<sup>Ph</sup>-H), 7.23 – 7.21 (2H, m, 2'-H<sub>2</sub>), 7.13 – 7.07 (1H, m, 3''-NH), 7.06 – 7.00 (1H, m, 4'''-H), 6.38 – 6.30 (1H, m, 1-NH), 4.89 (1H, s, 2-H), 3.40 – 3.33 (4H, m, 1''-H<sub>2</sub>, 3''-H<sub>2</sub>), 1.70 – 1.63 (2H, m, 2''-H<sub>2</sub>);  $\delta_{\text{C}}$  (151 MHz,  $\text{CDCl}_3$ ) 172.8 (C-1), 162.5 (2'''-CO), 139.3 (C-2'''), 139.0 (C-1<sup>Ph</sup>), 137.9 (C-1'), 133.4 (C-4'), 130.3 (C-2'), 130.2 (C-3<sup>Ph</sup>), 129.1 (ArC), 129.0 (ArC), 128.8 (C-2<sup>Ph</sup>), 128.1 (C-3'''), 127.8 (C-4'''), 127.7 (C-4<sup>Ph</sup>), 58.6 (C-2), 36.5 (C-1''), 36.1 (C-3''), 29.9 (C-2'');  $m/z$  (LCMS, ESI<sup>+</sup>) 413 ( $\text{M}^{(35\text{Cl})\text{H}^+}$ ), 415 ( $\text{M}^{(37\text{Cl})\text{H}^+}$ ); Accurate mass: Found  $\text{MH}^+$ , 413.1097:  $\text{C}_{22}\text{H}_{22}\text{N}_2\text{O}_2\text{S}^{35\text{Cl}}$  requires  $M$ , 413.1091.

*N*-[1'-(2'',2''-Difluoroethyl)piperidin-4'-yl]-2-(4'-chlorophenyl)-2-phenylacetamide **S38**

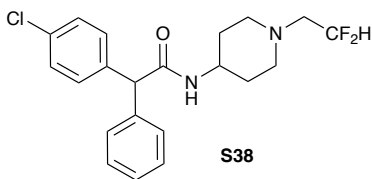

Obtained in 32% yield as an off-white solid. m.p. 143 – 145 °C;  $\nu_{\max}$  (ATR) 3296 (br), 3058 (w), 2946 (w), 2794 (w), 1639 (s), 1541 (m), 1489 (s), 1290 (w), 1125 (m), 1089 (m), 1049 (s), 1015 (m)  $\text{cm}^{-1}$ ;  $\delta_{\text{H}}$  (400 MHz,  $\text{CDCl}_3$ ) 7.36 – 7.26 (5H, m, ArH), 7.23 – 7.16 (4H, m, ArH), 5.84 (2H, tt,  $J = 56.0, 4.0$  Hz, 2''-H), 5.55 – 5.44 (1H, m, NH), 4.83 (1H, s, 2-H), 3.91 – 3.78 (1H, m, 4'-H), 2.90 – 2.79 (2H, m, 2'-H<sub>2</sub>H'<sub>2</sub>), 2.72 (2H, td,  $J = 15.0, 4.0$  Hz, 1''-H<sub>2</sub>), 2.38 – 2.27 (2H, m, 2'-H<sub>2</sub>H'<sub>2</sub>), 1.97 – 1.84 (2H, m, 3'-H<sub>2</sub>H'<sub>2</sub>), 1.48 – 1.32 (2H, m, 3'-H<sub>2</sub>H'<sub>2</sub>);  $\delta_{\text{C}}$  (101 MHz,  $\text{CDCl}_3$ ) 170.9 (C=O), 139.1 (ArC), 138.0 (ArC), 133.3 (ArC), 130.3 (ArC), 129.1 (ArC), 129.0 (ArC), 128.8 (ArC), 127.7 (ArC), 115.5 (t,  $J = 241.5$  Hz, C-2''), 59.9 (t,  $J = 25.0$  Hz, C-1''), 58.5 (C-2), 53.2 (C-2'), 46.3 (C-4'), 31.9 (C-3');  $\delta_{\text{F}}$  (376 MHz,  $\text{CDCl}_3$ ) -118.52 (dt,  $J = 56.0, 15.0$  Hz, 2''-F<sub>2</sub>);  $m/z$  (LCMS, ESI<sup>+</sup>) 393 (M(<sup>35</sup>Cl)H<sup>+</sup>), 395 (M(<sup>37</sup>Cl)H<sup>+</sup>); Accurate mass: Found MH<sup>+</sup>, 393.1546: C<sub>21</sub>H<sub>24</sub>N<sub>2</sub>OF<sub>2</sub><sup>35</sup>Cl requires  $M$ , 393.1545.

1-(4''-[Pyrimidin-2'''-yl]piperazin-1''-yl)-2-(4'-chlorophenyl)-2-phenylethan-1-one **S39**

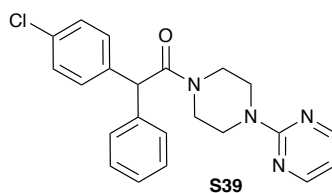

Obtained in 23% yield as an off-white solid. m.p. 150 – 152 °C;  $\nu_{\max}$  (ATR) 3020 (w), 2916 (w), 2856 (w), 1645 (s), 1582 (s), 1548 (s), 1489 (s), 1428 (s), 1392 (m), 1355 (m), 1307 (w), 1261 (m), 1222 (w), 1089 (w), 1032 (w)  $\text{cm}^{-1}$ ;  $\delta_{\text{H}}$  (600 MHz,  $\text{CDCl}_3$ ) 8.28 (2H, d,  $J = 4.5$  Hz, 4'''-H<sub>2</sub>), 7.33 (2H, t,  $J = 7.5$  Hz, 3<sup>Ph</sup>-H<sub>2</sub>), 7.29 – 7.22 (5H, m, 3'-H<sub>2</sub>, 2<sup>Ph</sup>-H<sub>2</sub>, 4<sup>Ph</sup>-H), 7.19 – 7.15 (2H, m, 2'-H<sub>2</sub>), 6.51 (1H, t,  $J = 4.5$  Hz, 5'''-H), 5.21 (1H, s, 2-H), 3.90 – 3.79 (2H, m, 2''-(HH')H<sub>2</sub>, 3''-(HH')(HH')), 3.78 – 3.73 (1H, m, 3''-(HH')(HH')), 3.70 (1H, ddd,  $J = 13.0, 7.5, 3.0$  Hz, 2''-(HH')H<sub>2</sub>), 3.64 (1H, dt,  $J = 13.0, 5.0$  Hz, 3''-(HH')(HH')), 3.51 (2H, t,  $J = 5.0$  Hz, 2''-(HH')H<sub>2</sub>), 3.45 (1H, dt,  $J = 13.0, 5.0$  Hz, 3''-(HH')(HH'));  $\delta_{\text{C}}$  (151 MHz,  $\text{CDCl}_3$ ) 170.2 (C=O), 161.6 (C-2'''), 157.9 (C-4'''), 138.8 (C-1<sup>Ph</sup>), 138.1 (C-1'), 133.2 (C-4'), 130.6 (C-2'), 129.0 (C-3<sup>Ph</sup>), 128.9 (ArC), 128.8 (ArC), 127.5 (C-4<sup>Ph</sup>), 110.6 (C-5'''), 54.5 (C-2), 45.9 (C-2''), 43.6 (C-3''), 42.22 (C-2'');  $m/z$  (LCMS, ESI<sup>+</sup>) 393 (M(<sup>35</sup>Cl)H<sup>+</sup>), 395 (M(<sup>37</sup>Cl)H<sup>+</sup>); Accurate mass: Found MH<sup>+</sup>, 393.1470: C<sub>22</sub>H<sub>22</sub>N<sub>4</sub>O<sup>35</sup>Cl requires  $M$ , 393.1482.

1-(4''-[2'''-Hydroxyethyl]piperazin-1''-yl)-2-(4'-chlorophenyl)-2-phenylethan-1-one **S40**

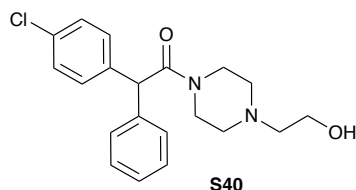

Obtained in 49% yield as a yellow oil.  $\nu_{\max}$  (ATR) 3412 (br), 2938 (w), 2868 (w), 2804 (w), 1638 (s), 1490 (m), 1434 (m), 1290 (w), 1223 (m), 1144 (w), 1087 (m), 1014 (m)  $\text{cm}^{-1}$ ;  $\delta_{\text{H}}$  (600 MHz,  $\text{CDCl}_3$ ) 7.35 – 7.31 (2H, m,  $3^{\text{Ph}}\text{-H}_2$ ), 7.29 – 7.26 (3H, m,  $3'\text{-H}_2$ ,  $4^{\text{Ph}}\text{-H}$ ), 7.22 – 7.20 (2H, m,  $2^{\text{Ph}}\text{-H}_2$ ), 7.16 – 7.13 (2H, m,  $2'\text{-H}_2$ ), 5.16 (1H, s,  $2\text{-H}$ ), 3.75 (1H, ddd,  $J = 13.5, 6.5, 3.5$  Hz,  $2''\text{-(HH')H}_2$ ), 3.67 (1H, ddd,  $J = 13.5, 6.5, 3.5$  Hz,  $2''\text{-(HH')H}_2$ ), 3.59 (2H, t,  $J = 5.5$  Hz,  $2'''\text{-H}_2$ ), 3.49 – 3.41 (2H, m,  $2''\text{-(HH')H}_2$ ), 2.53 – 2.42 (5H, m,  $3''\text{-H}_2(\text{HH}')$ ,  $1'''\text{-H}_2$ ,  $\text{OH}$ ), 2.32 – 2.25 (1H, m,  $3''\text{-H}_2(\text{HH}')$ ), 2.22 – 2.16 (1H, m,  $3''\text{-H}_2(\text{HH}')$ );  $\delta_{\text{C}}$  (151 MHz,  $\text{CDCl}_3$ ) 169.9 ( $\text{C=O}$ ), 138.9 ( $\text{C-1}^{\text{Ph}}$ ), 138.2 ( $\text{C-1}'$ ), 133.1 ( $\text{C-4}'$ ), 130.6 ( $\text{C-2}'$ ), 129.0 ( $\text{C-3}^{\text{Ph}}$ ), 128.9 ( $\text{C-2}^{\text{Ph}}$ ), 128.8 ( $\text{C-3}'$ ), 127.5 ( $\text{C-4}^{\text{Ph}}$ ), 59.3 ( $\text{C-1}''''$ ), 57.9 ( $\text{C-2}''''$ ), 54.3 ( $\text{C-2}$ ), 52.9 ( $\text{C-3}''$ ), 52.7 ( $\text{C-3}'''$ ), 46.1 ( $\text{C-2}''$ ), 42.4 ( $\text{C-2}''$ );  $m/z$  (LCMS,  $\text{ESI}^+$ ) 359 ( $\text{M}^{(35}\text{Cl})\text{H}^+$ ), 361 ( $\text{M}^{(37}\text{Cl})\text{H}^+$ ); Accurate mass: Found  $\text{MH}^+$ , 359.1532:  $\text{C}_{20}\text{H}_{24}\text{N}_2\text{O}_2^{35}\text{Cl}$  requires  $M$ , 359.1526.

1-(4''-[2'''-Methoxyethyl]piperazin-1''-yl)-2-(4'-chlorophenyl)-2-phenylethan-1-one **S41**

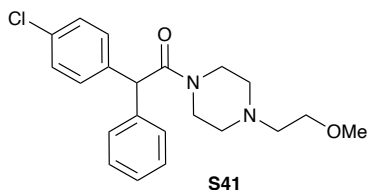

Obtained in 11% yield as a yellow oil.  $\nu_{\max}$  (ATR) 2928 (w), 2882 (w), 2808 (w), 1639 (s), 1490 (m), 1432 (m), 1308 (w), 1225 (w), 1113 (m), 1015 (m)  $\text{cm}^{-1}$ ;  $\delta_{\text{H}}$  (600 MHz,  $\text{CDCl}_3$ ) 7.32 – 7.29 (2H, m,  $3^{\text{Ph}}\text{-H}_2$ ), 7.27 – 7.22 (3H, m,  $3'\text{-H}_2$ ,  $4^{\text{Ph}}\text{-H}$ ), 7.21 – 7.18 (2H, m,  $2^{\text{Ph}}\text{-H}_2$ ), 7.14 – 7.11 (2H, m,  $2'\text{-H}_2$ ), 5.14 (1H, s,  $2\text{-H}$ ), 3.75 (1H, ddd,  $J = 13.0, 6.0, 3.5$  Hz,  $2''\text{-(HH')H}_2$ ), 3.66 (1H, ddd,  $J = 13.0, 7.0, 3.5$  Hz,  $2''\text{-(HH')H}_2$ ), 3.49 – 3.39 (2H, m,  $2''\text{-(HH')H}_2$ ), 3.45 (2H, t,  $J = 5.5$  Hz,  $2'''\text{-H}_2$ ), 3.31 (3H, s,  $\text{OCH}_3$ ), 2.50 (2H, t,  $J = 5.5$  Hz,  $1'''\text{-H}_2$ ), 2.46 (1H, ddd,  $J = 11.0, 6.5, 3.5$  Hz,  $3''\text{-(HH')H}_2$ ), 2.42 (1H, ddd,  $J = 11.0, 7.0, 3.5$  Hz,  $3''\text{-(HH')H}_2$ ), 2.26 (1H, ddd,  $J = 11.0, 6.5, 3.5$  Hz,  $3''\text{-(HH')H}_2$ ), 2.16 (1H, ddd,  $J = 11.0, 6.0, 4.0$  Hz,  $3''\text{-(HH')H}_2$ );  $\delta_{\text{C}}$  (151 MHz,  $\text{CDCl}_3$ ) 169.8 ( $\text{C=O}$ ), 139.0 ( $\text{C-1}^{\text{Ph}}$ ), 138.3 ( $\text{C-1}'$ ), 133.0 ( $\text{C-4}'$ ), 130.6 ( $\text{C-2}'$ ), 128.8(8) (ArC), 128.8(7) (ArC), 128.7 ( $\text{C-3}'$ ), 127.4 ( $\text{C-4}^{\text{Ph}}$ ), 70.1 ( $\text{C-2}''''$ ), 59.0 ( $\text{OCH}_3$ ), 57.9 ( $\text{C-1}''''$ ), 54.2 ( $\text{C-2}$ ), 53.5 ( $\text{C-3}''$ ), 53.2 ( $\text{C-3}''$ ), 46.0 ( $\text{C-2}''$ ), 42.2 ( $\text{C-2}''$ );  $m/z$  (LCMS,  $\text{ESI}^+$ ) 373 ( $\text{M}^{(35}\text{Cl})\text{H}^+$ ), 375 ( $\text{M}^{(37}\text{Cl})\text{H}^+$ ); Accurate mass: Found  $\text{MH}^+$ , 373.1671:  $\text{C}_{21}\text{H}_{26}\text{N}_2\text{O}_2^{35}\text{Cl}$  requires  $M$ , 373.1683.

*N*-Methyl-*N*-([1''-difluoromethylimidazol-2''-yl]methyl)-2-(4'-chlorophenyl)-2-phenylacetamide **S42**

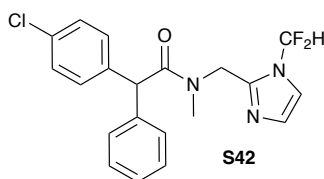

Obtained in 47% yield as a colourless oil.  $\nu_{\max}$  (ATR) 3136 (w), 2942 (w), 1639 (s), 1489 (s), 1460 (m), 1416 (m), 1348 (w), 1273 (s), 1192 (w), 1160 (m), 1091 (s), 1047 (s)  $\text{cm}^{-1}$ ;  $\delta_{\text{H}}$  (600 MHz,  $\text{CDCl}_3$ ) 7.77 (1H, t,  $J = 59.0$  Hz,  $\text{CHF}_2$ ), 7.34 – 7.30 (2H, m,  $3^{\text{Ph}}\text{-H}_2$ ), 7.29 – 7.26 (4H, m,  $3'\text{-H}_2$ ,  $4^{\text{Ph}}\text{-H}$ ,  $5''\text{-H}$ ), 7.18 – 7.14 (2H, m,  $2^{\text{Ph}}\text{-H}_2$ ), 7.12 – 7.08 (2H, m,  $2'\text{-H}_2$ ), 7.04 (1H, d,  $J = 1.5$  Hz,  $4''\text{-H}$ ), 5.17 (1H, s,  $2\text{-H}$ ), 4.78 (1H, d,  $J = 15.0$  Hz,  $\text{N}(\text{CH}_3)\text{CHH}'$ ), 4.72 (1H, d,  $J = 15.0$  Hz,  $\text{N}(\text{CH}_3)\text{CHH}'$ ), 3.05 (3H, s,  $\text{NCH}_3\text{CHH}'$ );  $\delta_{\text{C}}$  (151 MHz,  $\text{CDCl}_3$ ) 172.2 ( $\text{C}=\text{O}$ ), 143.1 ( $\text{C}-2''$ ), 138.1 ( $\text{C}-1^{\text{Ph}}$ ), 137.4 ( $\text{C}-1'$ ), 133.4 ( $\text{C}-4'$ ), 130.4 ( $\text{C}-2'$ ), 129.7 ( $\text{C}-4''$ ), 129.1 ( $\text{C}-3^{\text{Ph}}$ ), 128.9 ( $\text{C}-3'$ ), 128.7 ( $\text{C}-2^{\text{Ph}}$ ), 127.7 ( $\text{C}-4^{\text{Ph}}$ ), 116.1 ( $\text{C}-5''$ ), 108.4 (t,  $J = 250.0$  Hz,  $\text{CHF}_2$ ), 54.3 ( $\text{C}-2$ ), 43.4 ( $\text{N}(\text{CH}_3)\text{CHH}'$ ), 35.3 ( $\text{NCH}_3\text{CHH}'$ );  $\delta_{\text{F}}$  (376 MHz,  $\text{CDCl}_3$ ) -91.65 (dd,  $J = 231.5$ , 59.0 Hz,  $\text{CHFF}'$ ), -92.72 (dd,  $J = 231.5$ , 59.0 Hz,  $\text{CHFF}'$ );  $m/z$  (LCMS,  $\text{ESI}^+$ ) 390 ( $\text{M}^{(35}\text{Cl})\text{H}^+$ ), 392 ( $\text{M}^{(37}\text{Cl})\text{H}^+$ ); Accurate mass: Found  $\text{MH}^+$ , 390.1181;  $\text{C}_{20}\text{H}_{19}\text{N}_3\text{OF}_2^{35}\text{Cl}$  requires  $M$ , 390.1185.

*N*-Methyl-*N*-([1''-methylpyrazol-4''-yl]methyl)-2-(4'-chlorophenyl)-2-phenylacetamide **S43**

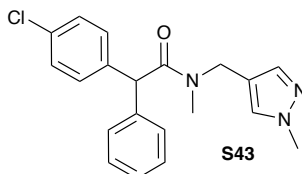

Obtained in 38% yield as a colourless oil.  $\nu_{\max}$  (ATR) 3050 (w), 2932 (w), 2868 (w), 1639 (s), 1489 (s), 1446 (m), 1394 (s), 1334 (w), 1252 (w), 1161 (m), 1088 (m), 1015 (m)  $\text{cm}^{-1}$ ;  $\delta_{\text{H}}$  (600 MHz,  $\text{CDCl}_3$ , mixture of rotamers) 7.39 (0.7H, s,  $3''\text{-H}$  rotamer A), 7.33 (0.7H, s,  $5''\text{-H}$  rotamer A), 7.32 – 7.28 (2H, m,  $3^{\text{Ph}}\text{-H}_2$ ), 7.28 – 7.22 (3.6H, m,  $3'\text{-H}_2$ ,  $2^{\text{Ph}}\text{-H}_2$  rotamer B,  $4^{\text{Ph}}\text{-H}$ ), 7.21 (0.3H, s,  $3''\text{-H}$  rotamer B), 7.22 – 7.17 (1.4H, m,  $2^{\text{Ph}}\text{-H}_2$  rotamer A), 7.16 – 7.14 (0.6H, m,  $2'\text{-H}_2$  rotamer B), 7.15 – 7.12 (1.4H, m,  $2'\text{-H}_2$  rotamer A), 6.90 (0.3H, s,  $5''\text{-H}$  rotamer B), 5.25 (0.3H, s,  $2\text{-H}$  rotamer B), 5.13 (0.7H, s,  $2\text{-H}$  rotamer A), 4.45 (0.7H, d,  $J = 14.5$  Hz,  $\text{N}(\text{CH}_3)\text{CHH}'$  rotamer A), 4.41 (0.7H, d,  $J = 14.5$  Hz,  $\text{N}(\text{CH}_3)\text{CHH}'$  rotamer A), 4.37 (0.6H, s,  $\text{N}(\text{CH}_3)\text{CH}_2$  rotamer B), 3.85 (2.1H, s,  $1''\text{-CH}_3$  rotamer A), 3.83 (0.9H, s,  $1''\text{-CH}_3$  rotamer B), 2.98 (0.9H, s,  $\text{NCH}_3\text{CH}_2$  rotamer B), 2.92 (2.1H, s,  $\text{NCH}_3\text{CHH}'$  rotamer A);  $\delta_{\text{C}}$  (151 MHz,  $\text{CDCl}_3$ , mixture of rotamers) 171.2 ( $\text{C}=\text{O}$ ), 139.3 ( $\text{C}-3''$  rotamer A), 139.1 ( $\text{C}-1^{\text{Ph}}$  rotamer B), 138.9 ( $\text{C}-1^{\text{Ph}}$  rotamer A), 138.4 ( $\text{C}-1'$  rotamer B), 138.2 ( $\text{C}-1'$  rotamer A), 138.1 ( $\text{C}-3''$  rotamer B), 133.1 ( $\text{C}-4'$  rotamer B), 133.0 ( $\text{C}-4'$  rotamer A), 130.5(7) ( $\text{C}-2'$  rotamer B), 130.5(5) ( $\text{C}-2'$  rotamer A), 130.0 ( $\text{C}-5''$  rotamer A), 129.0 (ArC), 128.9(1) (ArC), 128.8(8) (ArC), 128.8(5) (ArC), 128.7 (ArC), 128.5 ( $\text{C}-5''$  rotamer B), 127.5 (ArC), 127.4 (ArC), 117.4 ( $\text{C}-4''$  rotamer B), 117.3



(C-4'' rotamer A), 54.4 (C-2 rotamer A), 54.1 (C-2 rotamer B), 44.8 (N(CH<sub>3</sub>)CH<sub>2</sub> rotamer B), 42.4 (N(CH<sub>3</sub>)CHH' rotamer A), 39.2 (1''-CH<sub>3</sub> rotamer B), 39.0 (1''-CH<sub>3</sub> rotamer A), 35.3 (N(CH<sub>3</sub>)CHH' rotamer A), 34.1 (N(CH<sub>3</sub>)CH<sub>2</sub> rotamer B); *m/z* (LCMS, ESI<sup>+</sup>) 354 (M(<sup>35</sup>Cl)H<sup>+</sup>), 356 (M(<sup>37</sup>Cl)H<sup>+</sup>); Accurate mass: Found MH<sup>+</sup>, 354.1367; C<sub>20</sub>H<sub>21</sub>N<sub>3</sub>O<sup>35</sup>Cl requires *M*, 354.1373.

*N*-Methyl-*N*-([pyridin-3''-yl]methyl)-2-(4'-chlorophenyl)-2-phenylacetamide **S44**

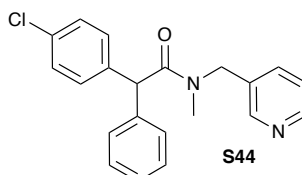

Obtained in 20% yield as a colourless oil.  $\nu_{\max}$  (ATR) 3036 (w), 2932 (w), 1642 (s), 1489 (m), 1396 (m), 1270 (w), 1174 (w), 1089 (m), 1015 (w) cm<sup>-1</sup>;  $\delta_{\text{H}}$  (600 MHz, CDCl<sub>3</sub>, mixture of rotamers) 8.59 – 8.56 (0.3H, m, 6''-H rotamer B), 8.54 – 8.51 (0.7H, m, 6''-H rotamer A), 8.51 – 8.47 (0.7H, m, 2''-H rotamer A), 8.44 – 8.42 (0.3H, m, 2''-H rotamer B), 7.63 – 7.58 (0.7H, m, 4''-H rotamer A), 7.38 – 7.34 (0.3H, m, 4''-H rotamer B), 7.34 – 7.29 (2H, m, 3<sup>Ph</sup>-H<sub>2</sub>), 7.29 – 7.24 (4H, m, 3'-H<sub>2</sub>, 4<sup>Ph</sup>-H, 5''-H), 7.23 – 7.22 (1.4H, m, 2<sup>Ph</sup>-H<sub>2</sub> rotamer A), 7.23 – 7.19 (0.6H, m, 2<sup>Ph</sup>-H<sub>2</sub> rotamer B), 7.19 – 7.15 (1.4H, m, 2'-H<sub>2</sub> rotamer A), 7.14 – 7.10 (0.6H, m, 2'-H<sub>2</sub> rotamer B), 5.20 (0.7H, s, 2-H rotamer A), 5.11 (0.3H, s, 2-H rotamer B), 4.66 (0.7H, d, *J* = 15.0 Hz, N(CH<sub>3</sub>)CHH' rotamer A), 4.60 (0.7H, d, *J* = 15.0 Hz, N(CH<sub>3</sub>)CHH' rotamer A), 4.58 (0.3H, d, *J* = 17.0 Hz, N(CH<sub>3</sub>)CHH' rotamer B), 4.51 (0.3H, d, *J* = 17.0 Hz, N(CH<sub>3</sub>)CHH' rotamer B), 3.02 (0.9H, s, N(CH<sub>3</sub>)CHH' rotamer B), 2.94 (2.1H, s, N(CH<sub>3</sub>)CHH' rotamer A);  $\delta_{\text{C}}$  (151 MHz, CDCl<sub>3</sub>, mixture of rotamers) 171.8(4) (C=O rotamer A), 171.8(2) (C=O rotamer B), 149.6 (C-2'' rotamer A), 149.5 (C-6'' rotamer B), 149.2 (C-6'' rotamer A), 148.4 (C-2'' rotamer B), 138.7 (C-1<sup>Ph</sup> rotamer B), 138.6 (C-1<sup>Ph</sup> rotamer A), 138.0 (C-1'), 136.1 (C-4'' rotamer A), 134.0 (C-4'' rotamer B), 133.3 (C-4' rotamer B), 133.2 (C-4' rotamer A), 132.9 (C-3'' rotamer A), 132.2 (C-3'' rotamer B), 130.5(0) (C-2' rotamer A), 130.4(5) (C-2' rotamer B), 129.1 (ArC), 129.0 (ArC), 128.8(1) (ArC), 128.7(8) (ArC), 127.7 (ArC), 127.5 (ArC), 123.9 (C-5'' rotamer B), 123.8 (C-5'' rotamer A), 54.4 (C-2 rotamer A), 54.3 (C-2 rotamer B), 51.3 (N(CH<sub>3</sub>)CHH' rotamer B), 49.4 (N(CH<sub>3</sub>)CHH' rotamer A), 35.5 (N(CH<sub>3</sub>)HH' rotamer A), 34.8 (N(CH<sub>3</sub>)HH' rotamer B); *m/z* (LCMS, ESI<sup>+</sup>) 351 (M(<sup>35</sup>Cl)H<sup>+</sup>), 353 (M(<sup>37</sup>Cl)H<sup>+</sup>); Accurate mass: Found MH<sup>+</sup>, 351.1259; C<sub>21</sub>H<sub>20</sub>N<sub>2</sub>O<sup>35</sup>Cl requires *M*, 351.1264.

*N*-Methyl-*N*-([3''-fluoropyridin-2''-yl]methyl)-2-(4'-chlorophenyl)-2-phenylacetamide **S45**

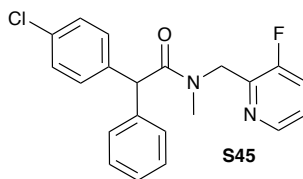

Obtained in 43% yield as colourless oil.  $\nu_{\max}$  (ATR) 3058 (w), 2928 (w), 1647 (s), 1489 (m), 1443 (s), 1396 (m), 1243 (w), 1159 (w), 1090 (m), 1015 (w)  $\text{cm}^{-1}$ ;  $\delta_{\text{H}}$  (600 MHz,  $\text{CDCl}_3$ , mixture of rotamers) 8.45 (0.5H, dt,  $J = 5.0, 1.5$  Hz, 6''-H rotamer A), 8.34 (0.5H, dt,  $J = 5.0, 1.5$  Hz, 6''-H rotamer B), 7.40 (0.5H, ddd,  $J = 9.5, 8.5, 1.5$  Hz, 4''-H rotamer A), 7.34 (0.5H, ddd,  $J = 9.5, 8.5, 1.5$  Hz, 4''-H rotamer B), 7.32 – 7.28 (2.5H, m, 5''-H rotamer A, 3<sup>Ph</sup>-H<sub>2</sub>), 7.27 – 7.22 (5H, m, 3'-H<sub>2</sub>, 2<sup>Ph</sup>-H<sub>2</sub>, 4<sup>Ph</sup>-H), 7.22 – 7.18 (1.5H, m, 2'-H<sub>2</sub> rotamer B, 5''-H rotamer B), 7.18 – 7.16 (1H, m, 2'-H<sub>2</sub> rotamer A), 5.60 (0.5H, s, 2-H rotamer A), 5.27 (0.5H, s, 2-H rotamer B), 4.89 (0.5H, dd,  $J = 15.5, 2.0$  Hz, N(CH<sub>3</sub>)CHH' rotamer B), 4.79 (0.5H, dd,  $J = 15.5, 1.5$  Hz, N(CH<sub>3</sub>)CHH' rotamer B), 4.70 (0.5H, dd,  $J = 16.5, 1.5$  Hz, N(CH<sub>3</sub>)CHH' rotamer A), 4.54 (0.5H, dd,  $J = 16.5, 1.5$  Hz, N(CH<sub>3</sub>)CHH' rotamer A), 3.08 (1.5H, s, N(CH<sub>3</sub>)CHH' rotamer B), 3.04 (1.5H, s, N(CH<sub>3</sub>)CHH' rotamer A);  $\delta_{\text{C}}$  (151 MHz,  $\text{CDCl}_3$ , mixture of rotamers) 172.6 (C=O rotamer A), 171.8 (C=O rotamer B), 157.9 (d,  $J = 258.5$  Hz, C-3'' rotamer B), 157.7 (d,  $J = 257.5$  Hz, C-3'' rotamer A), 145.7 (d,  $J = 5.5$  Hz, C-6'' rotamer A), 145.2 (d,  $J = 14.5$  Hz, C-2'' rotamer B), 145.0 (d,  $J = 5.5$  Hz, C-6'' rotamer B), 144.5 (d,  $J = 14.5$  Hz, C-2'' rotamer A), 139.2 (C-1<sup>Ph</sup> rotamer A), 139.1 (C-1<sup>Ph</sup> rotamer B), 138.7 (C-1' rotamer A), 138.4 (C-1' rotamer B), 132.9(3) (C-4' rotamer B), 132.8(6) (C-4' rotamer A), 130.8 (C-2' rotamer B), 130.7 (C-2' rotamer A), 129.2 (ArC), 129.0 (ArC), 128.8 (C-3<sup>Ph</sup>), 128.7 (C-3<sup>Ph</sup>), 128.6(1) (ArC), 128.5(8) (ArC), 127.3 (ArC), 124.6 (d,  $J = 3.5$  Hz, C-5'' rotamer A), 123.8 (d,  $J = 3.5$  Hz, C-5'' rotamer B), 123.3 (d,  $J = 19.0$  Hz, C-4'' rotamer A), 122.9 (d,  $J = 18.5$  Hz, C-4'' rotamer B), 54.4 (C-2 rotamer B), 53.8 (C-2 rotamer A), 49.4 (d,  $J = 1.5$  Hz, N(CH<sub>3</sub>)CHH' rotamer A), 48.1 (d,  $J = 1.0$  Hz, N(CH<sub>3</sub>)CHH' rotamer B), 36.8 (N(CH<sub>3</sub>)CHH' rotamer B), 35.2 (N(CH<sub>3</sub>)CHH' rotamer A);  $\delta_{\text{F}}$  (376 MHz,  $\text{CDCl}_3$ ) -125.79 (3''-F);  $m/z$  (LCMS, ESI<sup>+</sup>) 369 (M(<sup>35</sup>Cl)H<sup>+</sup>), 371 (M(<sup>37</sup>Cl)H<sup>+</sup>); Accurate mass: Found MH<sup>+</sup>, 369.1154: C<sub>21</sub>H<sub>19</sub>N<sub>2</sub>OF<sup>35</sup>Cl requires  $M$ , 369.1170.

*N*-Methyl-*N*-(2''-[morpholin-4'''-yl]eth-1''-yl)-2-(4'-chlorophenyl)-2-phenylacetamide **S46**

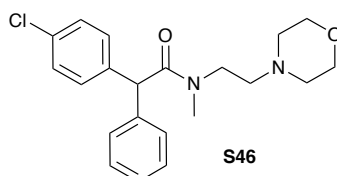

Obtained in 12% yield as a yellow oil.  $\nu_{\max}$  (ATR) 2958 (w), 2855 (w), 2812 (w), 1643 (s), 1489 (m), 1456 (w), 1399 (m), 1304 (w), 1260 (w), 1152 (w), 1116 (s), 1015 (w)  $\text{cm}^{-1}$ ;  $\delta_{\text{H}}$  (600 MHz,  $\text{CDCl}_3$ , mixture of rotamers) 7.34 – 7.30 (2H, m, 3<sup>Ph</sup>-H<sub>2</sub>), 7.28 – 7.23 (5H, m, 3'-H<sub>2</sub>, 2<sup>Ph</sup>-H<sub>2</sub>, 4<sup>Ph</sup>-H), 7.19 – 7.15 (2H, m, 2'-H<sub>2</sub>),

5.28 (0.3H, s, 2-**H** rotamer B), 5.18 (0.7H, s, 2-**H** rotamer A), 3.71 – 3.64 (4H, m, 2'''-(**H**<sub>2</sub>)<sub>2</sub>), 3.60 (0.7H, dt, *J* = 13.5, 6.5 Hz, 1''-**HH'** rotamer A), 3.53 (0.7H, dt, *J* = 13.5, 6.5 Hz, 1''-**HH'** rotamer A), 3.43 (0.3H, ddd, *J* = 14.5, 7.5, 6.0 Hz, 1''-**HH'** rotamer B), 3.36 (0.3H, ddd, *J* = 14.5, 7.5, 6.0 Hz, 1''-**HH'** rotamer B), 3.01 (0.9H, s, **NCH**<sub>3</sub> rotamer B), 2.99 (2.1H, s, **NCH**<sub>3</sub> rotamer A), 2.51 (1.4H, t, *J* = 6.5 Hz, 2''-**H**<sub>2</sub> rotamer A), 2.52 – 2.45 (2.8H, m, 3'''-(**H**<sub>2</sub>)<sub>2</sub> rotamer A), 2.45 (0.3H, ddd, *J* = 13.0, 7.5, 6.0 Hz, 2''-**HH'** rotamer B), 2.42 – 2.39 (1.2H, m, 3'''-(**H**<sub>2</sub>)<sub>2</sub> rotamer B), 2.37 (0.3H, ddd, *J* = 13.0, 7.5, 6.0 Hz, 2''-**HH'** rotamer B); δ<sub>c</sub> (151 MHz, CDCl<sub>3</sub>, mixture of rotamers) 171.5 (**C=O** rotamer B), 171.4 (**C=O** rotamer A), 139.2 (**C-1<sup>Ph</sup>** rotamer B), 139.0 (**C-1<sup>Ph</sup>** rotamer A), 138.6 (**C-1'** rotamer B), 138.4 (**C-1'** rotamer A), 133.0(4) (**C-4'** rotamer B), 132.9(7) (**C-4'** rotamer A), 130.7 (**C-2'** rotamer A), 130.5 (**C-2'** rotamer B), 129.0 (**ArC**), 128.9 (**ArC**), 128.8(4) (**ArC**), 128.8(0) (**ArC**), 128.7(0) (**ArC**), 128.6(6) (**ArC**), 127.4 (**ArC**), 127.3 (**ArC**), 67.2 (**C-2'''** rotamer A), 67.0 (**C-2'''** rotamer B), 57.3 (**C-2''** rotamer B), 55.8 (**C-2''** rotamer A), 54.5 (**C-2** rotamer A), 54.2 (**C-3'''** rotamer B), 53.8(9) (**C-3'''** rotamer A), 53.8(6) (**C-2** rotamer B), 47.6 (**C-1''** rotamer B), 45.3 (**C-1''** rotamer A), 36.2 (**NCH**<sub>3</sub> rotamer A), 34.6 (**NCH**<sub>3</sub> rotamer B); *m/z* (LCMS, ESI<sup>+</sup>) 373 (M(<sup>35</sup>Cl)H<sup>+</sup>), 375 (M(<sup>37</sup>Cl)H<sup>+</sup>); Accurate mass: Found MH<sup>+</sup>, 373.1673: C<sub>21</sub>H<sub>26</sub>N<sub>2</sub>O<sub>2</sub><sup>35</sup>Cl requires *M*, 373.1683.

*N*-(1'',3''-Dihydro-2''-[2'''-fluoroethyl]isoindol-5''-yl)-2-(4'-chlorophenyl)-2-phenylacetamide **S47**

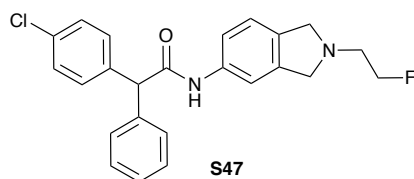

Obtained in 9% yield as a brown oil. ν<sub>max</sub> (ATR) 3274 (br), 3054 (w), 2946 (w), 2808 (w), 1661 (s), 1602 (w), 1550 (m), 1491 (s), 1442 (w), 1364 (w), 1210 (w), 1096 (w), 1032 (w) cm<sup>-1</sup>; δ<sub>H</sub> (700 MHz, CDCl<sub>3</sub>) 7.48 (1H, d, *J* = 2.0 Hz, 4''-**H**), 7.38 – 7.35 (2H, m, 3<sup>Ph</sup>-**H**<sub>2</sub>), 7.33 – 7.31 (3H, m, 3'-**H**<sub>2</sub>, 4<sup>Ph</sup>-**H**), 7.31 – 7.29 (2H, m, 2<sup>Ph</sup>-**H**<sub>2</sub>), 7.26 – 7.24 (2H, m, 2'-**H**<sub>2</sub>), 7.13 (1H, dd, *J* = 8.0, 2.0 Hz, 6''-**H**), 7.10 (1H, d, *J* = 8.0 Hz, 7''-**H**), 5.01 (1H, s, 2-**H**), 4.62 (2H, dt, *J* = 47.5, 5.0 Hz, 2'''-**H**<sub>2</sub>), 3.97 (4H, s, 3''-**H**<sub>2</sub>, 1''-**H**<sub>2</sub>), 3.04 (2H, dt, *J* = 28.0, 5.0 Hz, 1'''-**H**<sub>2</sub>); δ<sub>c</sub> (176 MHz, CDCl<sub>3</sub>) 169.7 (**C=O**), 141.1 (**C-5''**), 138.8 (**C-1<sup>Ph</sup>**), 137.7 (**C-1'**), 136.5(0) (**ArC**), 136.4(9) (**ArC**), 133.6 (**C-4'**), 130.5 (**C-2'**), 129.3 (**C-3<sup>Ph</sup>**), 129.1 (**C-3'**), 129.0 (**C-2<sup>Ph</sup>**), 127.9 (**C-4<sup>Ph</sup>**), 122.7 (**C-7''**), 118.7 (**C-6''**), 114.4 (**C-4''**), 83.4 (d, *J* = 167.5 Hz, **C-2'''**), 59.7 (**C-3''**), 59.4 (**C-2**), 59.3 (**C-1''**), 55.6 (d, *J* = 19.5 Hz, **C-1'''**); δ<sub>F</sub> (376 MHz, CDCl<sub>3</sub>) -220.22 – -220.69 (m, 2'''-**F**); *m/z* (LCMS, ESI<sup>+</sup>) 409 (M(<sup>35</sup>Cl)H<sup>+</sup>), 411 (M(<sup>37</sup>Cl)H<sup>+</sup>); Accurate mass: Found MH<sup>+</sup>, 409.1476: C<sub>24</sub>H<sub>23</sub>N<sub>2</sub>OF<sup>35</sup>Cl requires *M*, 409.1483.

*N*-([Pyrrolidin-2''-yl]methyl)-1-(4'-fluorophenyl)cyclopropane-1-carboxamide **S48**

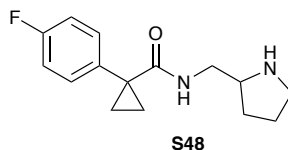

Obtained in 50% yield as a yellow gum.  $\nu_{\max}$  (ATR) 3326 (br), 2958 (w), 2832 (w), 1658 (m), 1511 (s), 1408 (m), 1214 (m)  $\text{cm}^{-1}$ ;  $\delta_{\text{H}}$  (700 MHz,  $\text{CDCl}_3$ ) 7.37 (2H, dd,  $J = 8.5, 5.5$  Hz, 2'- $\text{H}_2$ ), 7.04 (2H, t,  $J = 8.5$  Hz, 3'- $\text{H}_2$ ), 5.76 – 5.70 (1H, m, NH), 3.24 (1H, ddd,  $J = 13.0, 6.0, 4.5$  Hz, NHCHH'), 3.16 (1H, qd,  $J = 7.0, 4.5$  Hz, 2''-H), 3.00 (1H, ddd,  $J = 13.0, 7.0, 5.5$  Hz, NHCHH'), 2.81 (1H, ddd,  $J = 10.5, 7.5, 6.0$  Hz, 5''-HH'), 2.73 (1H, dt,  $J = 10.5, 6.5$  Hz, 5''-HH'), 1.81 – 1.73 (1H, m, 1''-H), 1.80 – 1.72 (1H, m, 3''-HH'), 1.68 – 1.60 (2H, m, 4''- $\text{H}_2$ ), 1.61 – 1.56 (2H, m, 2- $\text{H}_2\text{H}'_2$ ), 1.26 (1H, ddt,  $J = 13.0, 8.5, 7.0$  Hz, 3''-HH'), 1.02 – 0.98 (2H, m, 2- $\text{H}_2\text{H}'_2$ );  $\delta_{\text{C}}$  (176 MHz,  $\text{CDCl}_3$ ) 173.9 (C=O), 162.3 (d,  $J = 247.5$  Hz, C-4'), 135.9 (d,  $J = 3.5$  Hz, C-1'), 132.8 (d,  $J = 8.0$  Hz, C-2'), 116.0 (d,  $J = 21.5$  Hz, C-3'), 57.4 (C-2''), 46.7 (C-5''), 44.8 (NHCHH'), 29.9 (C-1), 29.1 (C-3''), 26.0 (C-4''), 15.8 (C-2), 15.7 (C-2);  $\delta_{\text{F}}$  (376 MHz,  $\text{CDCl}_3$ ) -114.22 – -114.31 (m, 4'-F);  $m/z$  (LCMS,  $\text{ESI}^+$ ) 263 ( $\text{MH}^+$ ); Accurate mass: Found  $\text{MH}^+$ , 263.1566:  $\text{C}_{15}\text{H}_{20}\text{N}_2\text{OF}$  requires  $M$ , 263.1560.

*N*-([Pyrrolidin-2'-yl]methyl)-1-methyl-4-phenyl-piperidine-4-carboxamide **S49**

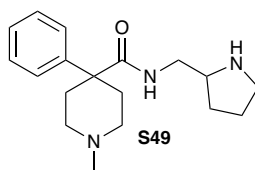

Obtained in 50% yield as a yellow oil.  $\nu_{\max}$  (ATR) 3308 (br), 2946 (m), 2798 (w), 1640 (s), 1532 (s), 1450 (m), 1412 (w), 1290 (m)  $\text{cm}^{-1}$ ;  $\delta_{\text{H}}$  (700 MHz,  $\text{CDCl}_3$ ) 7.40 – 7.37 (2H, m, 2<sup>Ph</sup>- $\text{H}_2$ ), 7.34 (2H, t,  $J = 7.5$  Hz, 3<sup>Ph</sup>- $\text{H}_2$ ), 7.27 – 7.22 (1H, m, 4<sup>Ph</sup>-H), 5.95 – 5.88 (1H, m, NH), 3.28 (1H, ddd,  $J = 13.0, 5.0, 4.5$  Hz, NHCHH'), 3.14 (1H, qd,  $J = 7.0, 4.5$  Hz, 2'-H), 2.99 (1H, ddd,  $J = 13.0, 7.0, 5.5$  Hz, NHCHH'), 2.79 (1H, dt,  $J = 10.5, 7.0$  Hz, 5'-HH'), 2.69 (1H, dt,  $J = 10.5, 6.5$  Hz, 5'-HH'), 2.66 – 2.52 (2H, m, 2- $\text{H}_2\text{H}'_2$ ), 2.47 – 2.43 (2H, m, 3- $\text{H}_2\text{H}'_2$ ), 2.43 – 2.35 (2H, m, 2- $\text{H}_2\text{H}'_2$ ), 2.25 (3H, s,  $\text{NCH}_3$ ), 2.14 – 2.06 (2H, m, 3- $\text{H}_2\text{H}'_2$ ), 1.71 (1H, dq,  $J = 12.5, 7.0$  Hz, 3'-HH'), 1.57 (2H, dtd,  $J = 7.5, 7.0, 6.5$  Hz, 4'- $\text{H}_2$ ), 1.17 (1H, dtd,  $J = 12.5, 7.5, 7.0$  Hz, 3'-HH');  $\delta_{\text{C}}$  (176 MHz,  $\text{CDCl}_3$ ) 174.9 (C=O), 143.6 (C-1<sup>Ph</sup>), 128.9 (C-3<sup>Ph</sup>), 127.0 (C-4<sup>Ph</sup>), 126.2 (C-2<sup>Ph</sup>), 57.4 (C-2'), 53.0 (C-2), 48.7 (C-4), 46.7 (C-5'), 46.4 ( $\text{NCH}_3$ ), 43.9 (NHCHH'), 34.2 (C-3), 28.9 (C-3'), 26.0 (C-4');  $m/z$  (LCMS,  $\text{ESI}^+$ ) 302 ( $\text{MH}^+$ ); Accurate mass: Found  $\text{MH}^+$ , 302.2239:  $\text{C}_{18}\text{H}_{28}\text{N}_3\text{O}$  requires  $M$ , 302.2232.

*N*-([Pyrrolidin-2''-yl]methyl)-2-(pyridin-3'-yl)acetamide **S50**

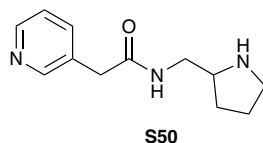

Obtained in 30% yield as a yellow oil.  $\nu_{\max}$  (ATR) 3262 (br), 3034 (w), 2950 (w), 2870 (w), 1650 (s), 1558 (s), 1524 (s), 1478 (w), 1432 (s), 1406 (s), 1360 (m), 1192 (w)  $\text{cm}^{-1}$ ;  $\delta_{\text{H}}$  (700 MHz,  $\text{CDCl}_3$ ) 8.51 – 8.48 (2H, m, 2'-**H**, 6'-**H**), 7.65 (1H, dt,  $J = 8.0, 2.0$  Hz, 4'-**H**), 7.24 (1H, dd,  $J = 8.0, 5.0$  Hz, 5'-**H**), 6.63 – 6.54 (1H, m, **NH**), 3.51 (2H, s, 2-**H**<sub>2</sub>), 3.40 (1H, ddd,  $J = 13.5, 6.0, 4.0$  Hz, **NHCHH'**), 3.29 – 3.22 (1H, m, 2''-**H**), 3.03 (1H, ddd,  $J = 13.5, 8.0, 5.0$  Hz, **NHCHH'**), 3.06 – 2.95 (1H, m, 1''-**H**), 2.89 (1H, ddd,  $J = 10.5, 7.5, 6.0$  Hz, 5''-**HH'**), 2.84 (1H, dt,  $J = 10.5, 7.0$  Hz, 5''-**HH'**), 1.84 (1H, dtd,  $J = 13.0, 8.0, 5.5$  Hz, 3''-**HH'**), 1.77 – 1.70 (1H, m, 4''-**HH'**), 1.70 – 1.62 (1H, m, 4''-**HH'**), 1.33 (1H, ddt,  $J = 13.0, 8.5, 7.0$  Hz, 3''-**HH'**);  $\delta_{\text{C}}$  (176 MHz,  $\text{CDCl}_3$ ) 170.1 (**C=O**), 150.4 (**C-2'**), 148.6 (**C-6'**), 136.9 (**C-4'**), 131.1 (**C-3'**), 123.7 (**C-5'**), 57.7 (**C-2''**), 46.5 (**C-5''**), 43.7 (**NHCHH'**), 40.8 (**C-2**), 29.2 (**C-3''**), 25.9 (**C-4''**);  $m/z$  (LCMS,  $\text{ESI}^+$ ) 220 ( $\text{MH}^+$ ); Accurate mass: Found  $\text{MH}^+$ , 220.1453;  $\text{C}_{12}\text{H}_{18}\text{N}_3\text{O}$  requires  $M$ , 220.1450.

*N*-([Pyrrolidin-2''-yl]methyl)-2-methyl-2-(pyrazol-1'-yl)propionamide **S51**

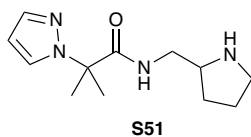

Obtained in 45% yield as a yellow oil.  $\nu_{\max}$  (ATR) 3326 (br), 2938 (w), 2868 (w), 1655 (s), 1516 (br, s), 1394 (s), 1316 (w), 1250 (w), 1200 (w), 1156 (w), 1088 (w), 1058 (w)  $\text{cm}^{-1}$ ;  $\delta_{\text{H}}$  (700 MHz,  $\text{CDCl}_3$ ) 7.63 (1H, d,  $J = 2.0$  Hz, **ArH**), 7.60 (1H, d,  $J = 2.0$  Hz, **ArH**), 6.46 – 6.41 (1H, m, **NH**), 6.32 (1H, t,  $J = 2.0$  Hz, 4'-**H**), 3.23 (1H, ddd,  $J = 13.0, 6.0, 4.5$  Hz, **NHCHH'**), 3.15 (1H, qd,  $J = 7.0, 4.5$  Hz, 2''-**H**), 3.01 (1H, ddd,  $J = 13.0, 7.0, 5.5$  Hz, **NHCHH'**), 2.85 – 2.78 (2H, m, 5''-**H**<sub>2</sub>), 1.85 (3H, s, 2-(**CH**<sub>3</sub>)(**CH**<sub>3</sub>)), 1.84 (3H, s, 2-(**CH**<sub>3</sub>)(**CH**<sub>3</sub>)), 1.74 (1H, dddd,  $J = 12.5, 8.5, 7.5, 5.5$  Hz, 3''-**HH'**), 1.70 – 1.58 (2H, m, 4''-**H**<sub>2</sub>), 1.23 (1H, ddt,  $J = 12.5, 8.5, 7.0$  Hz, 3''-**HH'**);  $\delta_{\text{C}}$  (176 MHz,  $\text{CDCl}_3$ ) 173.4 (**C=O**), 140.4 (**ArC**), 128.0 (**ArC**), 106.2 (**C-4'**), 65.2 (**C-2**), 57.3 (**C-2''**), 46.6 (**C-5''**), 44.3 (**NHCHH'**), 29.0 (**C-3''**), 26.1 (2-(**CH**<sub>3</sub>)(**CH**<sub>3</sub>)), 26.02 (2-(**CH**<sub>3</sub>)(**CH**<sub>3</sub>)), 25.80 (**C-4''**);  $m/z$  (LCMS,  $\text{ESI}^+$ ) 237 ( $\text{MH}^+$ ); Accurate mass: Found  $\text{MH}^+$ , 237.1723;  $\text{C}_{12}\text{H}_{21}\text{N}_4\text{O}$  requires  $M$ , 237.1715.

*N*-([Pyrrolidin-2''-yl]methyl)-2-(morpholin-4'-yl)acetamide **S52**

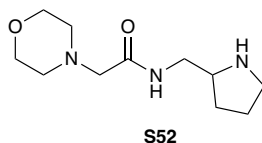

Obtained in 56% yield as an orange oil.  $\nu_{\max}$  (ATR) 3340 (br), 2954 (w), 2864 (w), 2812 (w), 1654 (s), 1523 (s), 1404 (m), 1290 (w), 1114 (s), 1014 (w)  $\text{cm}^{-1}$ ;  $\delta_{\text{H}}$  (700 MHz,  $\text{CDCl}_3$ ) 7.47 – 7.39 (1H, m, **NH**), 3.75 – 3.67 (4H, m, 2'-(**H<sub>2</sub>**)<sub>2</sub>), 3.40 – 3.33 (1H, m, **NHCHH'**), 3.29 – 3.23 (1H, m, 2''-**H**), 3.13 – 3.07 (1H, m, **NHCHH'**), 3.02 – 2.97 (2H, m, 2-**H<sub>2</sub>**), 2.93 – 2.87 (2H, m, 5''-**H<sub>2</sub>**), 2.56 – 2.47 (4H, m, 3'-(**H<sub>2</sub>**)<sub>2</sub>), 1.88 – 1.81 (1H, m, 3''-**HH'**), 1.78 – 1.72 (1H, m, 4''-**HH'**), 1.71 – 1.64 (1H, m, 4''-**HH'**), 1.38 – 1.31 (1H, m, 3''-**HH'**);  $\delta_{\text{C}}$  (176 MHz,  $\text{CDCl}_3$ ) 170.07 (**C=O**), 67.1 (**C-2'**), 62.2 (**C-2**), 57.9 (**C-2''**), 54.0 (**C-3'**), 46.8 (**C-5''**), 43.7 (**NHCHH'**), 29.3 (**C-3''**), 26.0 (**C-4''**);  $m/z$  (LCMS,  $\text{ESI}^+$ ) 228 ( $\text{MH}^+$ ); Accurate mass: Found  $\text{MH}^+$ , 228.1706:  $\text{C}_{11}\text{H}_{22}\text{N}_3\text{O}_2$  requires  $M$ , 228.1712.

*N*-([Pyrrolidin-2'-yl]methyl)1-methylbenzimidazole-2-carboxamide **S53**

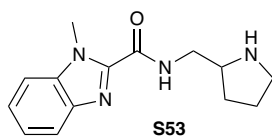

Obtained in 36% yield as an orange oil.  $\nu_{\max}$  (ATR) 3326 (br), 2954 (w), 2886 (w), 1665 (s), 1536 (s), 1463 (s), 1395 (m), 1332 (m), 1264 (m), 1006 (w)  $\text{cm}^{-1}$ ;  $\delta_{\text{H}}$  (700 MHz,  $\text{CDCl}_3$ ) 8.08 – 8.02 (1H, m, **NH**), 7.77 (1H, dt,  $J = 8.0, 1.0$  Hz, 4-**H**), 7.43 (1H, dt,  $J = 8.0, 1.0$  Hz, 7-**H**), 7.38 (1H, ddd,  $J = 8.0, 7.0, 1.0$  Hz, 6-**H**), 7.33 (1H, ddd,  $J = 8.0, 7.0, 1.0$  Hz, 5-**H**), 4.23 (3H, s, **NCH<sub>3</sub>**), 3.56 (1H, ddd,  $J = 13.5, 6.5, 5.0$  Hz, **NHCHH'**), 3.42 – 3.37 (1H, m, 2'-**H**), 3.31 (1H, ddd,  $J = 13.0, 7.5, 5.5$  Hz, **NHCHH'**), 3.01 – 2.92 (2H, m, 5'-**H<sub>2</sub>**), 1.93 (1H, dddd,  $J = 12.5, 9.0, 7.5, 5.5$  Hz, 3'-**HH'**), 1.88 – 1.79 (1H, m, 4'-**HH'**), 1.76 – 1.69 (1H, m, 4'-**HH'**), 1.48 (1H, ddt,  $J = 13.0, 9.0, 6.5$  Hz, 3'-**HH'**);  $\delta_{\text{C}}$  (176 MHz,  $\text{CDCl}_3$ ) 160.1 (**C=O**), 143.8 (**C-2**), 141.2 (**C-8**), 137.2 (**C-9**), 124.6 (**C-6**), 123.5 (**C-5**), 120.8 (**C-4**), 110.5 (**C-7**), 57.9 (**C-2'**), 46.7 (**C-5'**), 44.1 (**NHCHH'**), 32.2 (**NCH<sub>3</sub>**), 29.5 (**C-3'**), 25.9 (**C-4'**);  $m/z$  (LCMS,  $\text{ESI}^+$ ) 259 ( $\text{MH}^+$ ); Accurate mass: Found  $\text{MH}^+$ , 259.1565:  $\text{C}_{14}\text{H}_{19}\text{N}_4\text{O}$  requires  $M$ , 259.1559.

*N*-([Pyrrolidin-2'-yl]methyl)-2-(benzyloxy)benzamide **S54**

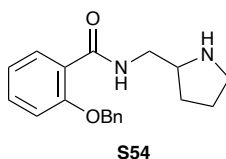

Obtained in 53% yield as an off-white solid. m.p. 83 – 85 °C;  $\nu_{\max}$  (ATR) 3396 (br), 3058 (w), 2942 (w), 2864 (w), 1643 (s), 1598 (m), 1534 (m), 1482 (m), 1450 (m), 1290 (m), 1230 (m), 1166 (w), 1105 (w), 1006 (w)  $\text{cm}^{-1}$ ;  $\delta_{\text{H}}$  (600 MHz,  $\text{CDCl}_3$ ) 8.21 (1H, dd,  $J = 8.0, 2.0$  Hz, 6-**H**), 8.12 – 8.06 (1H, m, **NH**), 7.50 – 7.46 (2H, m, 2<sup>Ph</sup>-**H**<sub>2</sub>), 7.45 – 7.35 (4H, m, 4-**H**, 3<sup>Ph</sup>-**H**<sub>2</sub>, 4<sup>Ph</sup>-**H**), 7.09 (1H, td,  $J = 8.0, 1.0$  Hz, 5-**H**), 7.05 (1H, dd,  $J = 8.5, 1.0$  Hz, 3-**H**), 5.17 (2H, s, **OCH**<sub>2</sub>), 3.48 (1H, ddd,  $J = 13.0, 6.0, 4.5$  Hz, **NHCHH'**), 3.19 (1H, ddd,  $J = 13.0, 7.5, 5.0$  Hz, **NHCHH'**), 3.13 (1H, tdd,  $J = 7.5, 7.0, 4.5$  Hz, 2'-**H**), 2.81 – 2.72 (2H, m, 5'-**H**<sub>2</sub>), 1.75 – 1.65 (2H, m, 4'-**HH'**, 3'-**HH'**), 1.64 – 1.56 (1H, m, 4'-**HH'**), 1.30 – 1.22 (1H, m, 3'-**HH'**);  $\delta_{\text{C}}$  (151 MHz,  $\text{CDCl}_3$ ) 165.6 (**C=O**), 157.0 (**C-2**), 135.8 (**C-1<sup>Ph</sup>**), 132.7 (**C-4**), 132.5 (**C-6**), 129.0 (**C-3<sup>Ph</sup>**), 128.9 (**C-4<sup>Ph</sup>**), 128.5 (**C-2<sup>Ph</sup>**), 122.2 (**C-1**), 121.7 (**C-5**), 112.6 (**C-3**), 71.5 (**OCH**<sub>2</sub>), 57.8 (**C-2'**), 46.6 (**C-5'**), 44.8 (**NHCH**<sub>2</sub>), 29.3 (**C-3'**), 25.8 (**C-4'**);  $m/z$  (LCMS,  $\text{ESI}^+$ ) 311 ( $\text{MH}^+$ ); Accurate mass: Found  $\text{MH}^+$ , 311.1757;  $\text{C}_{19}\text{H}_{23}\text{N}_2\text{O}_2$  requires  $M$ , 311.1760.

*N*-([Pyrrolidin-2'-yl]methyl)-3-(1'-methylpyrazol-5'-yl)benzamide **S56**

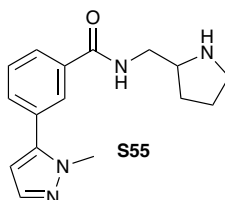

Obtained in 60% yield as an orange oil.  $\nu_{\max}$  (ATR) 3278 (br), 2942 (w), 2876 (w), 1641 (s), 1537 (s), 1476 (w), 1404 (w), 1296 (w), 1188 (w), 1104 (w)  $\text{cm}^{-1}$ ;  $\delta_{\text{H}}$  (700 MHz,  $\text{CDCl}_3$ ) 7.88 (1H, td,  $J = 1.5, 0.5$  Hz, 2-**H**), 7.80 (1H, dt,  $J = 7.5, 1.5$  Hz, 6-**H**), 7.52 (1H, dt,  $J = 7.5, 1.5$  Hz, 4-**H**), 7.52 (1H, d,  $J = 2.0$  Hz, 3'-**H**), 7.49 (1H, td,  $J = 7.5, 0.5$  Hz, 5-**H**), 7.14 – 7.07 (1H, m, **NH**), 6.34 (1H, d,  $J = 2.0$  Hz, 4'-**H**), 3.89 (3H, s, **NCH**<sub>3</sub>), 3.63 (1H, ddd,  $J = 13.5, 6.0, 4.0$  Hz, **NHCHH'**), 3.43 (1H, dddd,  $J = 8.0, 7.5, 7.0, 4.0$  Hz, 2''-**H**), 3.23 (1H, ddd,  $J = 13.5, 8.0, 5.0$  Hz, **NHCHH'**), 2.96 (1H, ddd,  $J = 11.0, 8.0, 6.0$  Hz, 5''-**HH'**), 2.92 (1H, dt,  $J = 11.0, 7.0$  Hz, 5''-**HH'**), 1.94 (1H, dddd,  $J = 13.0, 9.0, 7.5, 5.5$  Hz, 3''-**HH'**), 1.86 – 1.79 (1H, m, 4''-**HH'**), 1.77 – 1.70 (1H, m, 4''-**HH'**), 1.47 (1H, ddt,  $J = 13.0, 8.5, 7.0$  Hz, 3''-**HH'**);  $\delta_{\text{C}}$  (176 MHz,  $\text{CDCl}_3$ ) 167.0 (**C=O**), 142.8 (**C-5'**), 138.8 (**C-3'**), 135.4 (**C-1**), 131.6 (**C-4**), 131.4 (**C-3**), 129.0 (**C-5**), 127.7 (**C-2**), 126.9 (**C-6**), 106.5 (**C-4'**), 57.8 (**C-2''**), 46.6 (**C-5''**), 44.0 (**NHCHH'**), 37.7 (**NCH**<sub>3</sub>), 29.3 (**C-3''**), 26.1 (**C-4''**);  $m/z$  (LCMS,  $\text{ESI}^+$ ) 285 ( $\text{MH}^+$ ); Accurate mass: Found  $\text{MH}^+$ , 285.1712;  $\text{C}_{16}\text{H}_{21}\text{N}_4\text{O}$  requires  $M$ , 285.1715.

*N*-([Pyrrolidin-2'-yl]methyl)cyclohexanecarboxamide **S56**

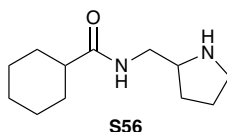

Obtained in 52% yield as a yellow oil pale yellow solid. m.p. 107 – 110 °C;  $\nu_{\max}$  (ATR) 3282 (br), 2927 (s), 2860 (m), 1637 (s), 1542 (s), 1456 (m), 1404 (m), 1256 (w)  $\text{cm}^{-1}$ ;  $\delta_{\text{H}}$  (700 MHz,  $\text{CDCl}_3$ ) 6.12 – 6.03 (1H, m, NH), 3.40 – 3.34 (1H, m, NHCHH'), 3.24 (1H, dtd,  $J = 8.0, 7.0, 4.5$  Hz, 2'-H), 3.02 (1H, ddd,  $J = 13.0, 8.0, 5.0$  Hz, NHCHH'), 2.93 – 2.86 (2H, m, 5'-H<sub>2</sub>), 2.06 (1H, tt,  $J = 12.0, 3.5$  Hz, 1<sup>Cy</sup>-H), 1.88 – 1.79 (3H, m, 2<sup>Cy</sup>-H<sub>2</sub>H'<sub>2</sub>, 3'-HH'), 1.79 – 1.71 (3H, m, 3<sup>Cy</sup>-H<sub>2</sub>H'<sub>2</sub>, 4'-HH'), 1.71 – 1.62 (2H, m, 4<sup>Cy</sup>-HH', 4'-HH'), 1.41 (2H, tdd,  $J = 12.5, 12.0, 3.0$  Hz, 2<sup>Cy</sup>-H<sub>2</sub>H'<sub>2</sub>), 1.35 (1H, ddt,  $J = 13.0, 8.5, 7.0$  Hz, 3'-HH'), 1.29 – 1.15 (3H, m, 3<sup>Cy</sup>-H<sub>2</sub>H'<sub>2</sub>, 4<sup>Cy</sup>-HH');  $\delta_{\text{C}}$  (176 MHz,  $\text{CDCl}_3$ , mixture of rotamers) 176.4 (C=O), 57.9 (C-2'), 46.7 (C-5'), 45.7 (C-1<sup>Cy</sup>), 43.5 (NHCHH'), 29.9(0) (C-2<sup>Cy</sup>), 29.8(5) (C-2<sup>Cy</sup>), 29.2 (C-3'), 26.0 (C-4'), 25.9(1) (C-4<sup>Cy</sup>), 25.9(0) (C-3<sup>Cy</sup>);  $m/z$  (LCMS, ESI<sup>+</sup>) 211 (MH<sup>+</sup>); Accurate mass: Found MH<sup>+</sup>, 211.1808: C<sub>12</sub>H<sub>23</sub>N<sub>2</sub>O requires  $M$ , 211.1810. All data agrees with commercial sample.

*N*-([Pyrrolidin-2'-yl]methyl)-2-methylpropionamide **S57**

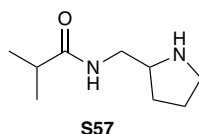

Obtained in 59% yield as a yellow oil.  $\nu_{\max}$  (ATR) 3300 (br), 3058 (w), 2958 (w), 2928 (w), 2872 (w), 1649 (s), 1542 (br, s), 1460 (w), 1394 (s), 1244 (w), 1170 (w), 1110 (w)  $\text{cm}^{-1}$ ;  $\delta_{\text{H}}$  (600 MHz,  $\text{CDCl}_3$ ) 6.08 – 5.98 (1H, m, NH), 3.38 (1H, ddd,  $J = 13.0, 6.0, 4.5$  Hz, NHCHH'), 3.29 – 3.21 (1H, m, 2'-H), 3.02 (1H, ddd,  $J = 13.0, 8.0, 5.0$  Hz, NHCHH'), 2.94 – 2.85 (2H, m, 5'-H<sub>2</sub>), 2.35 (1H, hept,  $J = 7.0$  Hz, 2-H), 1.89 – 1.80 (1H, m, 3'-HH'), 1.80 – 1.72 (1H, m, 4'-HH'), 1.72 – 1.64 (1H, m, 4'-HH'), 1.41 – 1.31 (1H, m, 3'-HH'), 1.14 (6H, d,  $J = 7.0$  Hz, 2-(CH<sub>3</sub>)(CH<sub>3</sub>));  $\delta_{\text{C}}$  (151 MHz,  $\text{CDCl}_3$ ) 177.2 (C=O), 57.9 (C-2'), 46.7 (C-5'), 43.6 (NHCHH'), 35.8 (C-2), 29.2 (C-3'), 26.1 (C-4'), 19.8(4) (2-(CH<sub>3</sub>)(CH<sub>3</sub>)), 19.7(9) (2-(CH<sub>3</sub>)(CH<sub>3</sub>));  $m/z$  (LCMS, ESI<sup>+</sup>) 171 (MH<sup>+</sup>); Accurate mass: Found MH<sup>+</sup>, 171.1501: C<sub>9</sub>H<sub>19</sub>N<sub>2</sub>O requires  $M$ , 171.1497. All data agrees with commercial sample.

*N*-([Pyrrolidin-2-yl]methyl)benzamide **S58**

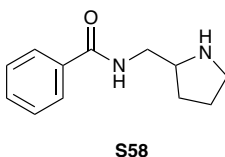

Obtained in 17% yield as a yellow oil.  $\nu_{\max}$  (ATR) 3296 (br), 3054 (w), 2928 (w), 2872 (w), 1636 (s), 1538 (s), 1486 (m), 1404 (m), 1356 (m), 1300 (w)  $\text{cm}^{-1}$ ;  $\delta_{\text{H}}$  (700 MHz,  $\text{CDCl}_3$ ) 7.82 – 7.79 (2H, m, 2<sup>Ph</sup>-H<sub>2</sub>), 7.50 –



7.45 (1H, m, 4<sup>Ph</sup>-H), 7.44–7.39 (2H, m, 3<sup>Ph</sup>-H<sub>2</sub>), 7.00–6.94 (1H, m, NH), 3.61 (1H, ddd, *J* = 13.5, 6.0, 4.0 Hz, NHCHH'), 3.41 (1H, dddd, *J* = 8.0, 7.5, 7.0, 4.0 Hz, 2-H), 3.23 (1H, ddd, *J* = 13.5, 8.0, 5.0 Hz, NHCHH'), 2.96–2.89 (2H, m, 5-H<sub>2</sub>), 1.91 (1H, dddd, *J* = 13.0, 9.0, 7.5, 5.5 Hz, 3-HH'), 1.84–1.78 (1H, m, 4-HH'), 1.75–1.68 (1H, m, 4-HH'), 1.46 (1H, ddt, *J* = 13.0, 8.5, 7.0 Hz, 3-HH'); δ<sub>c</sub> (176 MHz, CDCl<sub>3</sub>) 167.7 (C=O), 134.8 (C-1<sup>Ph</sup>), 131.5 (C-4<sup>Ph</sup>), 128.6 (C-3<sup>Ph</sup>), 127.1 (C-2<sup>Ph</sup>), 57.9 (C-2), 46.6 (C-5), 44.0 (NHCHH'), 29.3 (C-3), 26.1 (C-4); *m/z* (LCMS, ESI<sup>+</sup>) 205 (MH<sup>+</sup>); Accurate mass: Found MH<sup>+</sup>, 205.1347; C<sub>12</sub>H<sub>17</sub>N<sub>2</sub>O requires *M*, 205.1341. All data agrees with commercial sample.

**(2R)-2-{2-[(4-chlorophenyl)(phenyl)methoxy]ethyl}-1-methylpyrrolidine 10 (General procedure C)**

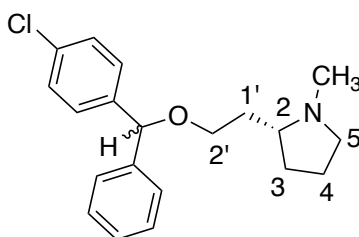

To a solution of (2R) benzyl 2-(2'-hydroxyethyl)pyrrolidine-1-carboxylate (**R**)-**6d** (1 equiv.) and diarylcarbinol **5a** (1 equiv.) in DCE (0.2M) was added AuCl (0.1 equiv.). The reaction mixture was heated at 80 °C for 48 h. The solvent was then removed under reduced pressure to afford the crude product which was purified by chromatography. This was then dissolved in THF (0.1 M) and LiAlH<sub>4</sub> (2.4 M solution in THF, 2.5 equiv.) slowly added. After stirring at rt, rt for 4 h, the reaction mixture was cooled in an ice bath and any reactive salts were quenched according to Fieser's method. The crude product was purified by reversed phase column chromatography (5 → 100% MeCN in H<sub>2</sub>O) to afford the title amine in 59% yield as a yellow oil identical in all respect to that described above.

**(2R)-2-[2-(diphenylmethoxy)ethyl]-1-methylpyrrolidine 28**

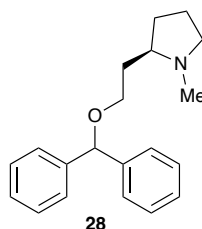

To a 0 °C solution of Benzyl (2R)-2-[2'-[(4''-bromophenyl)(phenyl)methoxy]ethyl]pyrrolidine-1-carboxylate (256 mg, 0.52 mmol) in THF (6 mL) was slowly added LiAlH<sub>4</sub> (2.4M solution in THF, 0.54 mL, 1.30 mmol), before being heated under reflux for 16h. The reaction mixture was then cooled in an ice bath and any reactive salts were quenched according to Fieser's method. The crude product was purified by reversed

phase column chromatography (5% → 100% MeCN in H<sub>2</sub>O with 0.1% formic acid) to afford title compound (102 mg, 52%) as a yellow oil.  $\nu_{\max}$  (ATR) 3028 (w), 2944 (w), 2869 (w), 2778 (w), 1697 (w), 1590 (w), 1485 (m), 1453 (m), 1346 (w), 1184 (w), 1091 (s), 1071 (s), 1010 (s) cm<sup>-1</sup>;  $\delta_{\text{H}}$  (600 MHz, CDCl<sub>3</sub>) 7.34 - 7.29 (8H, m, ArH), 7.27 - 7.23 (2H, m, ArH), 5.32 (1H, m, Ar<sub>2</sub>CH), 3.69 - 3.60 (2H, m, 2'-HH', 5-HH'), 3.53 - 3.46 (1H, m, 2'-HH'), 3.13 - 2.93 (1H, m, 2-H), 2.68 - 2.62 (4H, m, 5-HH', NCH<sub>3</sub>), 2.36 - 2.24 (1H, m, 1'-HH'), 2.18 - 1.99 (3H, m, 1'-HH', 3-HH', 4-HH'), 1.96 - 1.76 (2H, m, 3-HH', 4-HH');  $\delta_{\text{C}}$  (151 MHz, CDCl<sub>3</sub>) 142.1 (C-1<sup>Ph</sup>/1'<sup>Ph</sup>), 142.0 (C-1<sup>Ph</sup>/1'<sup>Ph</sup>), 128.6 (C-4<sup>Ph</sup>/4'<sup>Ph</sup>), 127.8 (C-3<sup>Ph</sup>/3'<sup>Ph</sup>), 127.7 (C-3<sup>Ph</sup>/3'<sup>Ph</sup>), 127.0(3) (C-2<sup>Ph</sup>/2'<sup>Ph</sup>), 127.9(5) (C-2<sup>Ph</sup>/2'<sup>Ph</sup>), 84.1 (Ar<sub>2</sub>CH), 66.3 (C-2), 65.9 (C-2'), 56.4 (C-5), 39.6 (NCH<sub>3</sub>), 31.4 (C-1'), 30.1 (C-3), 21.8 (C-4);  $m/z$  (LC-MS, ESI<sup>+</sup>) 296 (MH<sup>+</sup>).

**2-(2'-[4'''-Bromophenyl]{phenyl}methoxy)ethyl)-1-methylpyrrolidine 29**

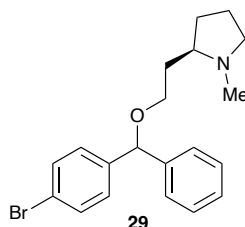

Following the same procedure as described for **7**, diarylcarbinol **5c** (226 mg, 0.86 mmol) and N-methyl homoprolinol (**S**)-**6b** (101 mg, 0.78 mmol) were combined to afford, following reverse-phase column chromatography (5% → 100% MeCN in H<sub>2</sub>O with 0.1% formic acid), the *title compound* (89 mg, 30%) as a colourless oil.  $R_f$  0.29 (10% MeOH in CHCl<sub>3</sub> with 1% NEt<sub>3</sub>);  $\nu_{\max}$  (ATR) 3033 (w), 3945 (w), 2870 (w), 2775 (w), 1486 (m), 1453 (m), 1366 (s), 1218 (s), 1092 (s), 1010 (s) cm<sup>-1</sup>;  $\delta_{\text{H}}$  (700 MHz, CDCl<sub>3</sub>, mixture of diastereomers) 7.43 (2H, dd,  $J = 8.5, 2.5$  Hz, 3'''-H<sub>2</sub>), 7.35 - 7.28 (4H, m, 2<sup>Ph</sup>-H<sub>2</sub>, 3<sup>Ph</sup>-H<sub>2</sub>), 7.26 - 7.23 (1H, m, 4<sup>Ph</sup>-H), 7.21 (2H, dd,  $J = 8.5, 2.5$  Hz, 2'''-H<sub>2</sub>), 5.27 (1H, s, 1''-H), 3.55 - 3.49 (1H, m, 2'-HH'), 3.49 - 3.44 (1H, m, 2'-HH'), 3.14 (1H, apparent t,  $J = 9.0$  Hz, 5-HH'), 2.36 (3H, app d,  $J = 5.0$ , NCH<sub>3</sub> isomer 1, NCH<sub>3</sub> isomer 2), 2.32 - 2.25 (1H, m, 2-H), 2.20 (1H, apparent q,  $J = 9.0$  Hz, 5-HH'), 2.14 - 2.07 (1H, m, 1'-HH'), 1.97 - 1.88 (1H, m, 3-HH'), 1.84 - 1.74 (1H, m, 4-HH'), 1.74 - 1.66 (1H, m, 4-HH'), 1.65 - 1.57 (1H, m, 1'-HH'), 1.55 - 1.46 (1H, m, 3-HH');  $\delta_{\text{C}}$  (176 MHz, CDCl<sub>3</sub>, mixture of diastereomers) 142.0(0) (C-1<sup>Ph</sup> isomer 1), 141.9(6) (C-1<sup>Ph</sup> isomer 2), 141.7(2) (C-1''' isomer 1), 141.7(0) (C-1''' isomer 2), 131.6(0) (C-3''' isomer 1), 131.5(9) (C-3''' isomer 2), 128.7(2) (C-2''' isomer 1), 128.6(8) (C-2''' isomer 2), 128.6 (C-3<sup>Ph</sup>), 127.8(0) (C-4<sup>Ph</sup> isomer 1), 127.7(7) (C-4<sup>Ph</sup> isomer 2), 127.0(3) (C-2<sup>Ph</sup> isomer 1), 126.9(7) (C-2<sup>Ph</sup> isomer 2), 121.4(1) (C-4''' isomer 1), 121.3(8) (C-4''' isomer 2), 83.3(0) (C-1'' isomer 1), 83.2(7) (C-1'' isomer 2), 67.1(3) (C-2' isomer 1), 67.0(9) (C-2' isomer 2), 64.2 (C-2), 57.1 (C-5), 40.5 (NCH<sub>3</sub>), 33.8 (C-1'), 31.0 (C-3 isomer 1), 30.9 (C-3 isomer 2), 22.0(4) (C-4 isomer 1), 22.0(3) (C-4 isomer 2);  $m/z$  (LCMS, ESI<sup>+</sup>) 374 (M(<sup>79</sup>Br)H<sup>+</sup>), 376 (M(<sup>81</sup>Br)H<sup>+</sup>); Accurate mass: Found MH<sup>+</sup>, 374.1134: C<sub>20</sub>H<sub>25</sub>NO<sup>79</sup>Br requires  $M$ , 374.1120.

(2R)-2-{2-[(4-Methoxyphenyl)(phenyl)methoxy]ethyl}-1-methylpyrrolidine **30**

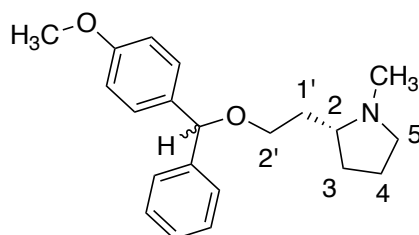

Obtained following general procedure C in 20% overall yield as a colourless oil.  $\nu_{\max}$  (ATR) 2961 (w), 1611(w), 1510 (m), 1453 (w), 1247 (m), 1172 (w), 1090 (m), 1031 (m)  $\text{cm}^{-1}$ .  $\delta_{\text{H}}$  (700 MHz,  $\text{CDCl}_3$ ) 7.32 - 7.12 (7H, m, ArH), 6.83 - 6.77 (2H, m, ArH), 5.23 (1H, s, Ar<sub>2</sub>CH), 3.72 (3H, s, OCH<sub>3</sub>), 3.55 - 3.49 (1H, m, 2'-HH'), 3.48 - 3.38 (2H, m, 2'-HH', 5-HH'), 2.77 - 2.69 (1H, m, 2-H), 2.50 (3H, s, NCH<sub>3</sub>), 2.47 - 2.40 (1H, m, 5-HH'), 2.21 - 2.12 (1H, m, 1'-HH'), 2.05 - 1.96 (1H, m, 3-HH'), 1.95 - 1.85 (1H, m, 4-HH'), 1.82 - 1.71 (2H, m, 1'-HH', 4-HH'), 1.68 - 1.59 (1H, m, 3-HH').  $\delta_{\text{C}}$  (176 MHz,  $\text{CDCl}_3$ , mixture of diastereomers) 159.0(4) (ArC), 159.0(1) (ArC), 142.5 (ArC), 142.4 (ArC), 134.3(4) (ArC), 134.2(9) (ArC), 128.4 (ArC), 128.3 (ArC), 128.2 (ArC), 127.4(4) (ArC), 127.3(9) (ArC), 126.8 (ArC), 126.7 (ArC), 113.8 (ArC), 83.5 (Ar<sub>2</sub>C), 83.4 (Ar<sub>2</sub>C), 66.1(0) (C-2'), 66.0(6) (C-2'), 65.0 (C-2), 56.0 (C-5), 55.3 (OCH<sub>3</sub>), 39.5 (NCH<sub>3</sub>), 31.8(4) (C-1'), 31.8(1) (C-1'), 30.2(3) (C-3), 30.2(0) (C-3), 21.7 (C-4).  $m/z$  (LC-MS, ESI<sup>+</sup>) 326 (MH<sup>+</sup>). Accurate mass: Found MH<sup>+</sup>, 326.2129: C<sub>21</sub>H<sub>28</sub>NO<sub>2</sub> requires  $M$ , 326.2120.

(2R)-2-{2-[(3-methoxyphenyl)(phenyl)methoxy]ethyl}-1-methylpyrrolidine **31**

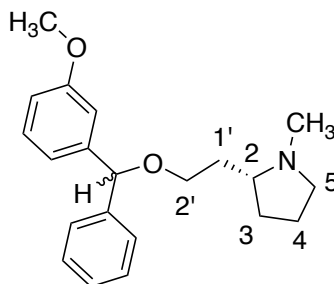

Obtained following general procedure C in 12% overall yield as a colourless oil.  $\nu_{\max}$  (ATR) 2946 (m), 1599 (m), 1488 (m), 1454 (m), 1265 (m), 1154 (w), 1095 (m), 1049 (m)  $\text{cm}^{-1}$ .  $\delta_{\text{H}}$  (700 MHz,  $\text{CDCl}_3$ ) 7.35 - 7.29 (4H, m, ArH), 7.25 - 7.21 (2H, m, ArH), 6.93 - 6.90 (2H, m, ArH), 6.80 - 6.76 (1H, m, ArH), 5.29 (1H, s, Ar<sub>2</sub>CH), 3.78 (3H, s, OCH<sub>3</sub>), 3.57 - 3.51 (1H, m, 2'-HH'), 3.51 - 3.45 (1H, m, 2'-HH'), 3.15 - 3.09 (1H, m, 5-HH'), 2.35 (3H, s, NCH<sub>3</sub>), 2.32 - 2.24 (1H, m, 2-H), 2.22 - 2.16 (1H, m, 5-HH'), 2.15 - 2.09 (1H, m, 1'-HH'), 1.98 - 1.90 (1H, m, 3-HH'), 1.84 - 1.75 (1H, m, 4-HH'), 1.73 - 1.65 (1H, m, 4-HH'), 1.64 - 1.56 (1H, m, 1'-HH'), 1.55 - 1.46 (1H, m, 3-HH').  $\delta_{\text{C}}$  (176 MHz,  $\text{CDCl}_3$ , mixture of diastereomers) 159.8 (ArC), 144.2(2) (ArC), 144.2(0) (ArC), 142.4(7) (ArC), 142.4(3) (ArC), 129.5 (ArC), 128.5 (ArC), 127.6 (ArC), 127.5 (ArC), 127.0(3) (ArC), 126.9(8) (ArC), 119.5(2) (ArC), 119.4(7) (ArC), 112.8(0) (ArC), 112.7(6) (ArC), 112.6(9) (ArC), 112.6(5) (ArC),

83.8 (Ar<sub>2</sub>CH), 67.1 (C-2'), 64.2 (C-2), 57.2 (C-5), 55.3 (OCH<sub>3</sub>), 40.5 (NCH<sub>3</sub>), 33.9 (C-1'), 31.0 (C-3), 22.0 (C-4).  
*m/z* (LC-MS, ESI<sup>+</sup>) 326 (MH<sup>+</sup>). Accurate mass: Found MH<sup>+</sup>, 326.2122: C<sub>21</sub>H<sub>28</sub>NO<sub>2</sub> requires *M*, 326.2120.

(2*R*)-2-{2-[(4-fluorophenyl)(phenyl)methoxy]ethyl}-1-methylpyrrolidine **32**

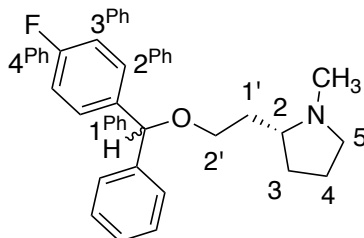

Obtained following general procedure C in 34% overall yield as a yellow oil.  $\nu_{\max}$  (ATR) 2942, 2870, 2777, 1604, 1508, 1454, 1348, 1294, 1221, 1184, 1156, 1090, 1029, 1016.  $\delta_{\text{H}}$  (700 MHz, CDCl<sub>3</sub>, mixture of diastereomers) 7.35 – 7.23 (7H, m, ArH), 7.02 – 6.97 (2H, m, 3<sup>Ph</sup>-H<sub>2</sub>), 5.31 (1H, s, Ar<sub>2</sub>CH), 3.55 – 3.49 (1H, m, 2'-HH'), 3.49 – 3.43 (1H, m, 2'-HH'), 3.14 – 3.08 (1H, m, 5-HH'), 2.34 (1.5H, s, NCH<sub>3</sub>), 2.34 (1.5H, s, NCH<sub>3</sub>), 2.29 – 2.21 (1H, m, 2-H), 2.21 – 2.15 (1H, m, 5-HH'), 2.14 – 2.06 (1H, m, 1'-HH'), 1.96 – 1.88 (1H, m, 3-HH'), 1.83 – 1.73 (1H, m, 4-HH'), 1.72 – 1.64 (1H, m, 4-HH'), 1.63 – 1.55 (1H, m, 1'-HH'), 1.53 – 1.44 (1H, m, 3-HH').  $\delta_{\text{C}}$  (176 MHz, CDCl<sub>3</sub>, mixture of diastereomers) 162.2(1) (C-4<sup>Ph</sup>, d, *J* = 245.3), 162.1(9) (C-4<sup>Ph</sup>, d, *J* = 245.3 Hz), 142.4 (ArC), 142.3 (ArC), 138.4(5) (C-1<sup>Ph</sup>, d, *J* = 3.0 Hz), 138.4(2) (C-1<sup>Ph</sup>, d, *J* = 3.0 Hz), 128.7(0) (ArC), 128.6(5) (ArC), 128.5(9) (ArC), 128.5(5) (ArC), 127.7 (ArC), 127.6 (ArC), 127.0 (C-2<sup>Ph</sup>, d, *J* = 9.0 Hz), 115.3(0) (C-3<sup>Ph</sup>, d, *J* = 21.4 Hz), 115.2(9) (C-3<sup>Ph</sup>, d, *J* = 21.4 Hz), 83.2 (Ar<sub>2</sub>CH), 66.1(0) (C-2'), 66.0(8) (C-2'), 64.1(2) (C-2), 64.1(1) (C-2), 57.2 (C-5), 40.5 (CH<sub>3</sub>), 33.9 (C-1'), 31.0 (C-3), 30.9 (C-3), 22.1 (C-4).  $\delta_{\text{F}}$  (376 MHz, CDCl<sub>3</sub>) -115.3(2) (s, 4-F, isomer 1), -115.3(8) (s, 4<sup>Ph</sup>-F, isomer 2). *m/z* (LC-MS, ESI<sup>+</sup>) 314 (MH<sup>+</sup>). Accurate mass: Found (MH<sup>+</sup>), 314.1909: C<sub>20</sub>H<sub>25</sub>NOF requires *M*, 314.1920.

(2*R*)-2-{2-[bis(4-fluorophenyl)methoxy]ethyl}-1-methylpyrrolidine **33**

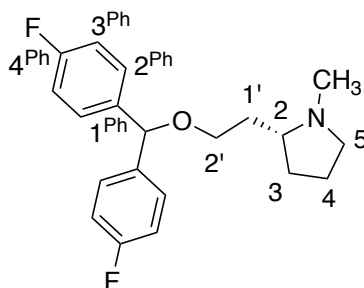

Obtained following general procedure C in 49% yield as a colourless oil.  $\nu_{\max}$  (ATR) 2946 (w), 2871 (w), 1603 (w), 1506 (s), 1220 (s), 1154 (w), 1086 (w).  $\delta_{\text{H}}$  (700 MHz, CDCl<sub>3</sub>) 7.28 - 7.24 (4H, m, 2<sup>Ph</sup>-H), 7.02 - 6.98 (4H, m, 3<sup>Ph</sup>-H), 5.28 (1H, s, Ar<sub>2</sub>CH), 3.53 - 3.49 (1H, m, 2'-HH'), 3.46 - 3.42 (1H, m, 2'-HH'), 3.21 - 3.15 (1H, m, 5-HH'), 2.38 (3H, s, CH<sub>3</sub>), 2.37 - 2.32 (1H, m, 2-H), 2.29 - 2.22 (1H, m, 5-HH'), 2.14 - 2.09 (1H, m, 1-HH'), 1.97 - 1.90 (1H, m, 4-HH'), 1.87 - 1.78 (1H, m, 3-HH'), 1.75 - 1.62 (2H, m, 3-HH', 1'-HH'), 1.58 - 1.49 (1H,

m, 4-*HH'*).  $\delta_c$  (176 MHz,  $CDCl_3$ ) 162.2(6) (**C-4<sup>Ph</sup>**, d,  $J = 245.5$  Hz), 162.2(4) (**C-4<sup>Ph</sup>**, d,  $J = 245.5$  Hz), 138.0(9) (**C-1<sup>Ph</sup>**, d,  $J = 3.0$ ), 138.0(6) (**C-1<sup>Ph</sup>**, d,  $J = 3.0$ ), 128.6(2) (**C-2<sup>Ph</sup>**, d,  $J = 8.0$  Hz), 128.5(6) (**C-2<sup>Ph</sup>**, d,  $J = 8.0$  Hz), 115.4(1) (**C-3<sup>Ph</sup>**, d,  $J = 21.5$ ), 115.3(9) (**C-3<sup>Ph</sup>**, d,  $J = 21.5$ ), 82.5 ( $Ar_2CH$ ), 66.9 (**C-2'**), 64.4 (**C-2**), 57.0 (**C-5**), 40.4 ( $CH_3$ ), 33.4 (**C-1'**), 30.8 (**C-4**), 22.0 (**C-3**).  $\delta_f$  (376 MHz,  $CDCl_3$ ) -115.01- -115.11 (m, 4<sup>Ph</sup>-**F**).  $m/z$  (LC-MS, ESI<sup>+</sup>) 332 ( $MH^+$ ). Accurate mass: Found ( $MH^+$ ), 332.1828:  $C_{20}H_{24}F_2NO$  requires  $M$ , 332.1826.

#### General procedure D: Alkylation of diarylcarbinols **5** using NaH

Diarylcarbinol **5** (1 equiv.) and NaH (60%, 3 equiv.) were dissolved in anhydrous toluene (0.2M) and heated under reflux for 3 h under nitrogen. The solution was cooled to rt and chloroethylpyrrolidine (1 equiv.) in toluene (0.4M) was added. The reaction mixture was then reacted under reflux overnight. The reaction mixture was cooled, quenched with  $H_2O$  and diluted with EtOAc. The aqueous layer was separated and extracted with EtOAc. The combined organic layers were then dried over  $Na_2SO_4$ , filtered, and then concentrated *in vacuo*. The crude product was purified by flash column chromatography (0  $\rightarrow$  100% EtOAc in hexanes with 1%  $NEt_3$ ) to afford the title compounds.

#### General procedure E: Alkylation of diarylcarbinols **5** using $KO^tBu$

Diarylcarbinol (**S**)-**5a** (1 equiv.) was dissolved in anhydrous DMF (0.3M) in an oven dried sealed tube and the solution was degassed with nitrogen. Then  $tBuOK$  (2.2 equiv.), chloroethylpyrrolidine (**R**)-**3** (1.2 equiv.) and tetra-*n*-butylammonium iodide (0.2 equiv.) were added to it and the mixture was degassed again and stirred at 50  $^{\circ}C$  overnight. The reaction mixture was cooled, quenched with  $H_2O$  and diluted with EtOAc. The aqueous layer was separated and extracted with EtOAc. The combined organic layers were then dried over  $Na_2SO_4$ , filtered, and then concentrated *in vacuo*. The crude product was purified by flash column chromatography (0  $\rightarrow$  100% EtOAc in hexanes with 1%  $NEt_3$ ) to afford the title compounds.

#### (2*R*)-2-{2'-[(*R*)-(4''-chlorophenyl)(phenyl)methoxy]ethyl}-1-methylpyrrolidine (**R, R**)-**35**

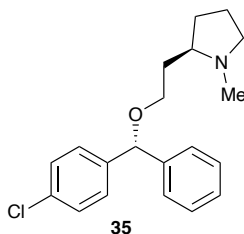

General procedure D was followed in the reaction of (*R*)-4-chlorophenyl(phenyl)methanol (**R**)-**5a** (120 mg, 0.43 mmol) and (2*R*)-2-(2-chloroethyl)-1-methylpyrrolidine (**R**)-**3** (63mg, 0.43 mmol). The crude product was purified by column chromatography (0  $\rightarrow$  100% EtOAc in hexanes with 1%  $NEt_3$ ) to afford title compound (**R, R**)-**35** as a colourless oil (53 mg, 38%) and by-product (**S, R**)-**36** (6 mg, 4%) as a colourless oil.  $R_f = 0.32$  (80% EtOAc in hexanes with 1%  $NEt_3$ ).  $\nu_{max}$  (ATR) 2943 (w), 2776 (w), 1489 (w), 1453 (w), 1088

(m), 1015 (m).  $\delta_{\text{H}}$  (700 MHz,  $\text{CDCl}_3$ ) 7.32 – 7.29 (4H, m,  $2^{\text{Ph}}\text{-H}$ ,  $3^{\text{Ph}}\text{-H}$ ), 7.29 – 7.22 (5H, m,  $2'^{\text{Ph}}\text{-H}$ ,  $3'^{\text{Ph}}\text{-H}$ ,  $4'^{\text{Ph}}\text{-H}$ ), 5.28 (1H, s,  $\text{Ar}_2\text{CH}$ ), 3.53 – 3.48 (1H, m,  $2'\text{-HH}'$ ), 3.47 – 3.42 (1H, m,  $2'\text{-HH}'$ ), 3.08 – 3.01 (1H, m,  $5\text{-HH}'$ ), 2.30 (3H, s,  $\text{CH}_3$ ), 2.19 – 2.04 (3H, m,  $1'\text{-HH}'$ ,  $2\text{-H}$ ,  $5\text{-HH}'$ ), 1.93 – 1.86 (1H, m,  $3\text{-HH}'$ ), 1.79 – 1.70 (1H, m,  $4\text{-HH}'$ ), 1.69 – 1.61 (1H, m,  $4\text{-HH}'$ ), 1.58 – 1.50 (1H, m,  $1'\text{-HH}'$ ), 1.49 – 1.40 (1H, m,  $3\text{-HH}'$ ).  $\delta_{\text{C}}$  (151 MHz,  $\text{CDCl}_3$ ) 142.1 (ArC), 141.2 (ArC), 133.2 (ArC), 128.6(0) (ArC), 128.5(6) (ArC), 128.4 (ArC), 127.7 (ArC), 127.0 (ArC), 83.2 ( $\text{Ar}_2\text{CH}$ ), 67.3 (C-2'), 63.9 (C-2), 57.3 (C-5), 40.6 ( $\text{CH}_3$ ), 34.1 (C-1'), 31.0 (C-3), 22.1 (C-4).  $m/z$  (LC-MS,  $\text{ESI}^+$ ) 330 ( $\text{M}^{(35\text{Cl})\text{H}^+}$ ), 332 ( $\text{M}^{(37\text{Cl})\text{H}^+}$ ). Accurate mass: Found ( $\text{MH}^+$ ), 330.1608:  $\text{C}_{20}\text{H}_{25}\text{NO}^{35}\text{Cl}$  requires  $M$ , 330.1625.

**(4S)-4-[(R)-(4'-Chlorophenyl)(phenyl)methoxy]-1-methylazepane 36**

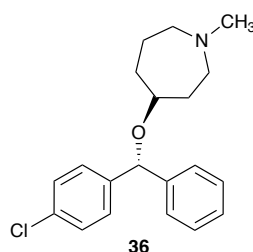

$R_f$  = 0.27 (80% EtOAc in hexanes with 1%  $\text{NEt}_3$ ).  $\nu_{\text{max}}$  (ATR) 2936 (w), 1489 (w).  $\delta_{\text{H}}$  (700 MHz,  $\text{CDCl}_3$ ) 7.32 – 7.22 (9H, m, ArH), 5.40 (1H, s,  $\text{Ar}_2\text{CH}$ ), 3.67 – 3.61 (1H, m,  $4\text{-H}$ ), 2.81 – 2.72 (1H, m,  $2\text{-HH}'$ ), 2.69 – 2.63 (1H, m,  $7\text{-HH}'$ ), 2.62 – 2.56 (1H, m,  $7\text{-HH}'$ ), 2.54 – 2.47 (1H, m,  $2\text{-HH}'$ ), 2.36 (3H, s,  $\text{CH}_3$ ), 2.07 – 2.00 (1H, m,  $3\text{-HH}'$ ), 1.98 – 1.89 (2H, m,  $3\text{-HH}'$ ,  $5\text{-HH}'$ ), 1.85 – 1.77 (2H, m,  $5\text{-HH}'$ ,  $6\text{-HH}'$ ), 1.60 – 1.52 (1H, m,  $6\text{-HH}'$ ).  $\delta_{\text{C}}$  (176 MHz,  $\text{CDCl}_3$ ) 142.5 (ArC), 141.6 (ArC), 133.2 (ArC), 128.6(3) (ArC), 128.5(8) (ArC), 128.5 (ArC), 127.7 (ArC), 127.1 (ArC), 79.9 ( $\text{Ar}_2\text{CH}$ ), 75.6 (C-4), 58.9 (C-7), 52.7 (C-2), 47.0 ( $\text{CH}_3$ ), 33.1 (C-3), 32.9 (C-5), 23.0 (C-6).  $m/z$  (LC-MS,  $\text{ESI}^+$ ) 330 ( $\text{M}^{(35\text{Cl})\text{H}^+}$ ), 332 ( $\text{M}^{(37\text{Cl})\text{H}^+}$ ). Accurate mass: Found ( $\text{MH}^+$ ), 330.1620:  $\text{C}_{20}\text{H}_{25}\text{NO}^{35}\text{Cl}$  requires  $M$ , 330.1625.

**(2R)-2-(2'-[(S)-(4''-Chlorophenyl)(phenyl)methoxy]ethyl)-1-methylpyrrolidine 37**

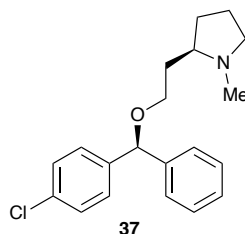

General procedure D was used in the reaction of (S)-4-chlorophenyl(phenyl)methanol (**S**-5a (105 mg, 0.38 mmol) and (2R)-2-(2-chloroethyl)-1-methylpyrrolidine (**R**-3 (58 mg, 0.39 mmol). The crude product was purified by column chromatography (0 → 100% EtOAc in hexanes with 1%  $\text{NEt}_3$ ) to afford the title compound as a colourless oil (27 mg, 22%).  $\nu_{\text{max}}$  (ATR) 2943 (w), 2870 (w), 2776 (w), 1490 (m), 1453 (w), 1088 (s), 1015 (m).  $\delta_{\text{H}}$  (700 MHz,  $\text{CDCl}_3$ ) 7.32 – 7.22 (9H, m, ArH), 5.28 (1H, s,  $\text{Ar}_2\text{CH}$ ), 3.51 – 3.42 (2H, m,

2'-H<sub>2</sub>), 3.05 - 3.01 (1H, m, 5-HH'), 2.29 (3H, s, CH<sub>3</sub>), 2.17 - 2.03 (3H, m, 1'-HH', 2-H, 5-HH'), 1.91 - 1.84 (1H, m, 3-HH'), 1.77 - 1.69 (1H, m, 4-HH'), 1.67 - 1.60 (1H, m, 4-HH'), 1.56 - 1.50 (1H, m, 1'-HH'), 1.46 - 1.40 (1H, m, 3-HH'). δ<sub>c</sub> (176 MHz, CDCl<sub>3</sub>) 142.1 (ArC), 141.3 (ArC), 133.2 (ArC), 128.6(2) (ArC), 128.5(9) (ArC), 128.3 (ArC), 127.7 (ArC), 127.0 (ArC), 83.2 (Ar<sub>2</sub>CH), 67.3 (C-2'), 63.9 (C-2), 57.3 (C-5), 40.6 (NCH<sub>3</sub>), 34.2 (C-1'), 31.1 (C-3), 22.1 (C-4). *m/z* (LC-MS, ESI<sup>+</sup>) 330 (M(<sup>35</sup>Cl)H<sup>+</sup>), 332 (M(<sup>37</sup>Cl)H<sup>+</sup>). Accurate mass: Found (MH<sup>+</sup>), 330.1643; C<sub>20</sub>H<sub>25</sub>NO<sup>35</sup>Cl requires *M*, 330.1625.

(2S) N-{2'-[(4''-Chlorophenyl)(phenyl)methoxy]ethyl}-2-methylpyrrolidine **38a**

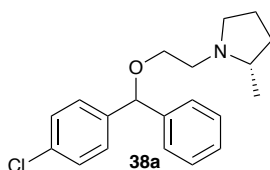

1-[(2-bromoethoxy)(phenyl)methyl]-4-chlorobenzene (310 mg, 0.95 mmol) in DMF (1 mL) was added dropwise to a suspension of the (*S*)-2-methyl-pyrrolidine hydrochloride (115 mg, 0.95 mmol), KI (17 mg, 0.10 mmol) and K<sub>2</sub>CO<sub>3</sub> (263 mg, 1.90 mmol) in DMF (1.5 mL). The reaction mixture was stirred at rt for 24 h. Following the addition of H<sub>2</sub>O (5 mL) and extraction with EtOAc (3 x 5 mL), the combined organic layers were dried and concentrated *in vacuo*. The crude product was purified by column chromatography (10% MeOH in CHCl<sub>3</sub>) to afford the title compound (195 mg, 62 %) as a brown oil. *v*<sub>max</sub> (ATR) 2962 (w), 2869 (w), 2785 (w), 1489 (m), 1453 (w), 1375 (w), 1293 (w), 1184 (w), 1087 (s), 1014 (m). δ<sub>H</sub> (700 MHz, CDCl<sub>3</sub>) 7.32 - 7.22 (9H, m, ArH), 5.36 (1H, s, Ar<sub>2</sub>CH), 3.65 - 3.55 (2H, m, 2'-H<sub>2</sub>), 3.20 - 3.13 (1H, m, 5-HH'), 3.10 - 3.04 (1H, m, 1'-HH'), 2.47 - 2.35 (2H, m, 5-HH', 2-H), 2.28 - 2.20 (1H, m, 1'-HH'), 1.94 - 1.85 (1H, m, 3-HH'), 1.81 - 1.72 (1H, m, 4-HH'), 1.71 - 1.63 (1H, m, 4-HH'), 1.46 - 1.36 (1H, m, 3-HH'), 1.10 (3H, d, *J* = 6.0, CH<sub>3</sub>). δ<sub>c</sub> (176 MHz, CDCl<sub>3</sub>, mixture of diastereomers) 141.9(3) (ArC), 141.8(6) (ArC), 141.1 (ArC), 141.0 (ArC), 133.2(2) (ArC), 133.1(9) (ArC), 128.6(0) (ArC), 128.5(8) (ArC), 128.5(5) (ArC), 128.4(2) (ArC), 128.3(8) (ArC), 127.8 (ArC), 127.7 (ArC), 127.1 (ArC), 127.0 (ArC), 83.4 (Ar<sub>2</sub>CH), 68.3(2) (C-2'), 68.2(9) (C-2'), 60.5(9) (C-2), 60.5(6) (C-2), 54.9 (C-5), 54.8 (C-5), 53.4 (C-1'), 53.3 (C-1'), 32.5 (C-3), 32.4 (C-3), 22.0(0) (C-4), 21.9(9) (C-4), 18.9(3) (CH<sub>3</sub>), 18.9(1) (CH<sub>3</sub>). *m/z* (LC-MS, ESI<sup>+</sup>) 330 (M(<sup>35</sup>Cl)Na<sup>+</sup>), 332 (M(<sup>37</sup>Cl)Na<sup>+</sup>). Accurate mass: Found (M(<sup>35</sup>Cl)H<sup>+</sup>), 330.1636; C<sub>20</sub>H<sub>25</sub><sup>35</sup>ClNO requires *M*, 330.1625.

(2R) N-{2'-[(4''-Chlorophenyl)(phenyl)methoxy]ethyl}-2-methylpyrrolidine **38b**

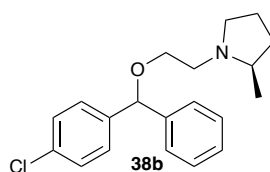

1-[(2-bromoethoxy)(phenyl)methyl]-4-chlorobenzene (326 mg, 1.03 mmol) in DMF (1 mL) was added dropwise to a suspension of the (*R*)-2-methyl-pyrrolidine hydrochloride (125 mg, 1.03 mmol), KI (17 mg, 0.10 mmol) and K<sub>2</sub>CO<sub>3</sub> (285 mg, 2.06 mmol) in DMF (1.5 mL). The reaction mixture was stirred at rt for 24 h. Following the addition of H<sub>2</sub>O (5 mL) and extraction with EtOAc (3 x 5 mL), the combined organic layers were dried and concentrated *in vacuo*. The crude product was purified by column chromatography (10% MeOH in CHCl<sub>3</sub>) to afford the title compound (217 mg, 65 %) as a brown oil.  $\nu_{\max}$  (ATR) 2962 (w), 2869 (w), 2786 (w), 1490 (m), 1453 (w), 1375 (w), 1185 (w), 1088 (s) 1015 (m).  $\delta_{\text{H}}$  (700 MHz, CDCl<sub>3</sub>, mixture of diastereomers) 7.33 – 7.23 (9H, m, ArH), 5.36 (1H, s, Ar<sub>2</sub>H), 3.62 – 3.55 (2H, m, 2'-H<sub>2</sub>), 3.16 – 3.11 (1H, m, 5-HH'), 3.09 – 3.03 (1H, m, 1'-HH'), 2.44 – 2.38 (1H, m, 5-HH'), 2.38 – 2.31 (1H, m, 2-H), 2.24 – 2.16 (1H, m, 1' -HH'), 1.93 – 1.85 (1H, m, 3-HH'), 1.80 – 1.62 (2H, m, 4-H<sub>2</sub>), 1.43 – 1.34 (1H, m, 3-HH'), 1.09 (1.5H, d, *J* = 6.0 Hz, CH<sub>3</sub>), 1.08 (1.5H, d, *J* = 6.0 Hz, CH<sub>3</sub>).  $\delta_{\text{C}}$  (176 MHz, CDCl<sub>3</sub>, mixture of diastereomers) 142.0(2) (ArC), 141.9(6) (ArC), 141.2 (ArC), 141.1 (ArC), 133.2(2) (ArC), 133.1(9) (ArC), 128.6(2) (ArC), 128.5(7) (ArC), 128.5 (ArC), 128.4 (ArC), 127.8 (ArC), 127.7 (ArC), 127.1(0) (ArC), 127.0(6) (ArC), 83.4 (Ar<sub>2</sub>CH), 68.6(0) (C-2'), 68.5(6) (C-2'), 60.4(3) (C-2), 60.4(0) (C-2), 55.0 (C-5), 54.9 (C-5), 53.5 (C-1'), 53.4 (C-1'), 32.6 (C-3), 22.0 (C-4), 19.2 (CH<sub>3</sub>). *m/z* (LC-MS, ESI<sup>+</sup>) 330 (M(<sup>35</sup>Cl)Na<sup>+</sup>), 332 (M(<sup>37</sup>Cl)Na<sup>+</sup>). Accurate mass: Found (M(<sup>35</sup>Cl)H<sup>+</sup>), 330.1630: C<sub>20</sub>H<sub>25</sub><sup>35</sup>ClNO requires *M*, 330.1625.

**Methyl (2*R*) N-{2'-[(4''-chlorophenyl)(phenyl)methoxy]ethyl}pyrrolidine-2-carboxylate **38c****

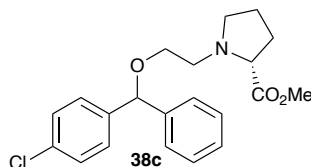

1-[(2-Bromoethoxy)(phenyl)methyl]-4-chlorobenzene (462 mg, 1.42 mmol) is dissolved in MeCN (7 mL) and D-proline methyl ester hydrochloride (282 mg, 1.70 mmol) and K<sub>2</sub>CO<sub>3</sub> (471 mg, 3.41 mmol) are added. The reaction is heated to 60 °C and left to stir overnight. The reaction was extracted with EtOAc (3 x 10 mL) and washed with H<sub>2</sub>O (10 mL) and dried over Na<sub>2</sub>SO<sub>4</sub>. The crude product was purified by reversed phase column chromatography (5 → 100% MeCN in H<sub>2</sub>O with 0.1% formic acid) to afford the title compound (161 mg, 30%) as a colourless oil.  $\nu_{\max}$  (ATR) 2950 (w), 2870 (w), 1733 (m), 1489 (m), 1455 (w), 1435 (w), 1196 (m), 1169 (m), 1087 (s), 1072 (m), 1012 (m) cm<sup>-1</sup>.  $\delta_{\text{H}}$  (700 MHz, CDCl<sub>3</sub>) 7.32 – 7.20 (9H, m, ArH), 5.31 – 5.29 (1H, m, Ar<sub>2</sub>CH), 3.58 – 3.53 (5H, m, 2'-H<sub>2</sub>, OCH<sub>3</sub>), 3.35 – 3.30 (1H, m, 2-H), 3.21 – 3.16 (1H, m, 1'-HH'), 2.97 – 2.91 (1H, m, 5-H), 2.84 – 2.78 (1H, m, 5-H), 2.53 – 2.46 (1H, m, 1'-HH'), 2.15 – 2.06 (1H, m, 3-HH'), 1.93 – 1.83 (2H, m, 4-H<sub>2</sub>), 1.81 – 1.74 (1H, m, 3-HH').  $\delta_{\text{C}}$  (176 MHz, CDCl<sub>3</sub>, mixture of diastereomers) 174.6(8) (CO), 174.6(5) (CO), 141.8(8) (ArC), 141.8(5) (ArC), 141.1 (ArC), 141.0 (ArC), 133.2 (ArC), 133.1 (ArC), 128.5(7) (ArC), 128.5(5) (ArC), 128.5(2) (ArC), 128.5(0) (ArC), 128.4 (ArC), 128.3 (ArC), 127.7(3) (ArC), 127.6(5) (ArC), 127.1 (ArC), 126.9 (ArC), 83.3 (Ar<sub>2</sub>CH), 68.2(1) (C-2'), 68.1(8) (C-2'), 65.9(4) (C-2), 65.9(2)



(C-2), 54.5 (C-5), 54.0(3) (C-1'), 53.9(9) (C-1'), 51.7 (OCH<sub>3</sub>), 29.7 (C-3), 29.6 (C-3), 23.4(0) (C-4), 23.3(9) (C-4). *m/z* (LC-MS, ESI<sup>+</sup>) 396.343 (M(<sup>35</sup>Cl)Na<sup>+</sup>), 398.256 (M(<sup>37</sup>Cl)Na<sup>+</sup>). Accurate mass: Found (M(<sup>35</sup>Cl)H<sup>+</sup>), 374.1530: C<sub>21</sub>H<sub>25</sub><sup>35</sup>ClNO<sub>3</sub> requires *M*, 374.1523.

[(2*R*) *N*-{2'-[(4''-Chlorophenyl)(phenyl)methoxy]ethyl}pyrrolidin-2-yl]methanol **38d**

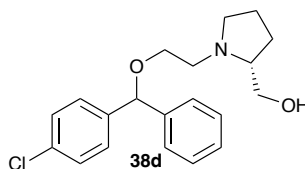

To a 0 °C solution of methyl (2*R*)-1-[2-[(4-chlorophenyl)(phenyl)methoxy]ethyl]pyrrolidine-2-carboxylate (**R**)-**38c** (115 mg, 0.30 mmol) in THF (4 mL) was slowly added LiAlH<sub>4</sub> (2.4M solution in THF, 0.31 mL, 0.75 mmol), before being warmed to rt and stirred for 3h. The reaction mixture was then cooled in an ice bath and any reactive salts were quenched according to Fieser's method. The product was purified by reversed phase column chromatography (5 → 100% MeCN in H<sub>2</sub>O with 0.1% formic acid). To afford the title compound (64 mg, 62%) as a yellow oil.  $\nu_{\max}$  (ATR) 3392 (br, w), 2946 (w), 2870 (w), 1489 (m), 1453 (w), 1403 (w), 1295 (w), 1185 (w), 1086 (s), 1028 (m), 1014 (s) cm<sup>-1</sup>.  $\delta_{\text{H}}$  (700 MHz, CDCl<sub>3</sub>) 7.35 - 7.23 (9H, m, ArH), 5.35 (1H, s, Ar<sub>2</sub>CH), 3.68 - 3.63 (1H, m, HOCHH'), 3.63 - 3.56 (2H, m, 2'-H<sub>2</sub>), 3.45 - 3.40 (1H, m, HOCHH'), 3.27 - 3.18 (1H, m, 5-HH'), 3.14 - 3.06 (1H, m, 1'-HH'), 2.85 - 2.75 (1H, m, 2-H), 2.71 - 2.65 (1H, m, 1-HH'), 2.48 - 2.38 (1H, m, 5-HH'), 1.93 - 1.85 (1H, m, 4-HH'), 1.81 - 1.70 (3H, m, 4-HH', 3-H<sub>2</sub>).  $\delta_{\text{C}}$  (176 MHz, CDCl<sub>3</sub>, mixture of diastereomers) 141.7 (ArC), 141.6 (ArC), 140.9 (ArC), 140.8 (ArC), 133.4 (ArC), 133.3 (ArC), 128.6(9) (ArC), 128.6(8) (ArC), 128.6(6) (ArC), 128.3(2) (ArC), 128.2(8) (ArC), 127.9 (ArC), 127.8 (ArC), 127.0 (ArC), 126.9 (ArC), 83.5(3) (Ar<sub>2</sub>CH), 83.5(1) (Ar<sub>2</sub>CH), 67.9(5) (C-2'), 67.8(9) (C-2'), 65.7 (C-2), 62.4(1) (CH<sub>2</sub>OH), 62.3(8) (CH<sub>2</sub>OH), 55.1(8) (C-5), 55.1(6) (C-5), 54.5 (C-1'), 27.5 (C-3), 24.1 (C-4). *m/z* (LC-MS, ESI<sup>+</sup>) 368 (M(<sup>35</sup>Cl)Na<sup>+</sup>), 370 (M(<sup>37</sup>Cl)Na<sup>+</sup>). Accurate mass: Found (M(<sup>35</sup>Cl)H<sup>+</sup>), 346.1579: C<sub>20</sub>H<sub>25</sub><sup>35</sup>ClNO<sub>2</sub> requires *M*, 346.1574.

(2*R*) *N*-{2-[(4-chlorophenyl)(phenyl)methoxy]ethyl}-2-(methoxymethyl)pyrrolidine **38e**

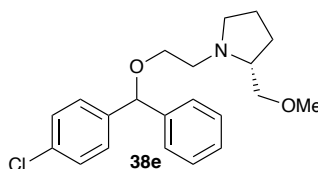

1-[(2-bromoethoxy)(phenyl)methyl]-4-chlorobenzene (160 mg, 0.49 mmol) in DMF (0.8 mL) was added dropwise to a suspension of (2*R*) 2-methoxymethylpyrrolidine (0.06 mL, 0.49 mmol), KI (8.3 mg, 0.08 mmol) and K<sub>2</sub>CO<sub>3</sub> (135 mg, 0.98 mmol) in DMF (0.5 mL). The reaction mixture was stirred at rt for 4 h. Following the addition of H<sub>2</sub>O (5 mL) and extraction with EtOAc (3 x 5mL), the combined organic layers were dried over Na<sub>2</sub>SO<sub>4</sub> and concentrated *in vacuo*. The crude product was purified by column

chromatography (10% MeOH in CHCl<sub>3</sub>) to afford the title compound (114 mg, 65 %) as a brown oil.  $\nu_{\max}$  (ATR) 2871 (w), 2810 (w), 1489 (m), 1453 (w), 1185 (w), 1088 (s), 1015 (m).  $\delta_{\text{H}}$  (700 MHz, CDCl<sub>3</sub>) 7.33 – 7.23 (9H, m, ArH), 5.37 (1H, s, Ar<sub>2</sub>CH), 3.74 – 3.57 (2H, m, 2'-H<sub>2</sub>), 3.56 – 3.41 (1H, m, 1-HH'), 3.37 – 3.29 (4H, m, CH<sub>3</sub>, 1-HH'), 3.29 – 3.11 (2H, m, 1'-HH', 5-HH'), 2.95 – 2.60 (2H, m, 1'-HH', 2-H), 2.58 – 2.32 (1H, m, 5-HH'), 1.97 – 1.86 (1H, m, 3-HH'), 1.86 – 1.70 (2H, m, 4-H<sub>2</sub>), 1.70 – 1.57 (1H, m, 3-HH').  $\delta_{\text{C}}$  (176 MHz, CDCl<sub>3</sub>, mixture of diastereomers) 141.8 (ArC), 141.7 (ArC), 141.0 (ArC), 140.9 (ArC), 133.3 (ArC), 133.2 (ArC), 128.6(3) (ArC), 128.6(1) (ArC), 128.5(9) (ArC), 128.4(4) (ArC), 128.3(8) (ArC), 127.8(2) (ArC), 127.7(7) (ArC), 127.1 (ArC), 127.0 (ArC), 83.4 (Ar<sub>2</sub>CH), 75.4 (C-1), 67.8 (C-2'), 64.3 (C-2), 59.2 (CH<sub>3</sub>), 55.6 (C-5), 55.5 (C-5), 54.9 (C-1'), 28.0 (C-3), 23.2 (C-4).  $m/z$  (LC-MS, ESI<sup>+</sup>) 382 (M(<sup>35</sup>Cl)Na<sup>+</sup>), 384 (M(<sup>37</sup>Cl)Na<sup>+</sup>). Accurate mass: Found (MH<sup>+</sup>), 360.1734: C<sub>21</sub>H<sub>27</sub>NO<sub>2</sub><sup>35</sup>Cl requires *M*, 360.1730.

*N*-{2'-[(4''-Chlorophenyl)(phenyl)methoxy]ethyl}pyrrolidine **38f**

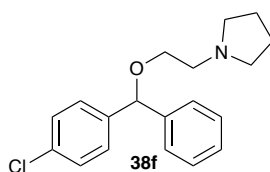

1-[(2-Bromoethoxy)(phenyl)methyl]-4-chlorobenzene (117 mg, 0.36 mmol) was dissolved in MeCN (3 mL) and pyrrolidine (0.04 mL, 0.43 mmol) and K<sub>2</sub>CO<sub>3</sub> (69 mg, 0.50 mmol) were added. The reaction was heated to 60 °C and left to stir overnight. The reaction mixture was extracted with EtOAc (3 x 5 mL) and washed with H<sub>2</sub>O (5 mL) and dried over Na<sub>2</sub>SO<sub>4</sub>. The crude product was purified by reversed phase column chromatography (5 → 100% MeCN in H<sub>2</sub>O with 0.1% formic acid) to afford the title compound (61 mg, 54%) as a yellow oil.  $\nu_{\max}$  (ATR) 2962 (w), 2787 (w), 1490 (m), 1453 (w), 1088 (s), 1015 (m) cm<sup>-1</sup>.  $\delta_{\text{H}}$  (700 MHz, CDCl<sub>3</sub>) 7.33 – 7.23 (9H, m, ArH), 5.35 (1H, s, Ar<sub>2</sub>CH), 3.62 (2H, t, *J* = 6.0 Hz, 2'-H<sub>2</sub>), 2.82 (2H, t, *J* = 6.0 Hz, 1'-H<sub>2</sub>), 2.66 – 2.61 (4H, m, 2-H<sub>2</sub>, 5-H<sub>2</sub>), 1.82 – 1.76 (4H, m, 3-H<sub>2</sub>, 4-H<sub>2</sub>).  $\delta_{\text{C}}$  (176 MHz, CDCl<sub>3</sub>) 141.8 (ArC), 141.0 (ArC), 133.3 (ArC), 128.6(2) (ArC), 128.5(9) (ArC), 128.4 (ArC), 127.8 (ArC), 127.1 (ArC), 83.4 (Ar<sub>2</sub>CH), 68.2 (C-2'), 55.7 (C-1'), 54.8 (C-2, C-5), 23.6 (C-3, C-4).  $m/z$  (LC-MS, ESI<sup>+</sup>) 316 (M(<sup>35</sup>Cl)H<sup>+</sup>), 318 (M(<sup>37</sup>Cl)H<sup>+</sup>). Accurate mass: Found (M(<sup>35</sup>Cl)H<sup>+</sup>), 316.1461: C<sub>19</sub>H<sub>23</sub><sup>35</sup>ClNO requires *M*, 316.1468.

(2*S*) *N*-{4'-[(4''-chlorophenyl)(phenyl)methoxy]but-1'-yl}-2-methylpyrrolidine **38g**

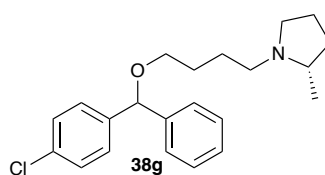

1-[(4-bromobutoxy)(phenyl)methyl]-4-chlorobenzene (106 mg, 0.3 mmol) in DMF (0.5 mL) was added dropwise to a suspension of (2R)-2-methylpyrrolidine hydrochloride (46 mg, 0.38 mmol), KI (7 mg, 0.04 mmol) and K<sub>2</sub>CO<sub>3</sub> (105 mg, 0.76 mmol) in DMF (1 mL). The reaction was stirred at rt for 24 h. Following the addition of EtOAc (10 mL), the organic layer was washed with H<sub>2</sub>O (5 x 10 mL), dried over Na<sub>2</sub>SO<sub>4</sub>, filtered and concentrated *in vacuo*. The crude product was purified by column chromatography (0 → 100% EtOAc in hexanes with 1% NEt<sub>3</sub>) to afford the title compound as a colourless oil (49 mg, 46 %).  $\nu_{\max}$  (ATR) 2954 (w), 2867 (w), 2789 (w), 1490 (m), 1453 (w), 1089 (s), 1015 (m).  $\delta_{\text{H}}$  (600 MHz, CDCl<sub>3</sub>) 7.31 – 7.28 (4H, m, ArH), 7.27 – 7.21 (5H, m, ArH), 5.28 (1H, s, Ar<sub>2</sub>CH), 3.47 – 3.41 (2H, m, 3'-H<sub>2</sub>), 3.18 – 3.12 (1H, m, 5-HH'), 2.81 – 2.74 (1H, m, 1'-HH'), 2.29 – 2.19 (1H, m, 2-H), 2.09 – 1.96 (2H, m, 5-HH', 1'-HH'), 1.93 – 1.85 (1H, m, 3-HH'), 1.81 – 1.72 (1H, m, 4-HH'), 1.72 – 1.55 (5H, m, 4-HH', 3'-H<sub>2</sub>, 2'-H<sub>2</sub>), 1.45 – 1.38 (1H, m, 3-HH'), 1.07 (3H, d, *J* = 6.0, CH<sub>3</sub>).  $\delta_{\text{C}}$  (176 MHz, CDCl<sub>3</sub>, mixture of diastereomers) 142.2(1) (C-1'<sup>Ph</sup>), 142.2(0) (C-1'<sup>Ph</sup>), 141.3 (C-1<sup>Ph</sup>), 133.2 (C-4<sup>Ph</sup>), 128.6(0) (ArC), 128.5(9) (ArC), 128.5(7) (ArC), 128.5(6) (ArC), 128.3(9) (ArC), 128.3(8) (ArC), 127.7 (C-4'<sup>Ph</sup>), 127.0(3) (ArC), 127.0(1) (ArC), 83.1 (Ar<sub>2</sub>CH), 69.1(6) (C-4'), 69.1(5) (C-4'), 60.5 (C-2), 54.3 (C-1'), 54.2 (C-1'), 54.1 (C-5), 32.8 (C-3), 28.2(4) (C-2'), 28.2(3) (C-2'), 25.7 (C-3'), 21.7 (C-4), 19.0 (CH<sub>3</sub>). *m/z* (LC-MS, ESI<sup>+</sup>) 358 (M(<sup>35</sup>Cl)H<sup>+</sup>), 360 (M(<sup>37</sup>Cl)H<sup>+</sup>). Accurate mass: Found (MH<sup>+</sup>), 358.1949: C<sub>22</sub>H<sub>28</sub><sup>35</sup>ClNO requires *M*, 358.1938.

(2S) N-{3'-[(4''-chlorophenyl)(phenyl)methoxy]prop-1'-yl}-2-methylpyrrolidine **38h**

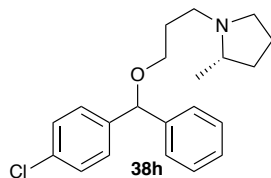

1-[(3'-bromopropoxy)(phenyl)methyl]-4-chlorobenzene (320 mg, 0.94 mmol) in DMF (5 mL) was added dropwise to a suspension of (2S)-2-methylpyrrolidine hydrochloride (115 mg, 0.94 mmol), KI (17g, 0.1 mmol) and K<sub>2</sub>CO<sub>3</sub> (210mg, 1.88 mmol) in DMF (10 mL). The reaction was then stirred at rt for 24 h. Following the addition of EtOAc (10 mL), the organic layer was washed with H<sub>2</sub>O (5 x 10 mL), dried over Na<sub>2</sub>SO<sub>4</sub>, filtered and concentrated *in vacuo*. The crude product was purified by column chromatography (10% MeOH in CHCl<sub>3</sub>) to afford the title compound (217 mg, 65 %) as a colourless oil.  $\nu_{\max}$  (ATR) 2960 (w), 2869 (w), 2789 (w), 1489 (m), 1087 (s), 1014 (m).  $\delta_{\text{H}}$  (600 MHz, CDCl<sub>3</sub>, mixture of diastereomers) 7.32 – 7.29 (4H, m, ArH), 7.28 – 7.26 (4H, m, ArH), 7.26 – 7.22 (1H, m, ArH), 5.30 (1H, s, Ar<sub>2</sub>CH), 3.51 – 3.47 (2H, m, 3'-H<sub>2</sub>), 3.17 – 3.09 (1H, m, 5-HH'), 2.95 – 2.86 (1H, m, 1'-HH'), 2.31 – 2.22 (1H, m, 2-H), 2.16 – 2.10 (1H, m, 1'-HH'), 2.10 – 2.04 (1H, m, 5-HH'), 1.93 – 1.81 (3H, m, 2'-H<sub>2</sub>, 3-HH'), 1.80 – 1.71 (1H, m, 4-HH'), 1.70 – 1.62 (1H, m, 4-HH'), 1.46 – 1.36 (1H, m, 3-HH'), 1.08 (1.5H, d, *J* = 6.0, CH<sub>3</sub>), 1.08 (1.5H, d, *J* = 6.0, CH<sub>3</sub>).  $\delta_{\text{C}}$  (151 MHz, CDCl<sub>3</sub>, mixture of diastereomers) 142.2 (C-1'<sup>Ph</sup>), 141.2(8) (C-1<sup>Ph</sup>), 141.2(8) (C-1<sup>Ph</sup>), 133.1(3) (C-4<sup>Ph</sup>), 133.1(2) (C-4<sup>Ph</sup>), 128.5(7) (ArC), 128.5(5) (ArC), 128.5(4) (ArC), 128.5(2) (ArC), 128.4 (ArC), 127.6(6)

(C-4<sup>Ph</sup>), 127.6(5) (C-4<sup>Ph</sup>), 127.0 (ArC), 83.0 (Ar<sub>2</sub>CH), 67.8(3) (C-3'), 67.8(0) (C-3'), 60.3 (C-2), 54.0(7) (C-5), 54.0(6) (C-5), 51.3 (C-1'), 51.2 (C-1'), 32.8 (C-3), 29.2 (C-2'). 21.7 (C-4), 19.1 (CH<sub>3</sub>). *m/z* (LC-MS, ESI<sup>+</sup>) 344 (M(<sup>35</sup>Cl)H<sup>+</sup>), 346 (M(<sup>37</sup>Cl)H<sup>+</sup>). Accurate mass: Found (M(<sup>35</sup>Cl)H<sup>+</sup>), 344.1784: C<sub>21</sub>H<sub>27</sub><sup>35</sup>ClNO requires *M*, 344.1781.

(2*S*) *N*-{2'-[(*S*)-(4''-chlorophenyl)(phenyl)methoxy]ethyl}-2-methylpyrrolidine **38i**

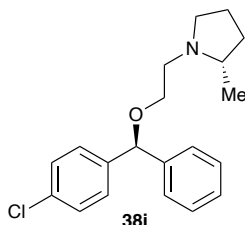

General procedure E was used in the reaction of (*S*)-4-chlorophenyl(phenyl)methanol (**S-5a**) (119 mg, 0.43 mmol) and (2*S*) *N*-(2'-chloroethyl)-2-methylpyrrolidine (63 mg, 0.43 mmol). The crude product was purified by flash column chromatography (0 → 100% EtOAc in hexanes with 1% NEt<sub>3</sub>) to afford the title compound (78mg, 55%) as a colourless oil.  $\nu_{\max}$  (ATR) 2962 (w), 2869 (w), 2787 (w), 1489 (m), 1453 (w), 1375 (w), 1086 (s), 1014 (m).  $\delta_{\text{H}}$  (700 MHz, CDCl<sub>3</sub>) 7.31 - 7.22 (9H, m, ArH), 5.34 (1H, s, Ar<sub>2</sub>CH), 3.57 (2H, t, *J* = 6.5 Hz, 2'-H<sub>2</sub>), 3.15 - 3.09 (1H, m, 5-HH'), 3.04 (1H, dt, *J* = 12.5, 6.5 Hz, 1'-HH'), 2.39 (1H, dt, *J* = 12.5, 6.5 Hz, 1'-HH'), 2.36 - 2.30 (1H, m, 2-H), 2.22 - 2.16 (1H, m, 5-HH'), 1.91 - 1.84 (1H, m, 3-HH'), 1.78 - 1.69 (1H, m, 4-HH'), 1.69 - 1.61 (1H, m, 4-HH'), 1.41 - 1.33 (1H, m, 3-HH'), 1.07 (3H, d, *J* = 6.0 Hz, CH<sub>3</sub>).  $\delta_{\text{C}}$  (176 MHz, CDCl<sub>3</sub>) 142.0 (ArC), 141.2 (ArC), 133.2 (ArC), 128.6(1) (ArC), 128.6(0) (ArC), 128.4 (ArC), 127.8 (ArC), 127.1 (ArC), 83.4 (Ar<sub>2</sub>CH), 68.6 (C-2'), 60.5 (C-2), 54.9 (C-5), 53.4 (C-1'), 32.6 (C-3), 22.0 (C-4), 19.1 (CH<sub>3</sub>). *m/z* (LC-MS, ESI<sup>+</sup>) 330 (M(<sup>35</sup>Cl)H<sup>+</sup>), 332 (M(<sup>37</sup>Cl)H<sup>+</sup>). Accurate mass: Found (MH<sup>+</sup>), 330.1624: C<sub>20</sub>H<sub>25</sub>NO<sup>35</sup>Cl requires *M*, 330.1625.

(2*R*) *N*-{2'-[(*S*)-(4''-chlorophenyl)(phenyl)methoxy]ethyl}-2-methylpyrrolidine **38j**

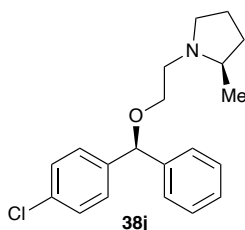

General procedure E was used in the reaction of (*S*)-4-chlorophenyl(phenyl)methanol (**S-5b**) (67 mg, 0.24 mmol) and (2*R*)-1-(2'-chloroethyl)-2-methylpyrrolidine (12 mg, 0.08 mmol). The crude product was purified by flash column chromatography (0 → 100% EtOAc in hexanes with 1% NEt<sub>3</sub>) to afford the title compound (15 mg, 57 %) as a colourless oil.  $\nu_{\max}$  (ATR) 2963 (w), 2870 (w), 2789 (w), 1490 (w), 1453 (w), 1375 (w), 1089 (m), 1015 (w).  $\delta_{\text{H}}$  (700 MHz, CDCl<sub>3</sub>) 7.33 - 7.29 (4H, m, ArH), 7.29 - 7.27 (4H, m, ArH), 7.26

– 7.23 (1H, m, ArH), 5.36 (1H, s, Ar<sub>2</sub>CH), 3.69 – 3.54 (2H, m, 2'-H<sub>2</sub>), 3.22 – 3.14 (1H, m, 5-HH'), 3.12 – 3.05 (1H, m, 1'-HH'), 2.54 – 2.36 (2H, m, 1-HH', 2-H), 2.34 – 2.22 (1H, m, 5-HH'), 1.98 – 1.86 (1H, m, 3-HH'), 1.84 – 1.74 (1H, m, 4-HH'), 1.73 – 1.64 (1H, m, 4-HH'), 1.49 – 1.36 (1H, m, 3-HH'), 1.12 (3H, d, *J* = 6.0 Hz, CH<sub>3</sub>). δ<sub>c</sub> (176 MHz, CDCl<sub>3</sub>) 141.9 (ArC), 141.0 (ArC), 133.3 (ArC), 128.7 (ArC), 128.6 (ArC), 128.5 (ArC), 127.8 (ArC), 127.1 (ArC), 83.5 (Ar<sub>2</sub>CH), 68.2 (C-2'), 60.7 (C-2), 54.8 (C-5), 53.4 (C-1'), 32.4 (C-3), 22.0 (C-4), 18.9 (CH<sub>3</sub>). *m/z* (LC-MS, ESI<sup>+</sup>) 330 (M(<sup>35</sup>Cl)H<sup>+</sup>), 332 (M(<sup>37</sup>Cl)H<sup>+</sup>). Accurate mass: Found (MH<sup>+</sup>), 330.1634: C<sub>20</sub>H<sub>25</sub>NO<sup>35</sup>Cl requires *M*, 330.1625.

**(2R)-N-{2'-[(R)-(4''-chlorophenyl)(phenyl)methoxy]ethyl}-2-methylpyrrolidine 38k**

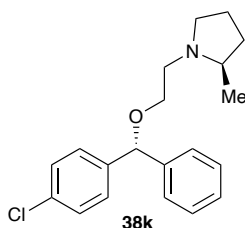

General procedure E was used in the reaction of (*R*)-4-chlorophenyl(phenyl)methanol (100 mg, 0.36 mmol) and (2*R*)-1-(2-chloroethyl)-2-methylpyrrolidine (**R**)-10b (53 mg, 0.36 mmol). The crude product was purified by flash column chromatography (0 → 100% EtOAc in hexanes with 1% NEt<sub>3</sub>) to afford the title compound as a colourless oil (72 mg, 61%). ν<sub>max</sub> (ATR) 2962 (w), 2869 (w), 2788 (w), 1490 (w), 1088 (m), 1015 (w). δ<sub>H</sub> (700 MHz, CDCl<sub>3</sub>) 7.32 – 7.20 (9H, m, ArH), 5.35 (1H, s, Ar<sub>2</sub>CH), 3.58 (2H, td, *J* = 6.5, 1.5 Hz, 2'-H<sub>2</sub>), 3.16 – 3.12 (1H, m, 5-HH'), 3.06 (1H, dt, *J* = 12.5, 6.5 Hz, 1'-HH'), 2.41 (1H, dt, *J* = 12.5, 6.5 Hz, 1'-HH'), 2.38 – 2.32 (1H, m, 2-H), 2.24 – 2.18 (1H, m, 5-HH'), 1.91 – 1.85 (1H, m, 3-HH'), 1.80 – 1.71 (1H, m, 4-HH'), 1.70 – 1.63 (1H, m, 4-HH'), 1.42–1.35 (1H, m, 3-HH'), 1.09 (3H, d, *J* = 6.0 Hz, CH<sub>3</sub>). δ<sub>c</sub> (176 MHz, CDCl<sub>3</sub>) 141.9 (ArC), 141.1 (ArC), 133.2 (ArC), 128.5(8) (ArC), 128.5(7) (ArC), 128.4 (ArC), 127.7 (ArC), 127.1 (ArC), 83.4 (Ar<sub>2</sub>CH), 68.5 (C-2'), 60.5 (C-2), 54.9 (C-5), 53.4 (C-1'), 32.5 (C-3), 22.0 (C-4), 19.1 (CH<sub>3</sub>). *m/z* (LC-MS, ESI<sup>+</sup>) 330 (M(<sup>35</sup>Cl)H<sup>+</sup>), 332 (M(<sup>37</sup>Cl)H<sup>+</sup>). Accurate mass: Found (MH<sup>+</sup>), 330.1632: C<sub>20</sub>H<sub>25</sub>NO<sup>35</sup>Cl requires *M*, 330.1625.

**(2S)-N-{3'-[(R)-(4''-chlorophenyl)(phenyl)methoxy]propyl}-2-methylpyrrolidine 38l**

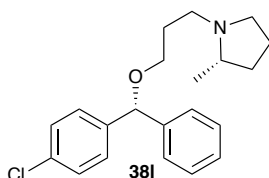

General procedure E was used for the reaction of (*R*)-4-chlorophenyl(phenyl)methanol **5b** (76 mg, 0.27 mmol) and (2*R*)-1-(2-chloropropyl)-2-methylpyrrolidine (101 mg, 0.62 mmol). The crude product was purified by flash column chromatography (0 → 100% EtOAc in hexanes with 1% NEt<sub>3</sub>) to afford the title

compound (78 mg, 55%) as a colourless oil.  $\nu_{\max}$  (ATR) 2960 (w), 1489 (w), 1089 (w).  $\delta_{\text{H}}$  (700 MHz,  $\text{CDCl}_3$ ) 7.32 – 7.29 (4H, m, ArH), 7.27 – 7.22 (5H, m, ArH), 5.30 (1H, s,  $\text{Ar}_2\text{CH}$ ), 3.49 (2H, td,  $J = 6.0, 1.5$  Hz,  $3'\text{-H}_2$ ), 3.21 – 3.15 (1H, m,  $5\text{-HH}'$ ), 2.98 – 2.90 (1H, m,  $1'\text{-HH}'$ ), 2.39 – 2.31 (1H, m,  $2\text{-H}$ ), 2.22 – 2.10 (2H, m,  $1'\text{-HH}'$ ,  $5\text{-HH}'$ ), 1.96 – 1.85 (3H, m,  $2'\text{-H}_2$ ,  $3\text{-HH}'$ ), 1.83 – 1.75 (1H, m,  $4\text{-HH}'$ ), 1.73 – 1.65 (1H, m,  $4\text{-HH}'$ ), 1.50 – 1.42 (1H, m,  $3\text{-HH}'$ ), 1.12 (3H, d,  $J = 6.0$  Hz,  $\text{CH}_3$ ).  $\delta_{\text{C}}$  (176 MHz,  $\text{CDCl}_3$ ) 142.1 ( $\text{C-1}^{\text{Ph}}$ ), 141.2 ( $\text{C-1}^{\text{Ph}}$ ), 133.2 ( $\text{C-4}^{\text{Ph}}$ ), 128.5(7) (ArC), 128.5(6) (ArC), 128.4 (ArC), 127.7 ( $\text{C-4}^{\text{Ph}}$ ), 127.0 (ArC), 83.0 ( $\text{Ar}_2\text{CH}$ ), 67.6 ( $\text{C-3}'$ ), 60.7 ( $\text{C-2}$ ), 53.9 ( $\text{C-5}$ ), 51.2 ( $\text{C-1}'$ ), 32.7 ( $\text{C-3}$ ), 28.9 ( $\text{C-2}'$ ), 21.7 ( $\text{C-4}$ ), 18.7 ( $\text{CH}_3$ ).  $m/z$  (LC-MS,  $\text{ESI}^+$ ) 344 ( $\text{M}^{(35}\text{Cl})\text{H}^+$ ), 346 ( $\text{M}^{(37}\text{Cl})\text{H}^+$ ). Accurate mass: Found ( $\text{MH}^+$ ), 344.1783:  $\text{C}_{21}\text{H}_{27}\text{NO}^{35}\text{Cl}$  requires  $M$ , 344.1781.

*(2R)* *N*-{3'-[(*R*)-(4''-chlorophenyl)(phenyl)methoxy]propyl}-2-methylpyrrolidine **38m**

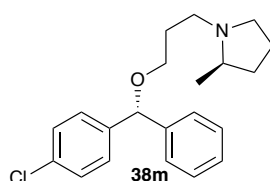

General procedure E was used for the reaction of (*R*)-(4-chlorophenyl)(phenyl)methanol **R-5b** (100 mg, 0.45 mmol) and (*2R*)-1-(3-chloropropyl)-2-methylpyrrolidine hydrochloride (109 mg, 0.55 mmol). The crude product was purified by flash column chromatography (0 → 100% EtOAc in hexanes with 1%  $\text{NEt}_3$ ) to afford the title compound (66 mg, 42%) as a colourless oil.  $\delta_{\text{H}}$  (400 MHz,  $\text{CDCl}_3$ )  $\delta$  7.32 – 7.30 (m, 4H), 7.29 – 7.27 (m, 5H), 5.31 (s, 1H), 3.49 (t,  $J = 6.4$  Hz, 2H), 3.19 – 3.08 (m, 1H), 2.90 (ddd,  $J = 11.7, 9.5, 6.7$  Hz, 1H), 2.24 (dt,  $J = 8.6, 6.5$  Hz, 1H), 2.14 – 2.02 (m, 2H), 1.96 – 1.63 (m, 5H), 1.41 (dddd,  $J = 12.3, 10.6, 8.7, 6.0$  Hz, 1H), 1.07 (d,  $J = 6.1$  Hz, 3H).  $\delta_{\text{C}}$  (101 MHz,  $\text{CDCl}_3$ )  $\delta$  141.85, 140.96, 132.84, 128.30, 128.26, 128.07, 127.38, 126.71, 82.65, 67.58, 60.00, 53.81, 51.01, 32.52, 28.95, 21.40, 18.84. Accurate mass: Found ( $\text{MH}^+$ ), 344.1764:  $\text{C}_{21}\text{H}_{27}\text{NO}^{35}\text{Cl}$  requires  $M$ , 344.1781.

*1*-{3'-[(*R*)-(4-chlorophenyl)(phenyl)methoxy]propyl}-2,2-dimethylpyrrolidine **38n**

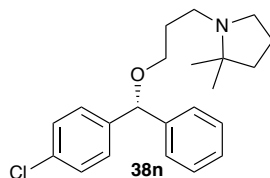

General procedure E was used for the reaction of (*R*)-4-chlorophenyl(phenyl)methanol (**R**)-**5b** (100 mg, 0.46 mmol) and 1-(3-chloropropyl)-2,2-dimethylpyrrolidine hydrochloride (116.4 mg, 0.55 mmol). The crude product was purified by flash column chromatography (0 → 100% EtOAc in hexanes with 1%  $\text{NEt}_3$ ) to afford the title compound as a colourless oil.  $\delta_{\text{H}}$  (400 MHz,  $\text{CDCl}_3$ )  $\delta$  7.31 (d,  $J = 3.9$  Hz, 4H), 7.27 (d,  $J = 6.8$  Hz, 5H), 5.31 (s, 1H), 3.50 (t,  $J = 6.3$  Hz, 2H), 2.72 (t,  $J = 6.9$  Hz, 2H), 2.46 (t,  $J = 7.4$  Hz, 2H), 1.86 – 1.68 (m, 4H), 1.63 (t,  $J = 7.9$  Hz, 2H), 0.96 (s, 6H).  $\delta_{\text{C}}$  (101 MHz,  $\text{CDCl}_3$ )  $\delta$  142.26, 141.38, 133.16, 128.60, 128.57,

128.45, 127.69, 127.08, 82.98, 67.83, 51.06, 45.86, 40.02, 29.92, 22.80, 22.74, 20.52. Accurate mass: Found (MH<sup>+</sup>), 358.1927: C<sub>22</sub>H<sub>29</sub>NO<sup>35</sup>Cl requires *M*, 358.1930.

1-{3-[(*R*)-(4-chlorophenyl)(phenyl)methoxy]propyl}pyrrolidine **38o**

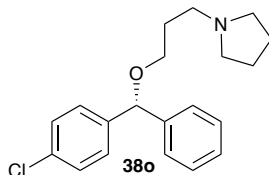

General procedure E was used for the reaction of (*R*)-4-chlorophenyl(phenyl)methanol (**R**)-**5b** (100 mg, 0.46 mmol) and 1-(3-chloropropyl)pyrrolidine hydrochloride (101 mg, 0.55 mmol). The crude product was purified by flash column chromatography (0→100% EtOAc in hexanes with 1% NEt<sub>3</sub>) to afford the title compound as a colourless oil. δ<sub>H</sub> (400 MHz, CDCl<sub>3</sub>) δ 7.34 – 7.29 (m, 4H), 7.27 (d, *J* = 5.6 Hz, 5H), 5.31 (s, 1H), 3.49 (t, *J* = 6.4 Hz, 2H), 2.57 – 2.52 (m, 2H), 2.52 – 2.44 (m, 4H), 1.91 – 1.82 (m, 2H), 1.76 (q, *J* = 3.4 Hz, 4H). δ<sub>C</sub> (101 MHz, CDCl<sub>3</sub>) δ 142.19, 141.31, 133.18, 128.61, 128.58, 128.40, 127.71, 127.03, 83.00, 67.79, 54.38, 53.64, 29.61, 23.58. Accurate mass: Found (MH<sup>+</sup>), 330.1622: C<sub>20</sub>H<sub>25</sub>NO<sup>35</sup>Cl requires *M*, 358.1625.

## 4.2. Biological Methods

### 4.2.1. General experimental details

**MATERIALS:** Biological grade materials, solvents, reagents and media components were purchased from commercial suppliers and used as provided. NBD-C<sub>6</sub>-ceramide **80** was obtained from Invitrogen and AG 4-X4 ion exchange resin from Bio-Rad. Reactions and media were prepared using ultrapure water from Milli-Q® water purification system. FBS refers to heat-inactivated foetal bovine serum. Solutions of test compounds were made up in DMSO, unless otherwise stated.

**INSTRUMENTS AND EQUIPMENT:** 1.5 mL Eppendorfs were used during the preparation of serial dilutions. Media were filter-sterilised using a vacuum filter with a 0.22 µm pore CA membrane. Centrifugation steps were carried out using Sorvall® Legend RT centrifuge, Sorvall® Legend Micro 17R centrifuge, Beckman Coulter® centrifuges and ultracentrifuges. Eppendorf tubes were centrifuged using Sigma 1-14 microfuge. Disruption of yeast cells was performed using an IKA® Vortex Genius 3. Protein content and optical density (OD) were determined using a Boeco S-32 spectrophotometer. Eppendorf contents were dried using an Eppendorf Vacuum Concentrator 5301. Cells were counted using a Neubauer haemocytometer. 96-well plates used were Nest Biotechnology Co., Ltd cell culture plates (clear); Corning® Costar® cell culture plates (clear); Corning® V-bottom (clear); MultiScreen® Solvinert filter plates (Merck Millipore) and PerkinElmer OptiPlate-96 (black). 24-well plates were supplied by Nest Biotechnology Co., Ltd and cover slips from Thomas Scientific®. Fluorescence quantification was carried out using SpectraMax® microplate reader with SoftMax® Pro 6.4 data analysis software from Molecular Devices and Synergy H4 and FLx800 microplate readers with Gen5® 1.08 data analysis software from Biotek. HPTLC silica plates were from Merck Millipore and imaged using a Fuji FLA-3000 plate reader with AIDA image analyser® (version 3.52).

### 4.2.2. Protocols

All of the following biological procedures were carried out under sterile conditions unless otherwise stated.

#### 4.2.2.1. *Leishmania* culture

*Leishmania amazonensis* (MHOM/Br/75/JOSEFA), *Leishmania major* (FV1) WT and  $\Delta$  LCB2 promastigotes were maintained at 26 °C in Schneider's insect medium at pH 7, supplemented with 15% FBS. *Leishmania major* (FV1) PX promastigotes were maintained at 26 °C in Schneider's insect medium at pH 7,



supplemented with 15% FBS and 40  $\mu\text{g mL}^{-1}$  G418 (Gibco BRL). *Leishmania amazonensis*-GFP were selected for bright green fluorescence by 48 h-incubation in the presence of 1000  $\mu\text{g mL}^{-1}$  G418 (Gibco BRL).

#### **4.2.2.2. Animals and ethics statement**

All mice used in the experiments were maintained under controlled temperature, filtered air and water, autoclave bedding, and commercial food at the animal facilities at Federal University of Rio de Janeiro.

The animal protocols for this study were approved by the Federal University of Rio de Janeiro Institutional Animal Care and Use Committee under the number 030/17. The research was conducted in compliance with the principles stated in the *Guide for the Care and Use of Laboratory Animals* (NIH).<sup>9</sup>

#### **4.2.2.3. Isolation of Bone Marrow Derived Macrophages (BMDM)**

BMDM were differentiated from bone marrow of BALB/C, C57BL/6 and knock out C57BL/6 mice using L929-cell conditioned medium (LCCM) as a source of macrophage colony-stimulating factor (M-CSF) as described by Zamboni *et al.*<sup>272</sup> Briefly, bone marrow was extracted from the femurs and tibias and re-suspended in bone marrow differentiated media (which is RPMI 1640 medium supplemented with 20% LCCM) in Petri dishes for 7 days at 37 °C with 5% CO<sub>2</sub>. After, the plates were washed with warm PBS to remove detached cells, the adherent BMDM were gently scraped off the surface and re-suspended in RPMI (without LCCM). These cells are ready to use in the assays described in section 4.2.3.

#### **4.2.2.4. Drugs**

Clemastine fumarate, amphotericin B and cycloheximide were purchased from Sigma-Aldrich. Glucantime solution (meglumine antimoniate, 300 mg mL<sup>-1</sup>) was a gift from Sanofi Aventis. Clemastine derivatives were synthesised using the procedure outline in the previous section. Stock solutions of clemastine and its derivatives (10 mM) were prepared in dimethyl sulfoxide (DMSO) and kept at 0 - 4° C. Subsequent dilutions were done in culture media. For *in vitro* assays, all drugs were serially diluted in 100% DMSO, and then diluted 1:100 in culture medium, so that all final drug concentrations contained 1% DMSO.

### 4.2.3. Assays

#### 4.2.3.1. Anti-promastigote assays

*L. major* promastigotes (FV1) WT, PX and  $\Delta$  LCB2 in Schneider's insect medium (100  $\mu$ L at  $1 \times 10^6$  mL<sup>-1</sup>) were incubated in 96-well plates with compounds in triplicate (amphotericin B and cycloheximide were used as positive controls, and untreated parasites with 1% DMSO as a negative control) at 26 °C for 48 h. Resazurin Solution (10  $\mu$ L) was then added and the plate incubated at 26 °C for 4 h prior to measurement using a fluorescence plate reader (555 - 585 nm). EC<sub>50</sub> values were calculated using sigmoidal regression analysis (GraphPad Prism).

Protocol 1: *L. amazonensis* promastigotes in Medium 199 (100  $\mu$ L at  $5 \times 10^5$  mL<sup>-1</sup>) were incubated in 96-well plates with compounds in triplicate (amphotericin B was used as a positive control, and untreated parasites with DMSO as a negative control) at 26 °C for 72 h. Resazurin Solution (10  $\mu$ L) was then added and the plate incubated at 26 °C for 4 h prior to measurement using a fluorescence plate reader (555 - 585 nm). EC<sub>50</sub> values were calculated using sigmoidal regression analysis (GraphPad Prism).

Protocol 2: Same procedure as above with the modification of a 48 h incubation time as opposed to 72 h and *Leishmania amazonensis* (MHOM/Br/75/JOSEFA) in Schneider's insect medium in the place of *Leishmania amazonensis* (MHOM/Br/75/JOSEFA) in Medium 199.

#### 4.2.3.2. Anti-amastigote intramacrophage assay

L929-cell conditioned medium (LCCM) as a source of macrophage colony-stimulating factor (M-CSF) as described by Zamboni *et al.*<sup>10</sup> BMDM were diluted in RPMI 1640 medium to a concentration of  $2 \times 10^5$  well<sup>-1</sup> in a 24-well plate with round cover slips and incubated for 24 h at 37 °C and 5% CO<sub>2</sub>. Bone marrow derived macrophages obtained as in 4.2.2.3. were diluted in RPMI 1640 medium to a concentration of  $2 \times 10^5$  well<sup>-1</sup> in a 24-well plate with round cover slips and incubated for 24 h at 37 °C and 5% CO<sub>2</sub>. They were infected with *L. amazonensis* promastigotes (10:1) at 37 °C for 4 h. Then washed with PBS twice to remove extracellular promastigotes and fresh RPMI medium supplemented with 5% FBS was added. After 24 h serial dilutions of the test compounds in RPMI medium (350  $\mu$ L) were added and the cells were incubated at 37 °C for 48 h. The adherent infected cells were then stained with Giemsa modified solution and amastigotes were counted using an optical Nikon® microscope.

#### 4.2.3.3. Macrophage cytotoxicity assay

Bone marrow derived macrophages in RPMI 1640 medium were seeded ( $1 \times 10^6$  mL<sup>-1</sup>, 100  $\mu$ L well<sup>-1</sup>) in 96-well plates and incubated for 24 h at 37 °C and 5% CO<sub>2</sub>. Following removal of media, serial dilutions of the test compounds in fresh RPMI medium (100  $\mu$ L) were added and the cells were incubated for 48 h at 37

°C and 5% CO<sub>2</sub>. Aliquots of resazurin solution (10 µL) were then added and the cells were incubated at 37 °C and 5% CO<sub>2</sub> for 4 h. Cell-viability measurement was carried out using a fluorescence plate reader.

#### 4.2.3.4. *In vivo* assay

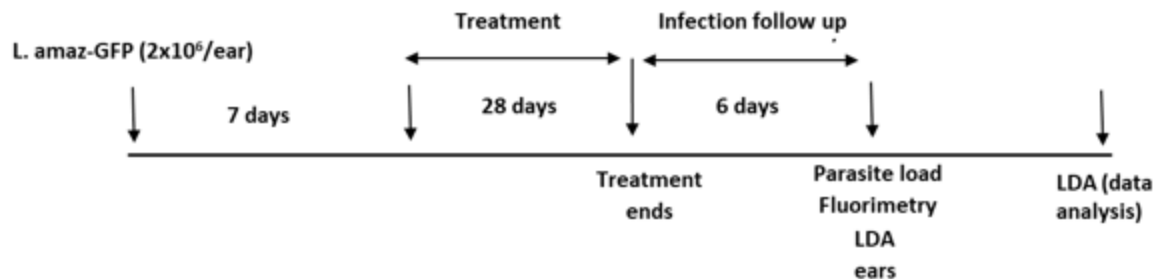

*In vivo* assays were conducted as previously reported<sup>1</sup>. Two month old BALB/c female mice, weighing 20 - 25 g and of approximately the same age were used for the study. For infection of mice, stationary phase GFP *L. amazonensis* promastigotes were collected, washed and suspended in sterile PBS. A volume of 10 µL of sterile PBS containing 2 x 10<sup>6</sup> parasites was injected into the right ear. On day seven of infection, animals were randomly distributed into 5 groups; oral clemastine fumarate (5 animals), IP clemastine fumarate (5 animals), IL clemastine fumarate (5 animals), IP glucantime solution (5 animals) and untreated (6 animals). Mice were treated with clemastine fumarate at a dose of 134 mg kg<sup>-1</sup> by oral gavage five times a week for 28 days. Mice were treated with clemastine fumarate and glucantime solution at a dose of 11.65 mg kg<sup>-1</sup> and 1.30 g kg<sup>-1</sup> respectively, by intraperitoneal injection twice a week for 28 days. Mice were treated with clemastine fumarate at a dose of 1.17 mg kg<sup>-1</sup> by intralesional injection twice a week for 28 days. Infected ear thicknesses were measured once or twice a week with a caliper gauge, and the lesion sizes were expressed as the difference between the thickness of infected and non-infected ear. On day 41 animals were sacrificed and the fluorescence measured (485 - 528 nm) and parasite load quantified using a limiting dilution assay (LDA).

Data on lesion progression were analysed for statistical significance by using the Dunnett test as part of the one-way ANOVA (GraphPad Prism 8 software). A result was considered significant at \* P ≤ 0.05, \*\* P ≤ 0.01, \*\*\* P ≤ 0.001, \*\*\*\* P ≤ 0.0001.

#### 4.2.3.5. High performance thin layer chromatography (HPTLC) based *Lmj*IPCS assay

The following protocol was adapted from a literature procedure and carried out under non-sterile conditions.<sup>11</sup>

Stock 1: Dry PI (1 mM, 30  $\mu$ L) in a LoBind Eppendorf tube using a vacuum concentrator. To the dried PI, phosphate buffer (71.4 mM , pH 7.0, 105  $\mu$ L), CHAPS (3 mM, 30  $\mu$ L) and NBD- C6-ceramide **80** (200  $\mu$ M, 1.7  $\mu$ L) was added. The solution was mixed by vortex and stored on ice.

Stock 2: Phosphate buffer (71.4 mM , pH 7.0, 105  $\mu$ L), CHAPS (3 mM, 30  $\mu$ L), storage buffer (6  $\mu$ L) and microsomal membranes (1.5  $\mu$ L) were combined in a LoBind Eppendorf tube.

Stock 2 (23.75  $\mu$ L) was added to n LoBind Eppendorf tubes (where n is the number of test compounds + controls), followed by the addition test compounds in DMSO (5 mM, 1  $\mu$ L). After pre-incubation at 30  $^{\circ}$ C for 20 min, the reaction was started by the addition of stock 1 (23.75  $\mu$ L) to each tube and incubation at 30  $^{\circ}$ C for 30 min. The reaction mixtures were quenched with  $\text{CHCl}_3$ :MeOH:H<sub>2</sub>O (10:10:3, 150  $\mu$ L).

The mixtures were centrifuged to separate phases, the organic layer was removed and dried using a vacuum concentrator. The residue was re-suspended in  $\text{CHCl}_3$ :MeOH:H<sub>2</sub>O (10:10:3, 20  $\mu$ L) and loaded (3 x 3  $\mu$ L ) onto HPTLC plates (silica gel 60 F254). This was run using the solvent system  $\text{CHCl}_3$ :MeOH:0.25% KCl(aq) (55:45:10) and the *R<sub>f</sub>* values for the excess NBD-C6-ceramide **80** and the product NBD-C6-IPC **81** were 0.96 and 0.57 respectively. Product quantification was carried out using a fluorescence plate reader (Ex473/Em520).

#### **4.2.3.6. Radioligand Binding Assay (Supplemental Figure S3)**

These assays were run by Eurofins under contract to LifeArc FR095-0011887. A representative protocol describing the human histamine H2 receptor (antagonist radioligand) assay is shown below.<sup>12</sup>

Cell membrane homogenates (24  $\mu$ g protein) are incubated for 120 min at 22 $^{\circ}$ C with 0.075 nM [<sup>125</sup>I]APT in the absence or presence of the test compound in a buffer containing 50 mM Na<sub>2</sub>HPO<sub>4</sub>/KH<sub>2</sub>PO<sub>4</sub> (pH 7.4) and 0.05% BSA. Nonspecific binding is determined in the presence of 100  $\mu$ M tiotidine. Following incubation, the samples are filtered rapidly under vacuum through glass fiber filters (GF/B, Packard) presoaked with 0.3% PEI and rinsed several times with ice-cold 50 mM Tris-HCl buffer using a 96-sample cell harvester (Unifilter, Packard). The filters are dried then counted for radioactivity in a scintillation counter (Topcount, Packard) using a scintillation cocktail (Microscint 0, Packard). The results are expressed as a percent inhibition of the control radioligand specific binding. The standard reference compound is cimetidine, which is tested in each experiment at several concentrations to obtain a competition curve from which its IC<sub>50</sub> is calculated.

## 5. References

1. J. G. M. Mina, R. L. Charlton, E. Alpizar-Sosa, D. O. Escrivani, C. Brown, A. Alqaisi, M. P. G. Borsodi, C. P. Figueiredo, E. V. de Lima, E. A. Dickie, W. B. Wei, R. Coutinho-Silva, A. Merritt, T. K. Smith, M. P. Barrett, B. Rossi-Bergmann, P. W. Denny and P. G. Steel, *ACS Infectious Diseases*, 2021, **7**, 47-63.
2. Y. X. Yang, Y. Liu, L. Zhang, Y. E. Jia, P. Wang, F. F. Zhuo, X. T. An and C. S. Da, *J. Org. Chem.*, 2014, **79**, 10696-10702.
3. A. M. Fournier, R. A. Brown, W. Farnaby, H. Miyatake-Ondozabal and J. Clayden, *Org. Lett.*, 2010, **12**, 2222-2225.
4. V. Terrasson, S. Marque, M. Georgy, J. M. Campagne and D. Prim, *Adv. Synth. Catal.*, 2006, **348**, 2063-2067.
5. A. G. M. Barrett, B. T. Hopkins, A. C. Love and L. Tedeschi, *Org. Lett.*, 2004, **6**, 835-837.
6. E. J. Trybulski, R. H. Kramss, R. M. Mangano and A. Rusinko, *J. Med. Chem.*, 1990, **33**, 3190-3198.
7. R. Csuk, A. Barthel and D. Ströhl, *Zeitschrift Fur Naturforschung Section B-a Journal of Chemical Sciences*, 2011, **66**, 95-97.
8. K. M. Darwish, I. Salama, S. Mostafa, M. S. Gomaa, E. S. Khafagy and M. A. Helal, *Bioorg. Med. Chem. Lett.*, 2018, **28**, 1595-1602.
9. National Research Council (US) Committee for the Update of the Guide for the Care and Use of Laboratory Animals, *Guide for the Care and Use of Laboratory Animals*, National Academies Press (US), Washington (DC), 8th Ed edn., 2011.
10. F. M. Marim, T. N. Silveira, D. S. Lima and D. S. Zamboni, *PLoS One*, 2010, **5**, 0015263.
11. J. G. Mina, J. A. Mosely, H. Z. Ali, H. Shams-Eldin, R. T. Schwarz, P. G. Steel and P. W. Denny, *Int. J. Biochem. Cell Biol.*, 2010, **42**, 1553-1561.
12. R. Leurs, M. J. Smit, W. Menge and H. Timmerman, *Br. J. Pharmacol.*, 1994, **112**, 847.

## 6. $^1\text{H}$ and $^{13}\text{C}$ NMR Spectra

$^1\text{H}$  and  $^{13}\text{C}$  NMR Spectra for **7**

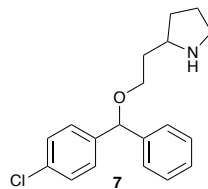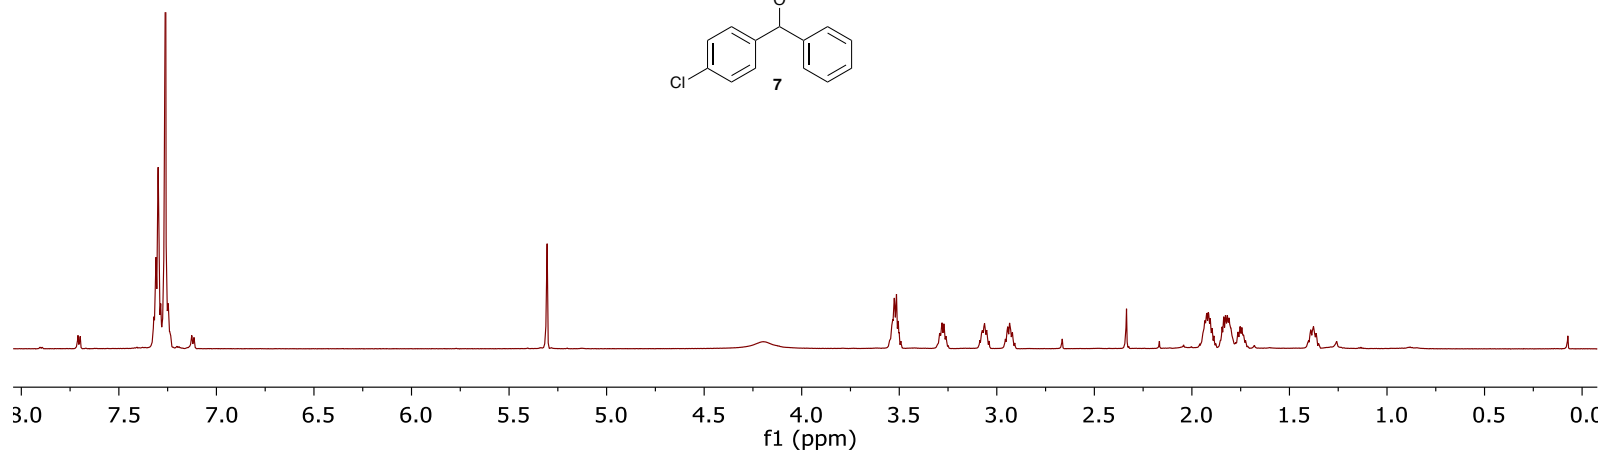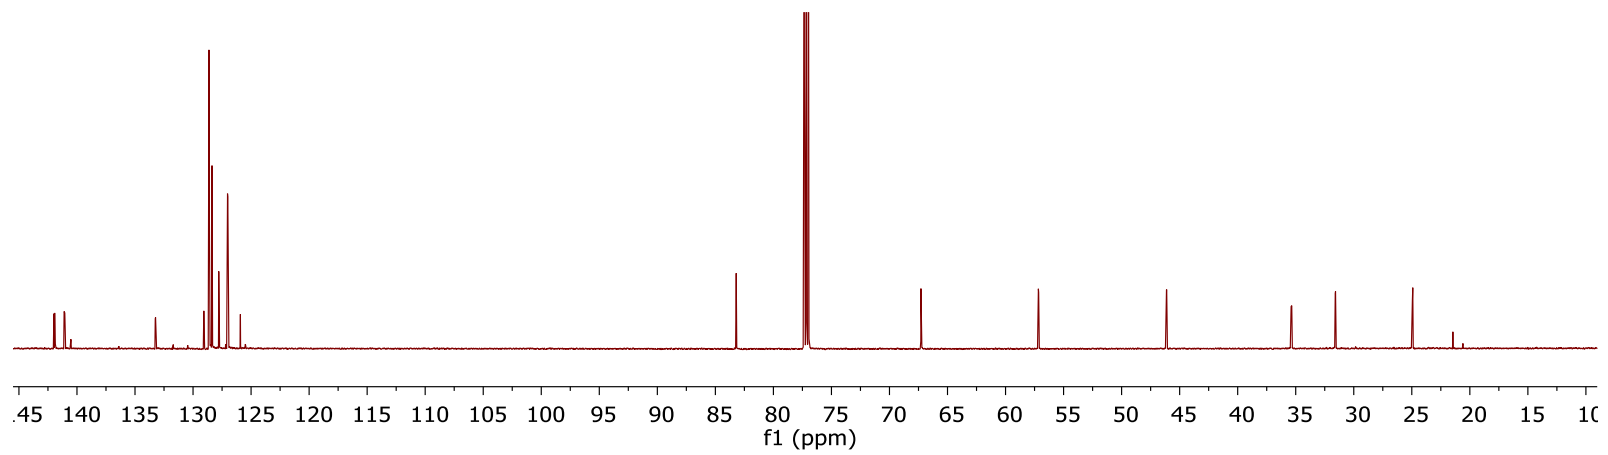

$^1\text{H}$  and  $^{13}\text{C}$  NMR Spectra for **9**

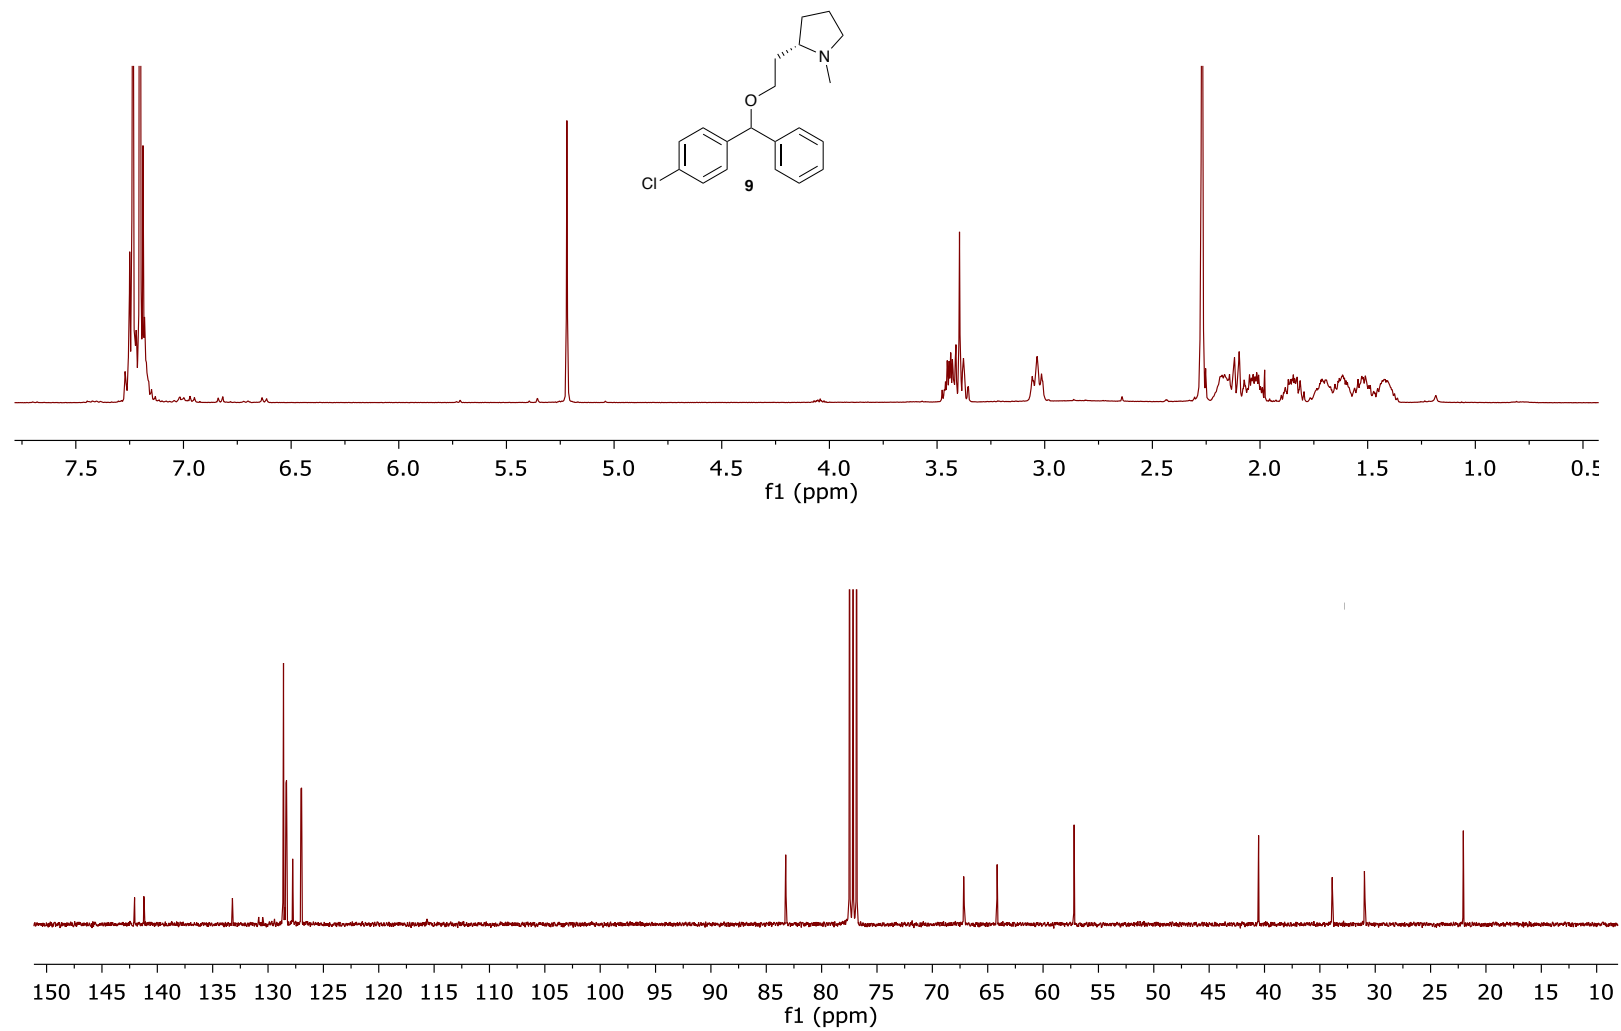



$^1\text{H}$  and  $^{13}\text{C}$  NMR Spectra for **10**

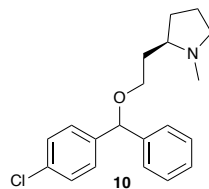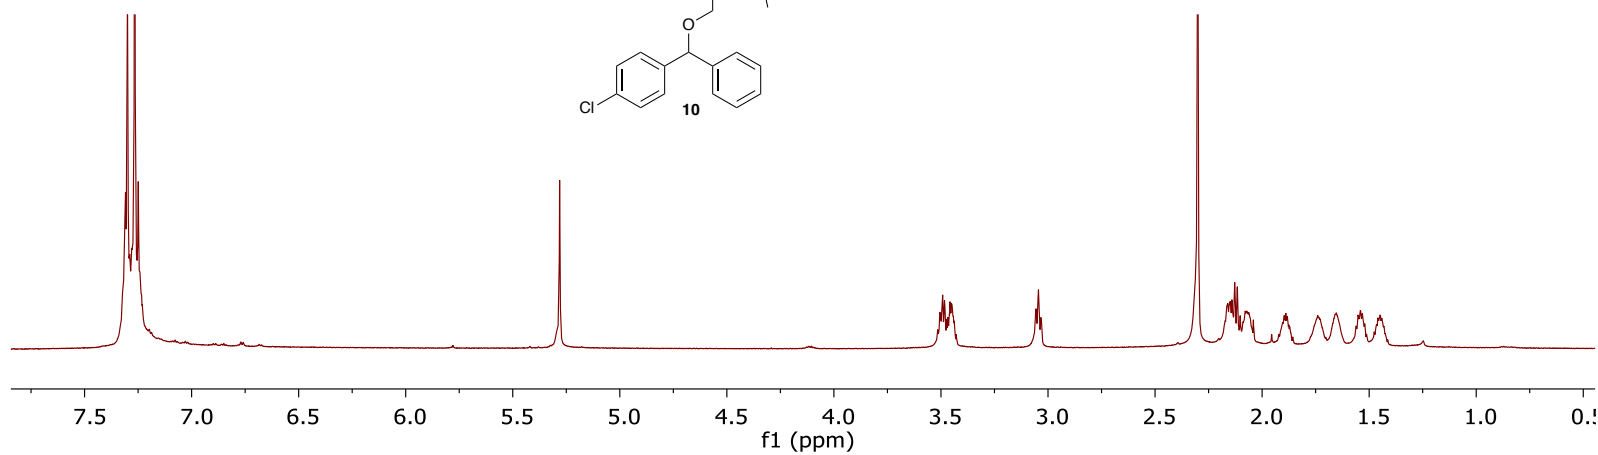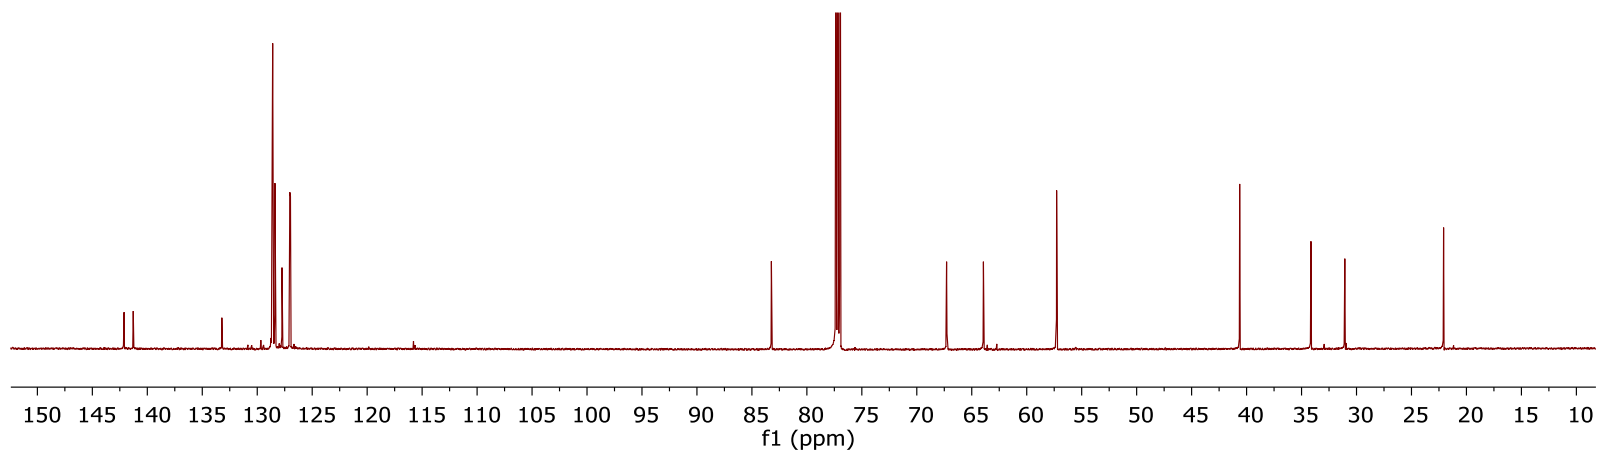

$^1\text{H}$  and  $^{13}\text{C}$  NMR Spectra for **14b**

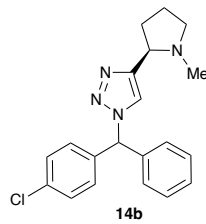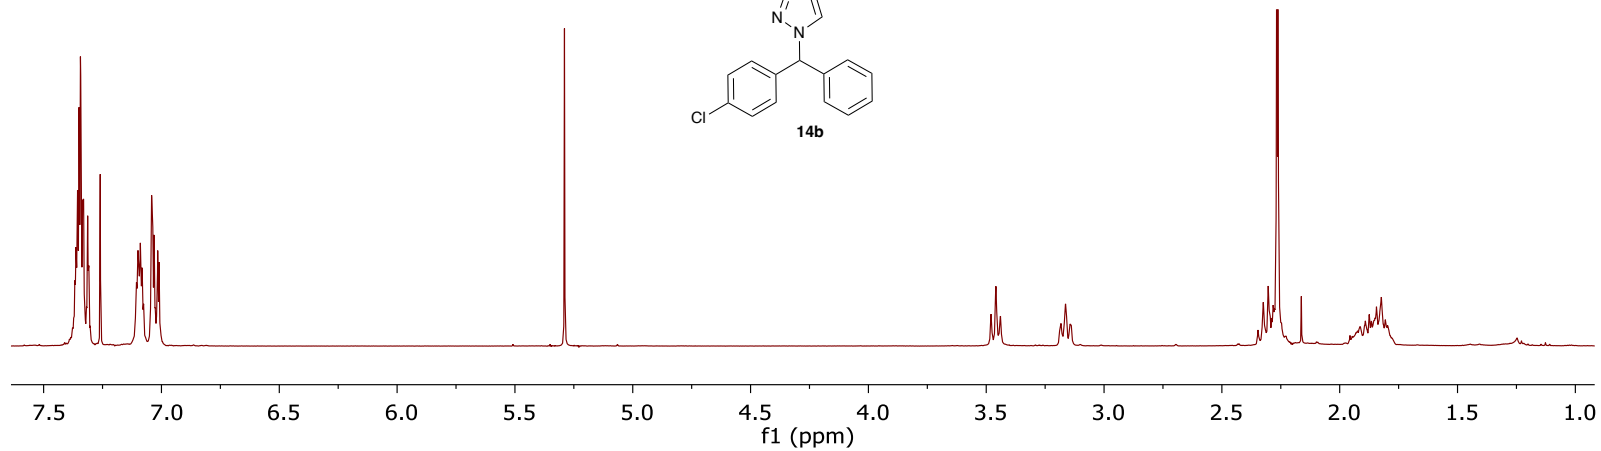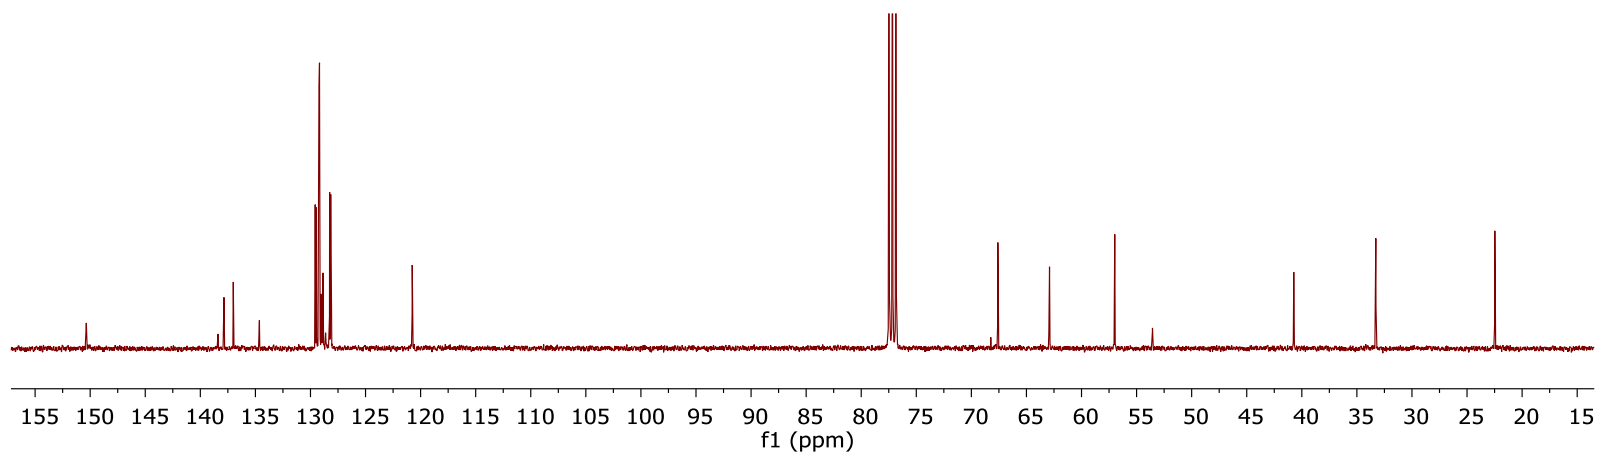

$^1\text{H}$  and  $^{13}\text{C}$  NMR Spectra for **14a**

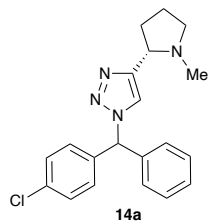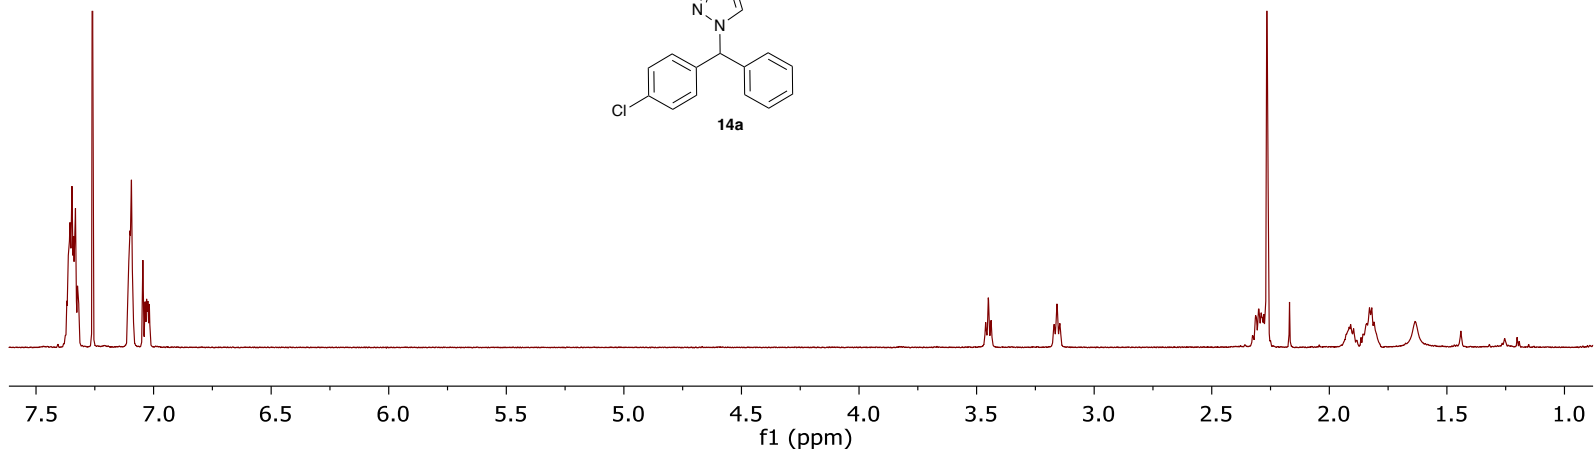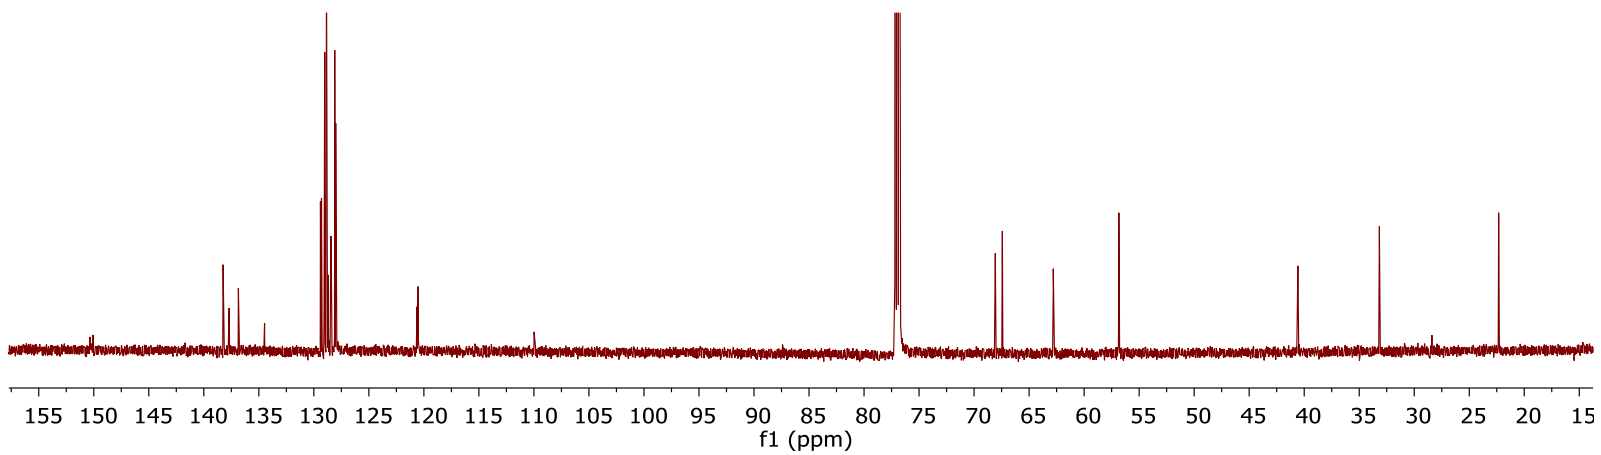

$^1\text{H}$  and  $^{13}\text{C}$  NMR Spectra for **19**

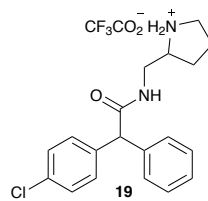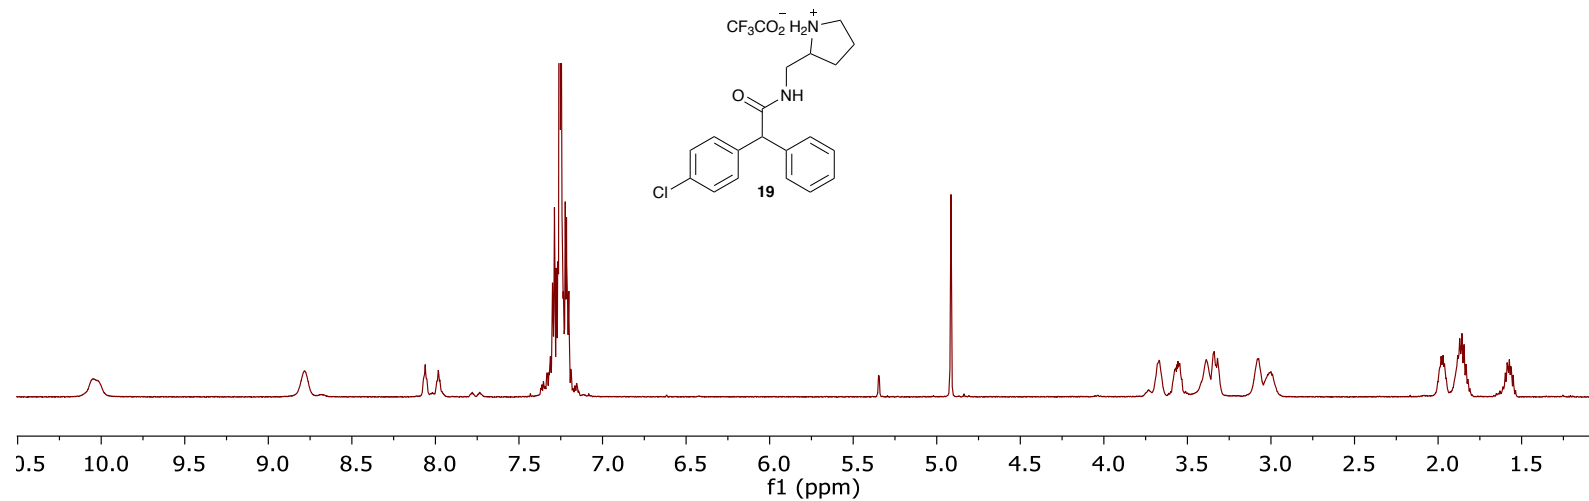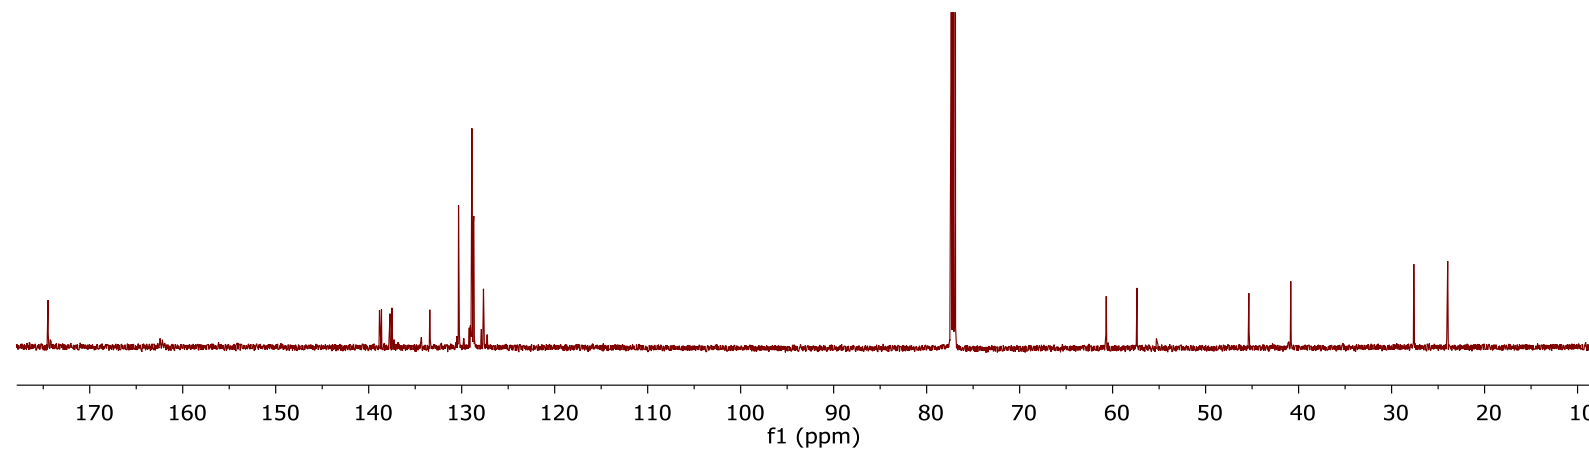

<sup>1</sup>H and <sup>13</sup>C NMR Spectra for **21**

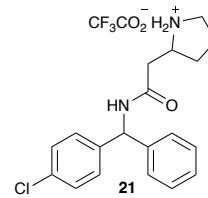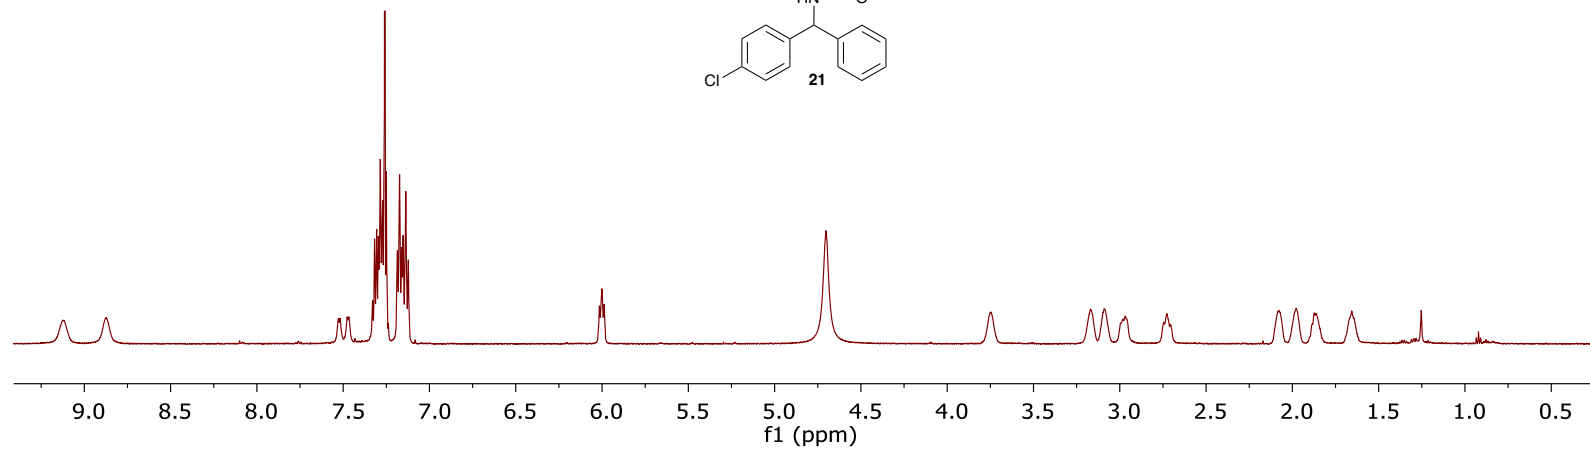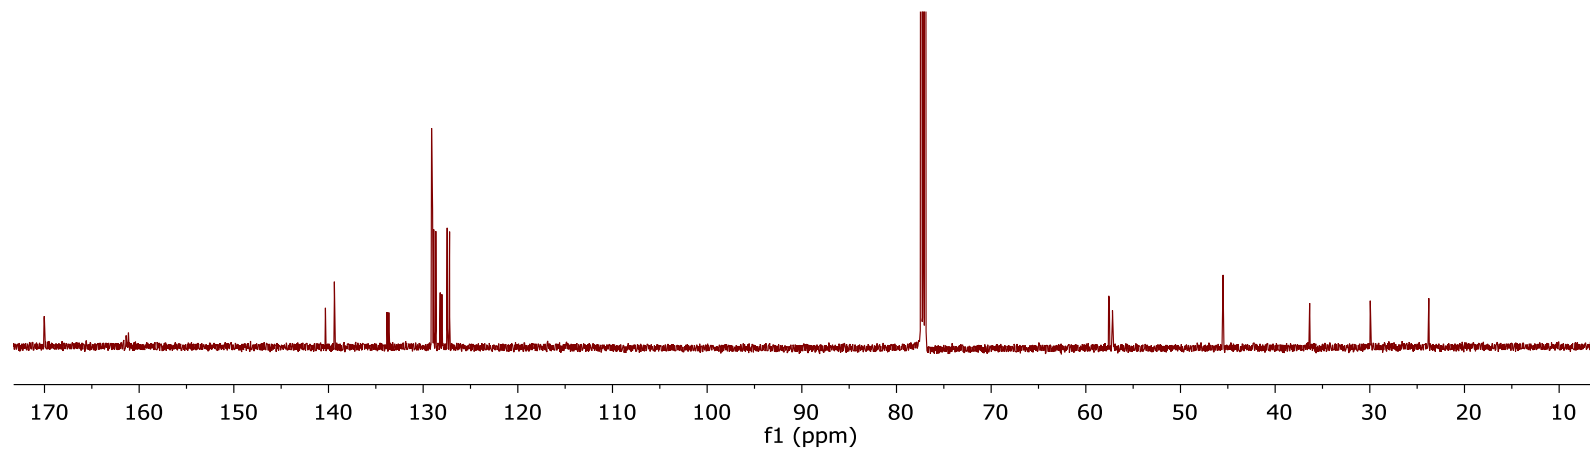

$^1\text{H}$  and  $^{13}\text{C}$  NMR Spectra for **24**

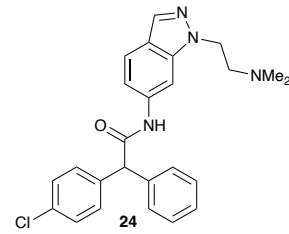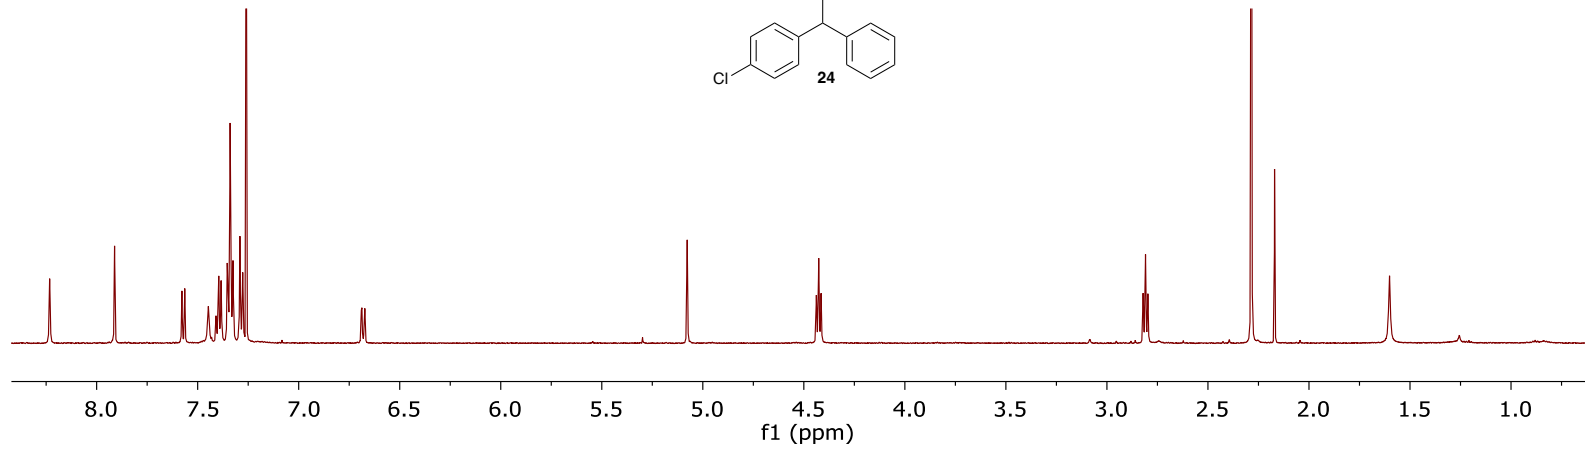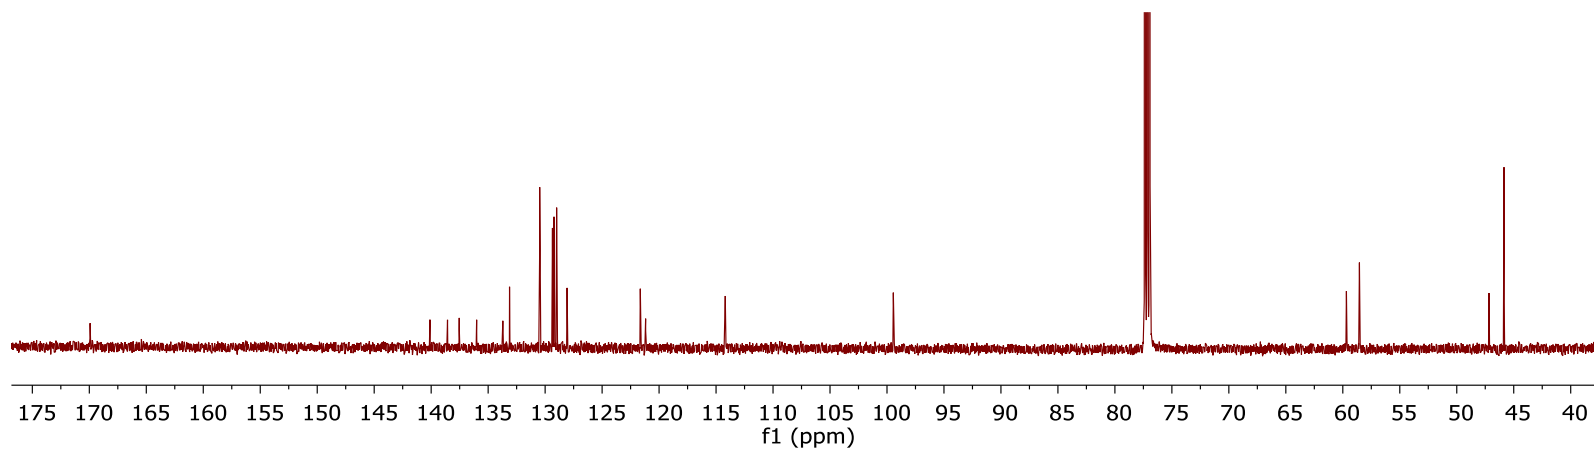

$^1\text{H}$  and  $^{13}\text{C}$  NMR Spectra for **27**

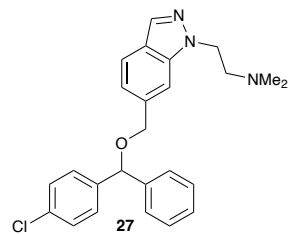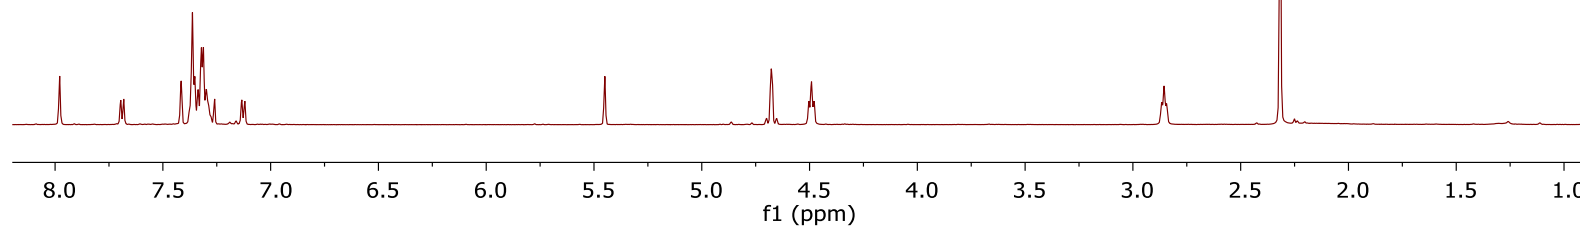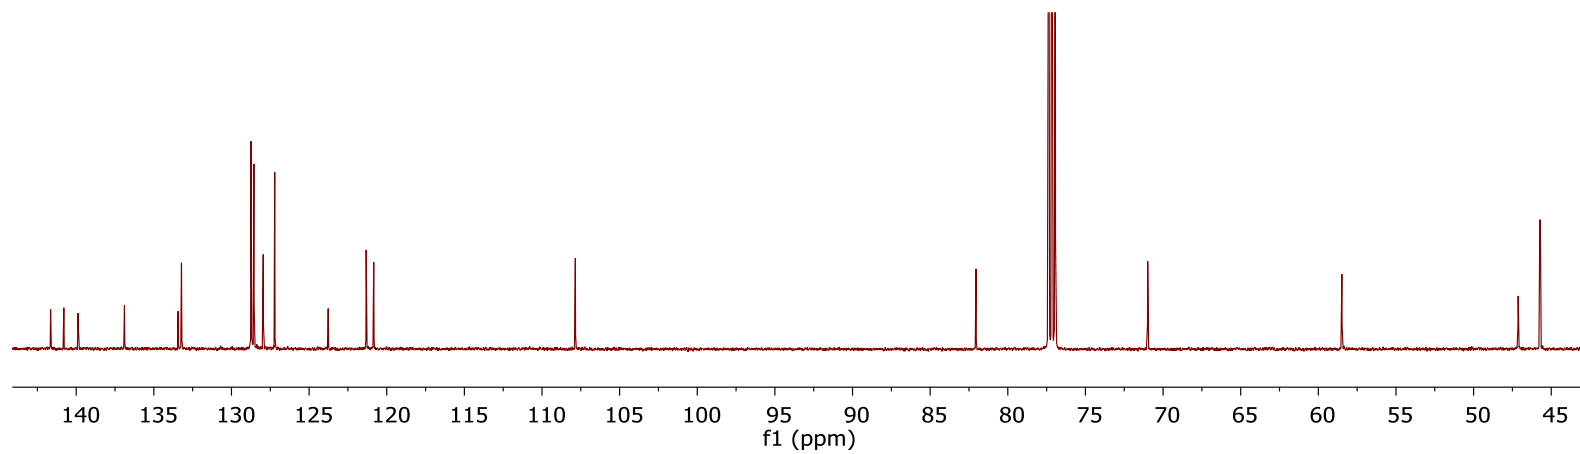

# $^1\text{H}$ and $^{13}\text{C}$ NMR Spectra for **28**

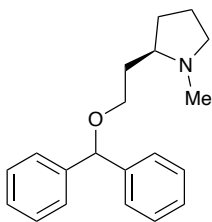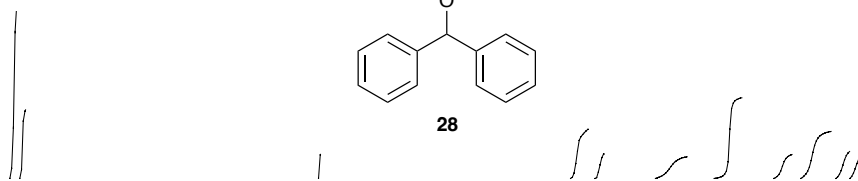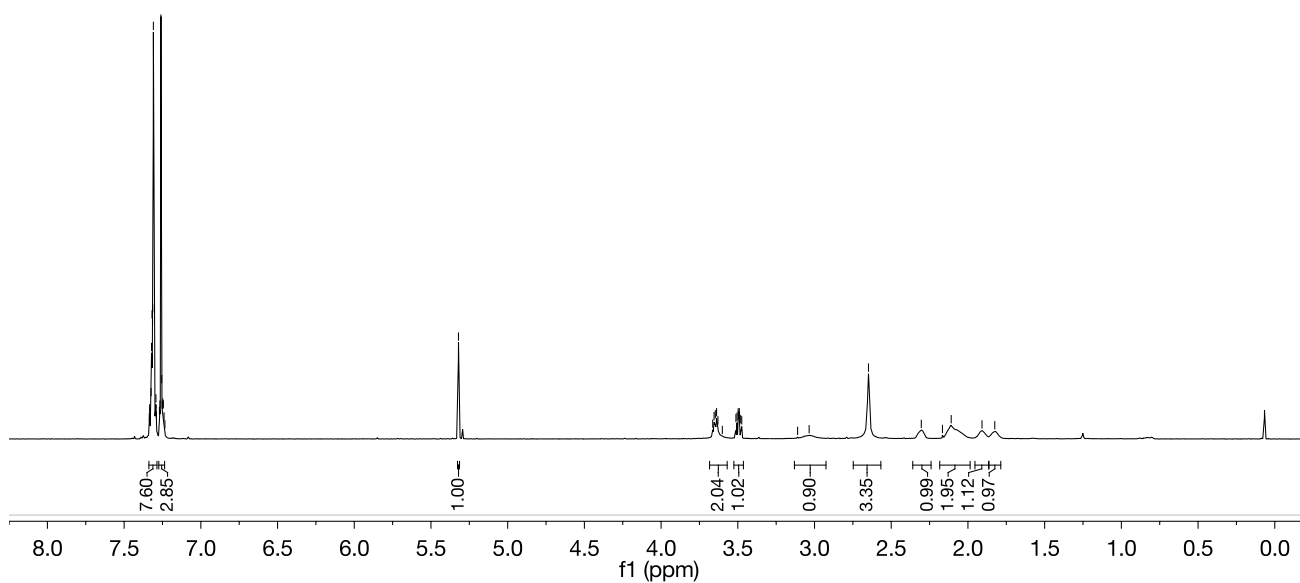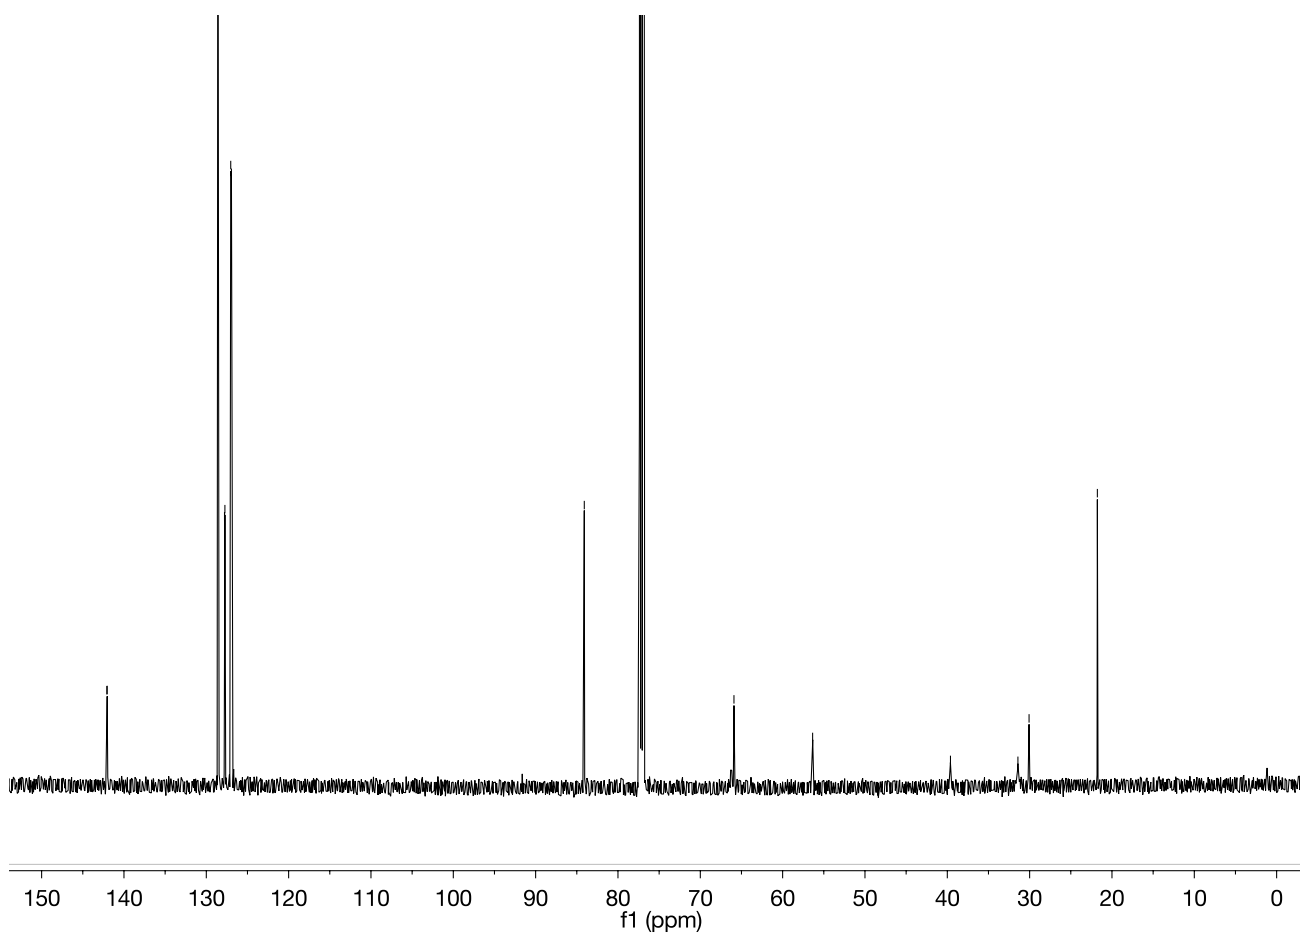



<sup>1</sup>H and <sup>13</sup>C NMR Spectra for **29**

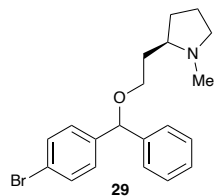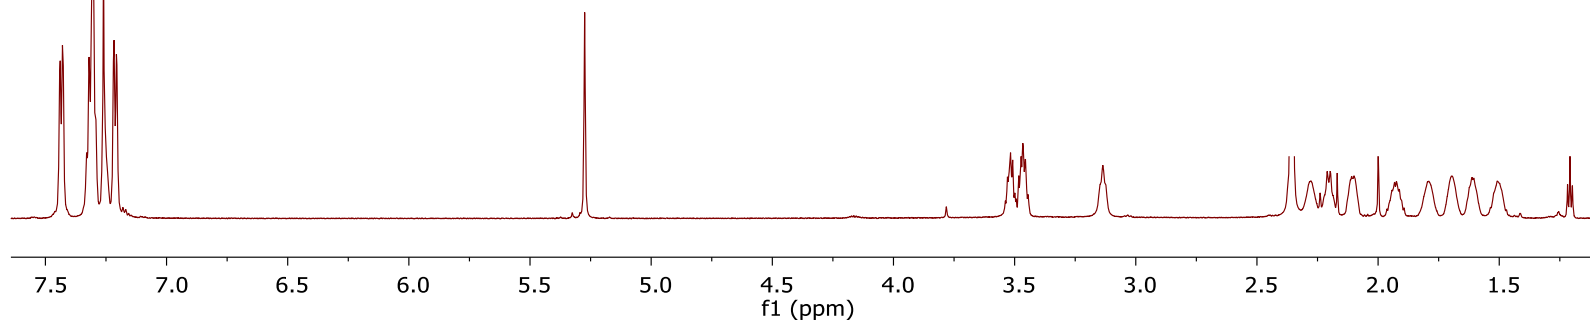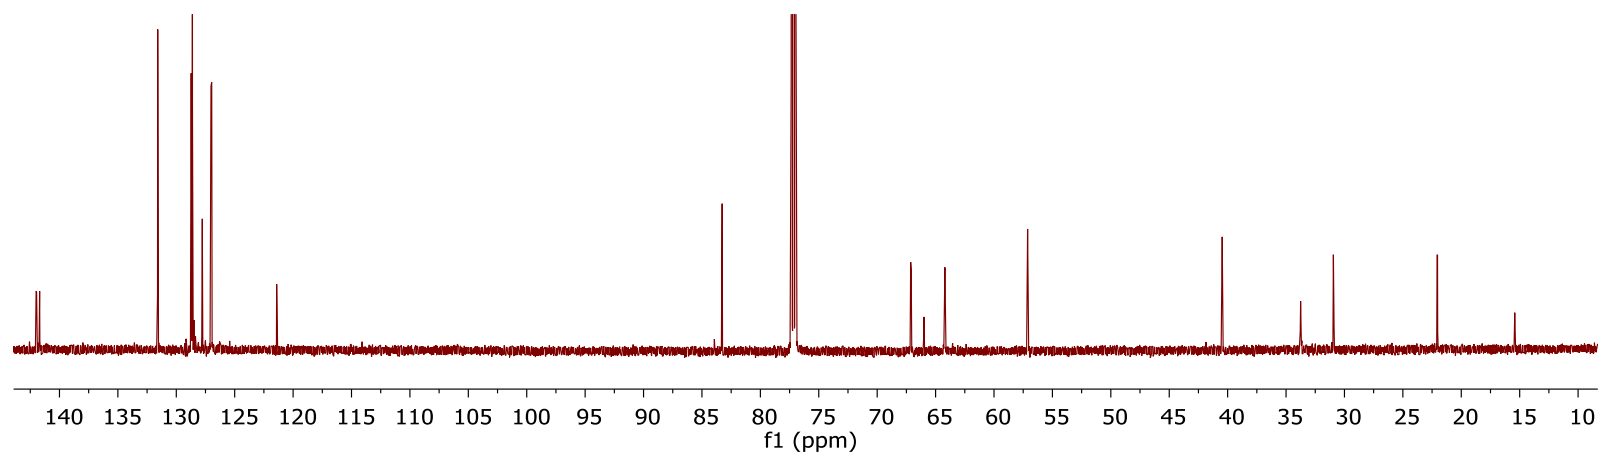

Note: Residual ether peaks observable at  $\delta_{\text{H}} = 1.21$  ppm;  $\delta_{\text{C}} = 66.0$  and  $15.4$  ppm

# $^1\text{H}$ and $^{13}\text{C}$ NMR Spectra for **30**

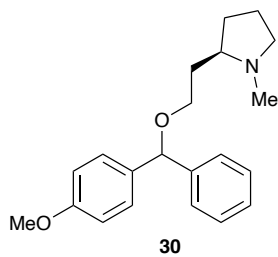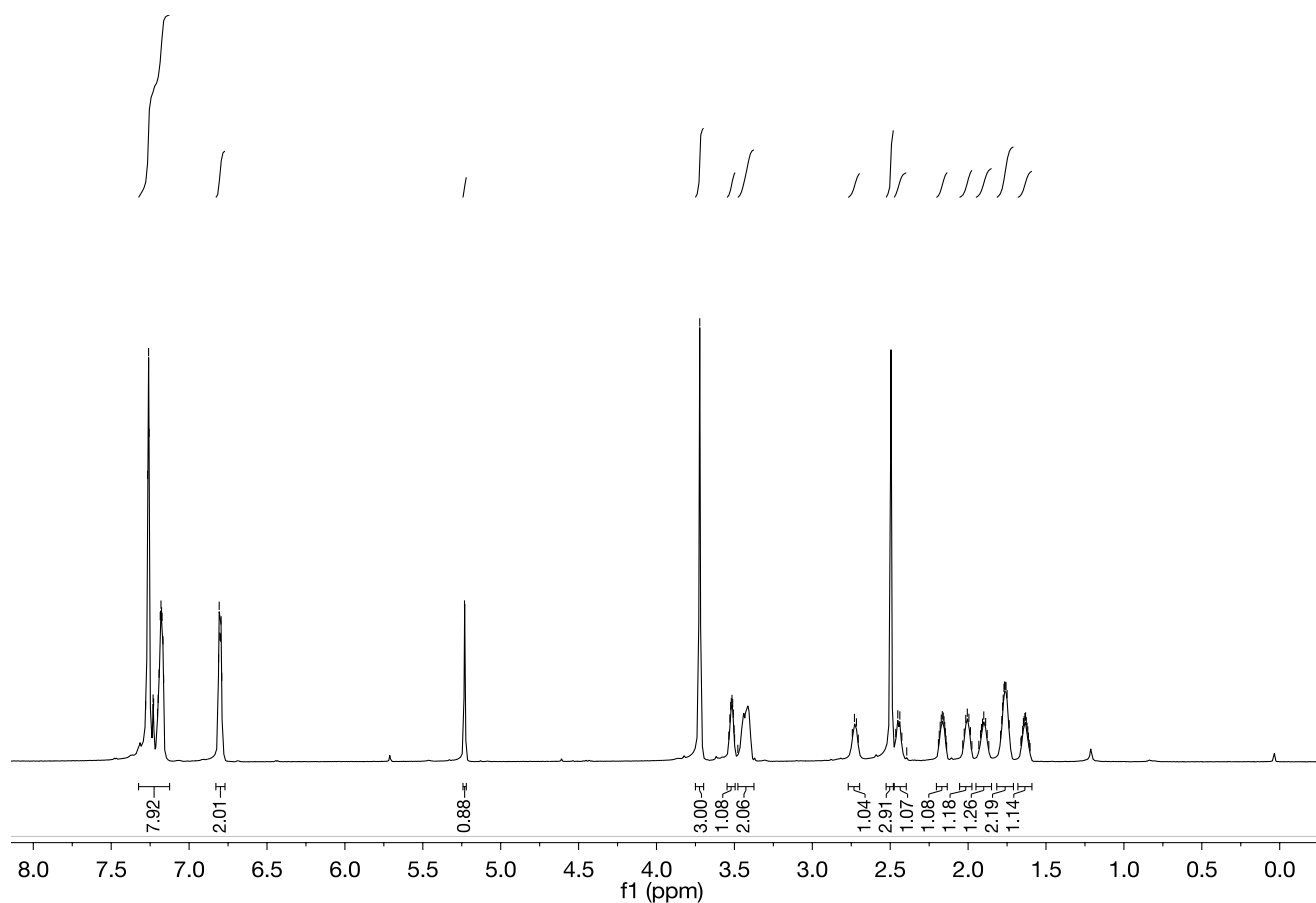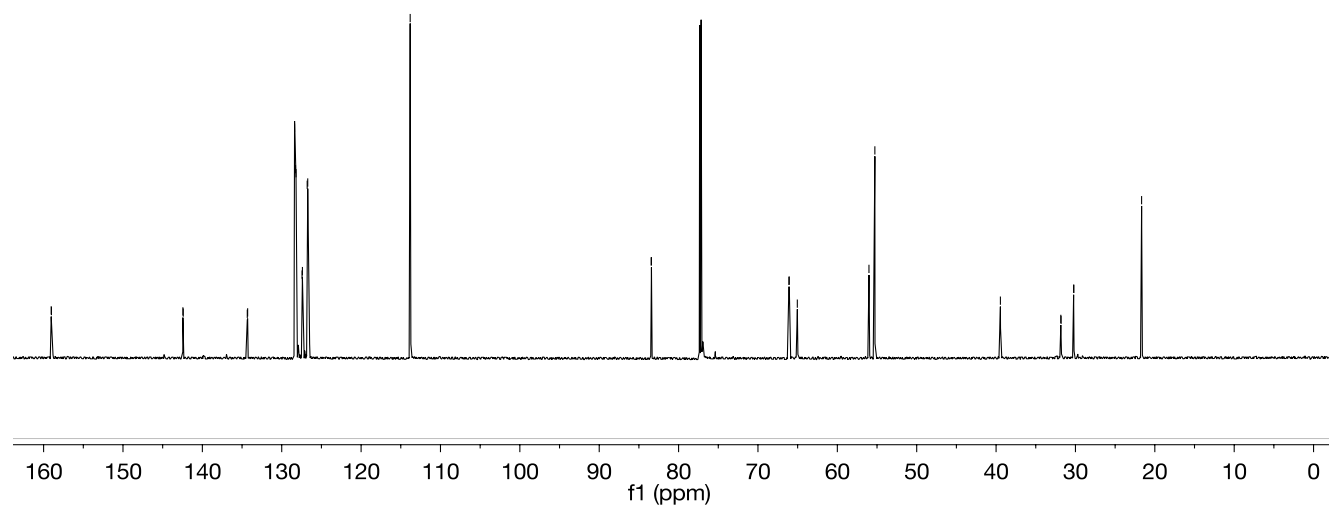

# $^1\text{H}$ and $^{13}\text{C}$ NMR Spectra for **31**

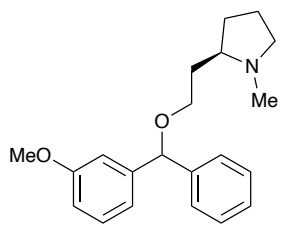

**31**

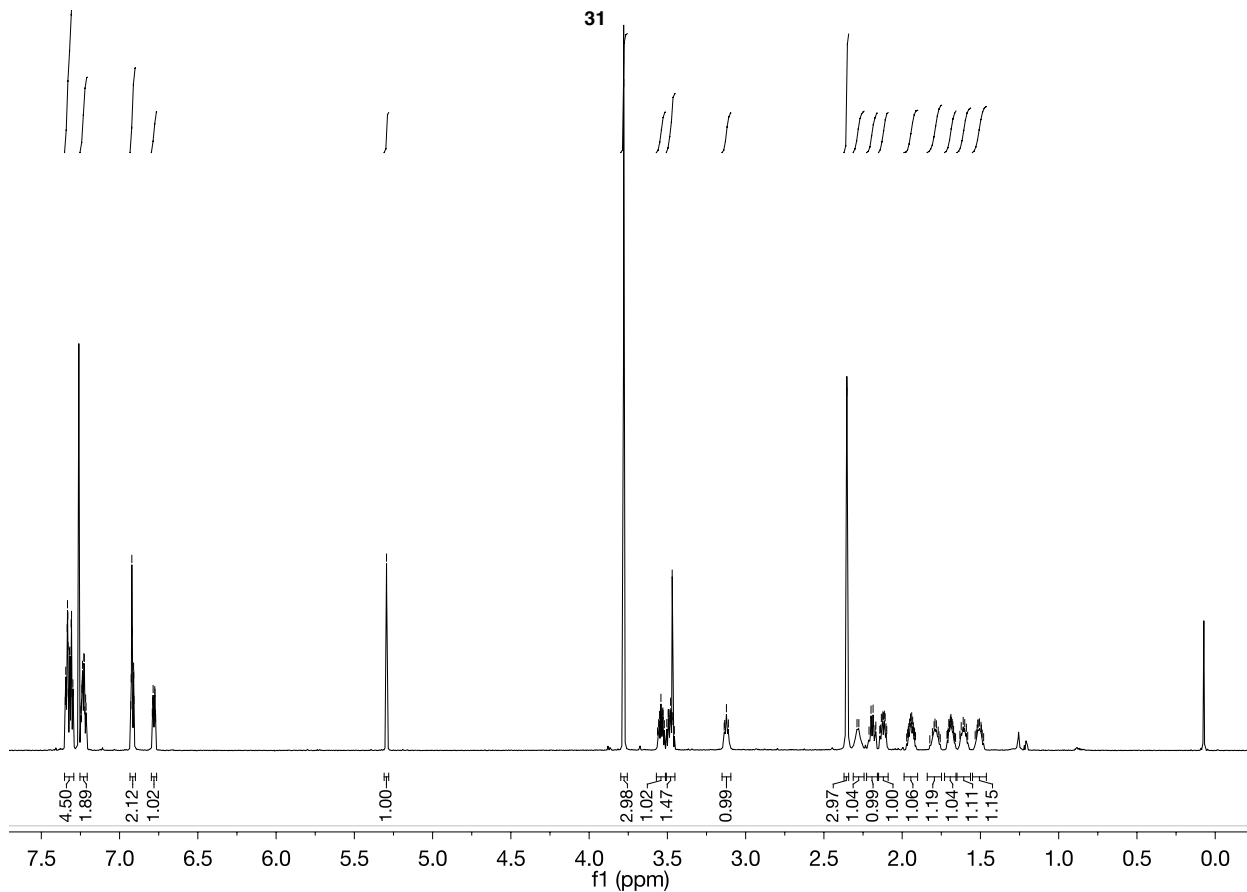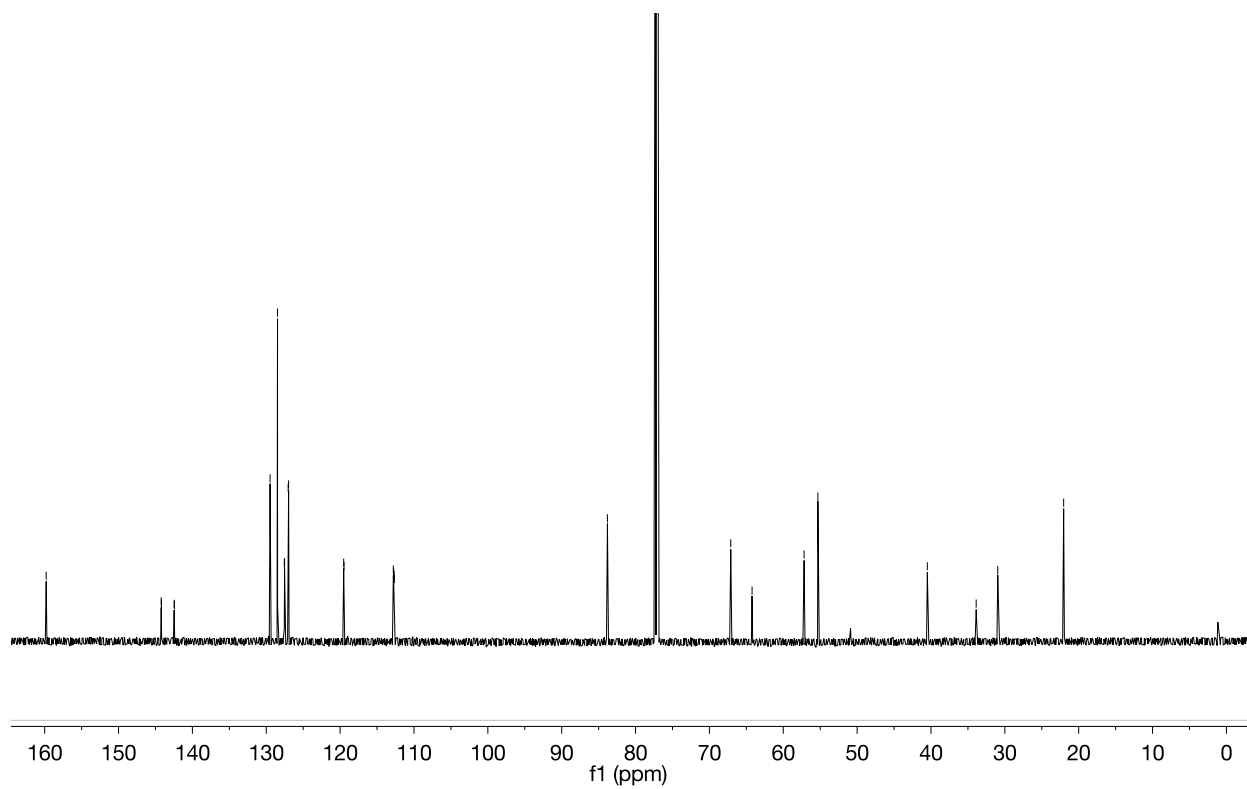

# $^1\text{H}$ and $^{13}\text{C}$ NMR Spectra for **32**

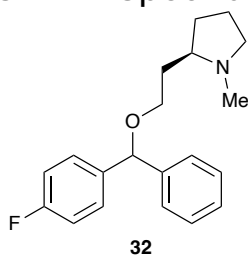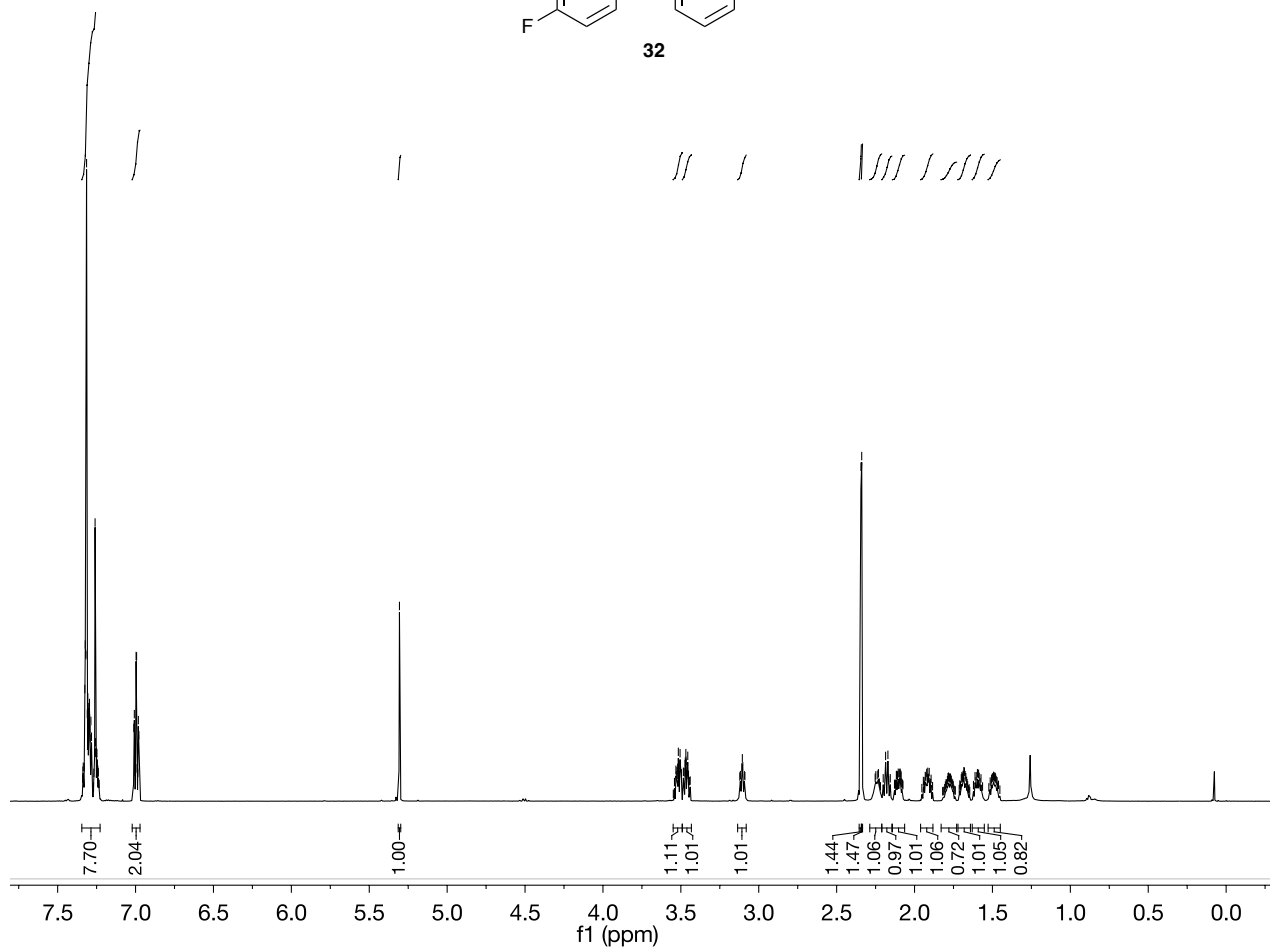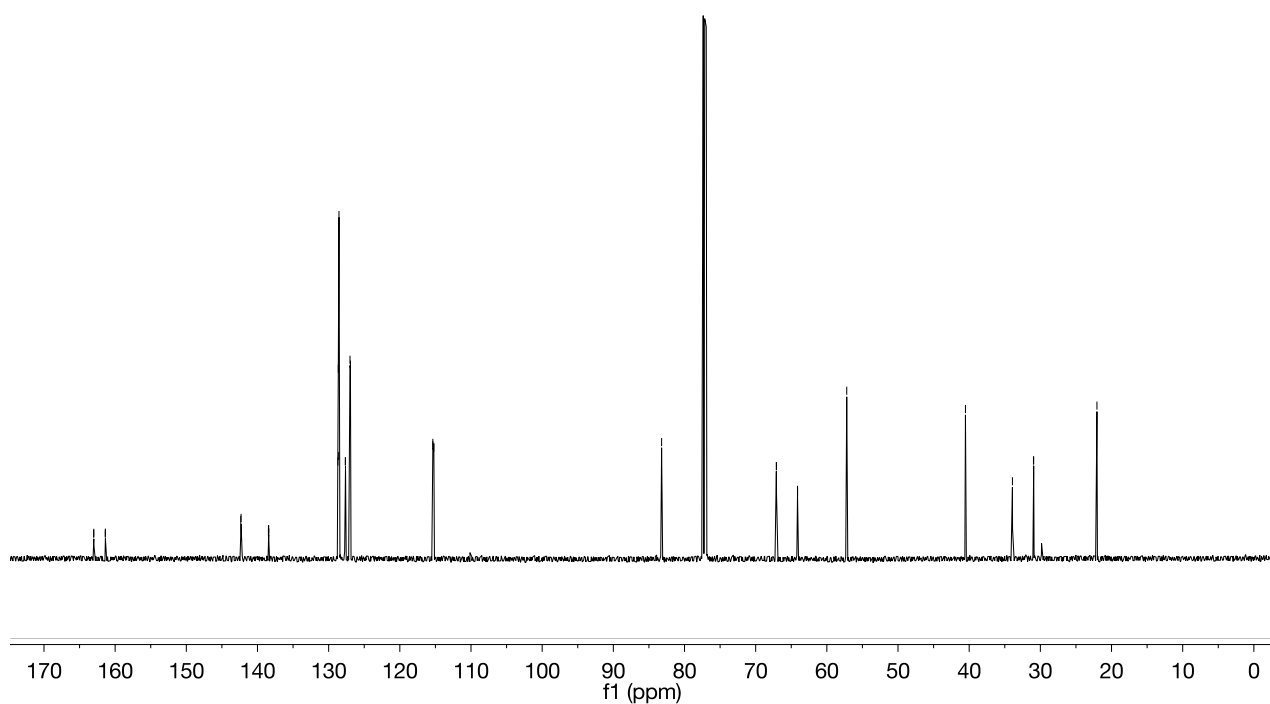

# $^1\text{H}$ and $^{13}\text{C}$ NMR Spectra for **33**

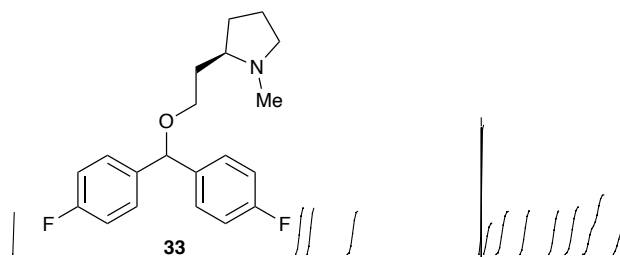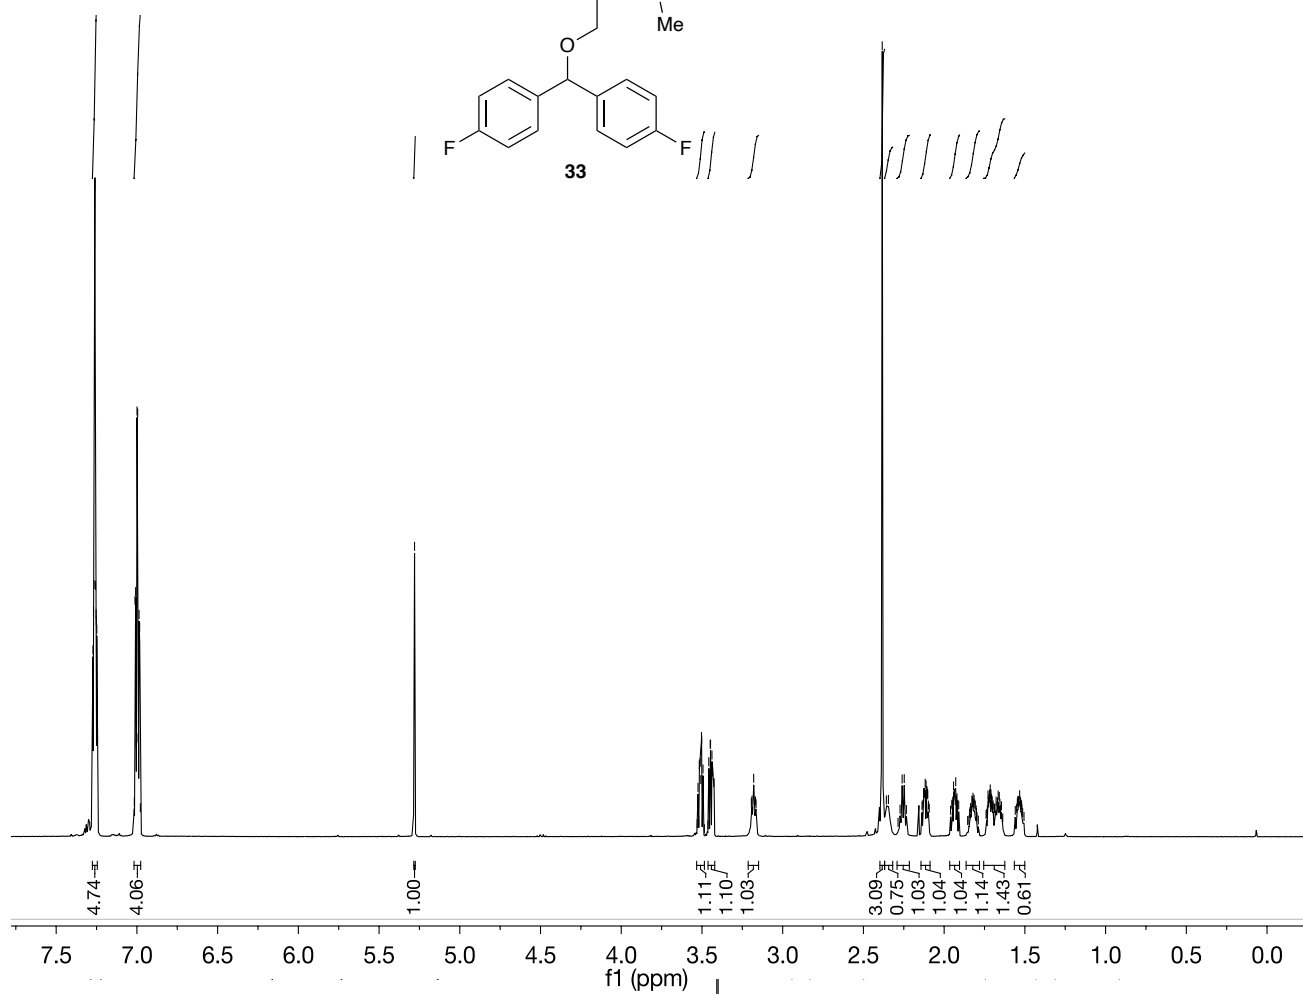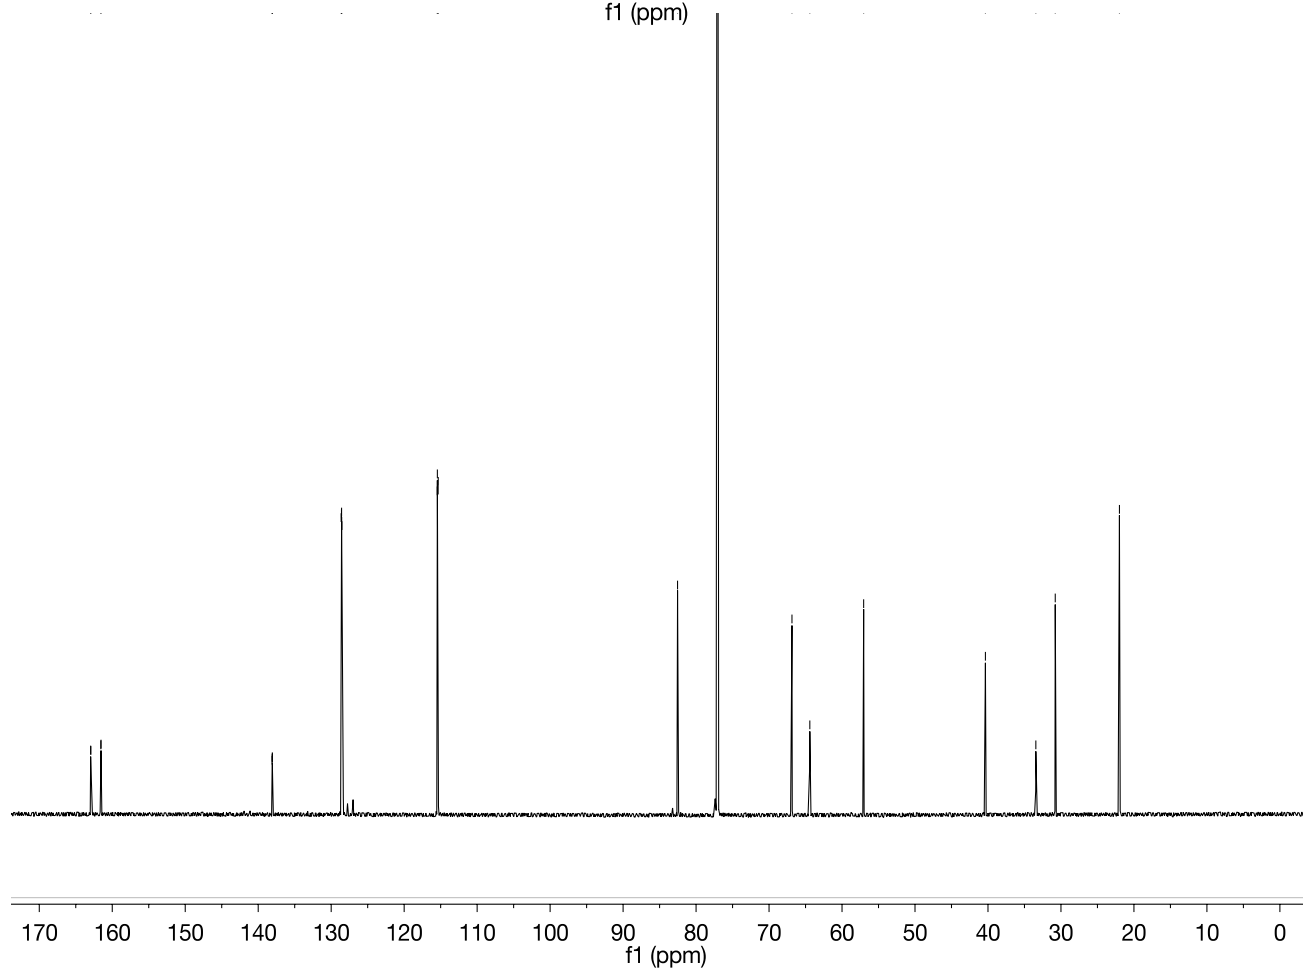

# $^1\text{H}$ and $^{13}\text{C}$ NMR Spectra for **35**

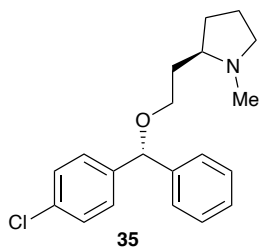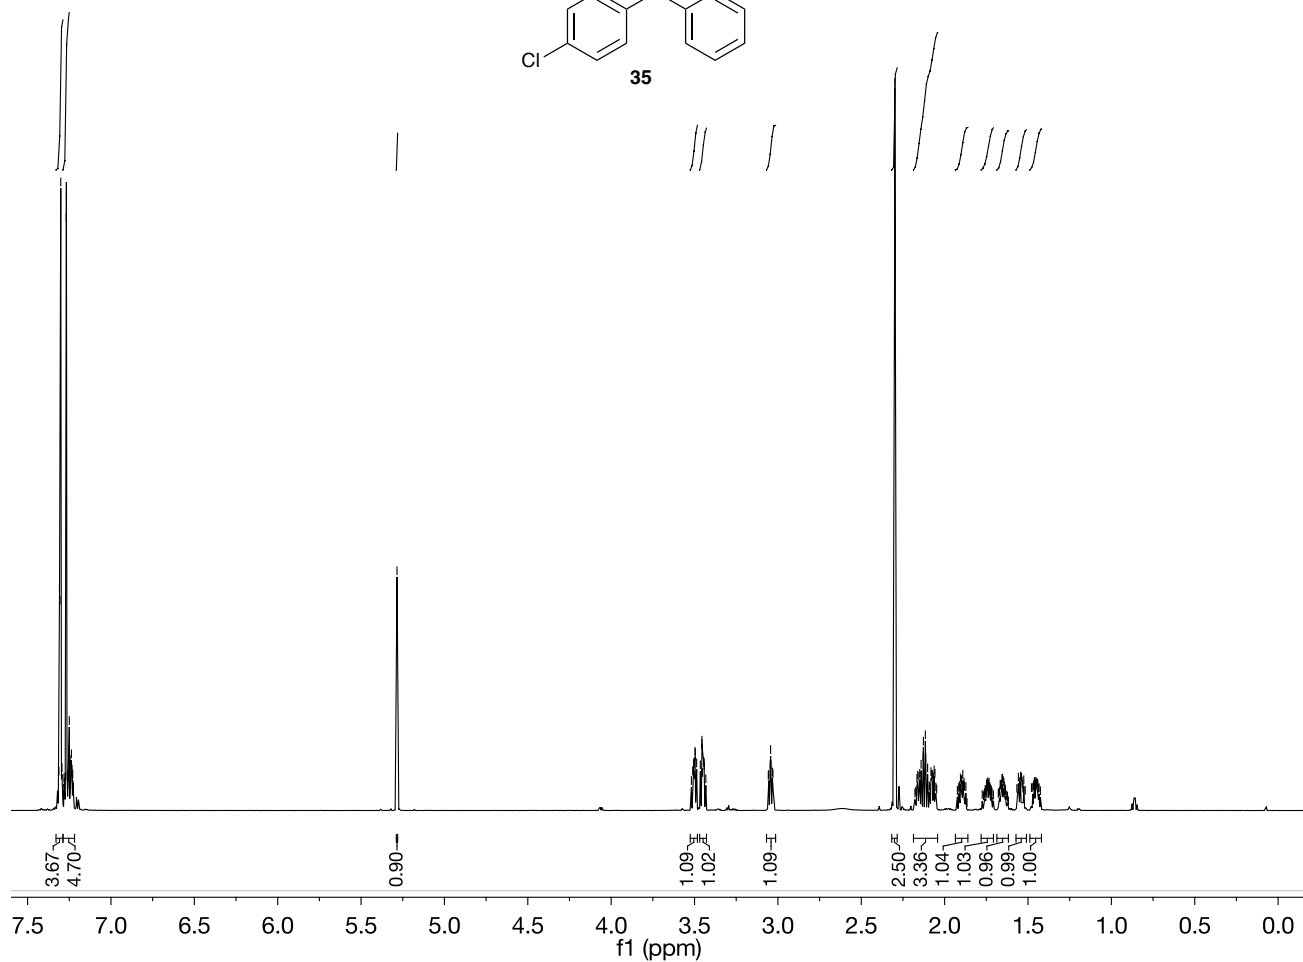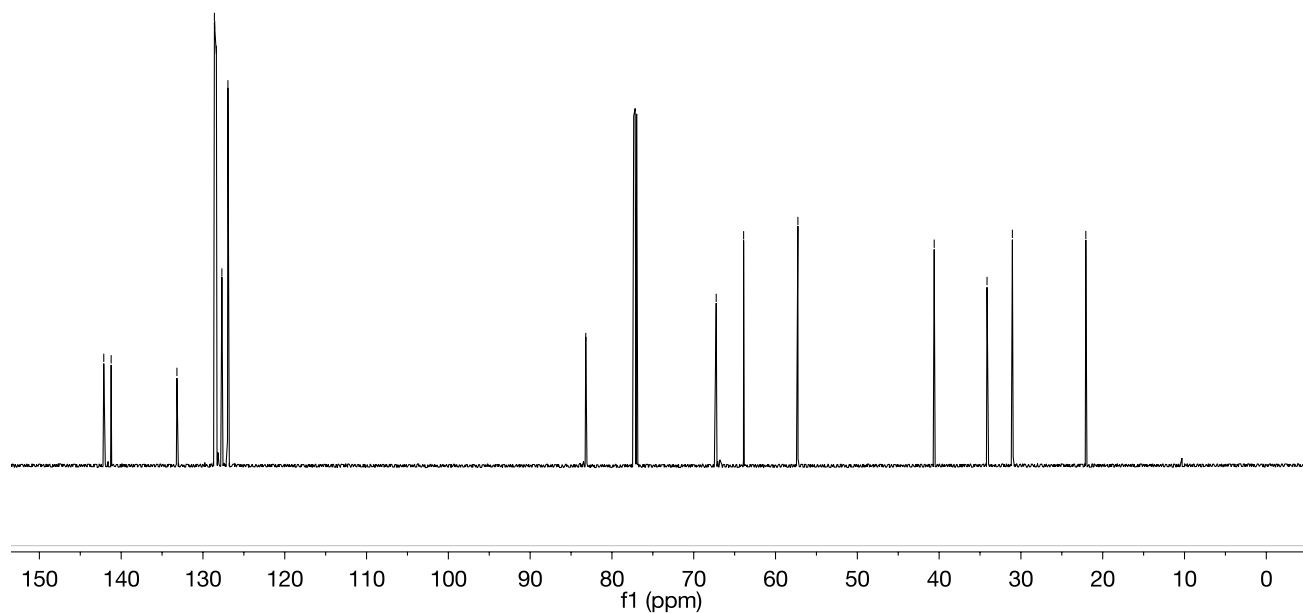

# $^1\text{H}$ and $^{13}\text{C}$ NMR Spectra for **36**

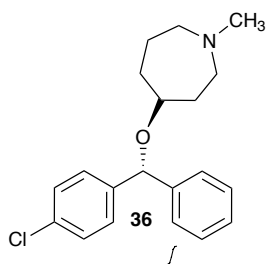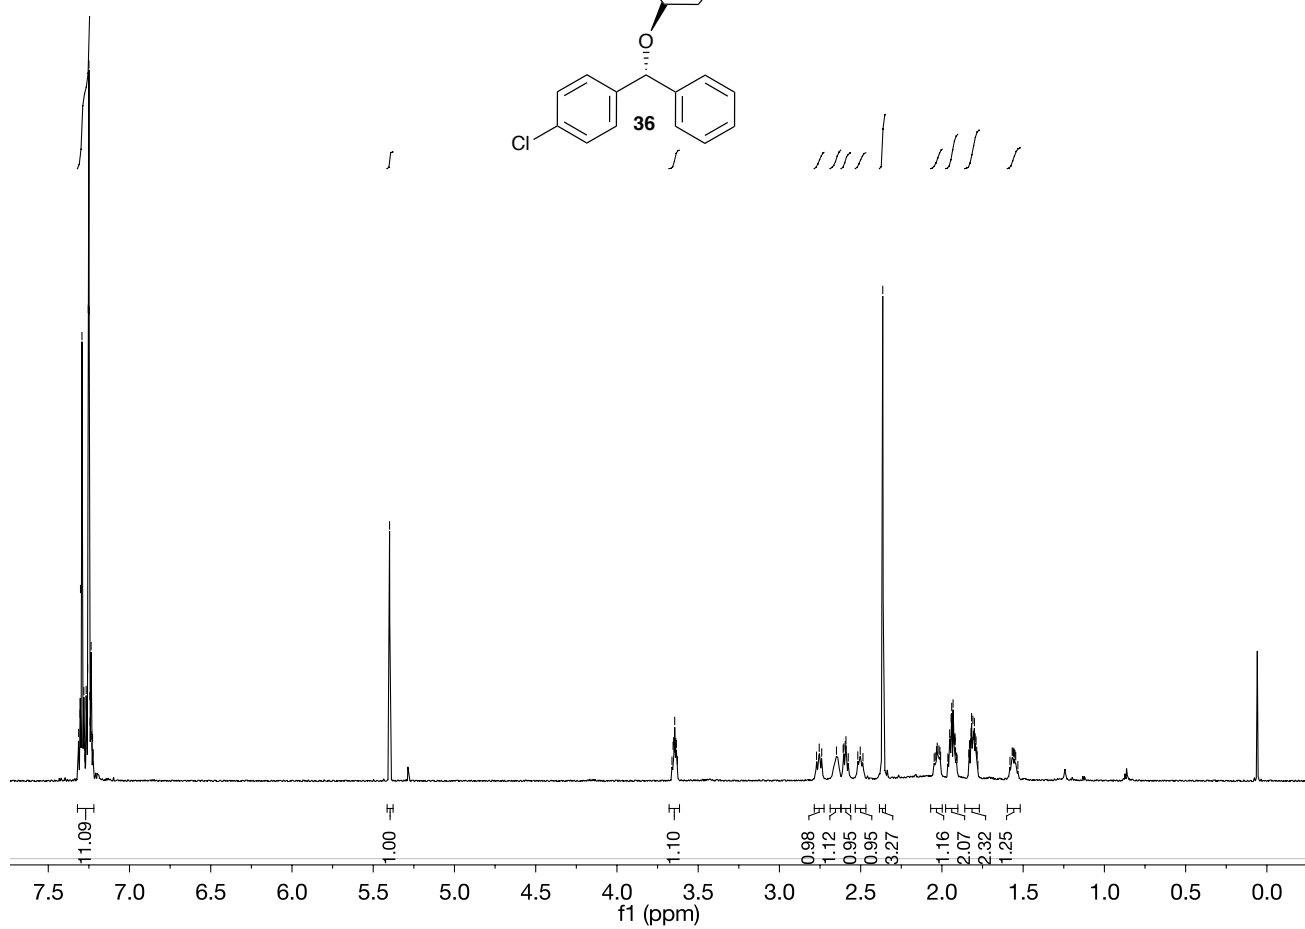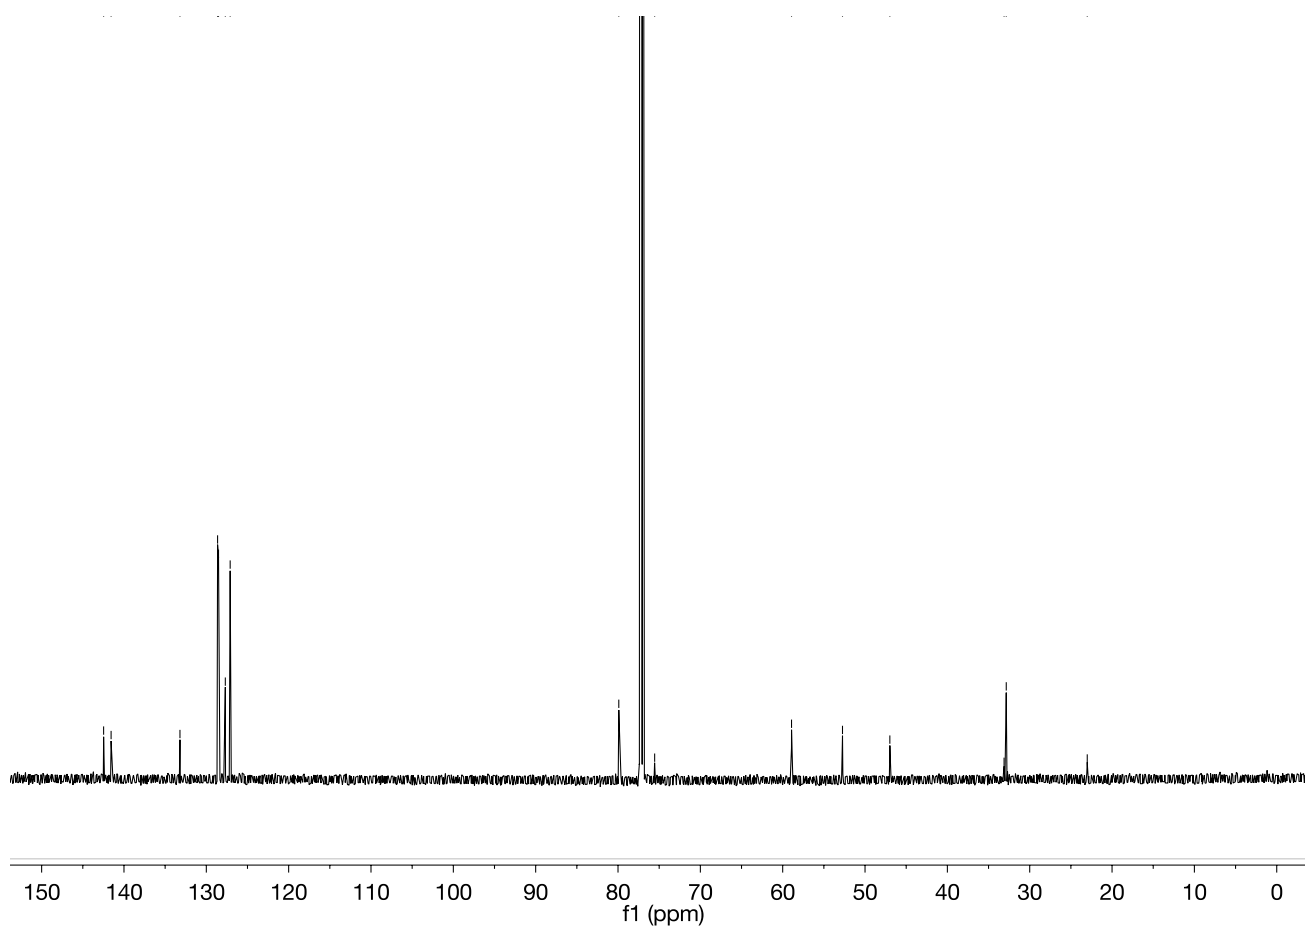

# $^1\text{H}$ and $^{13}\text{C}$ NMR Spectra for **37**

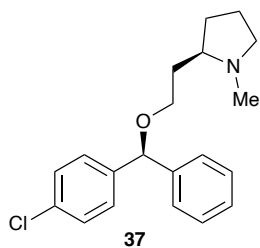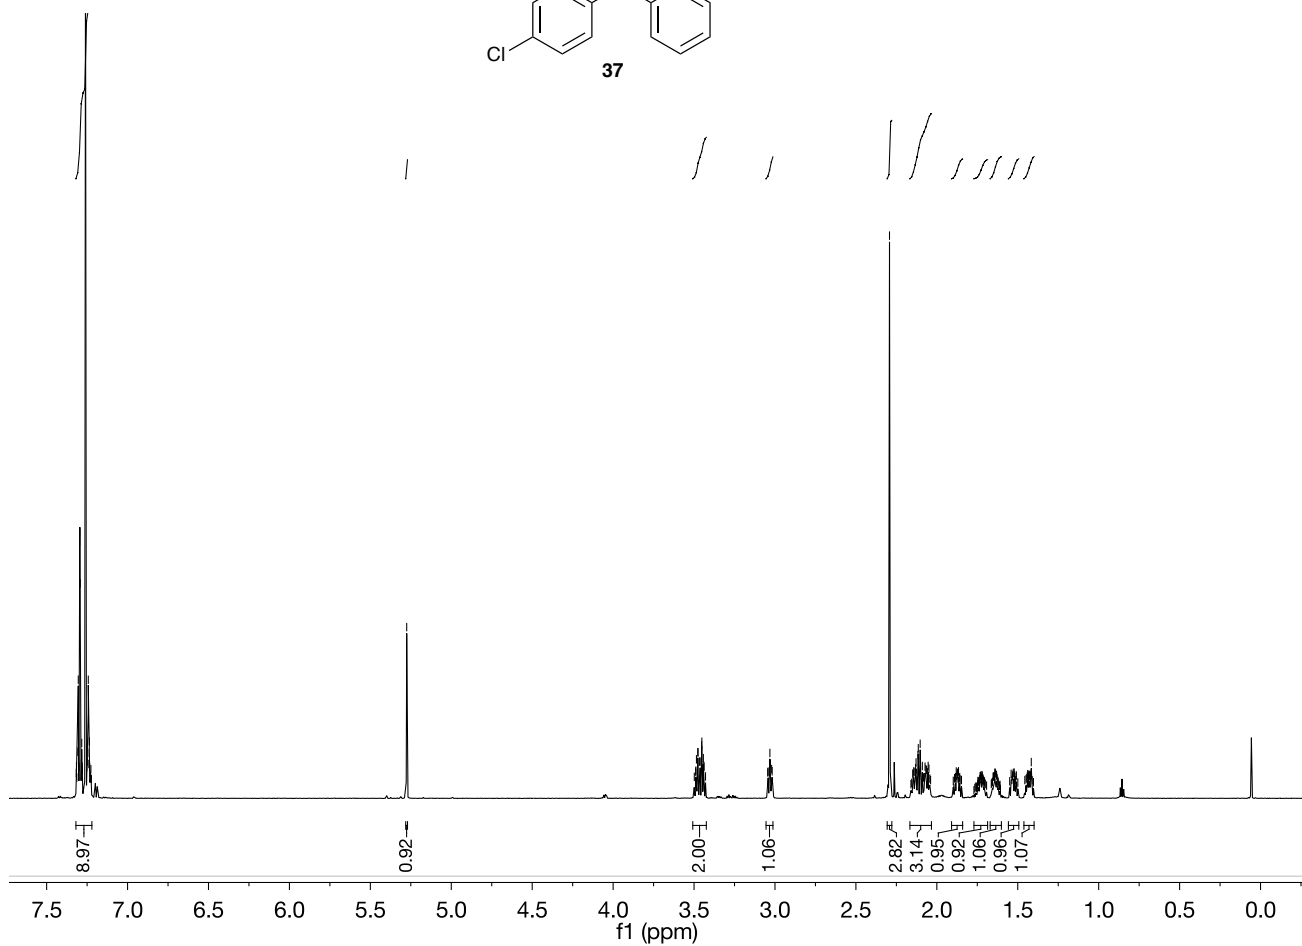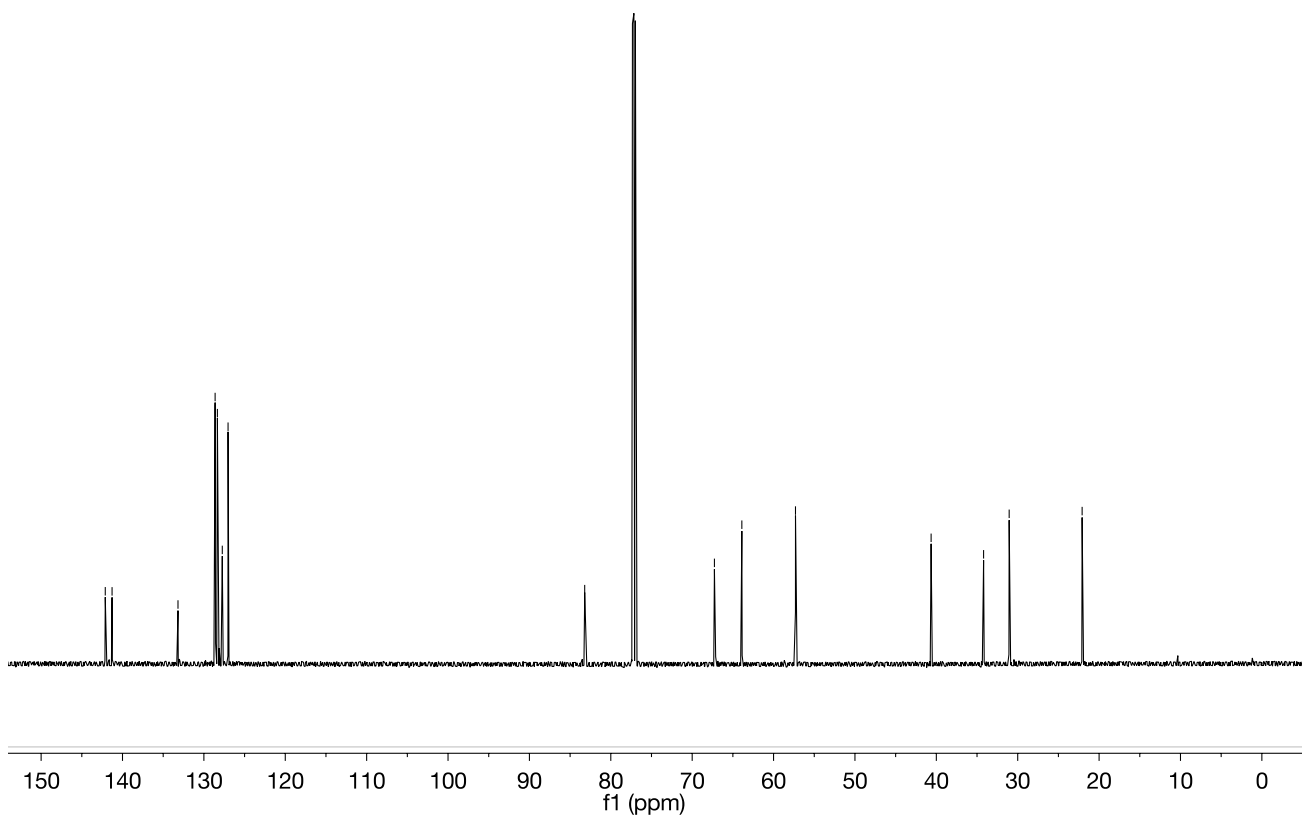



# $^1\text{H}$ and $^{13}\text{C}$ NMR Spectra for **38a**

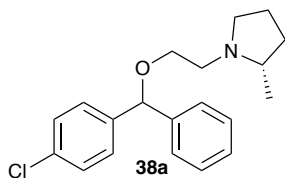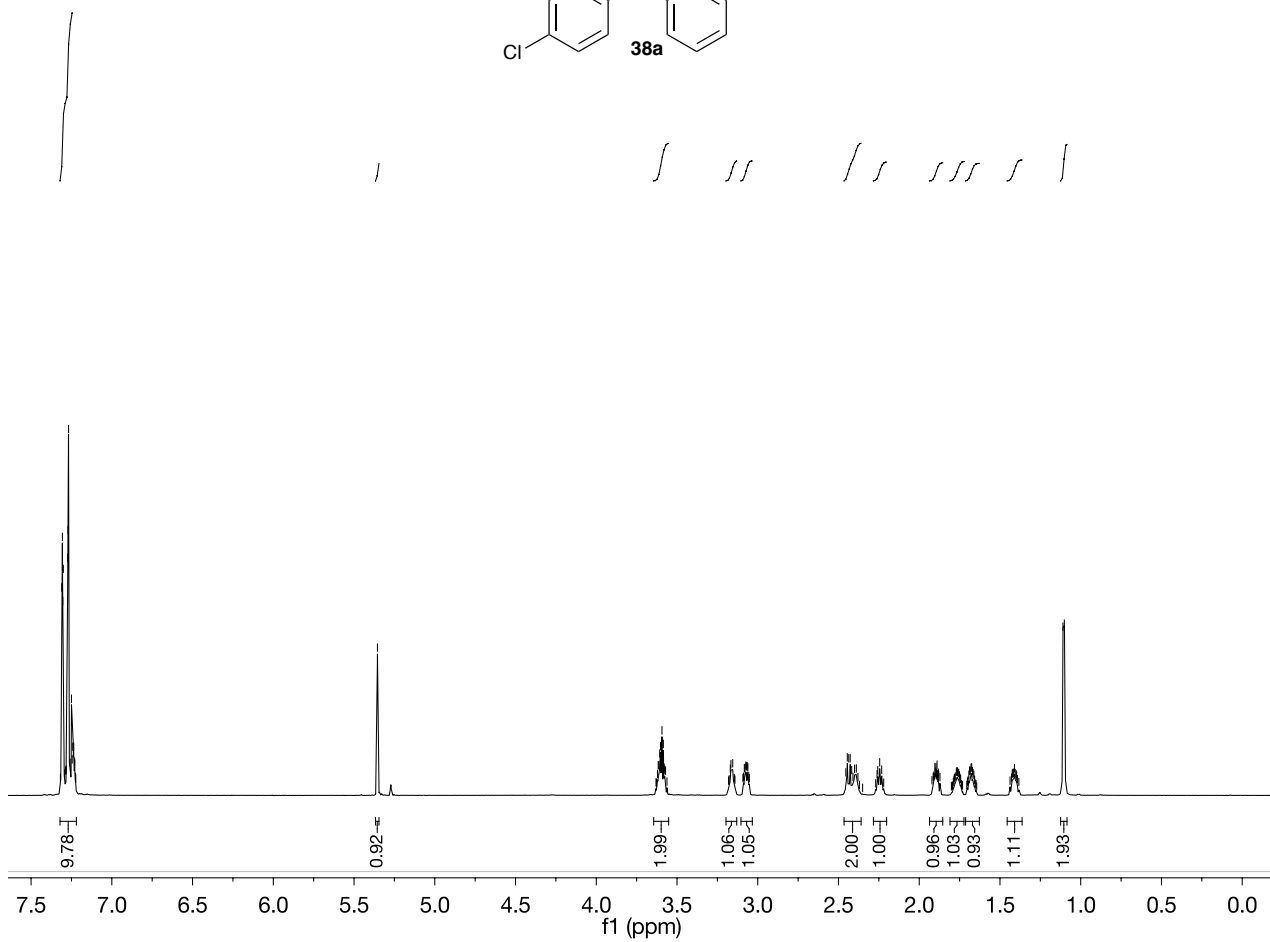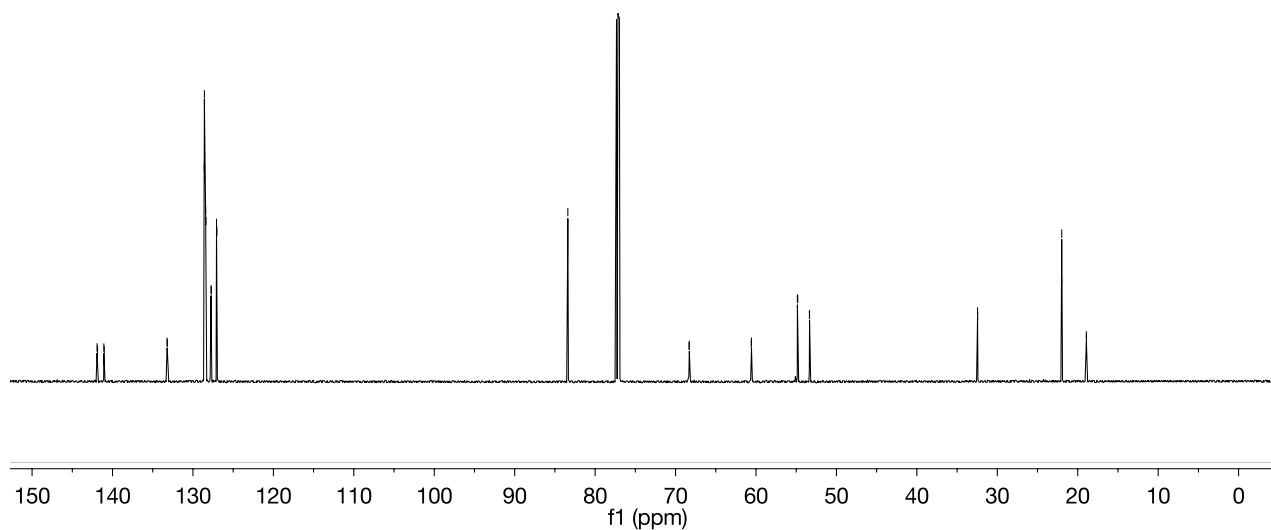

# $^1\text{H}$ and $^{13}\text{C}$ NMR Spectra for **38b**

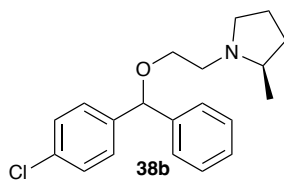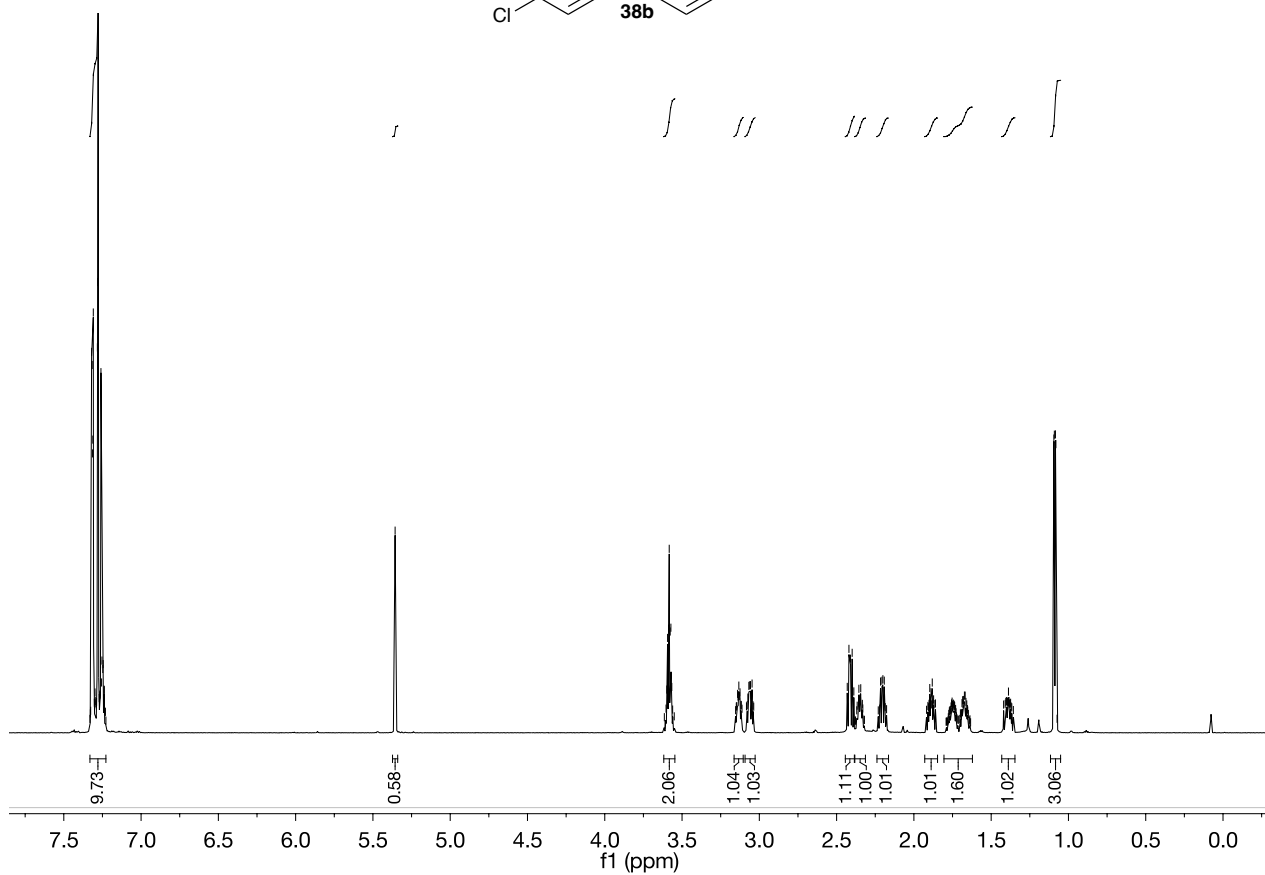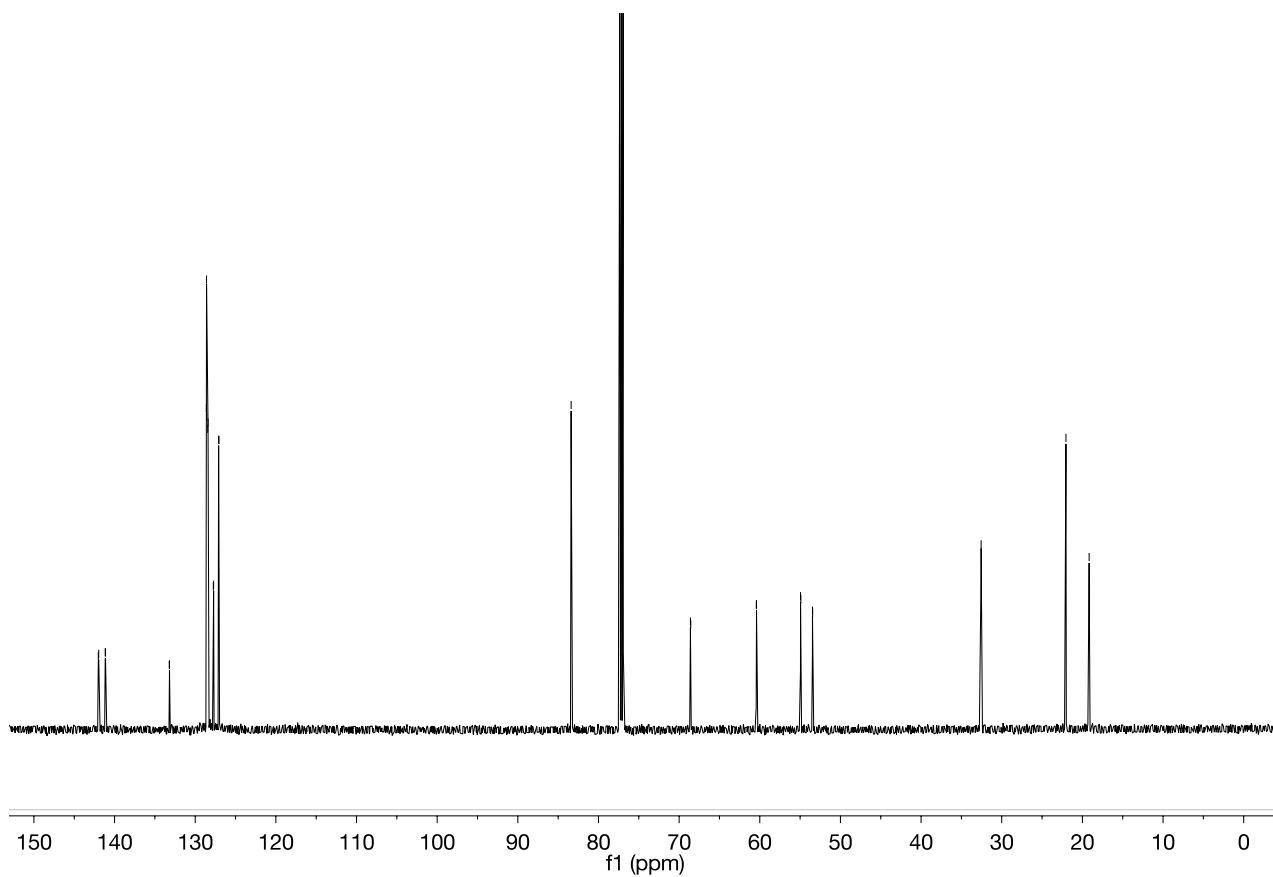

# $^1\text{H}$ and $^{13}\text{C}$ NMR Spectra for **38c**

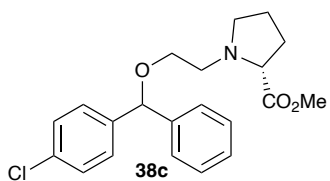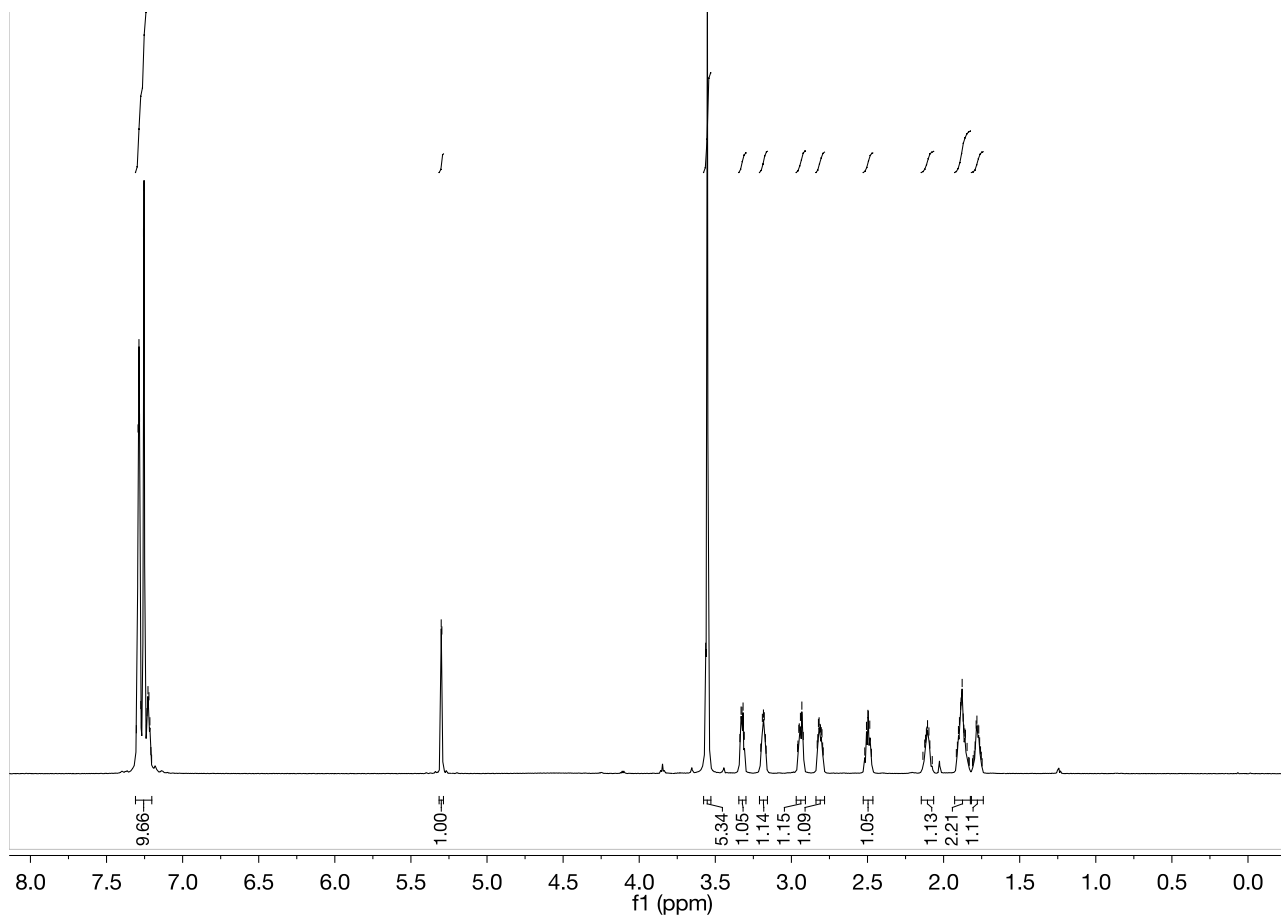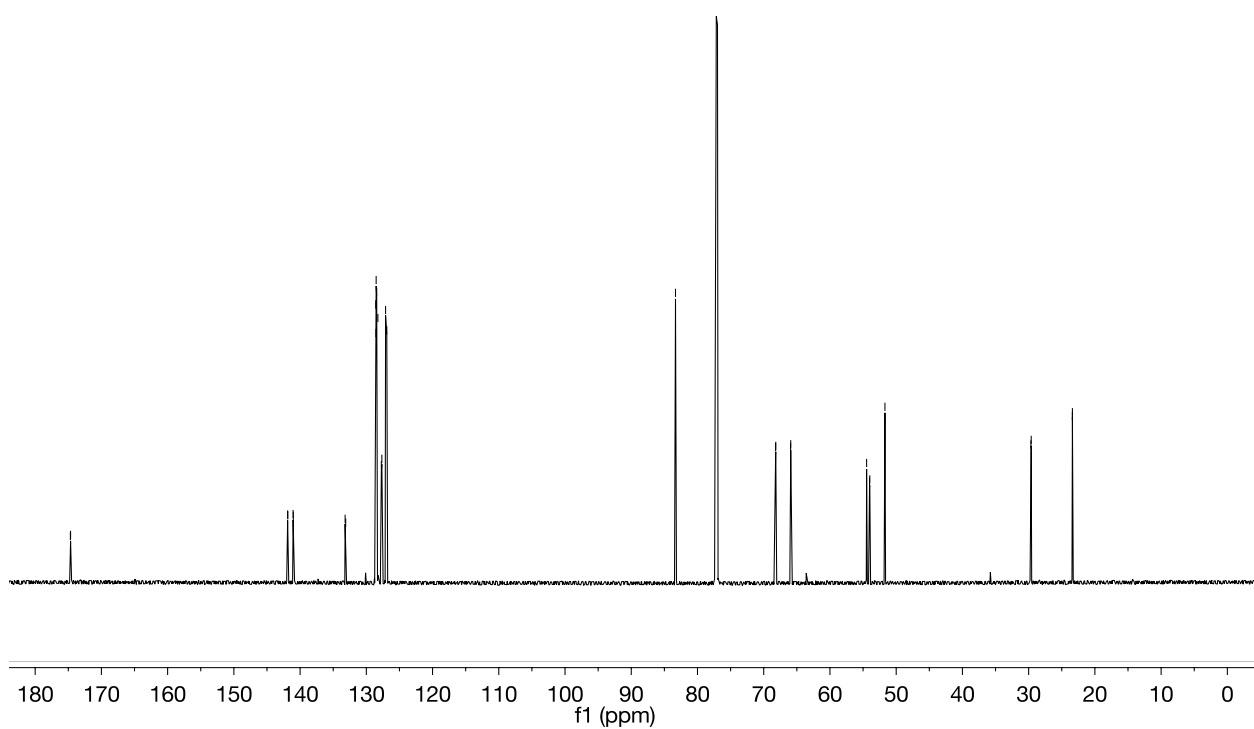

# $^1\text{H}$ and $^{13}\text{C}$ NMR Spectra for **38d**

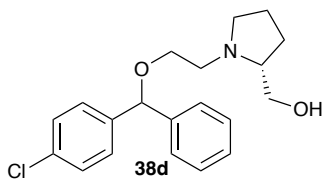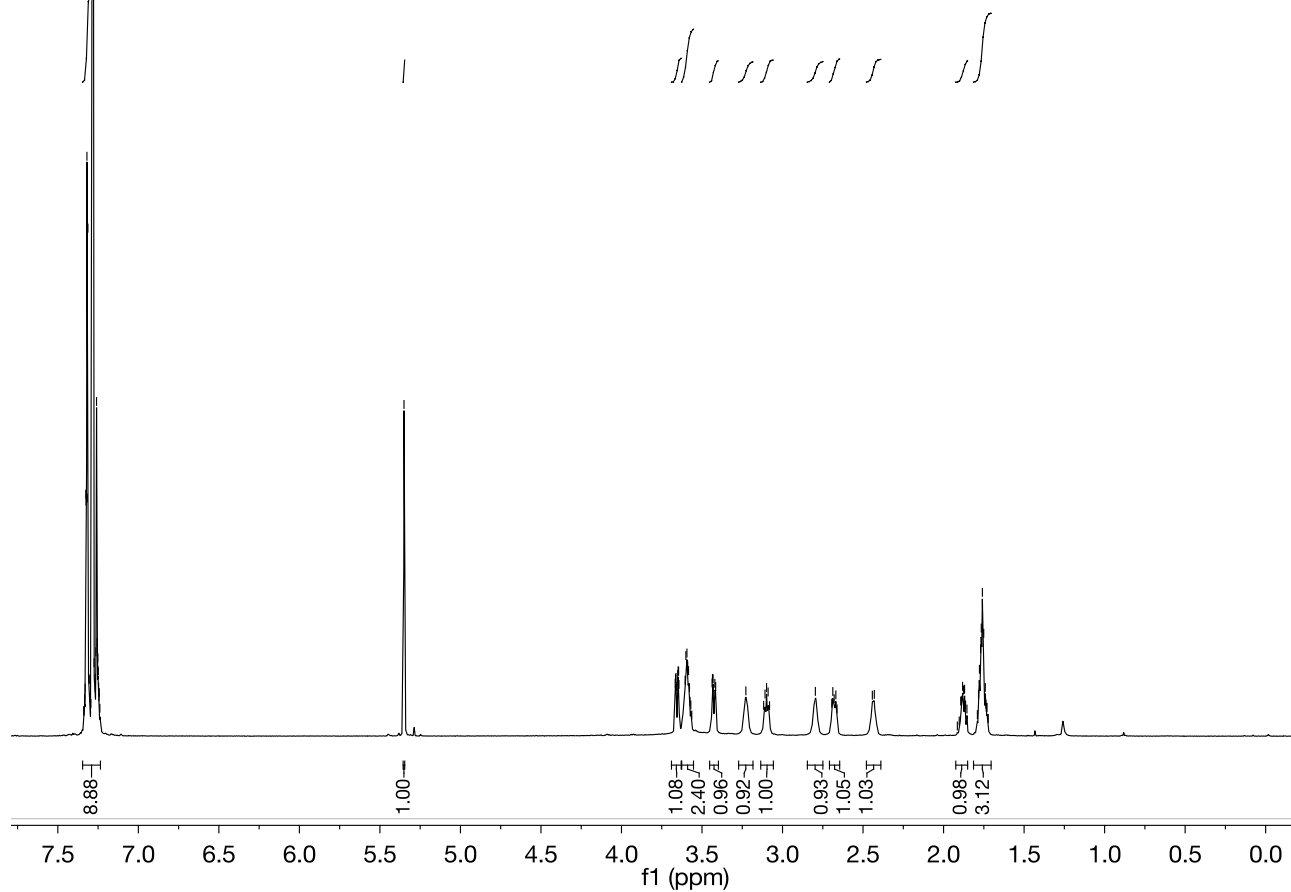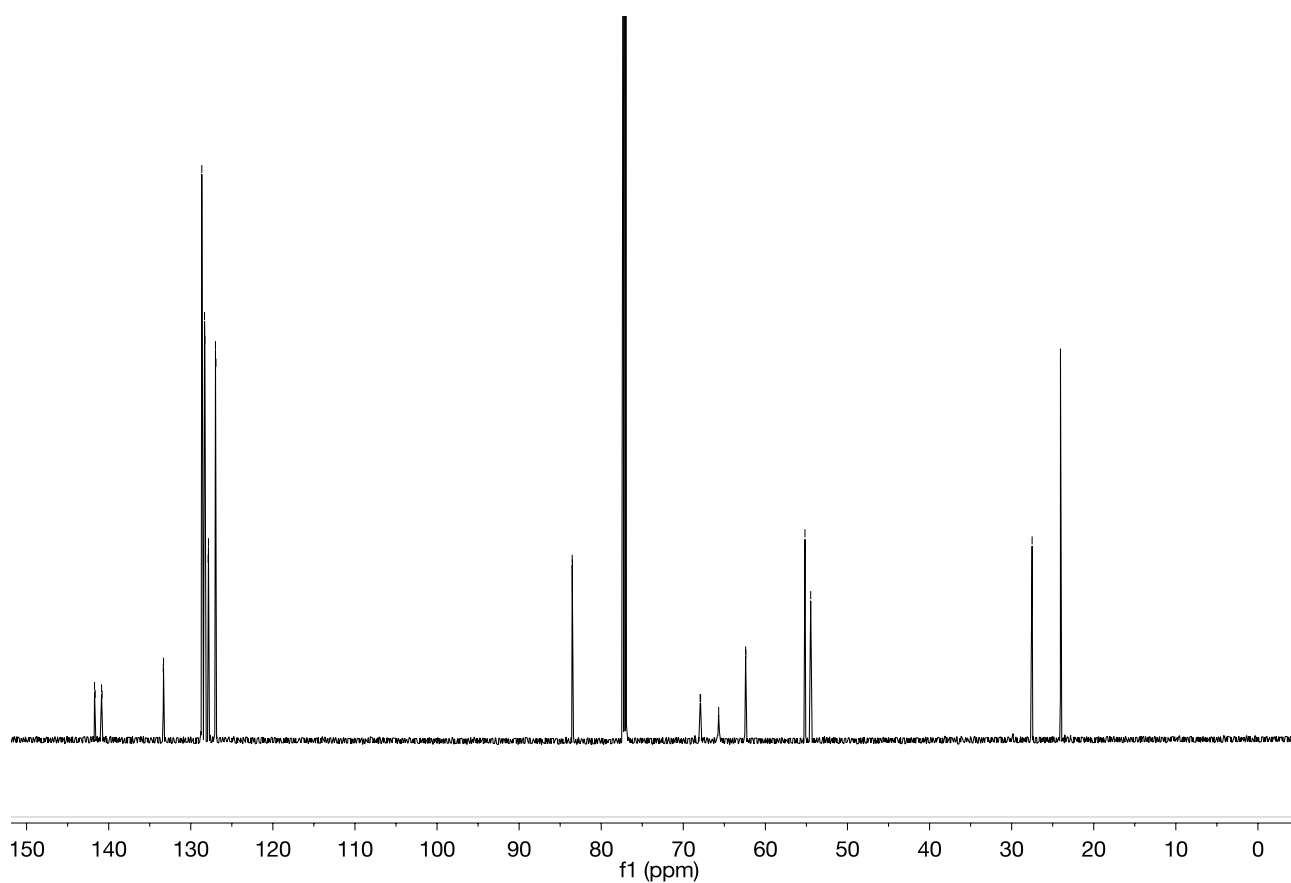

# $^1\text{H}$ and $^{13}\text{C}$ NMR Spectra for **38e**

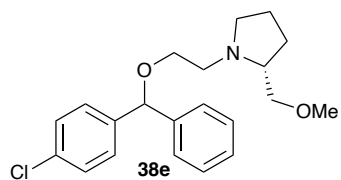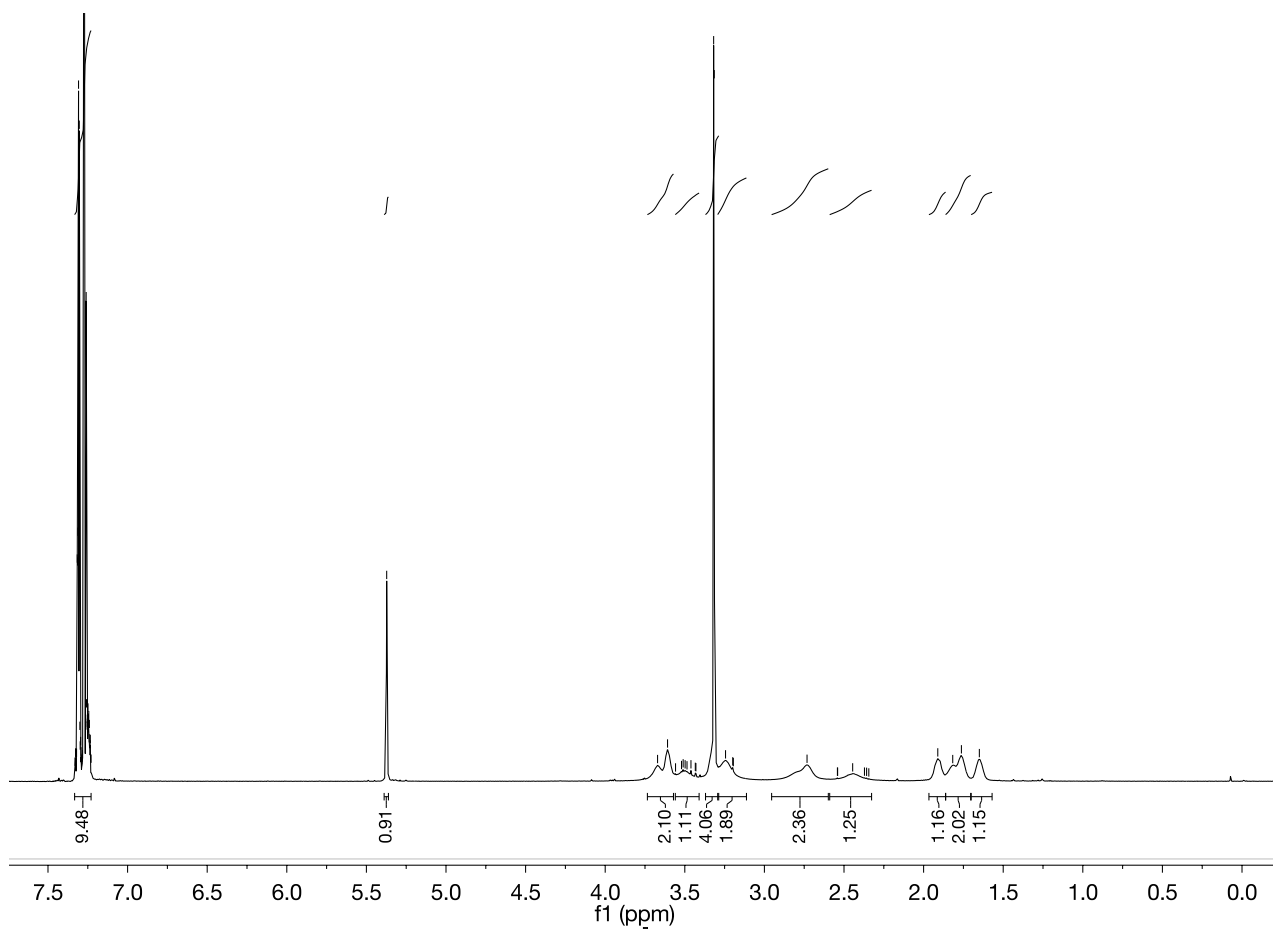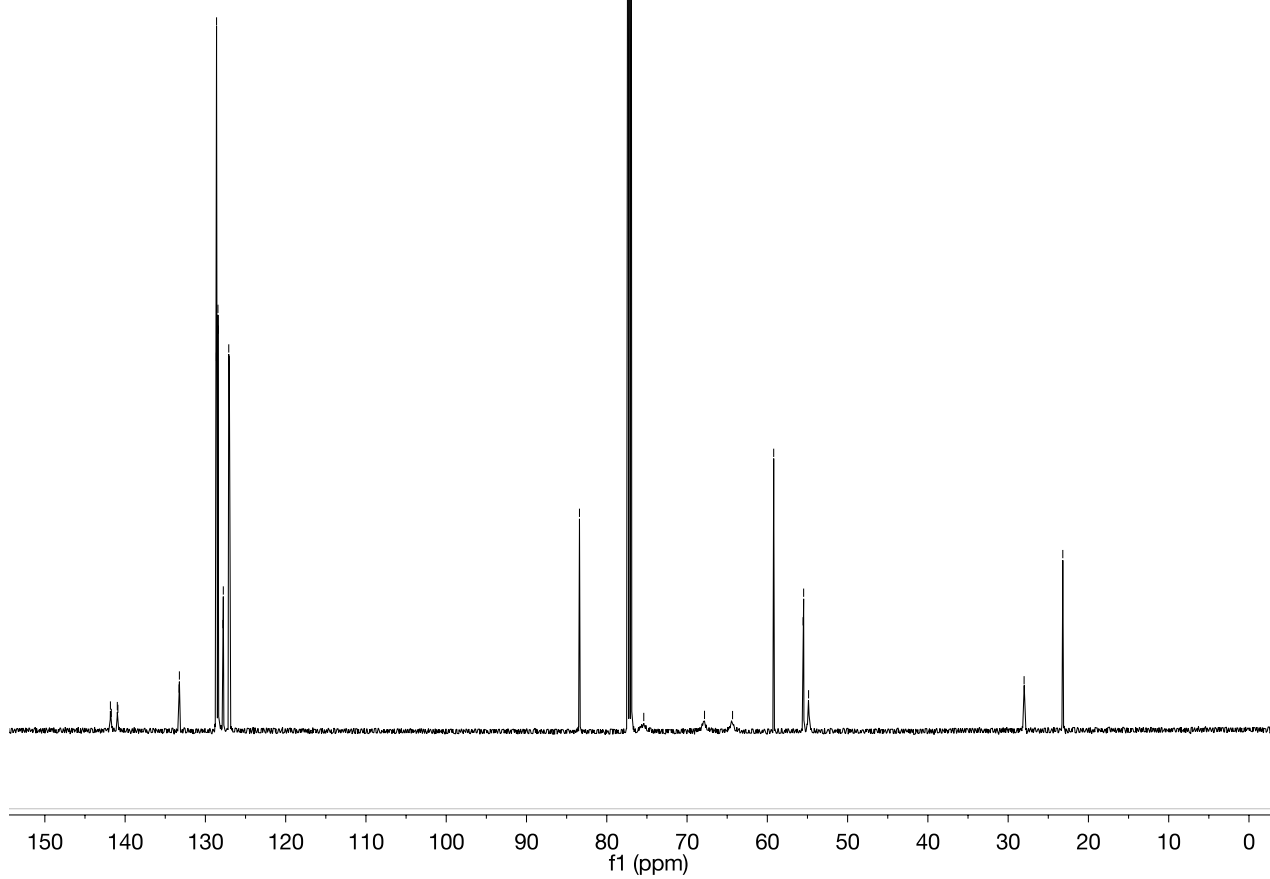

# $^1\text{H}$ and $^{13}\text{C}$ NMR Spectra for **38f**

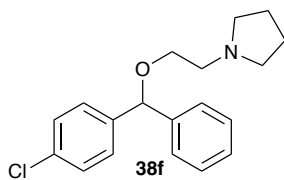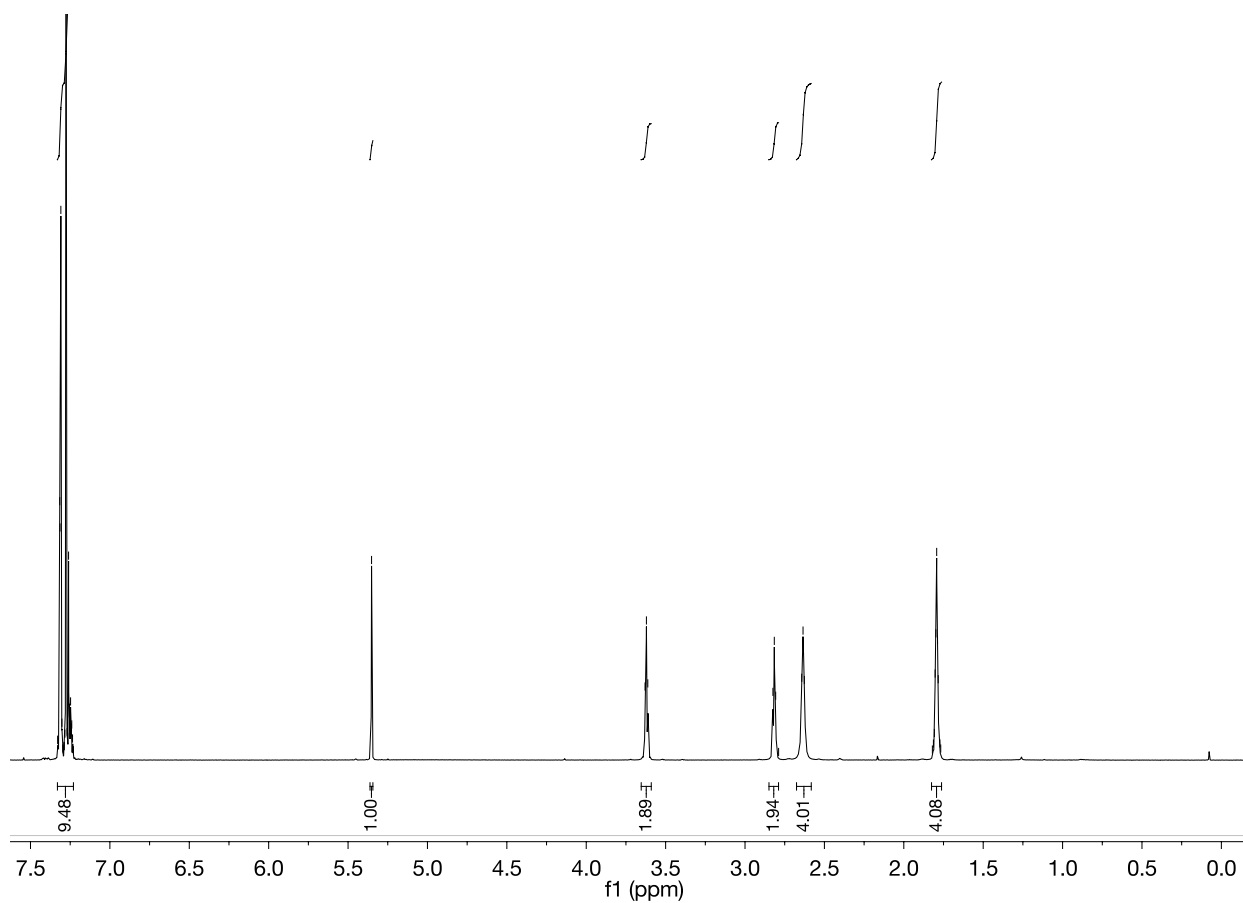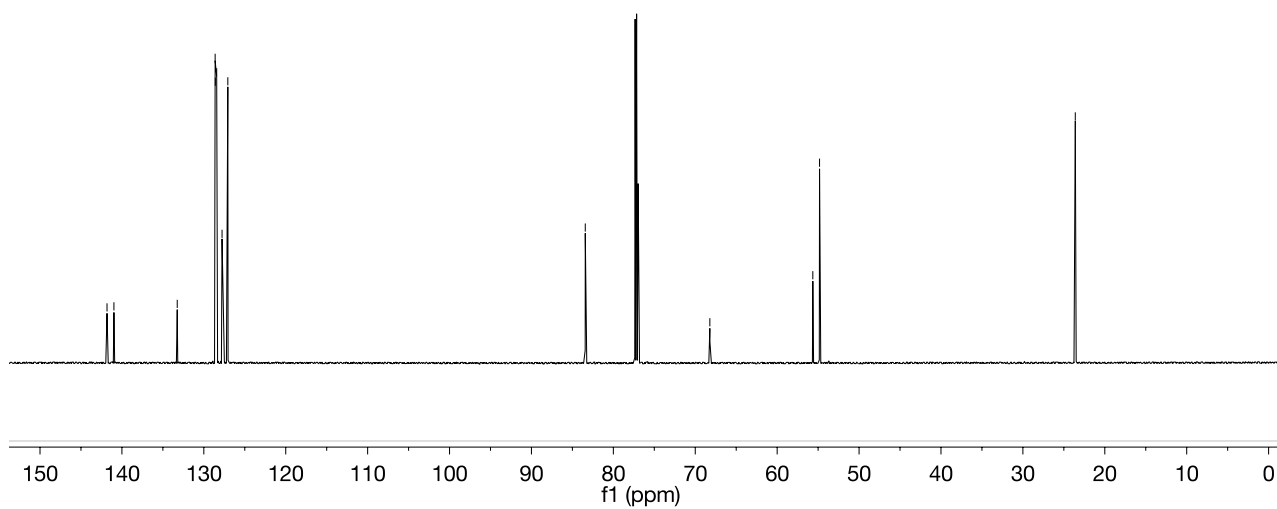

# $^1\text{H}$ and $^{13}\text{C}$ NMR Spectra for **38g**

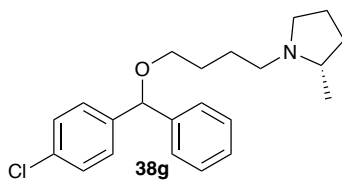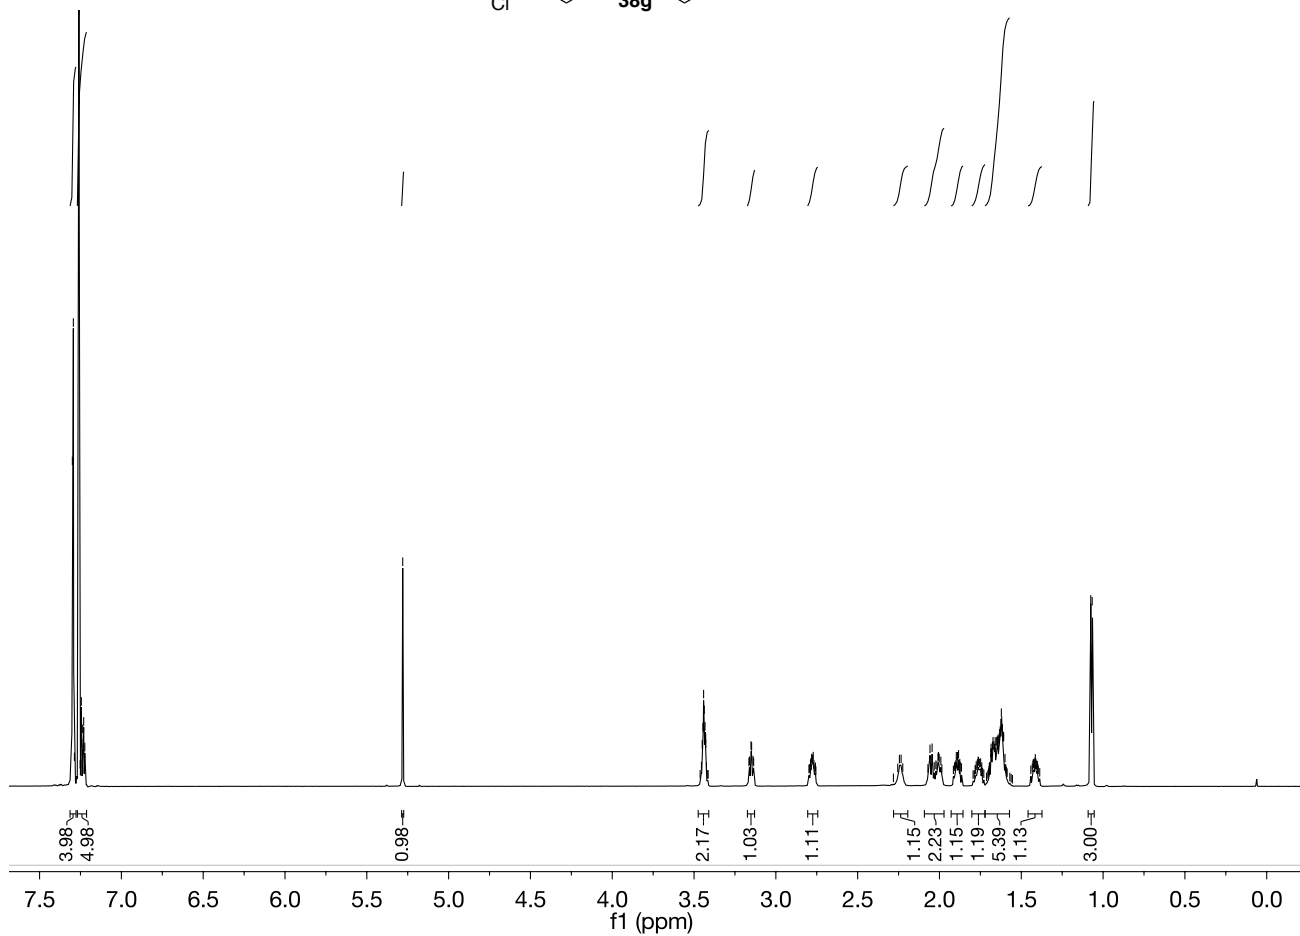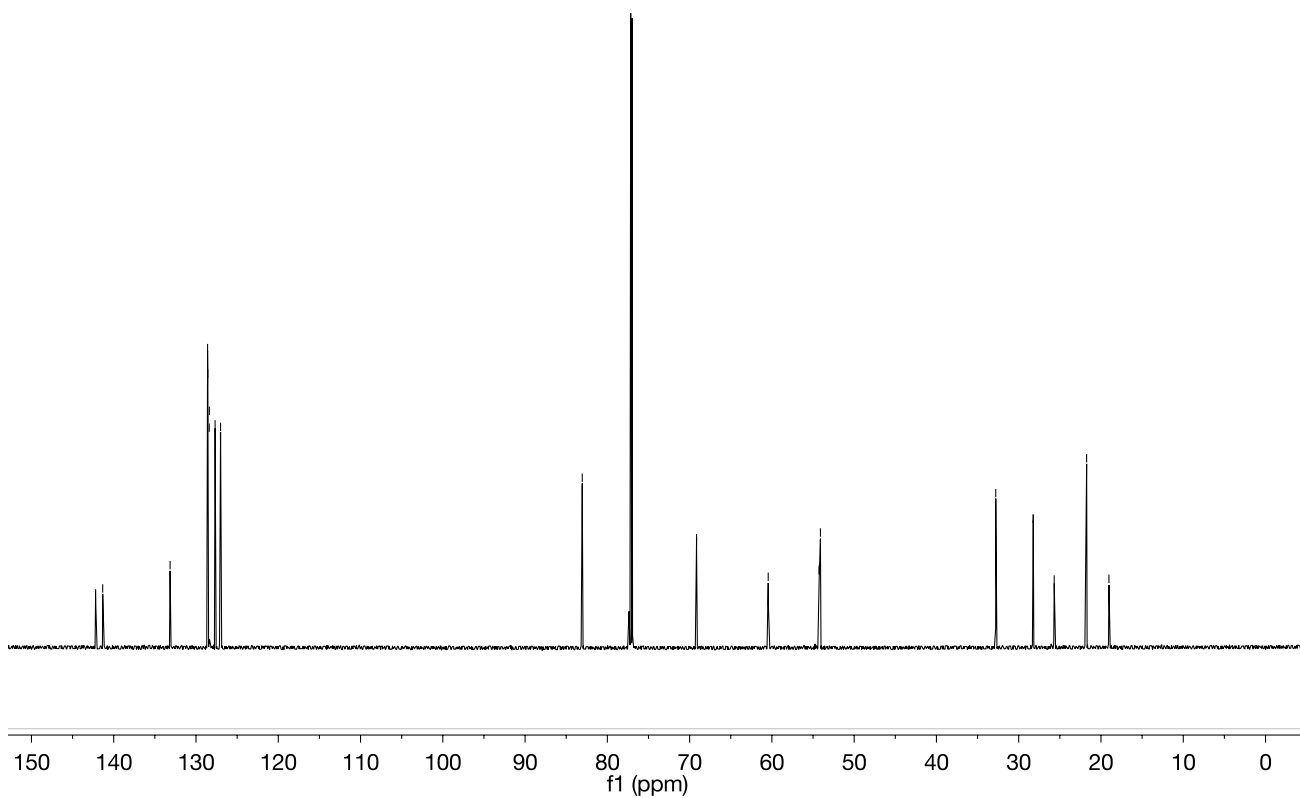

# $^1\text{H}$ and $^{13}\text{C}$ NMR Spectra for **38h**

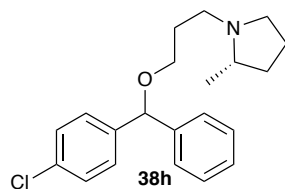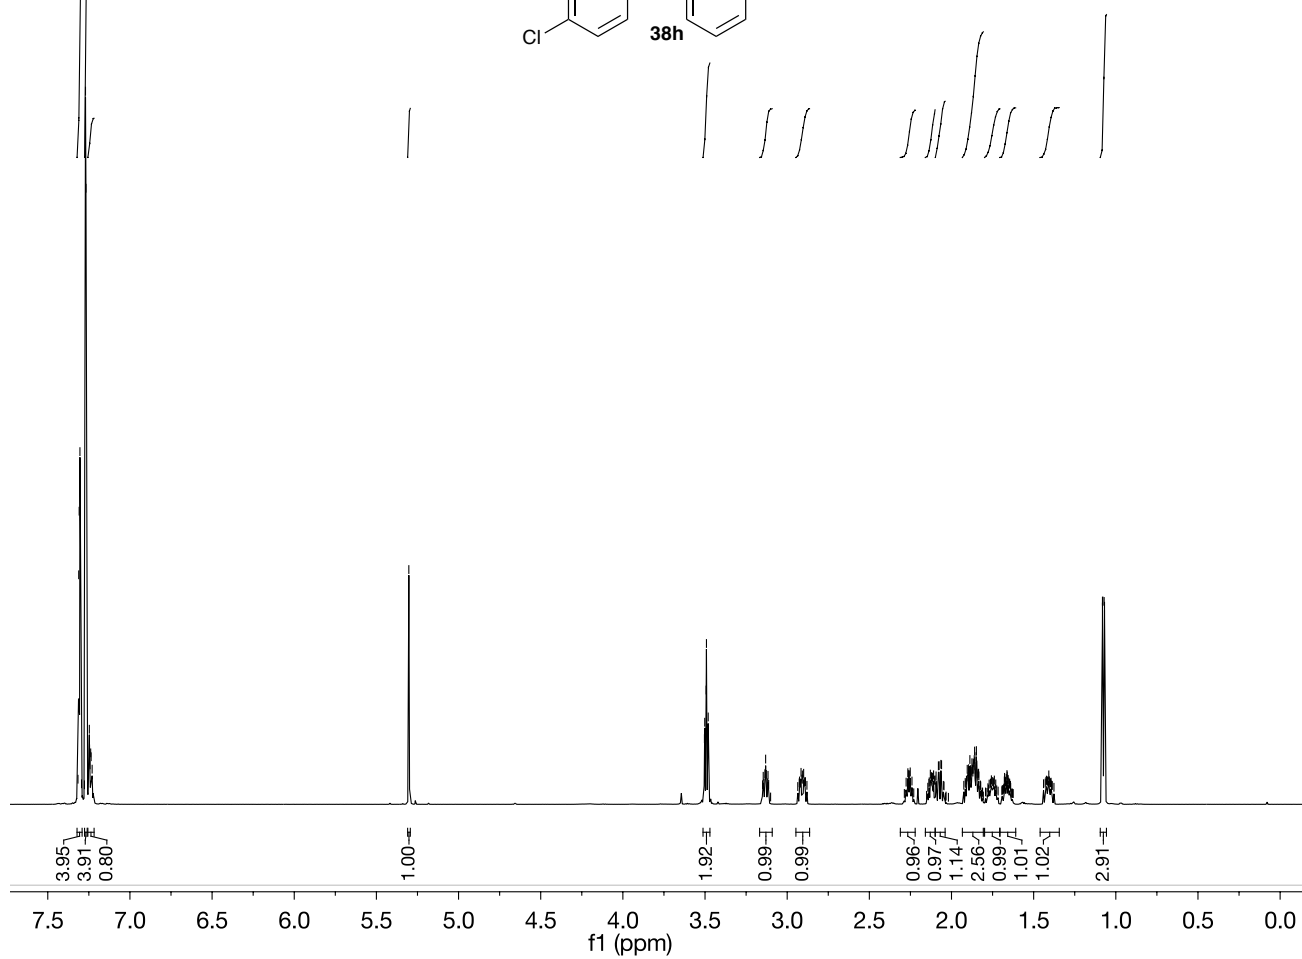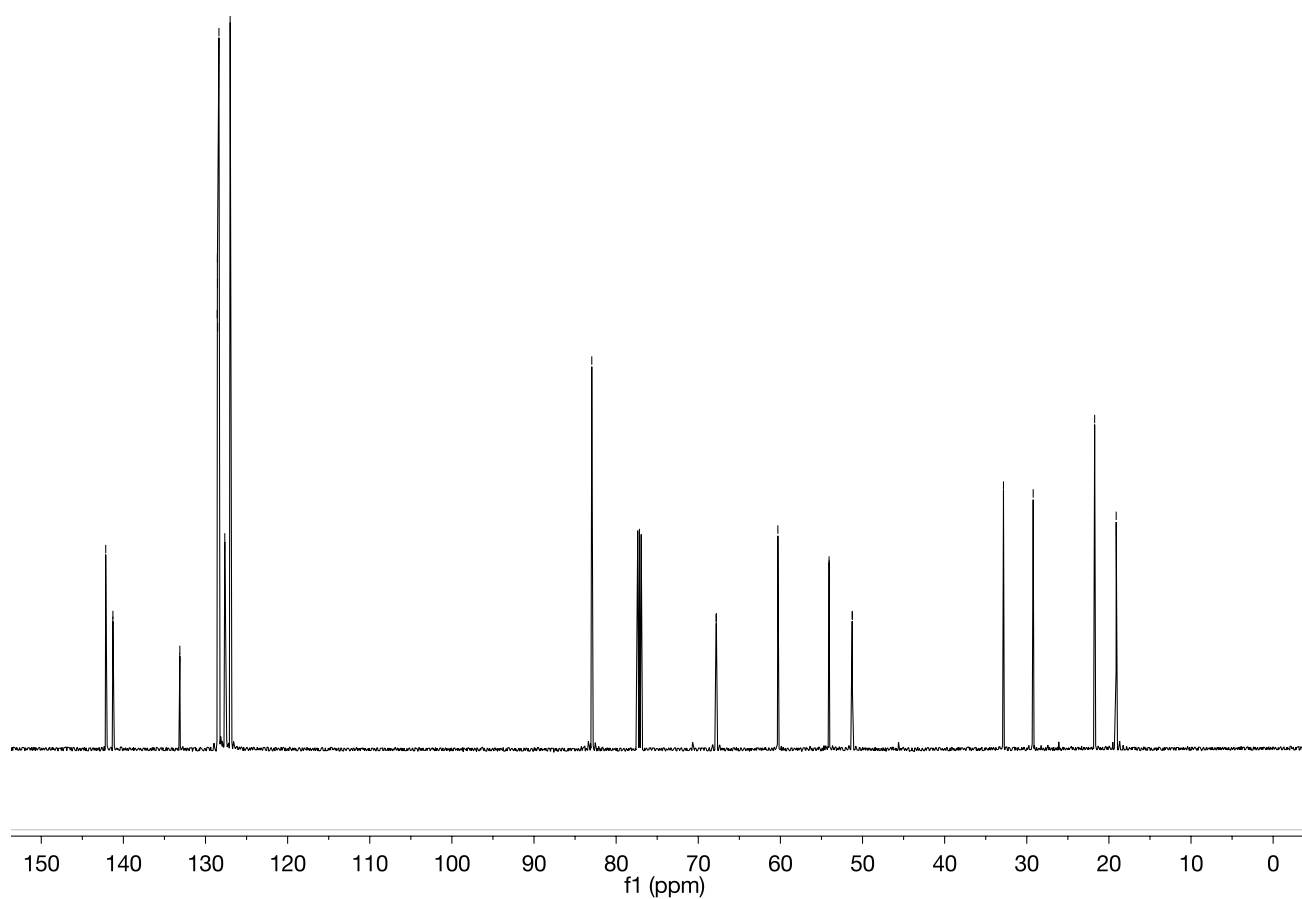



# $^1\text{H}$ and $^{13}\text{C}$ NMR Spectra for **38i**

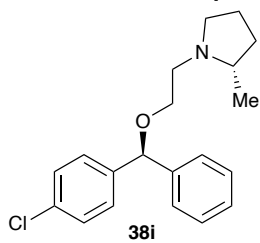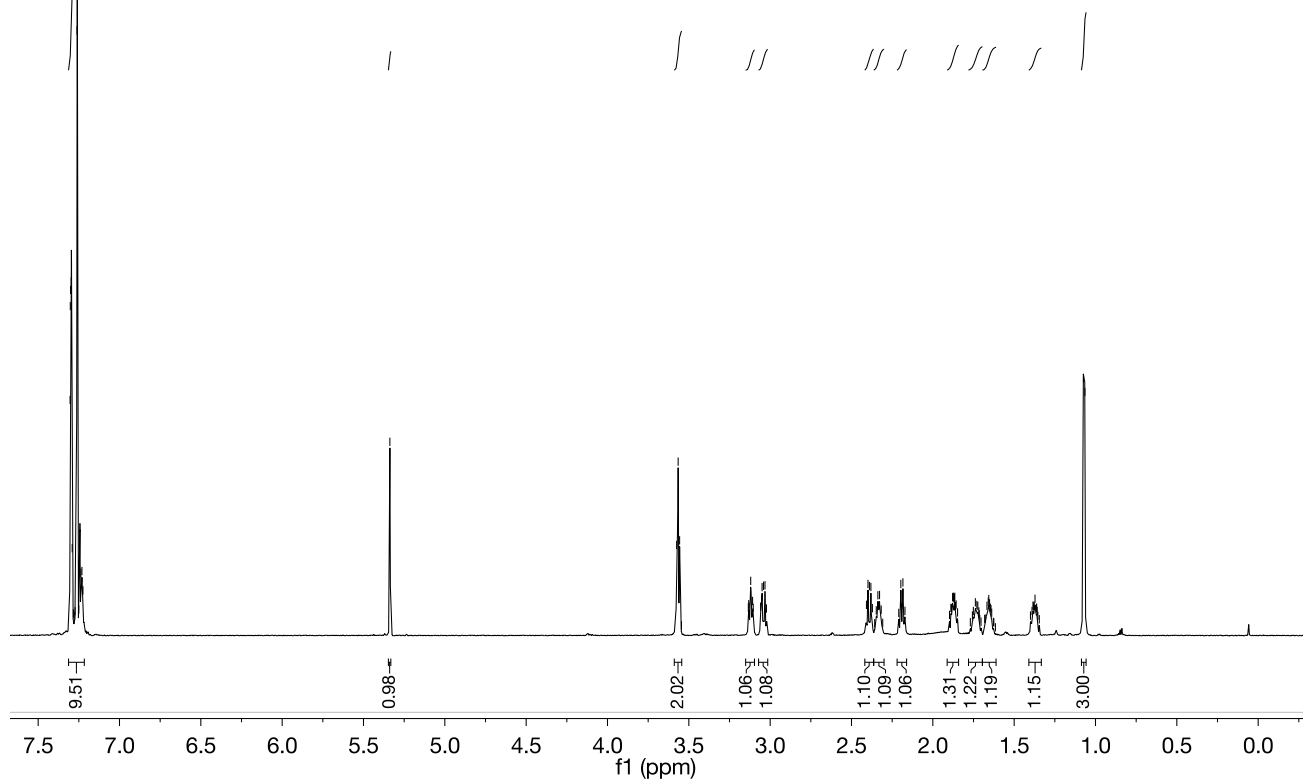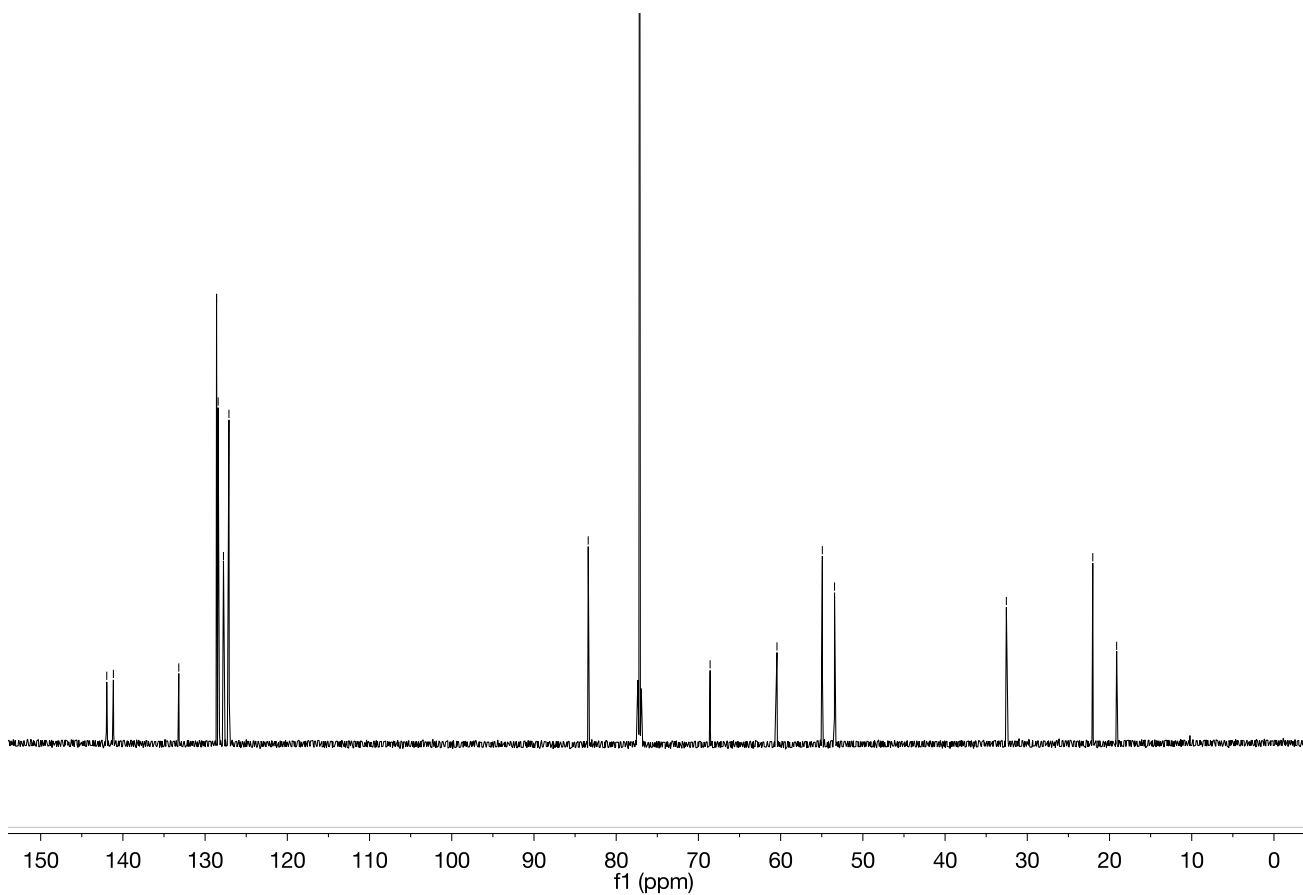

# $^1\text{H}$ and $^{13}\text{C}$ NMR Spectra for **38j**

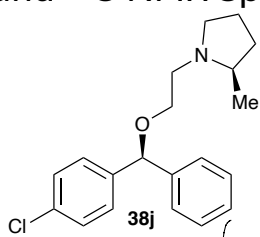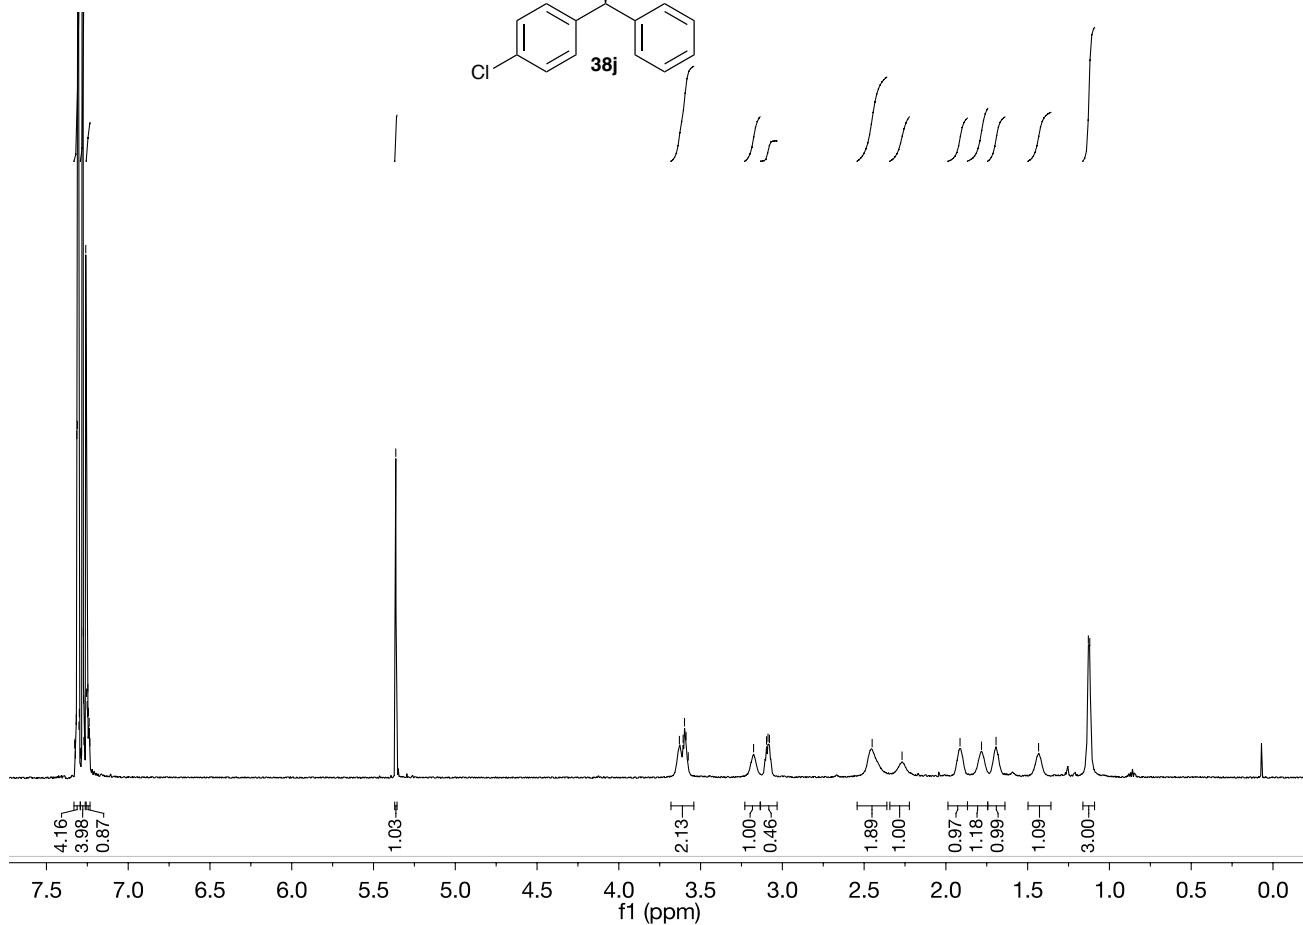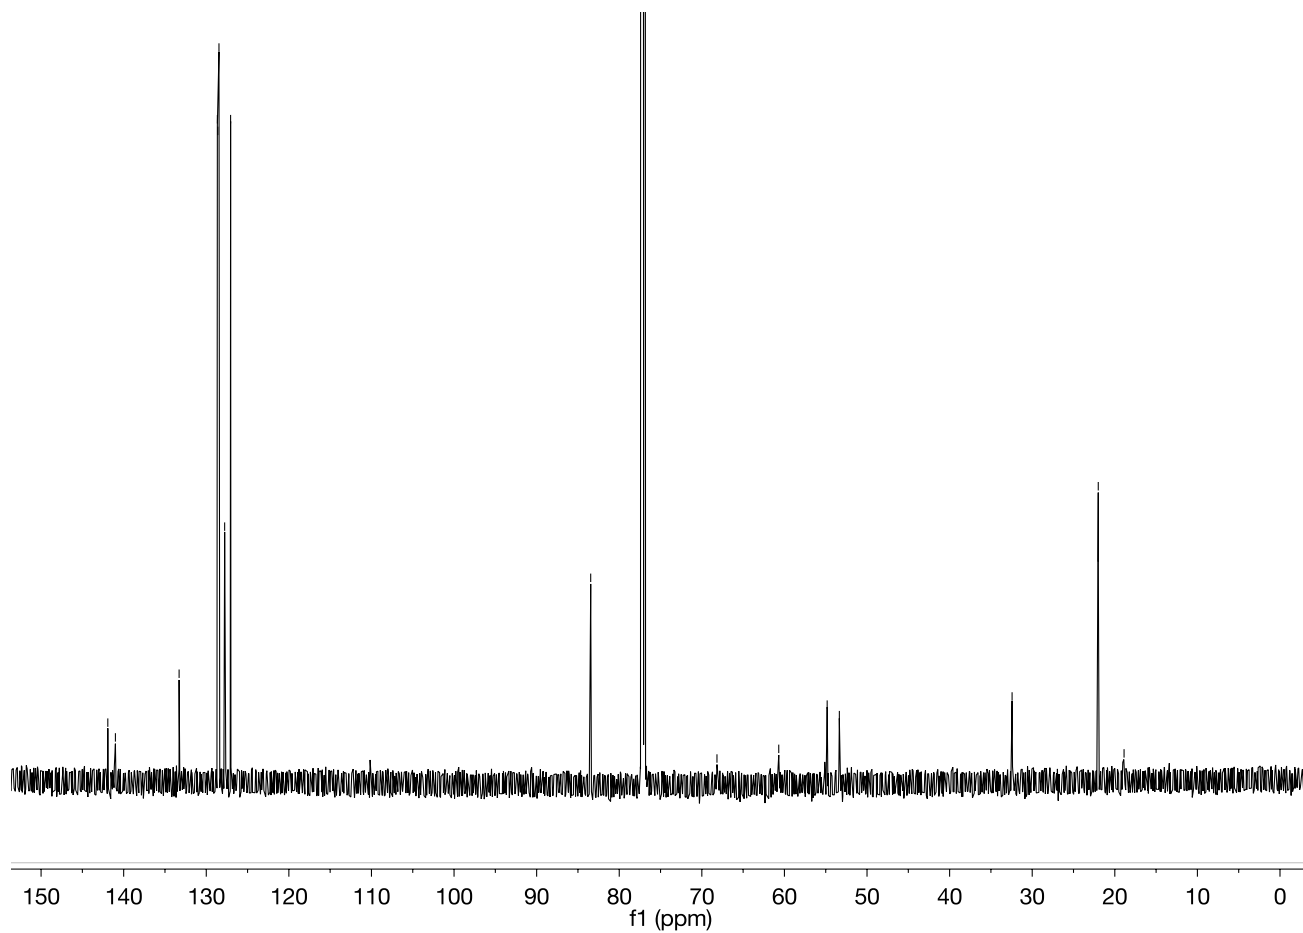

# $^1\text{H}$ and $^{13}\text{C}$ NMR Spectra for **38k**

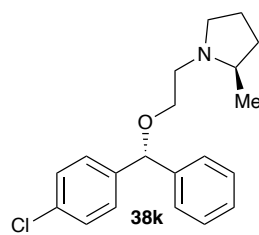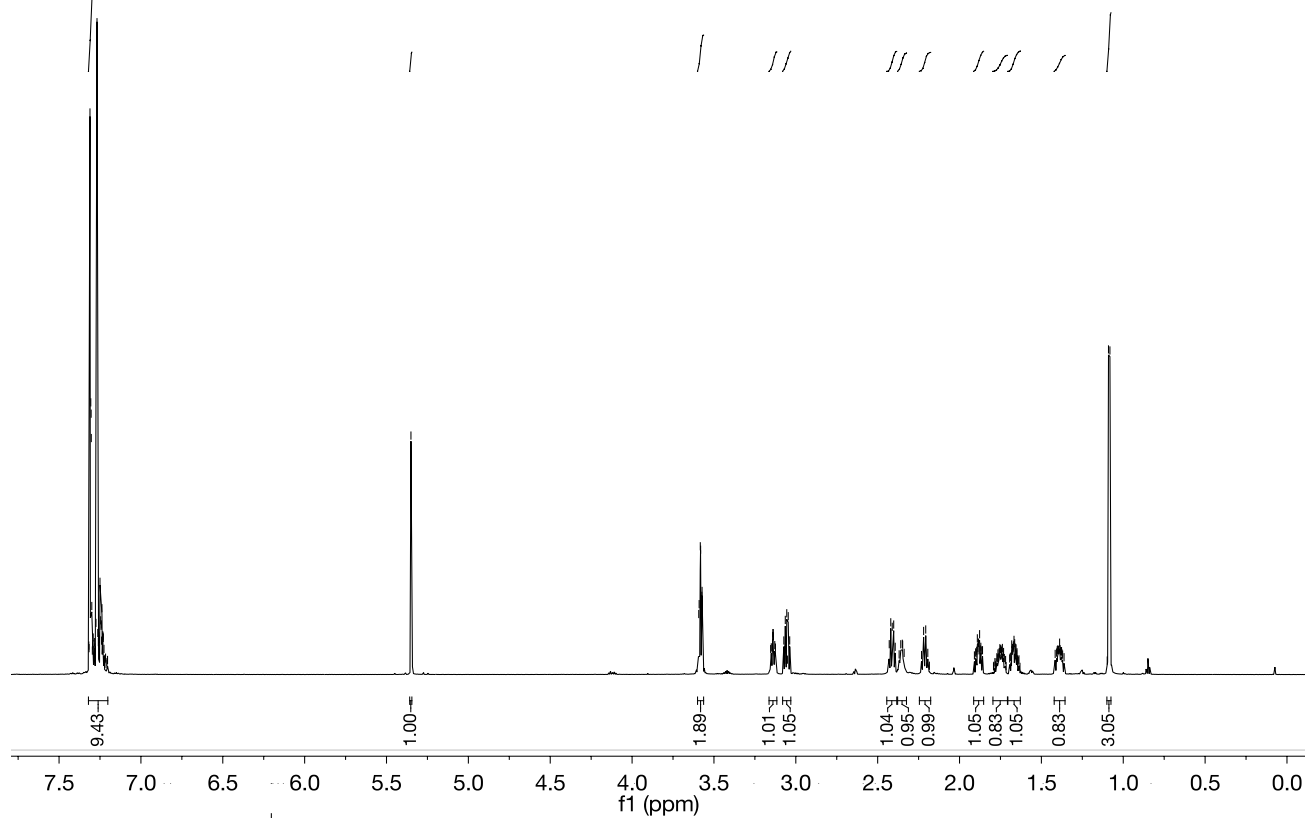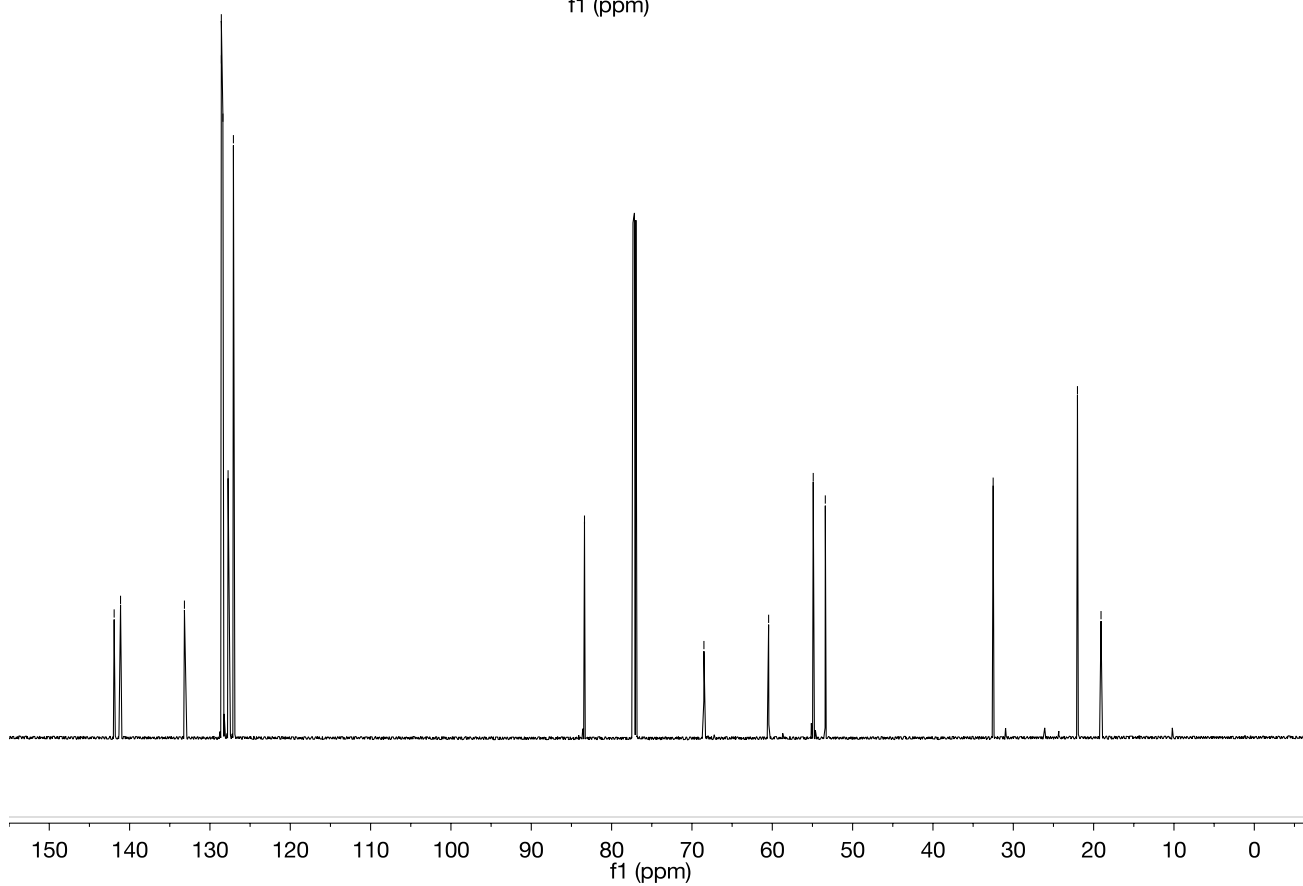

# $^1\text{H}$ and $^{13}\text{C}$ NMR Spectra for **38l**

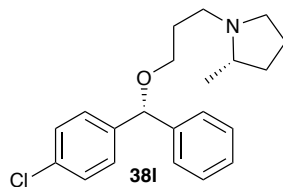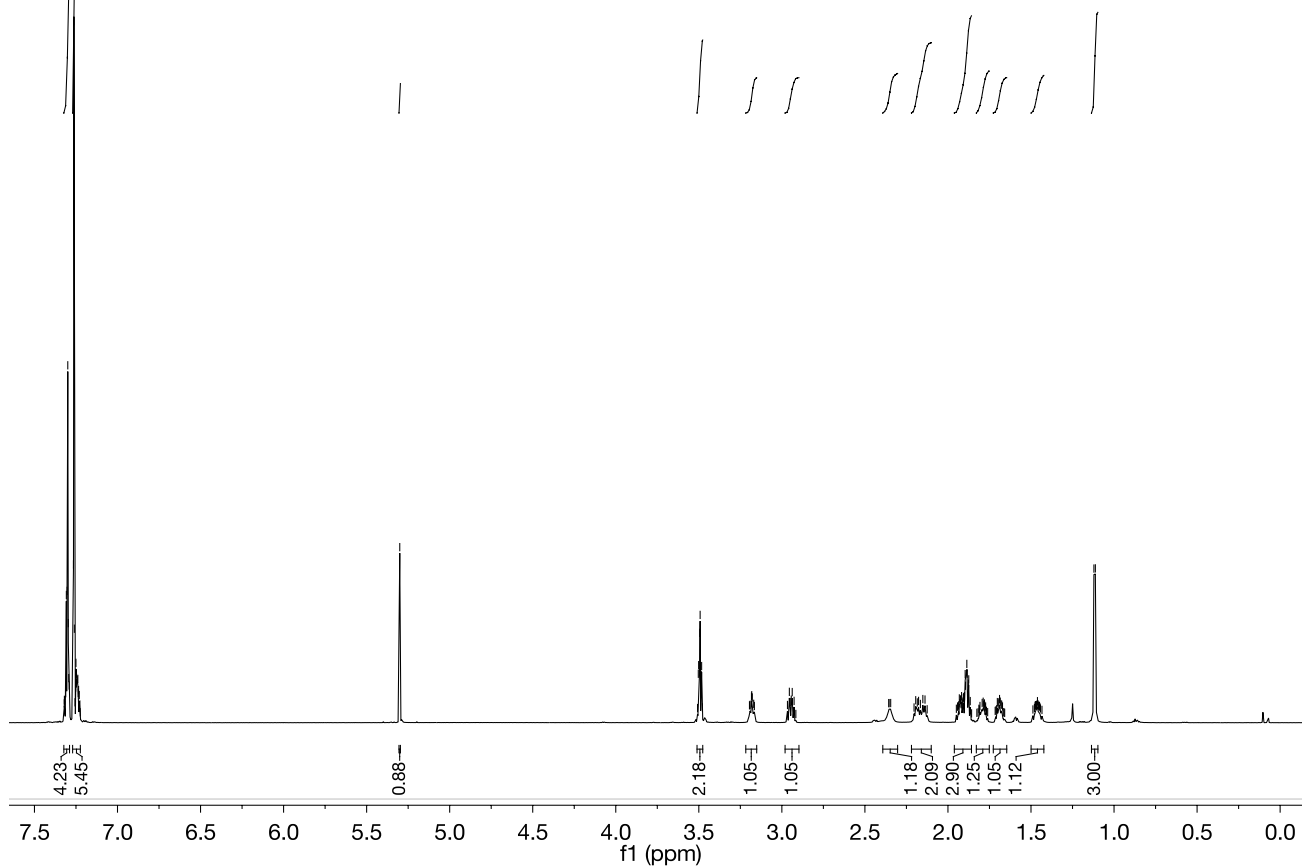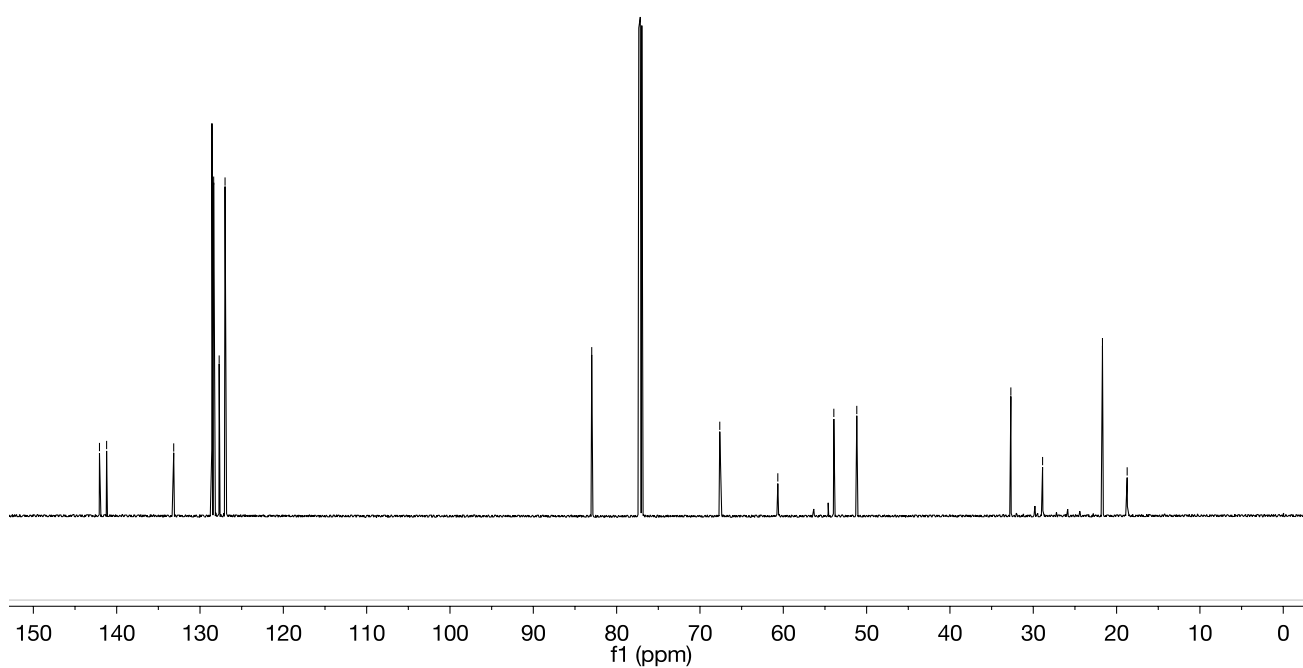

# $^1\text{H}$ and $^{13}\text{C}$ NMR Spectra for **38m**

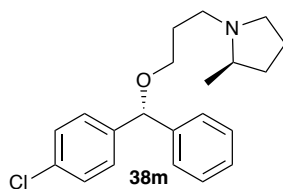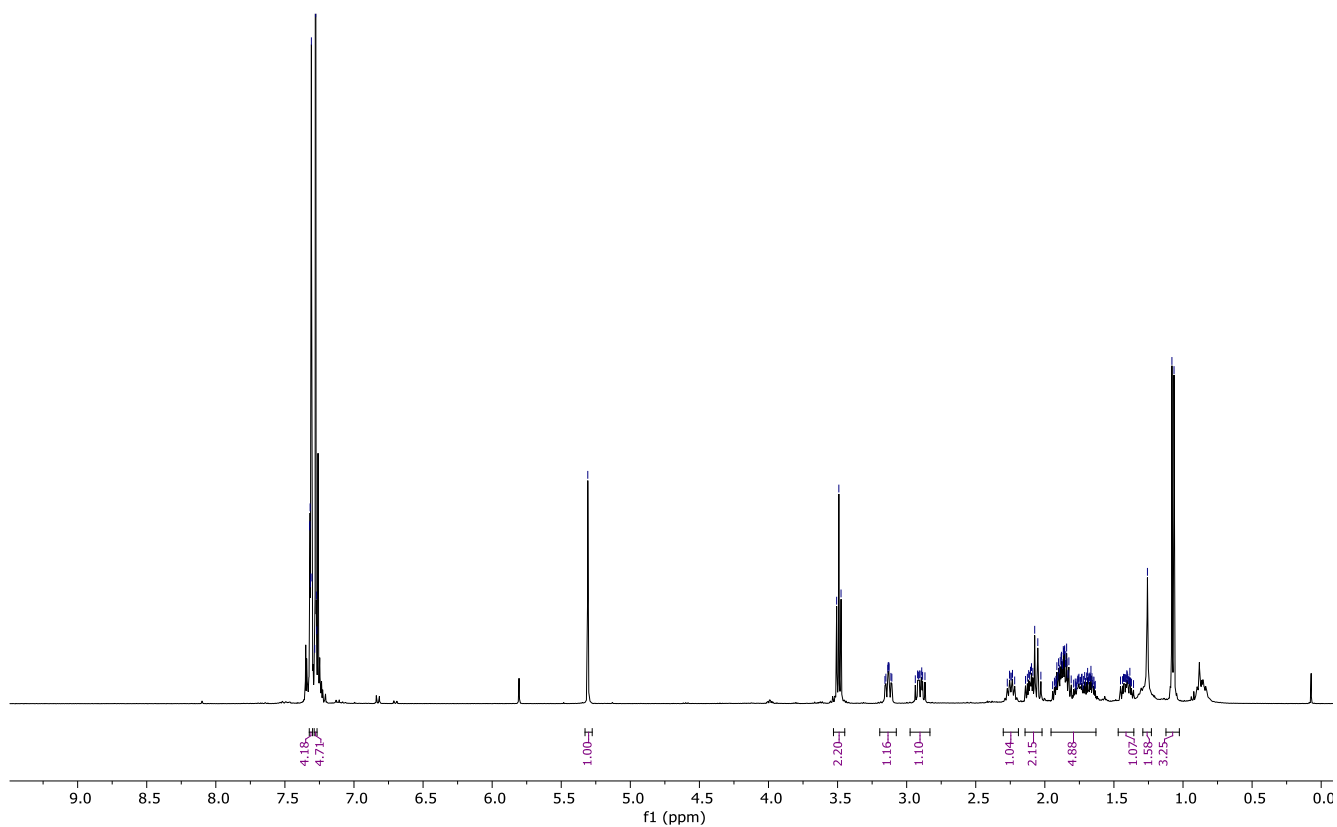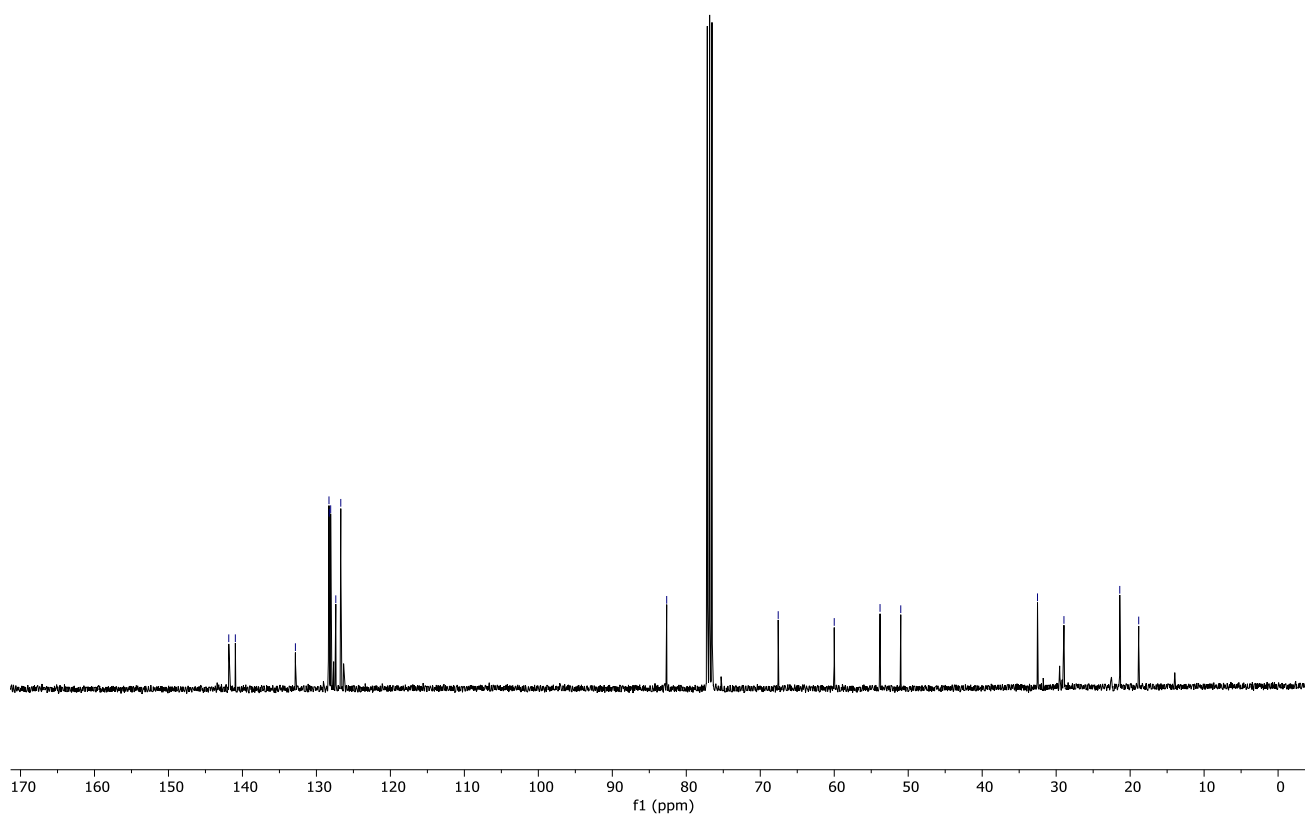

# <sup>1</sup>H and <sup>13</sup>C NMR Spectra for **38n**

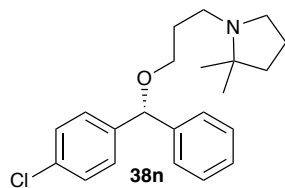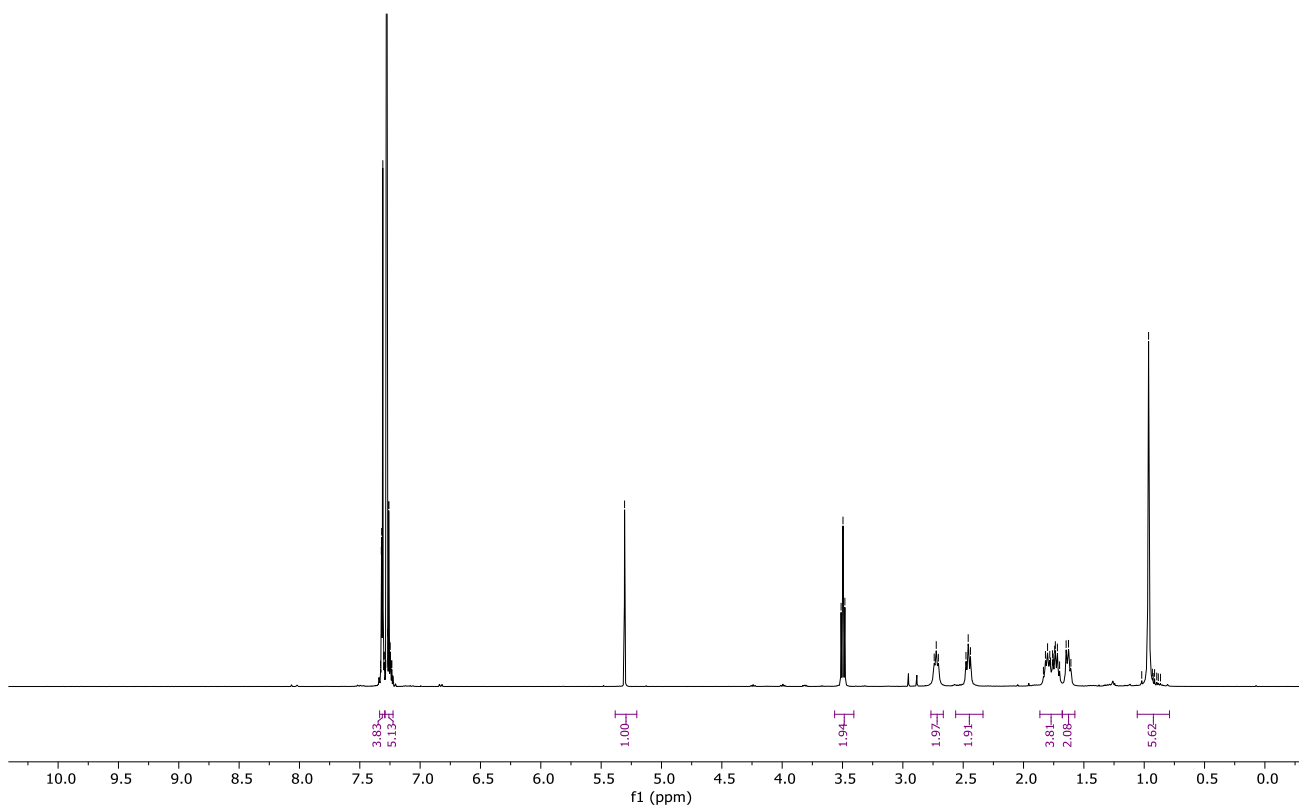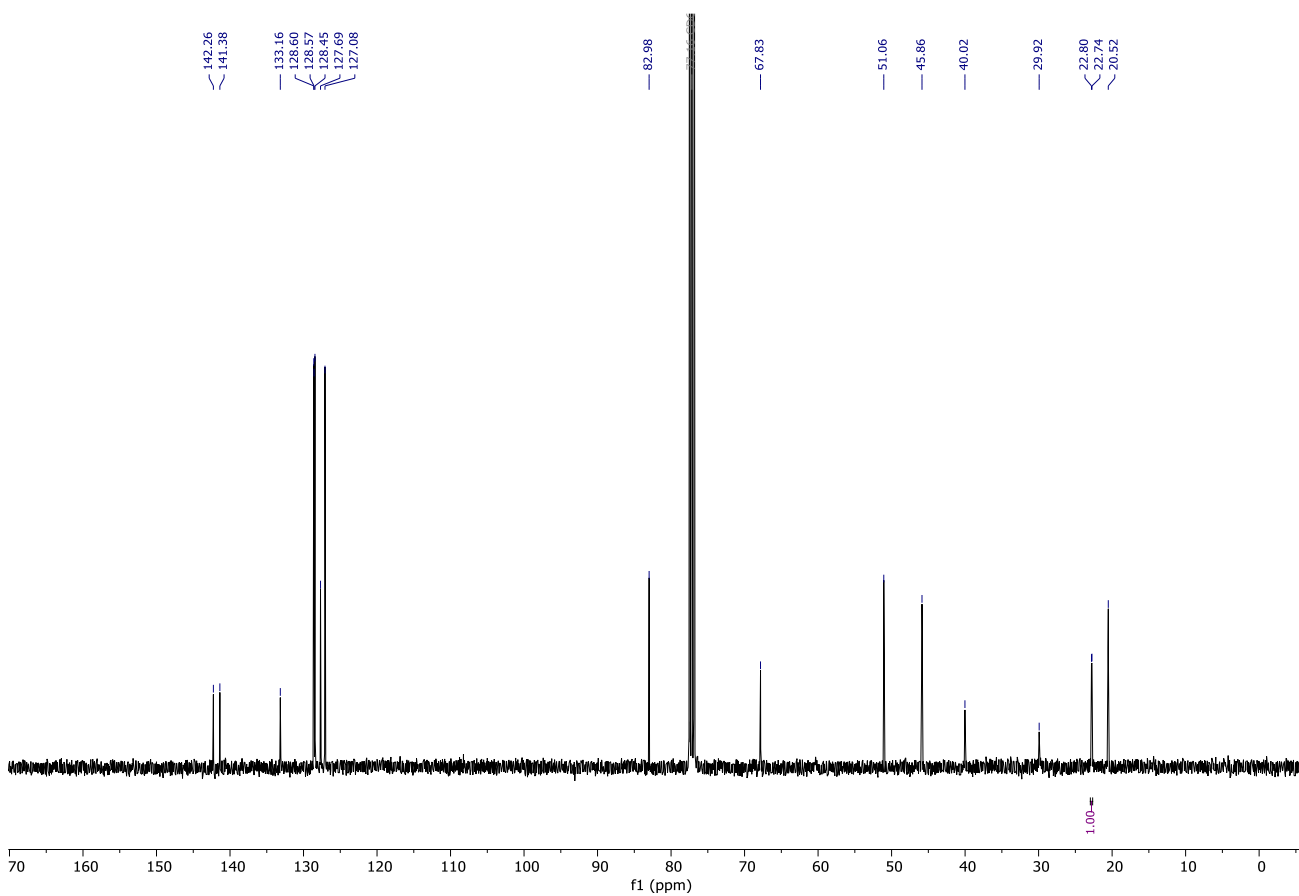

# $^1\text{H}$ and $^{13}\text{C}$ NMR Spectra for **38o**

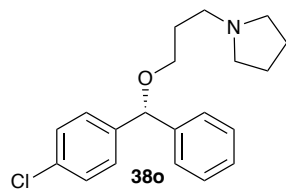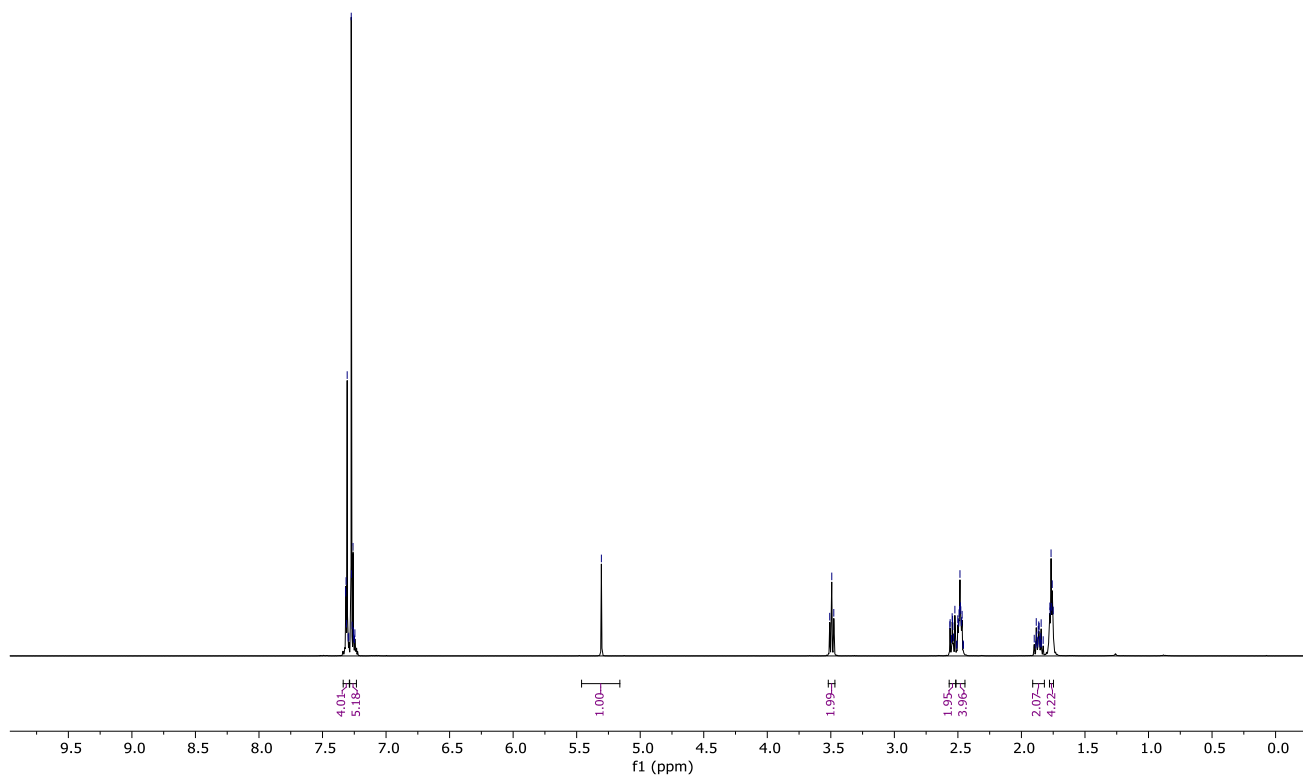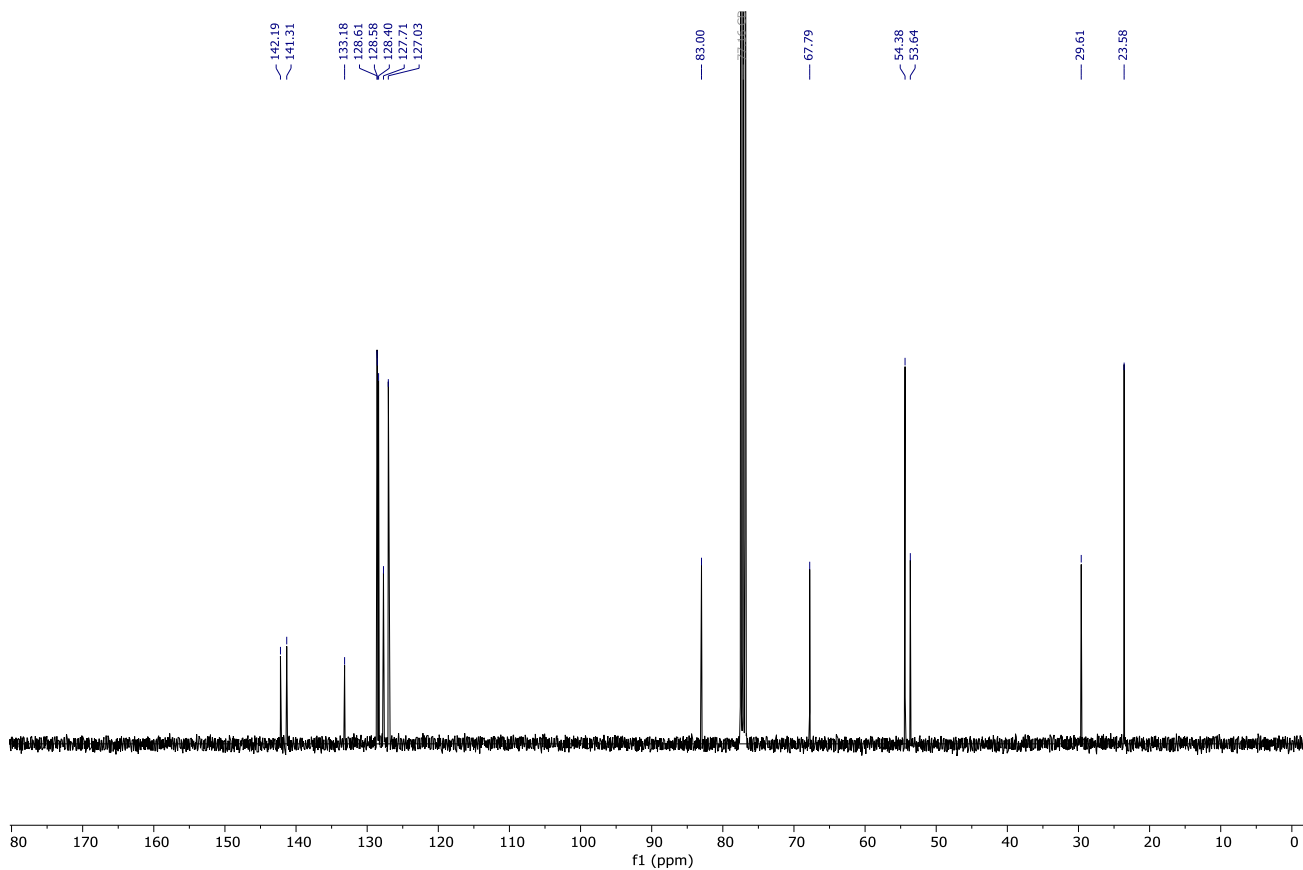

<sup>1</sup>H and <sup>13</sup>C NMR Spectra for S1

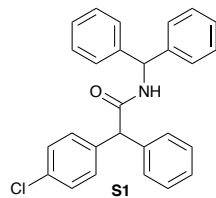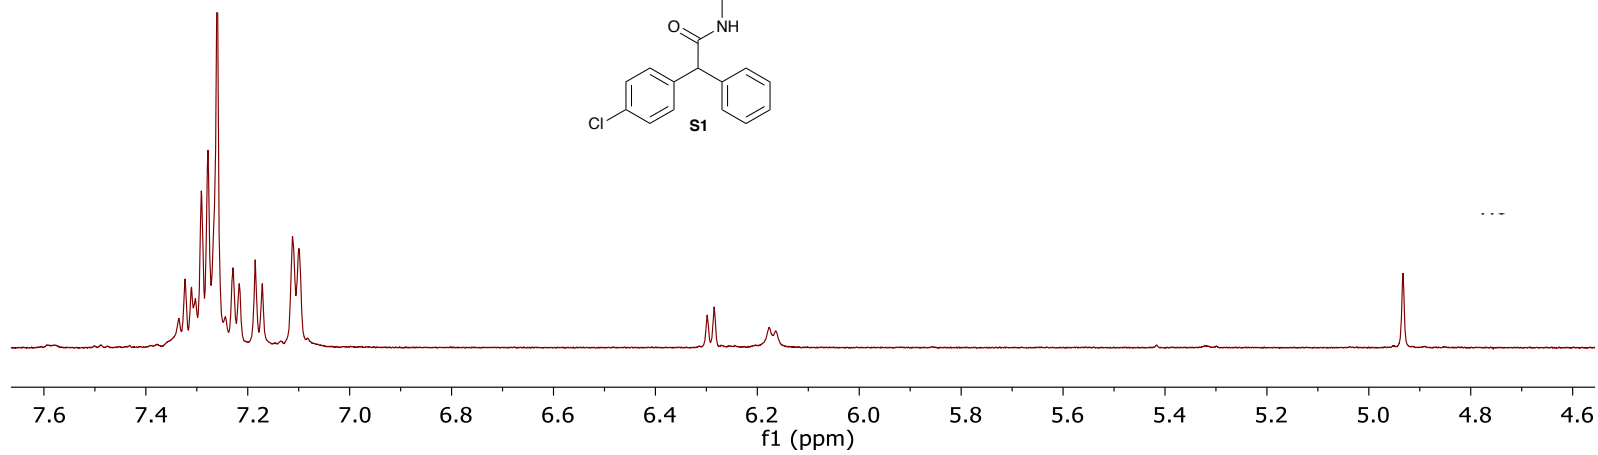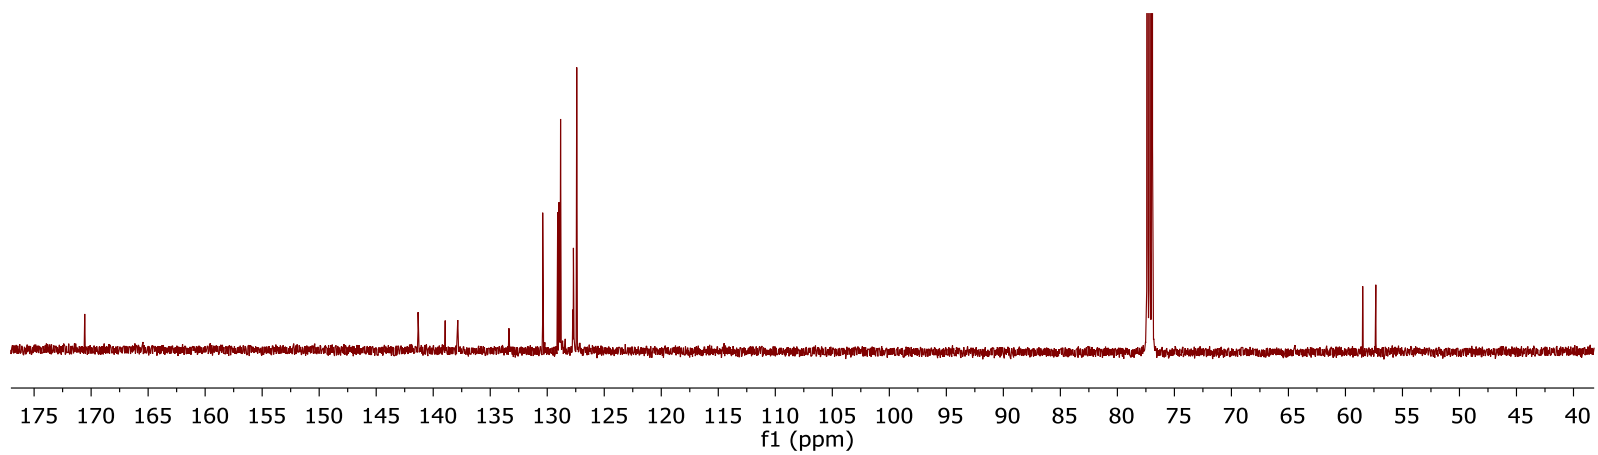



# <sup>1</sup>H and <sup>13</sup>C NMR Spectra for S2

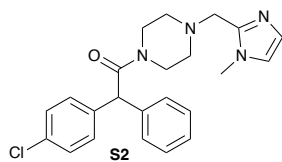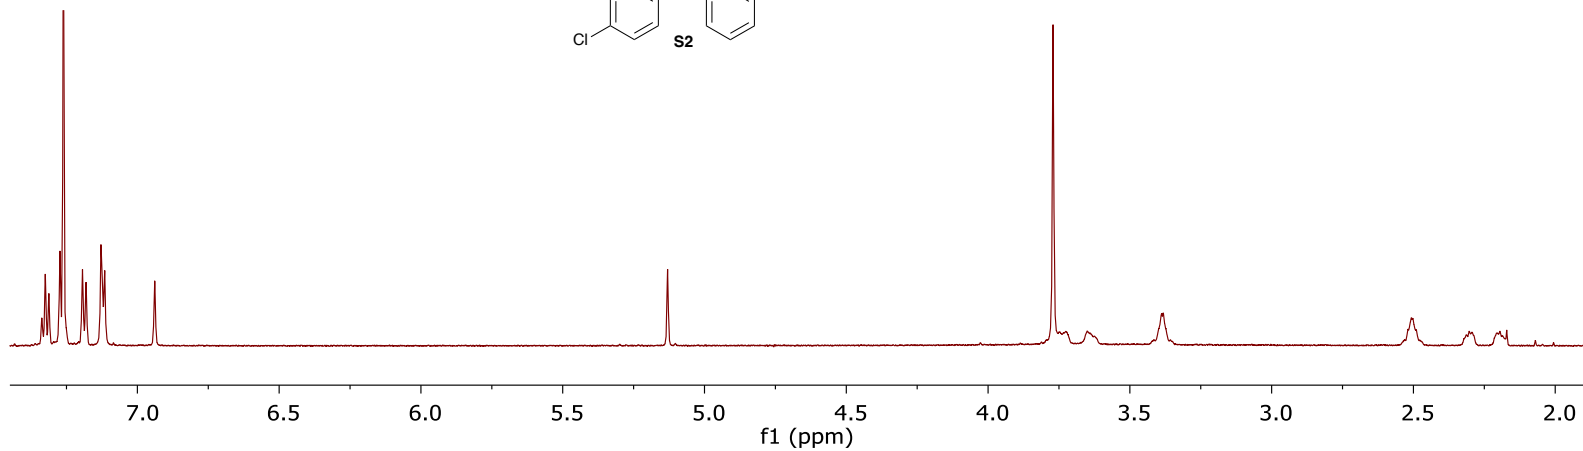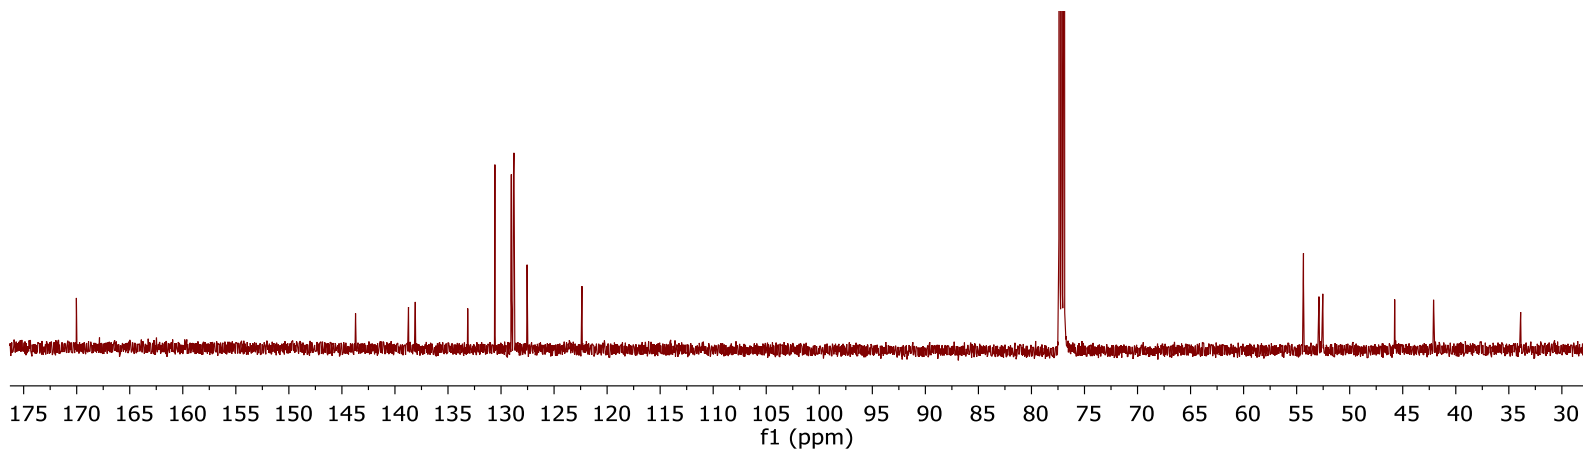

$^1\text{H}$  and  $^{13}\text{C}$  NMR Spectra for **S3**

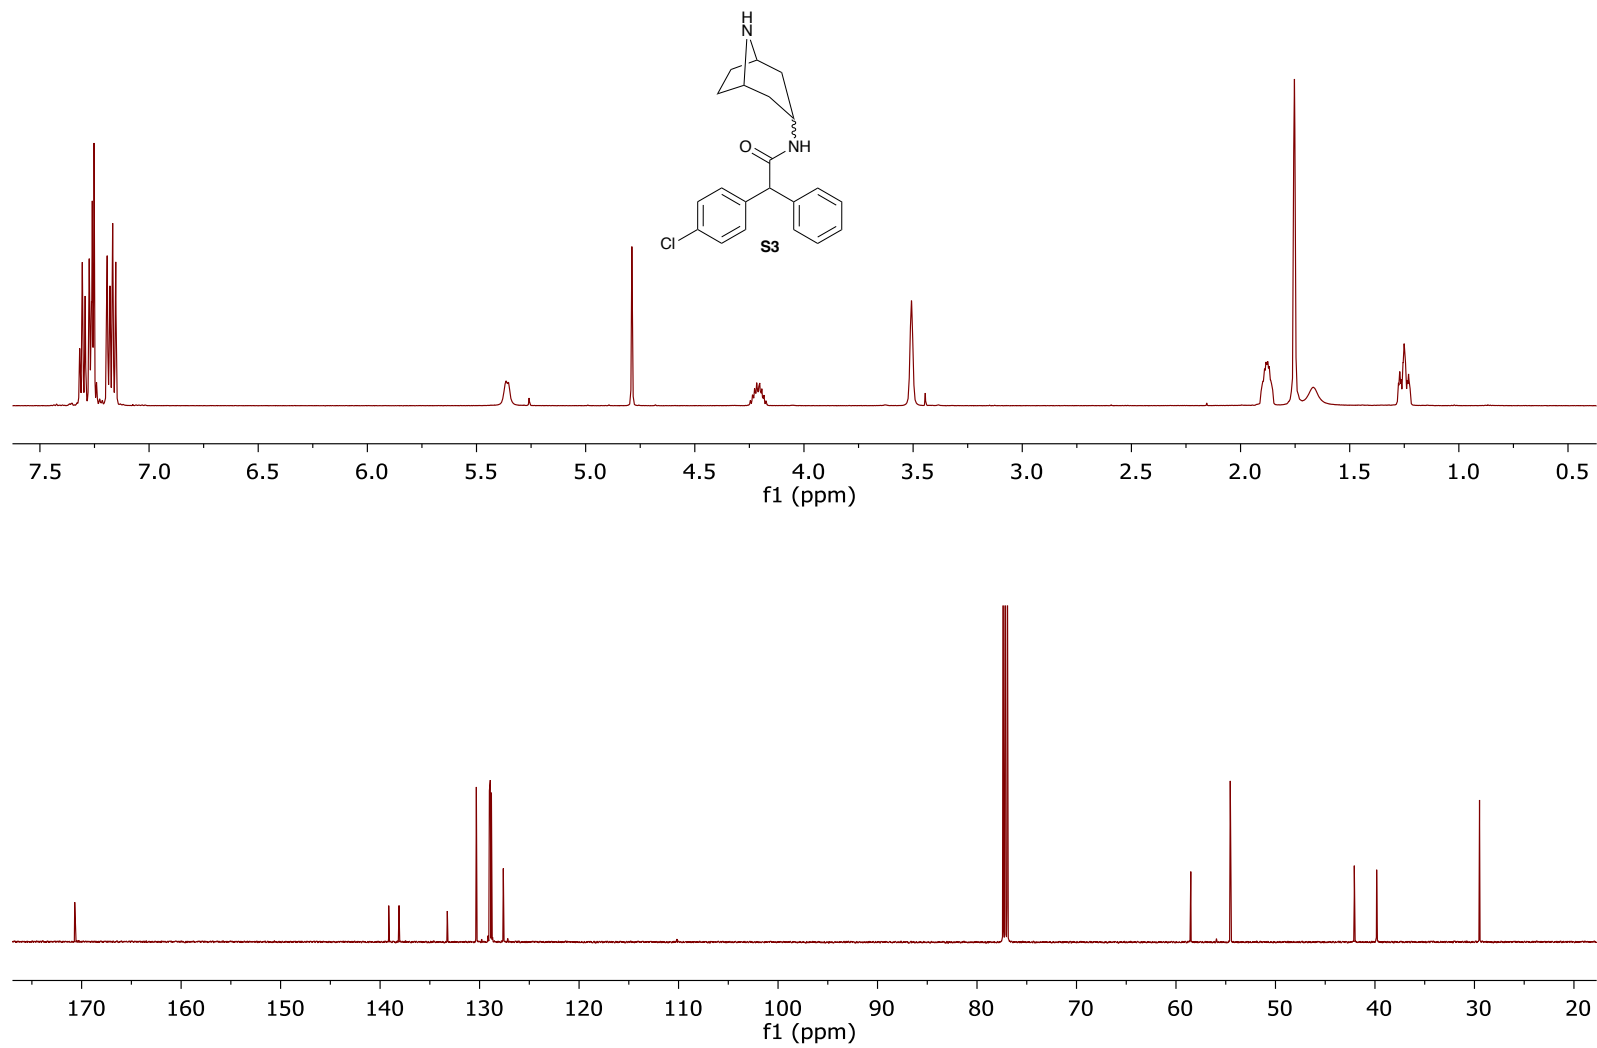

$^1\text{H}$  and  $^{13}\text{C}$  NMR Spectra for **24**

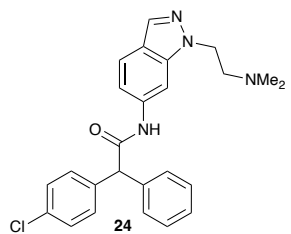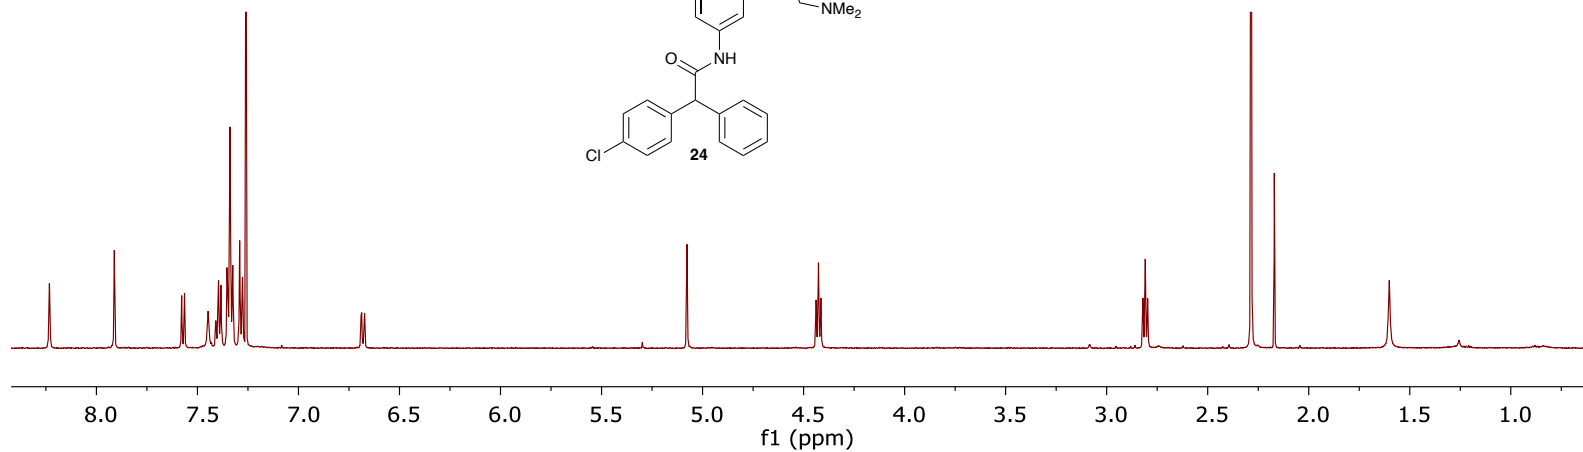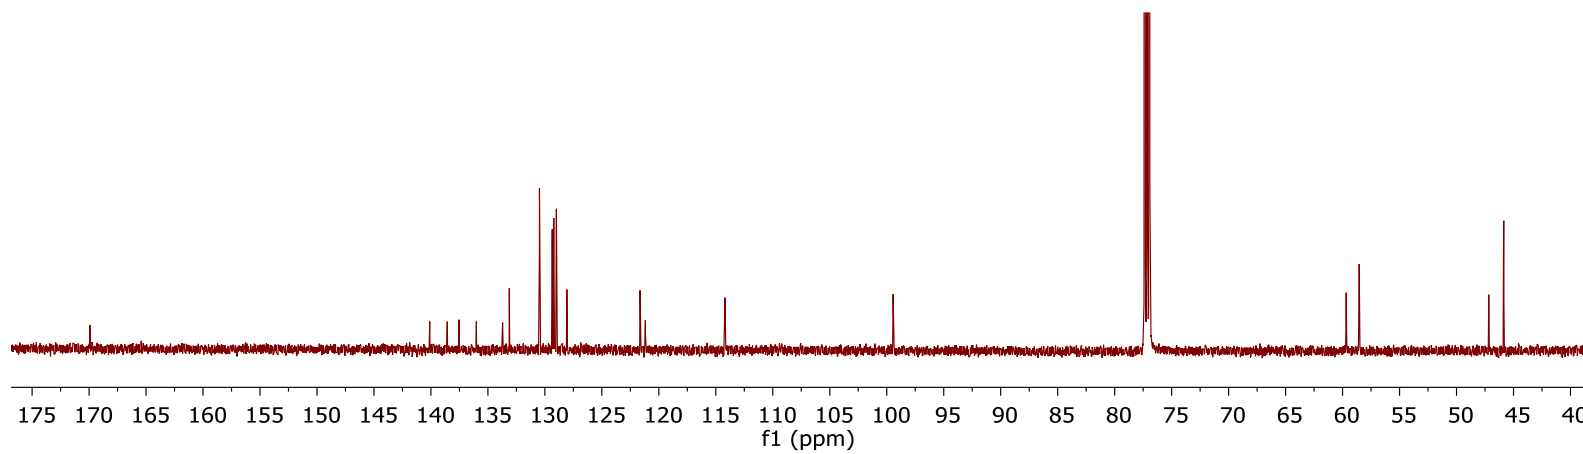

# $^1\text{H}$ and $^{13}\text{C}$ NMR Spectra for S4

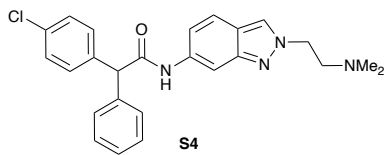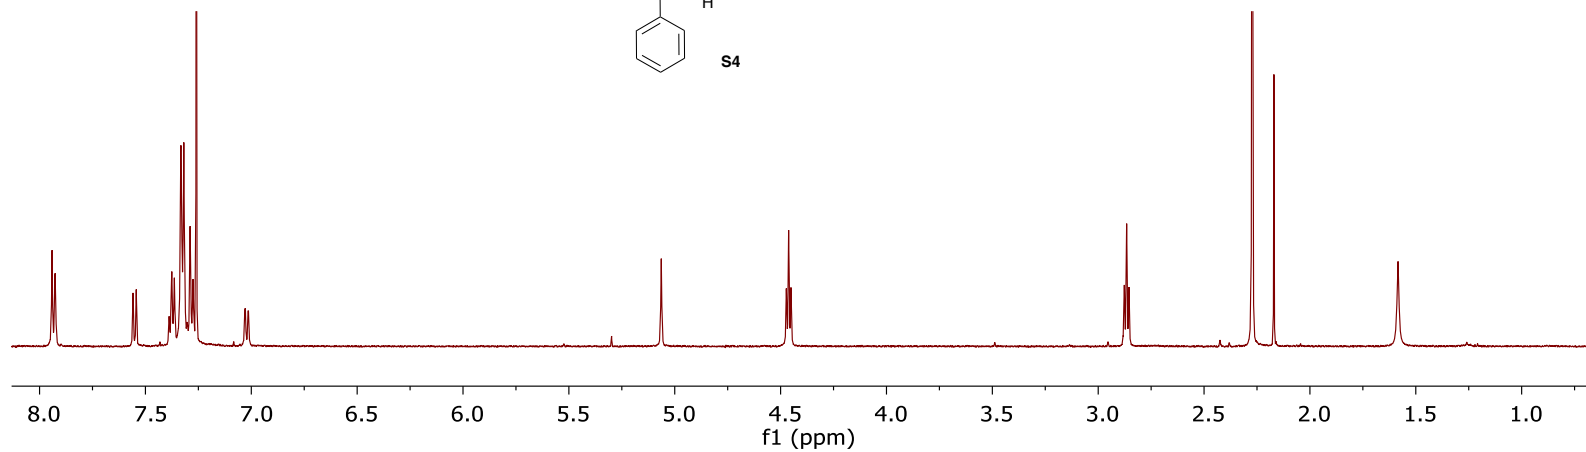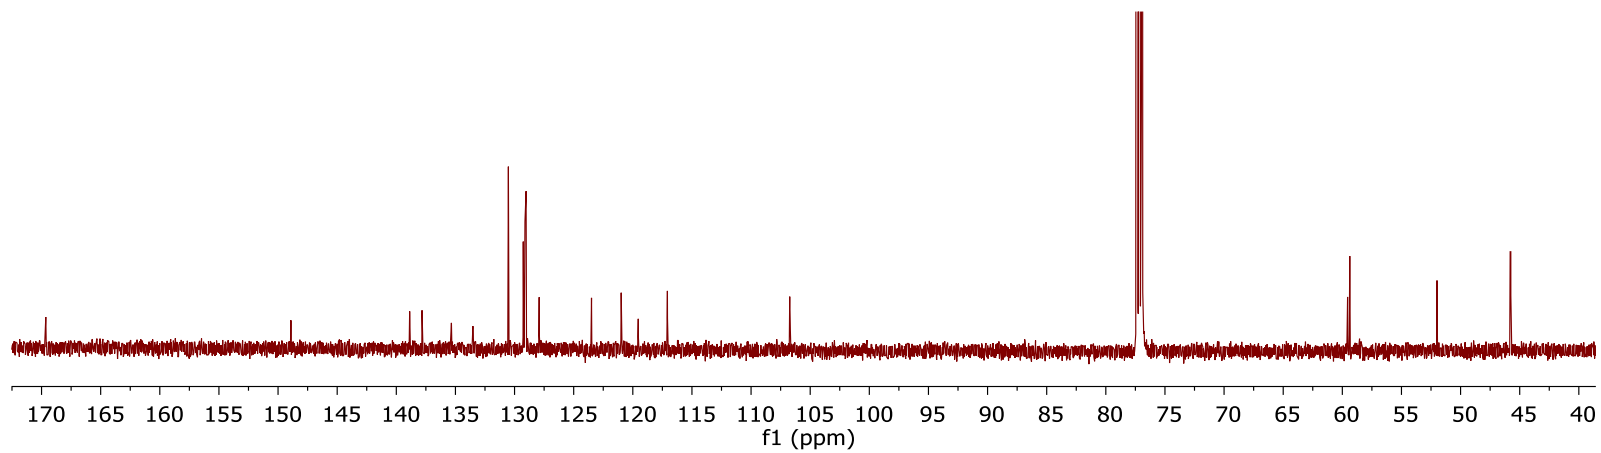

$^1\text{H}$  and  $^{13}\text{C}$  NMR Spectra for S5

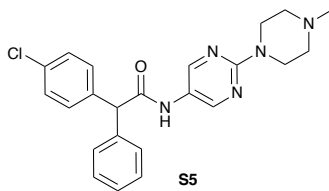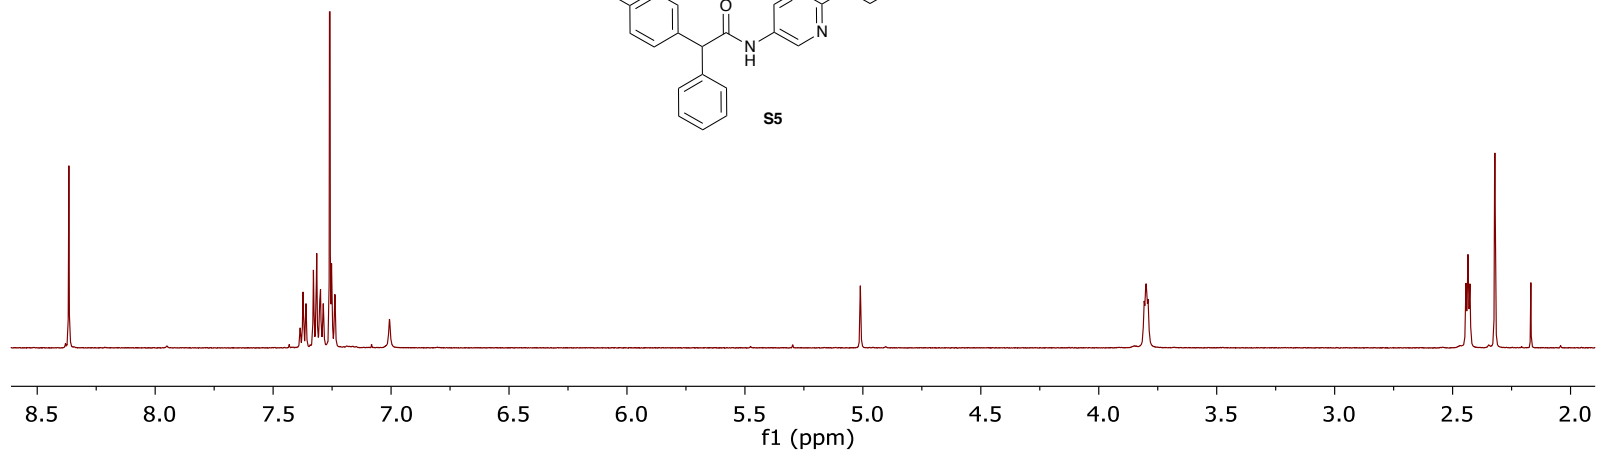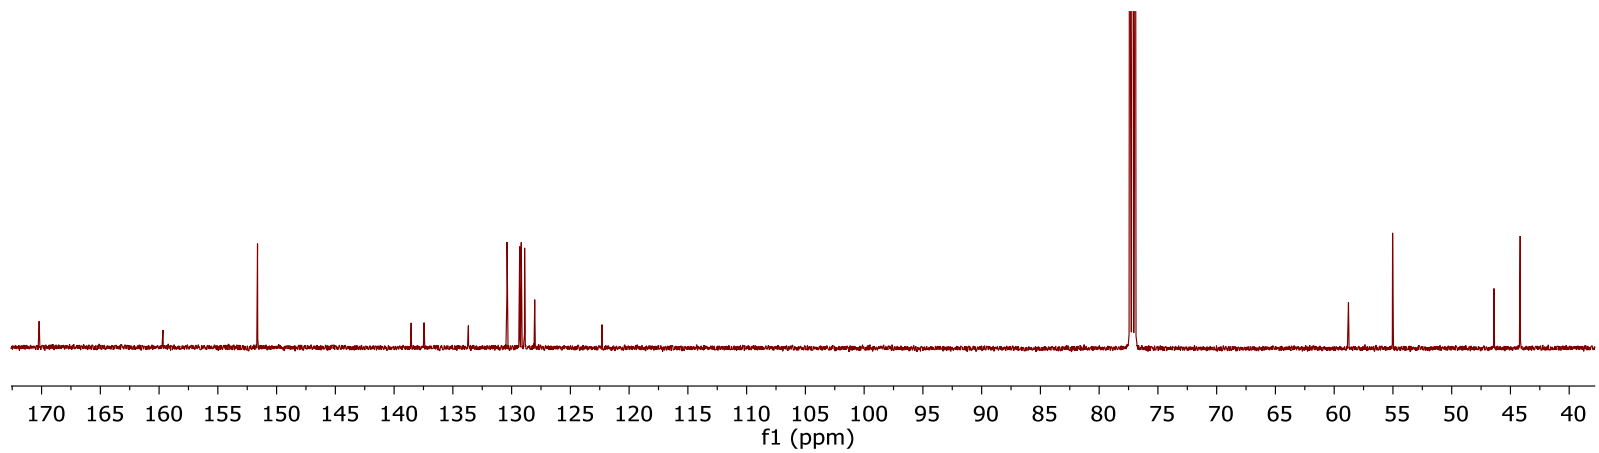

$^1\text{H}$  and  $^{13}\text{C}$  NMR Spectra for **S6**

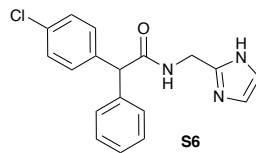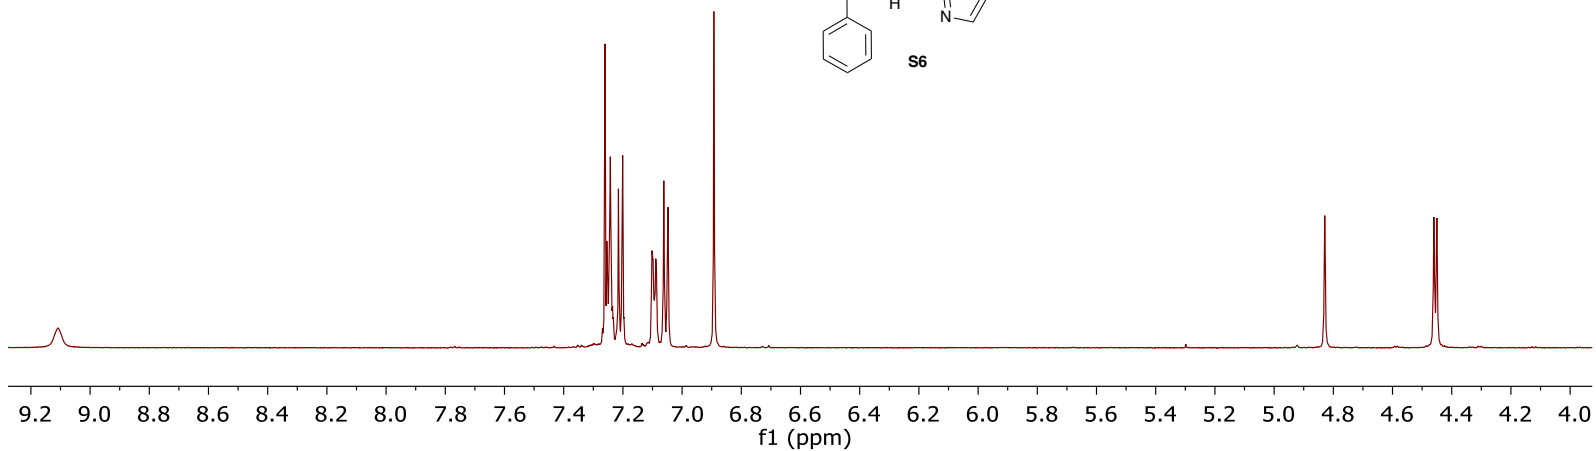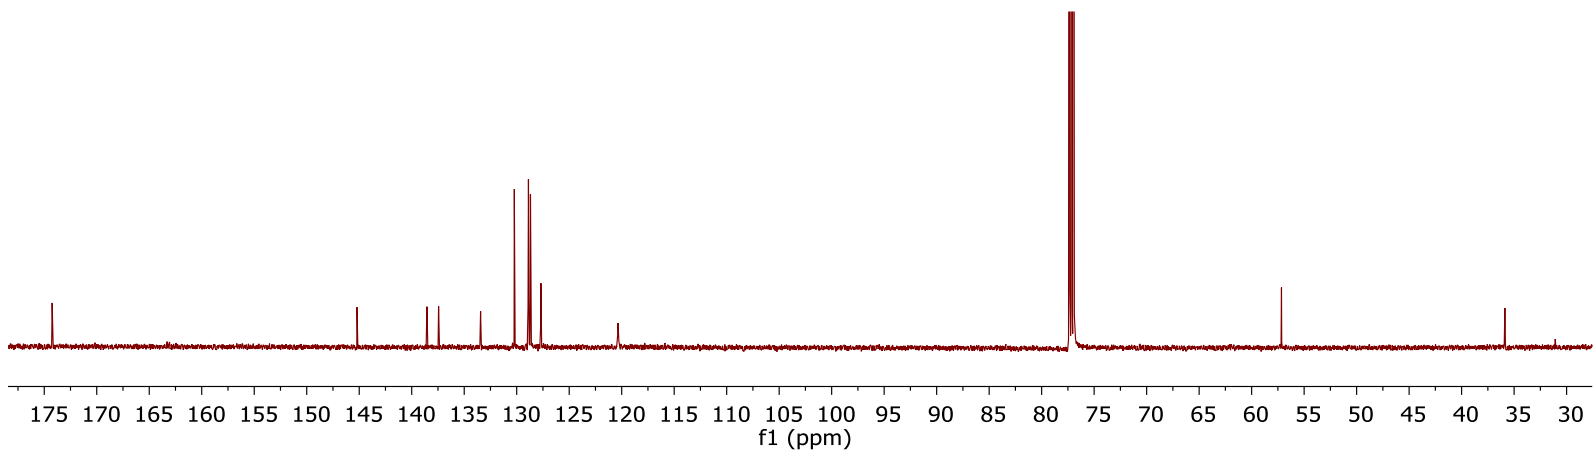

# $^1\text{H}$ and $^{13}\text{C}$ NMR Spectra for **S7**

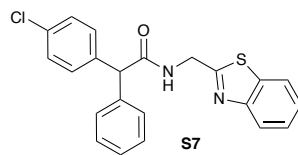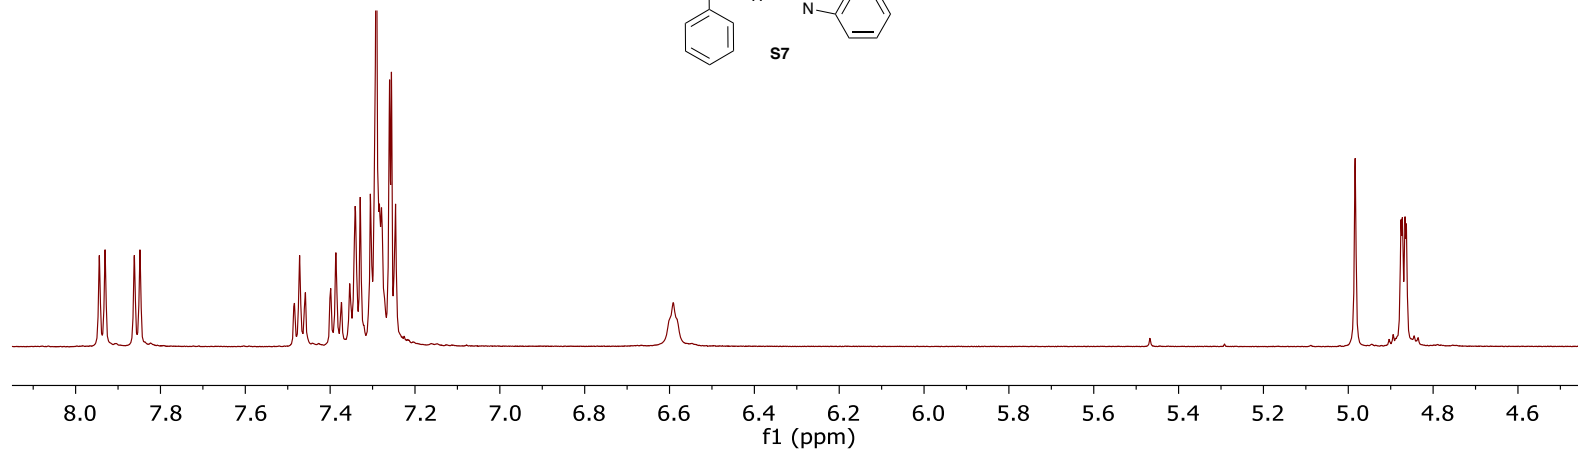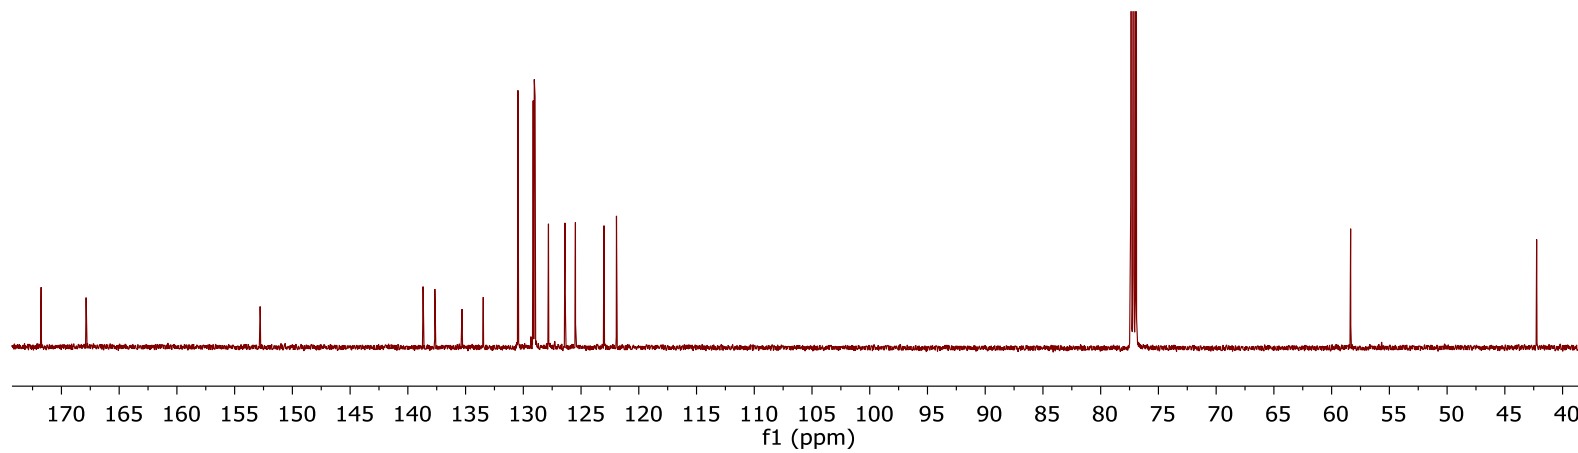

# <sup>1</sup>H and <sup>13</sup>C NMR Spectra for S8

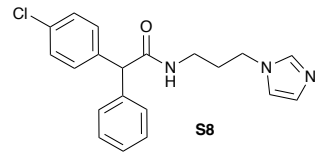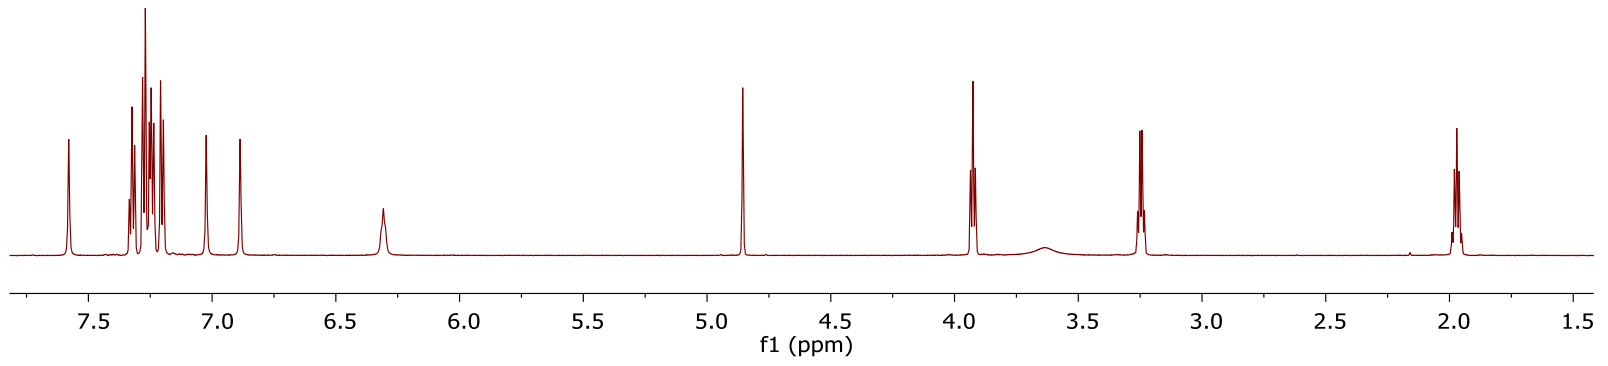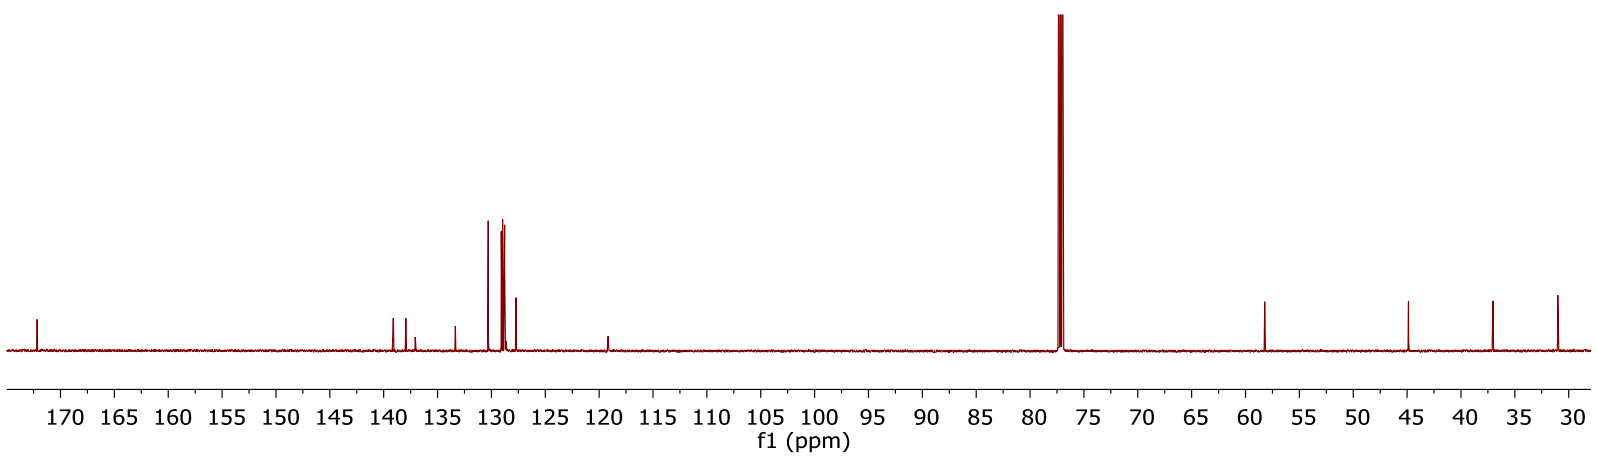



$^1\text{H}$  and  $^{13}\text{C}$  NMR Spectra for **S9**

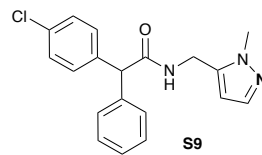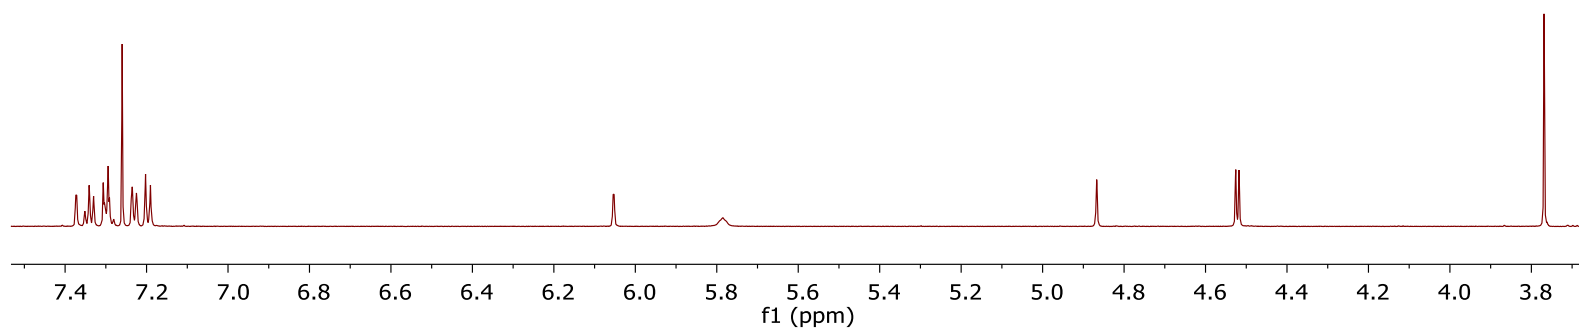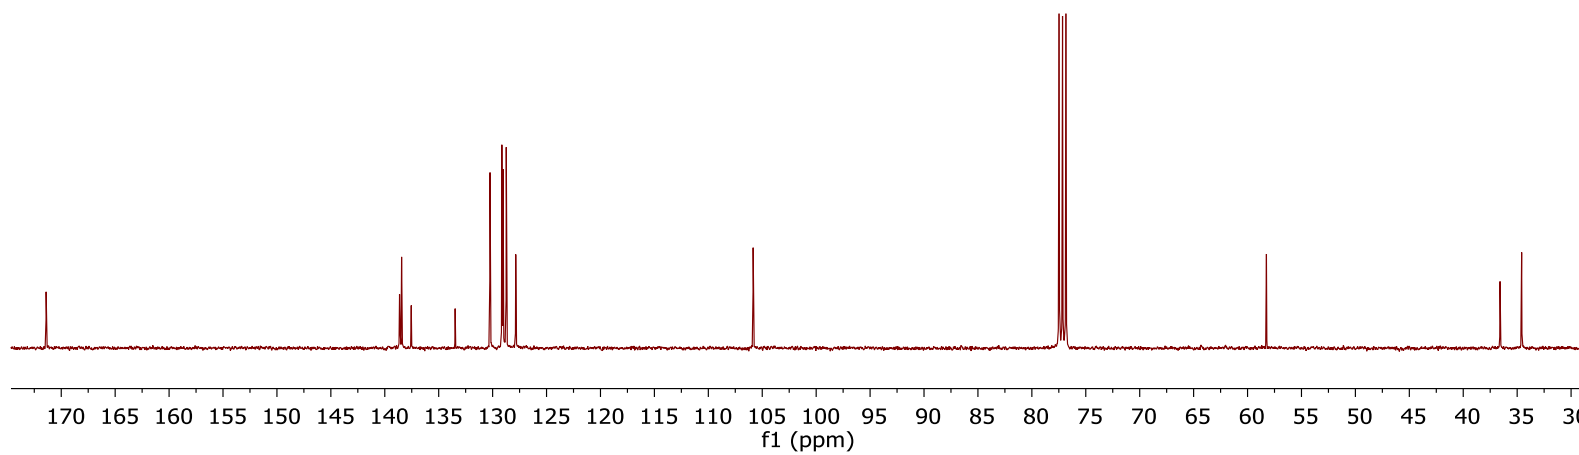

# $^1\text{H}$ and $^{13}\text{C}$ NMR Spectra for **S10**

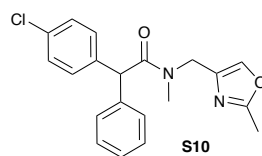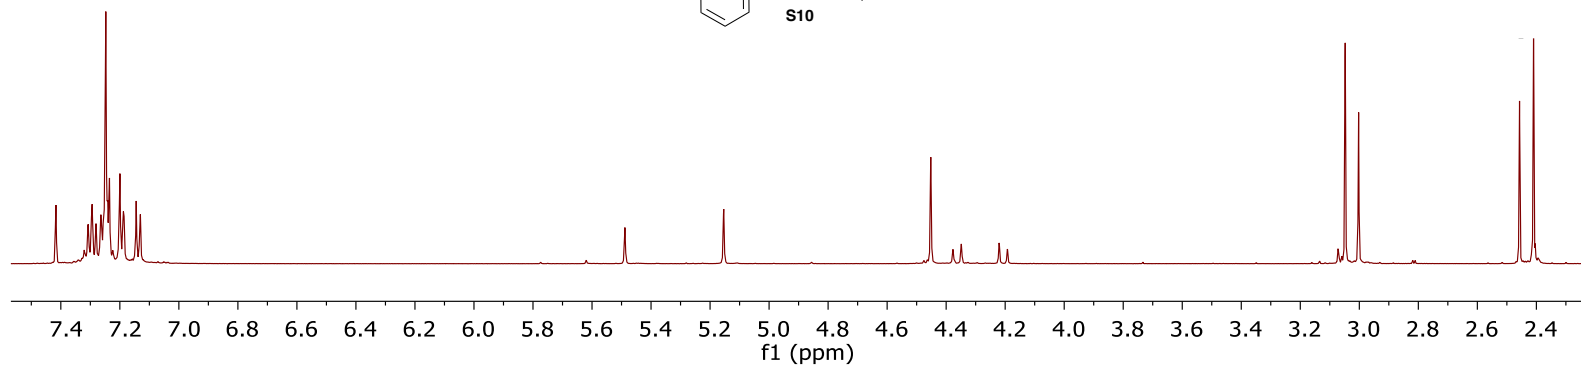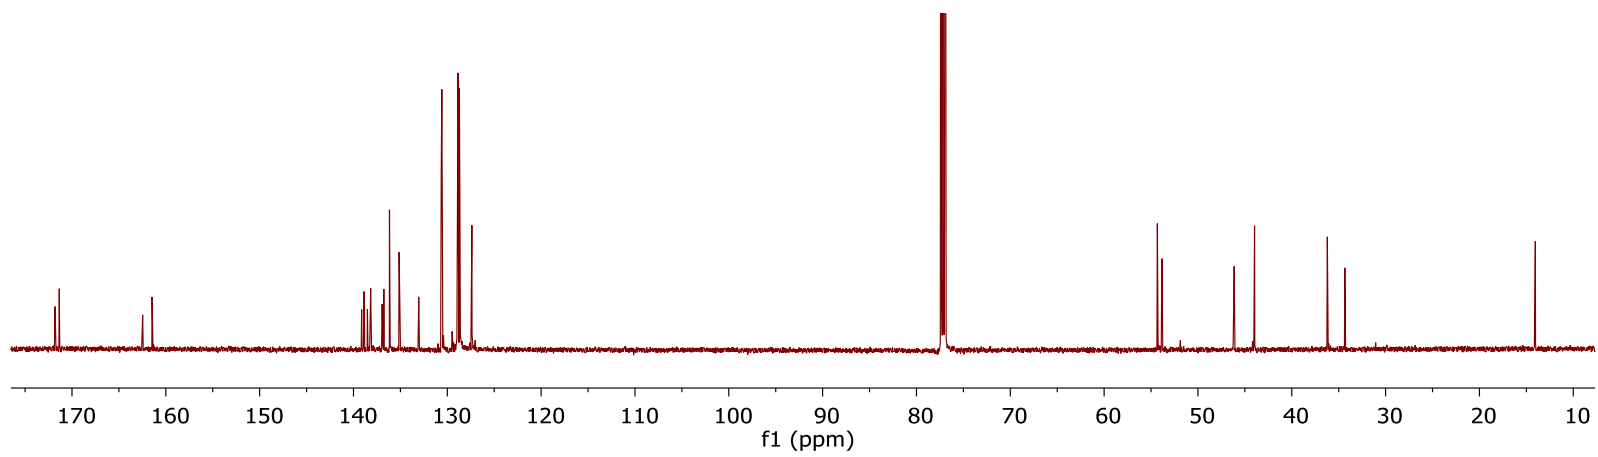

<sup>1</sup>H and <sup>13</sup>C NMR Spectra for **S11**

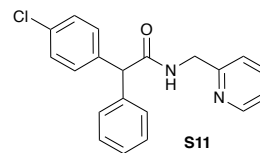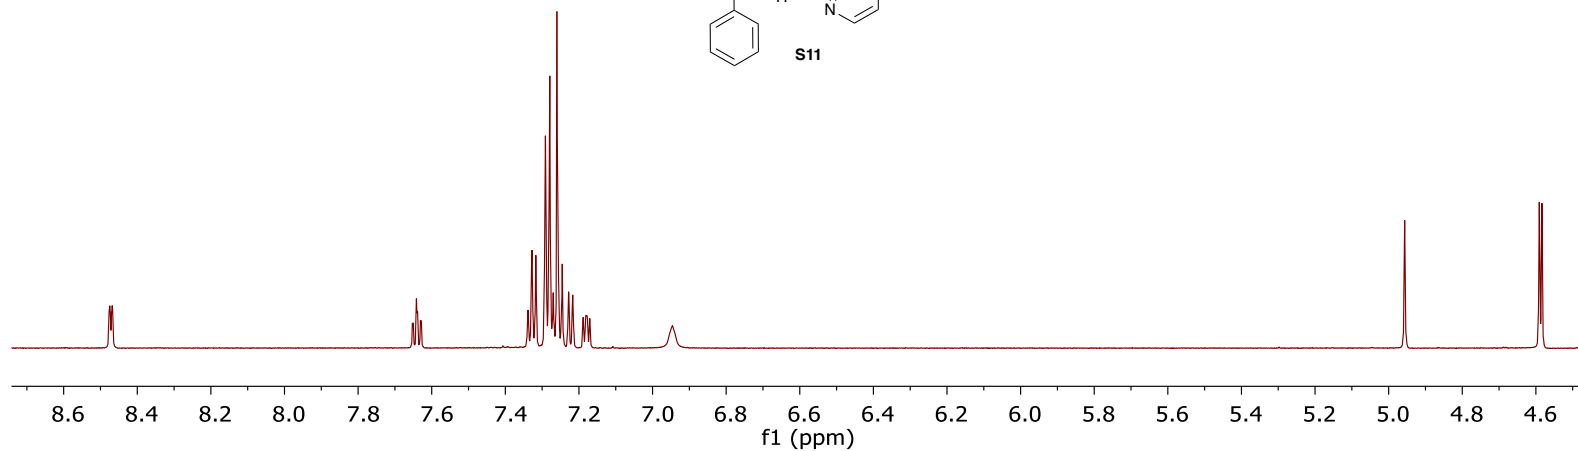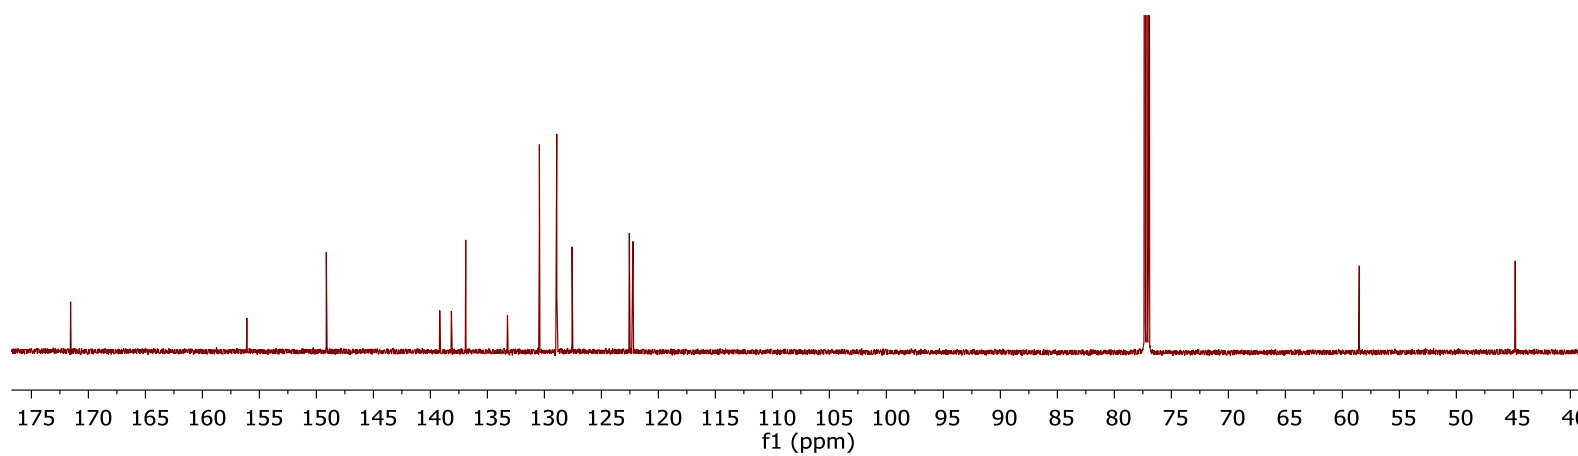

# $^1\text{H}$ and $^{13}\text{C}$ NMR Spectra for **S12**

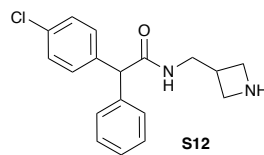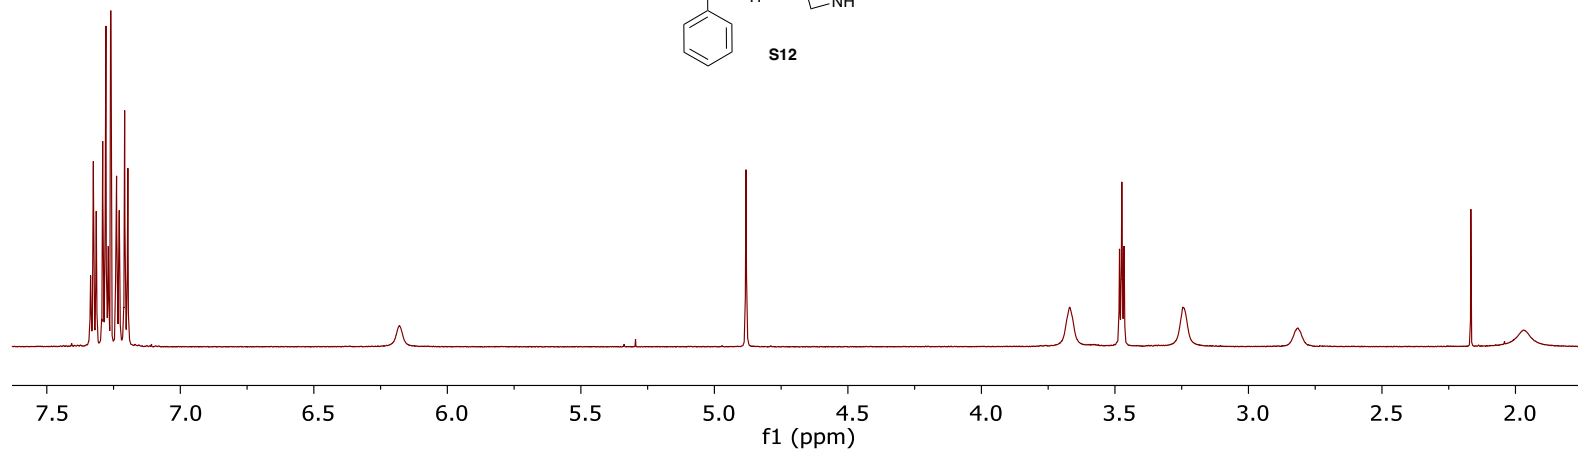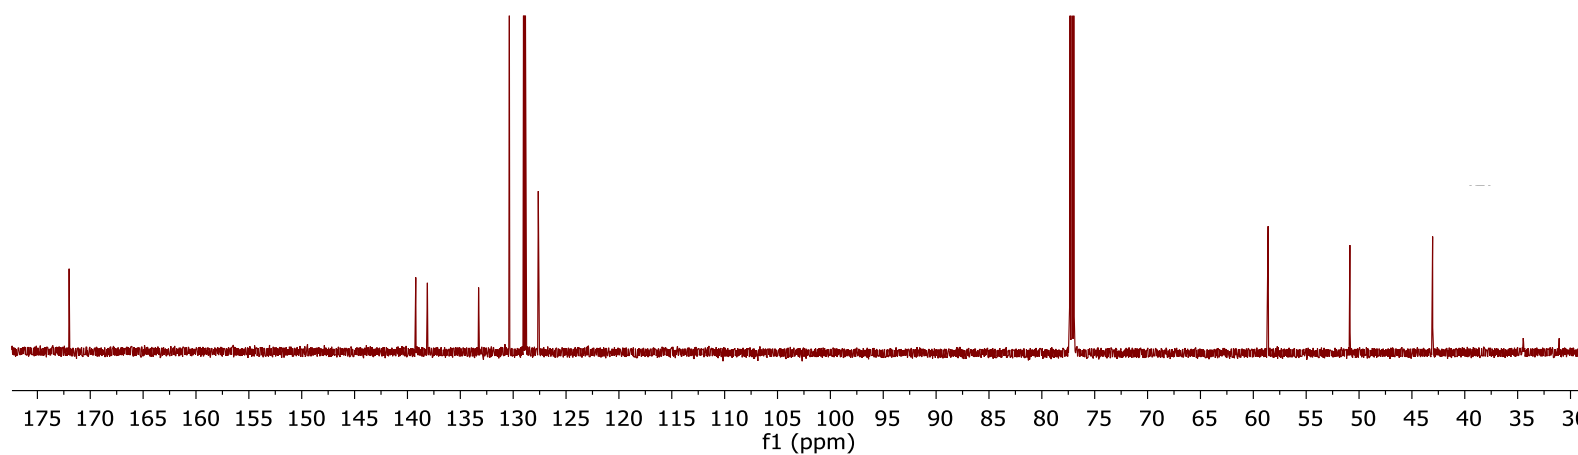

# $^1\text{H}$ and $^{13}\text{C}$ NMR Spectra for S13

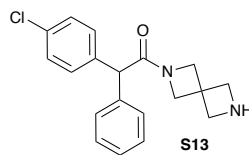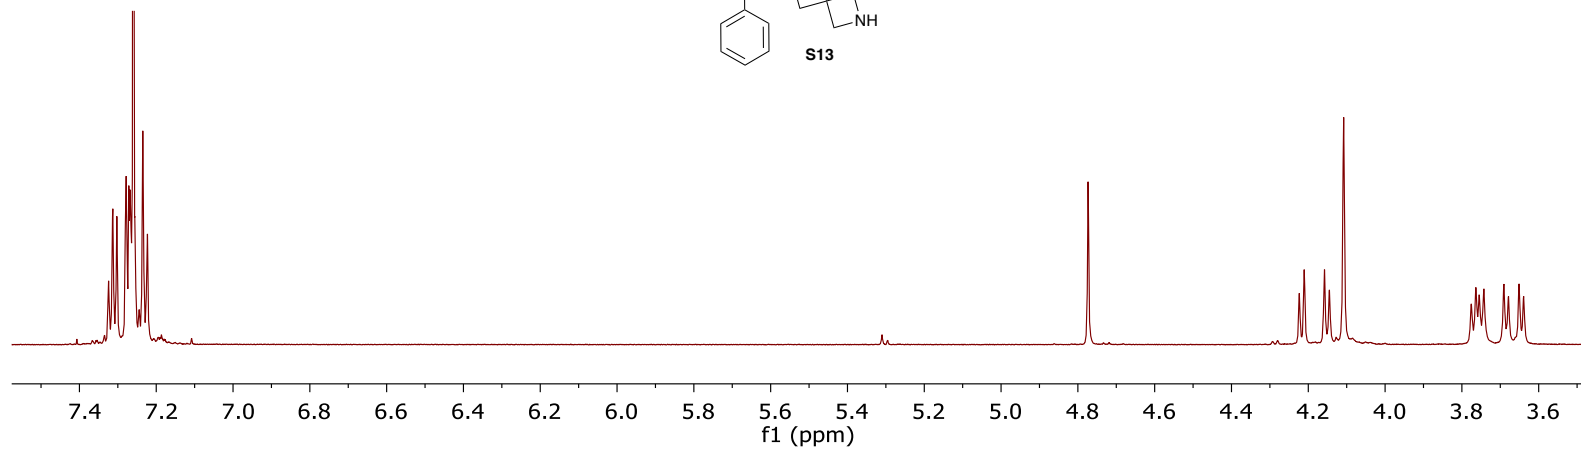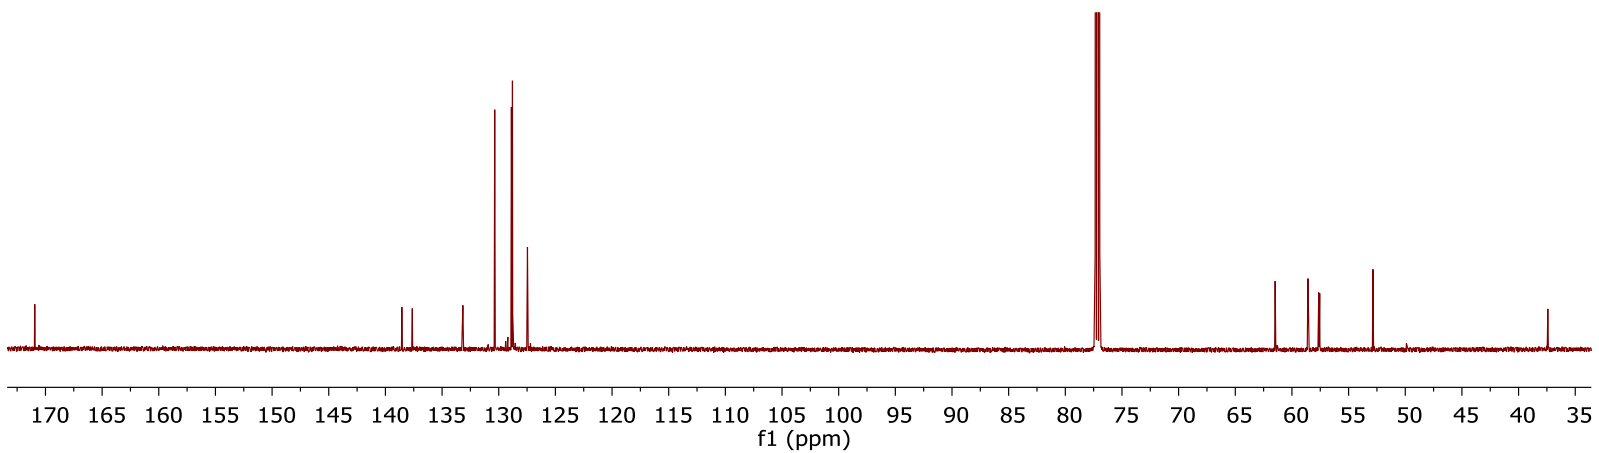

# $^1\text{H}$ and $^{13}\text{C}$ NMR Spectra for S14

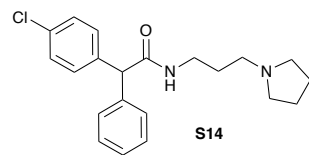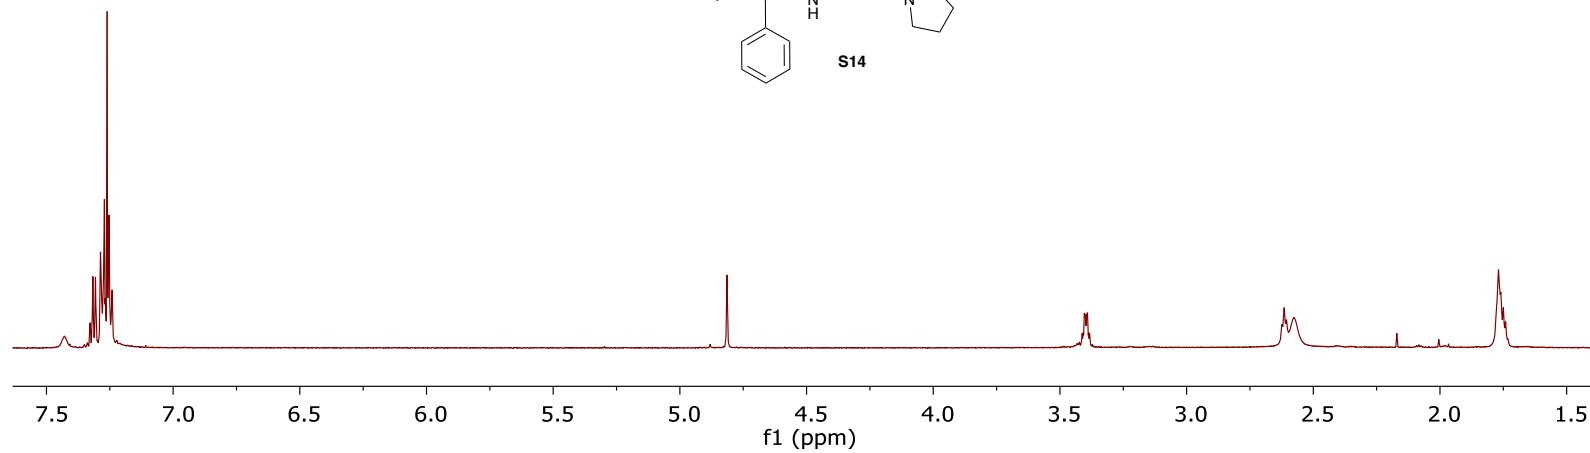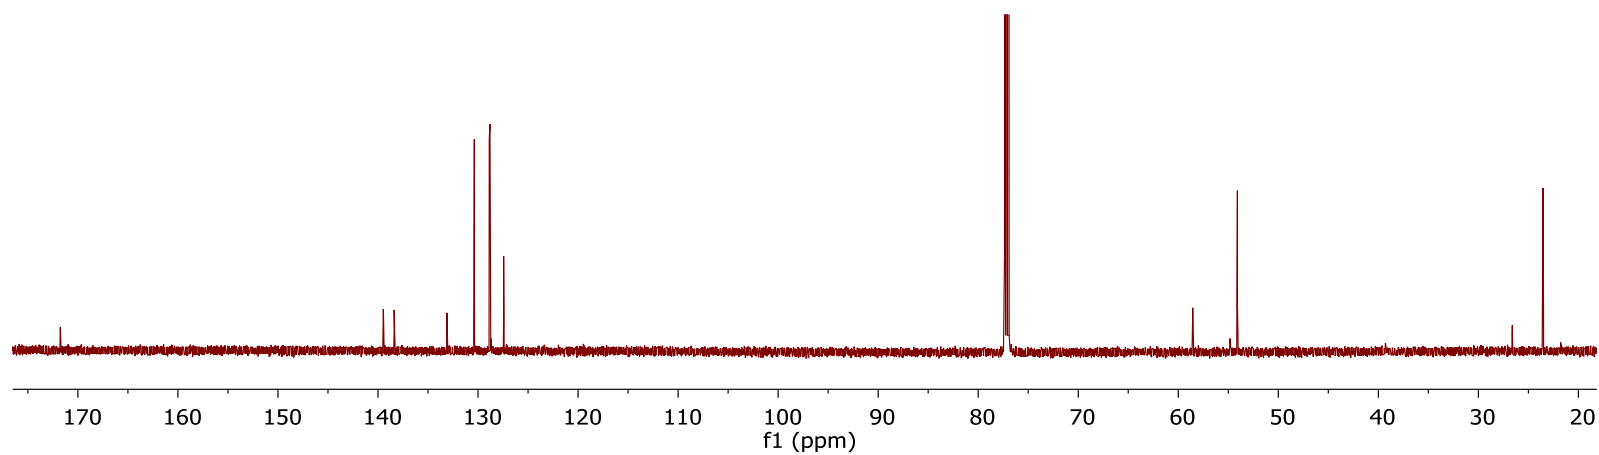

<sup>1</sup>H and <sup>13</sup>C NMR Spectra for **S15**

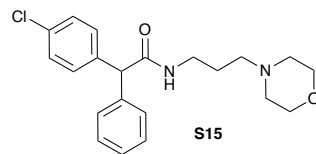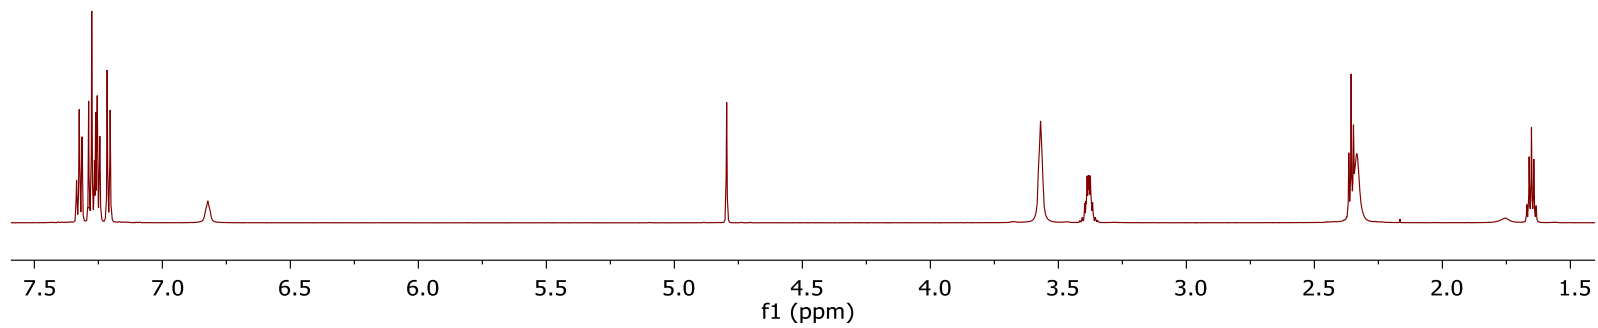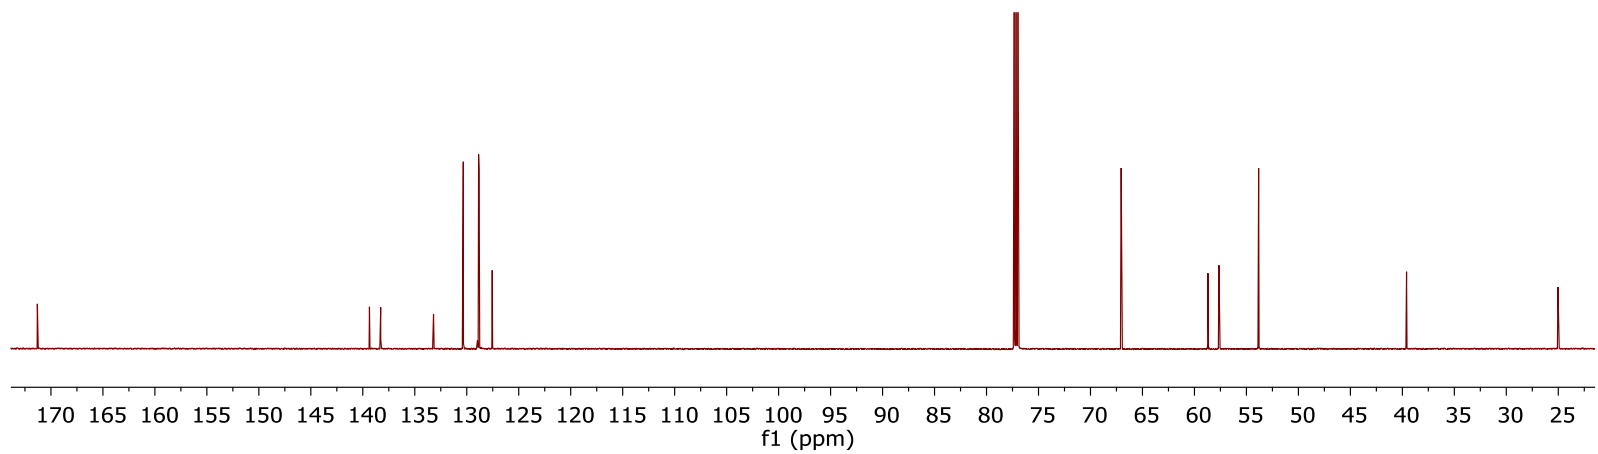

# $^1\text{H}$ and $^{13}\text{C}$ NMR Spectra for S16

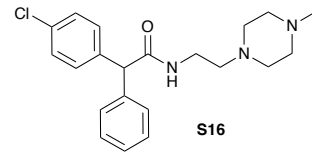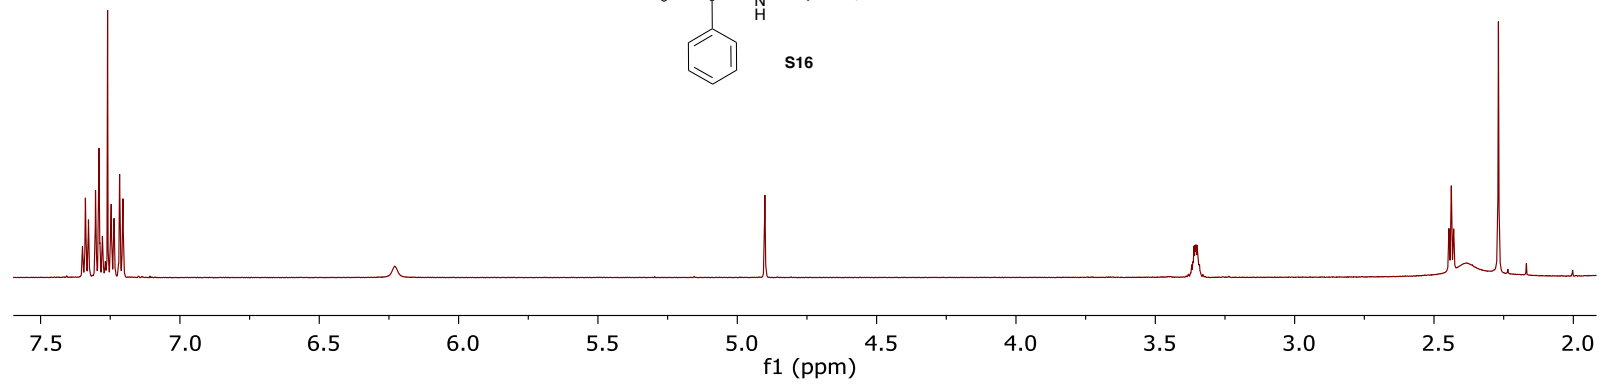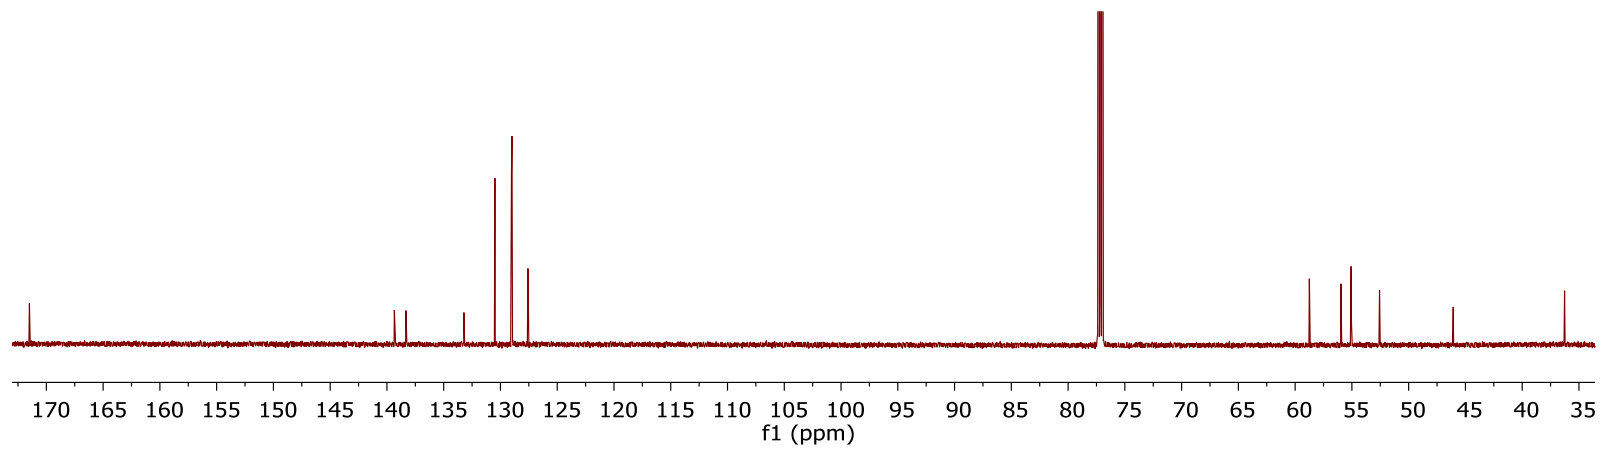



<sup>1</sup>H and <sup>13</sup>C NMR Spectra for S17

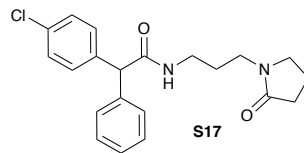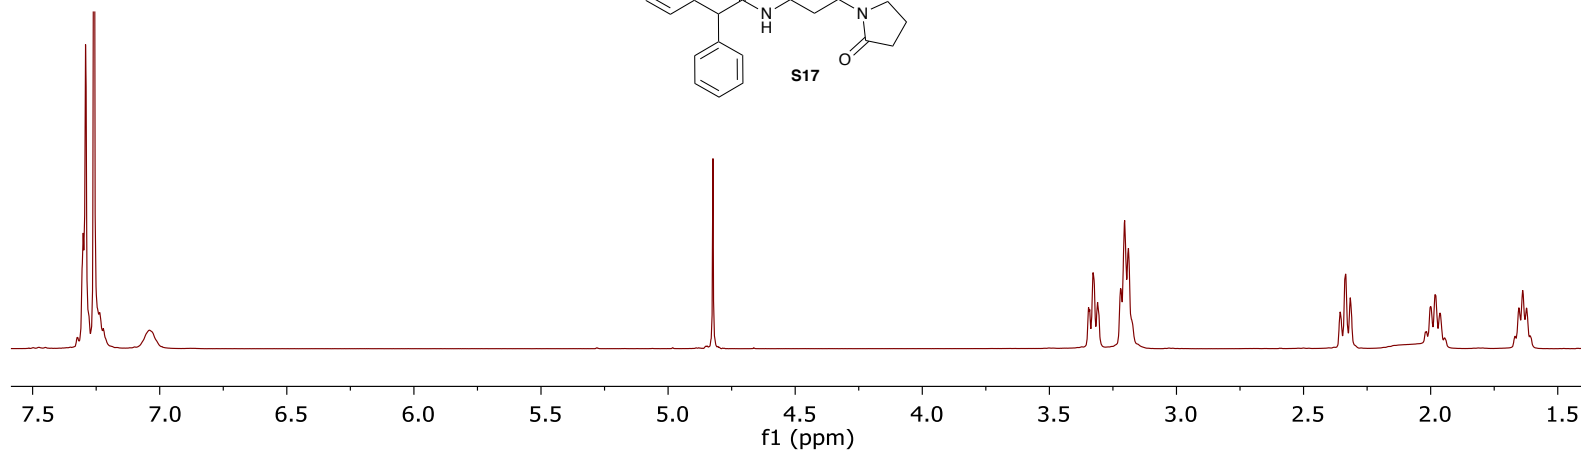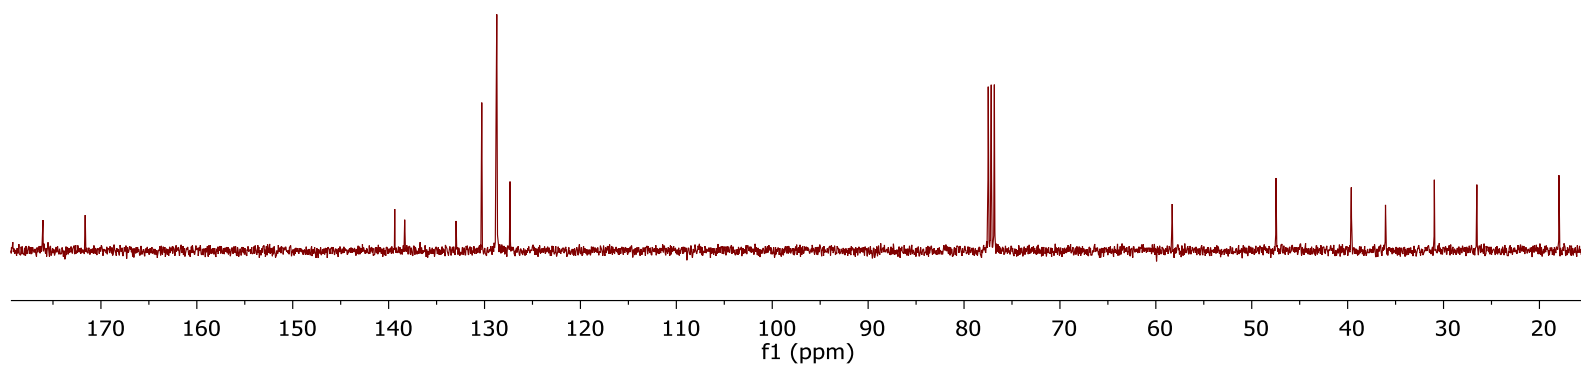

$^1\text{H}$  and  $^{13}\text{C}$  NMR Spectra for **S18**

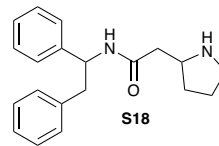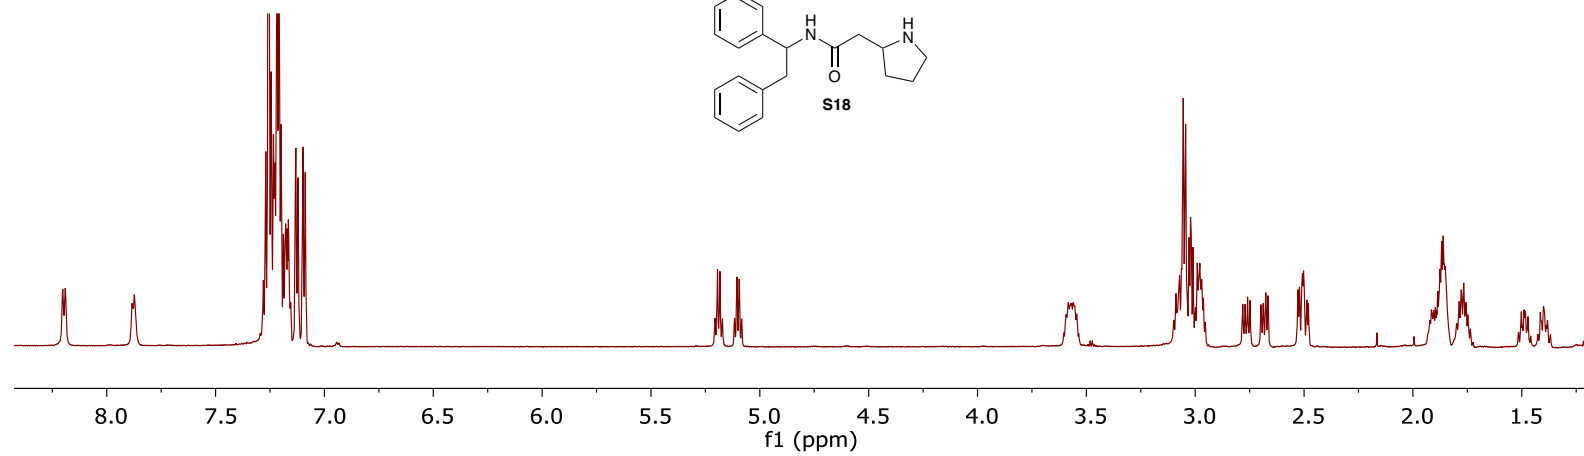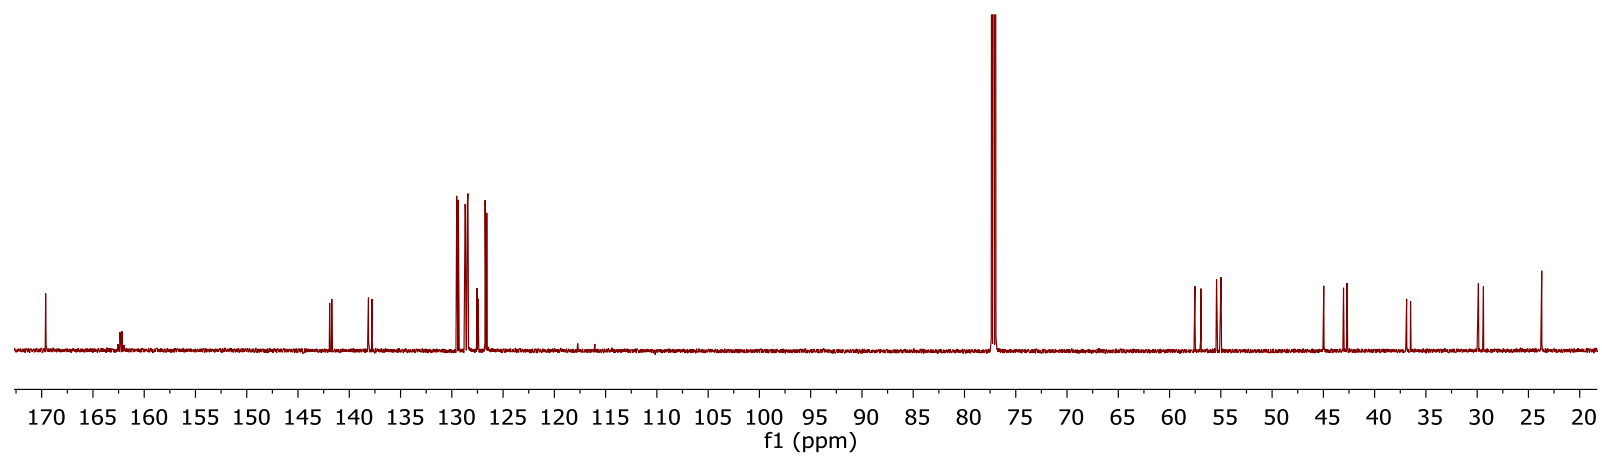

$^1\text{H}$  and  $^{13}\text{C}$  NMR Spectra for **S19**

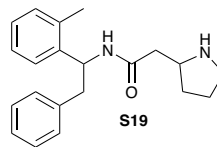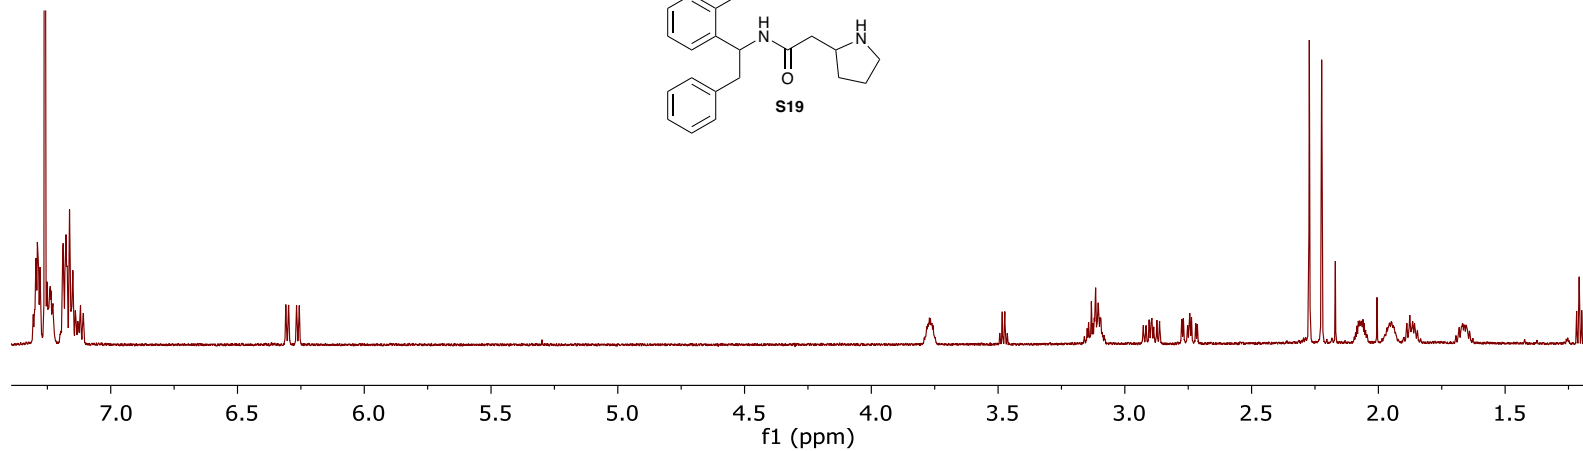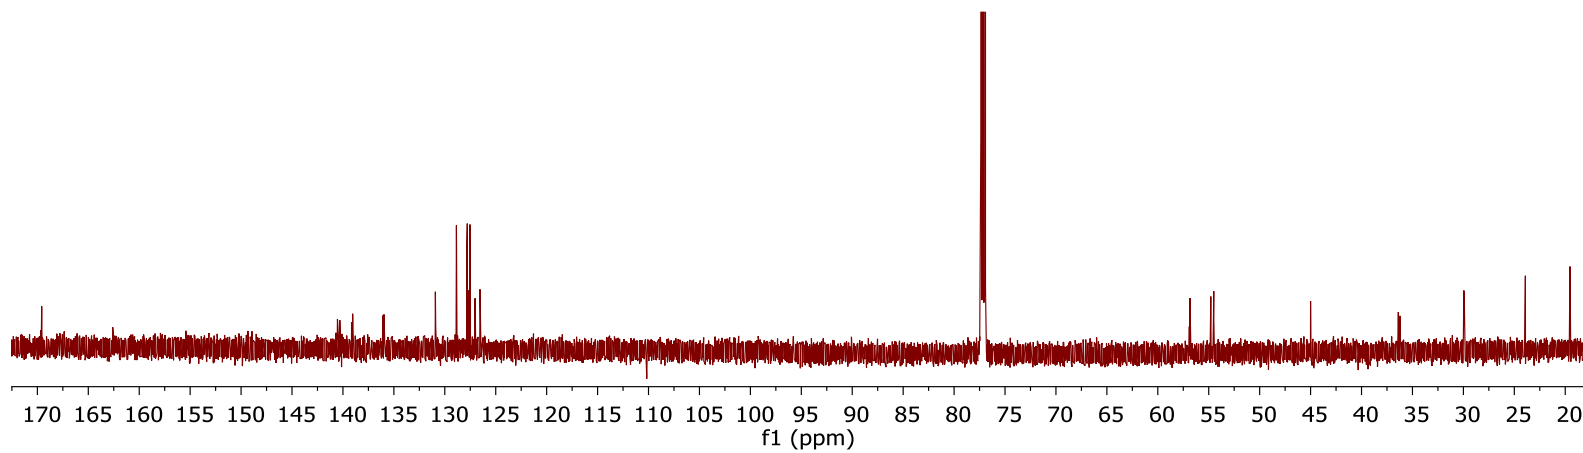

$^1\text{H}$  and  $^{13}\text{C}$  NMR Spectra for **S20**

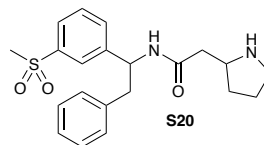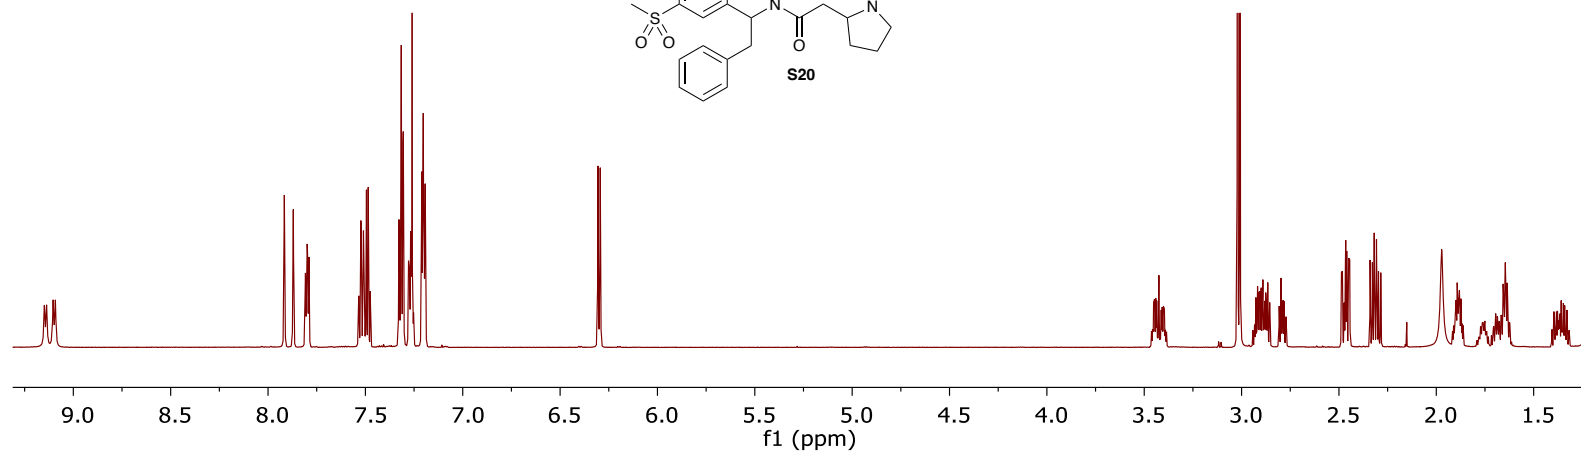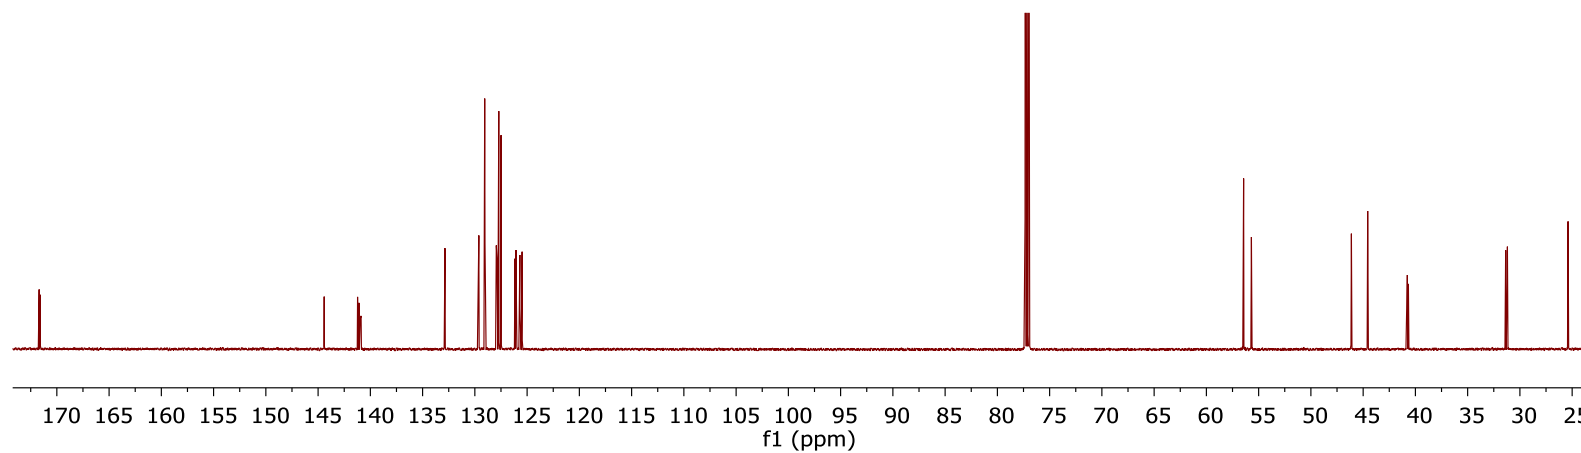

$^1\text{H}$  and  $^{13}\text{C}$  NMR Spectra for **S21**

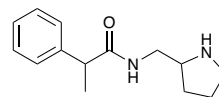

**S21**

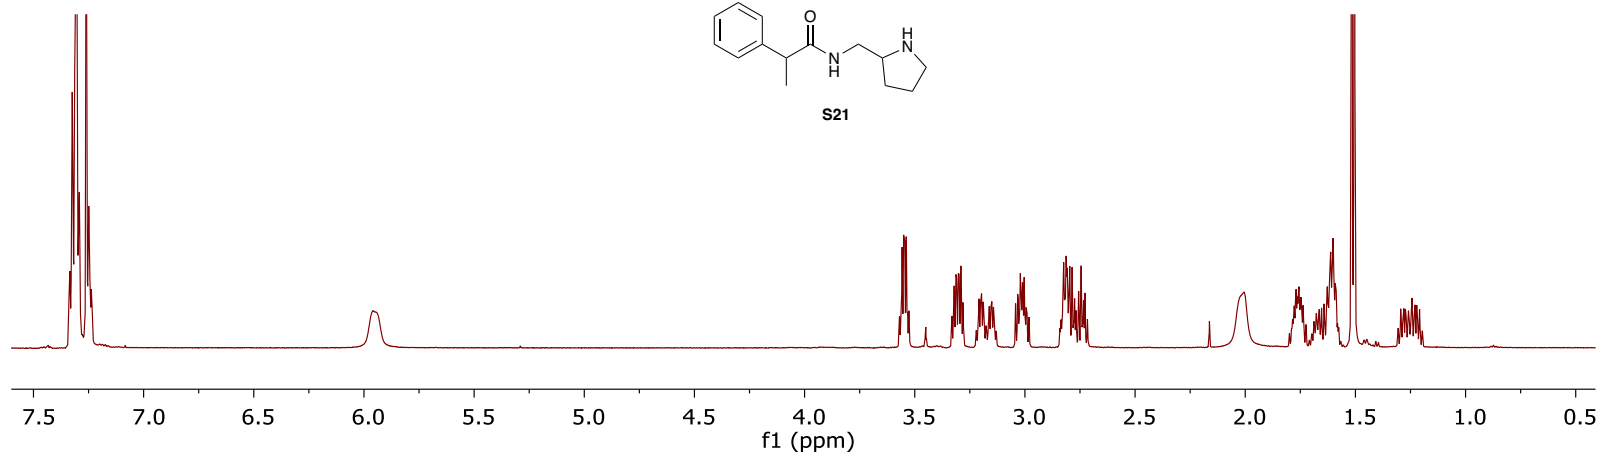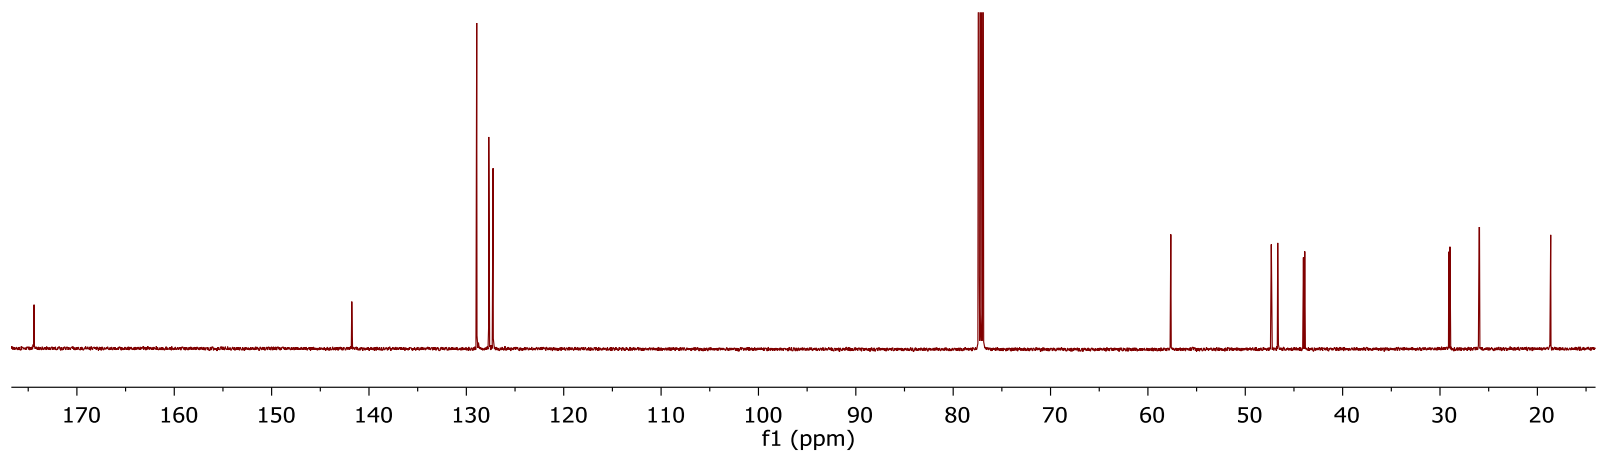



$^1\text{H}$  and  $^{13}\text{C}$  NMR Spectra for **S24**

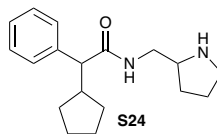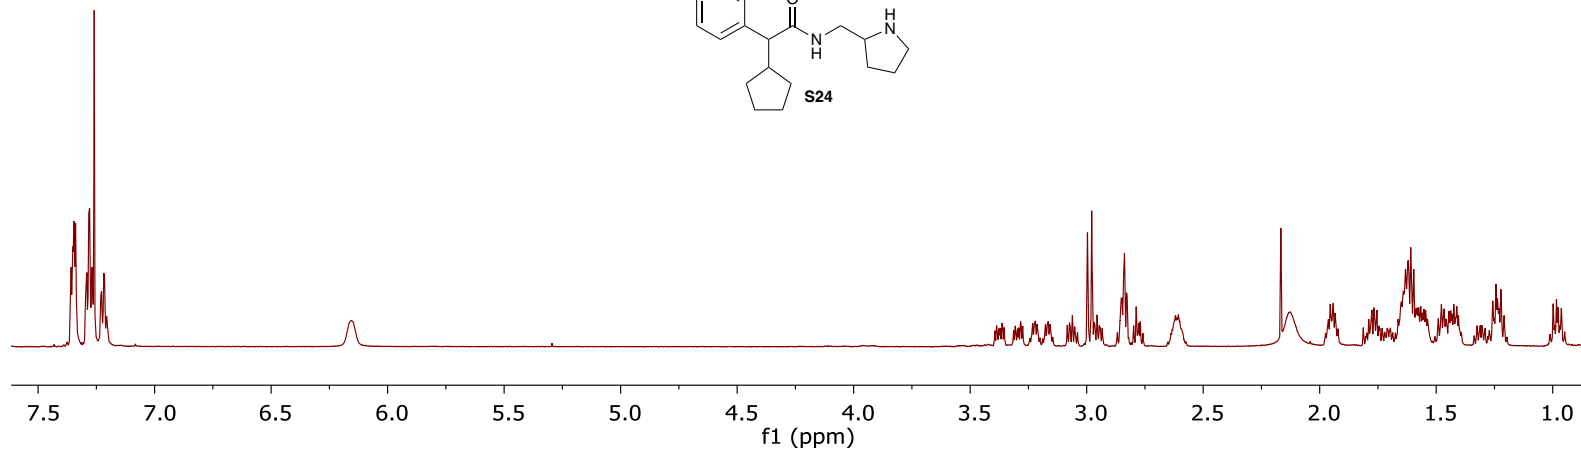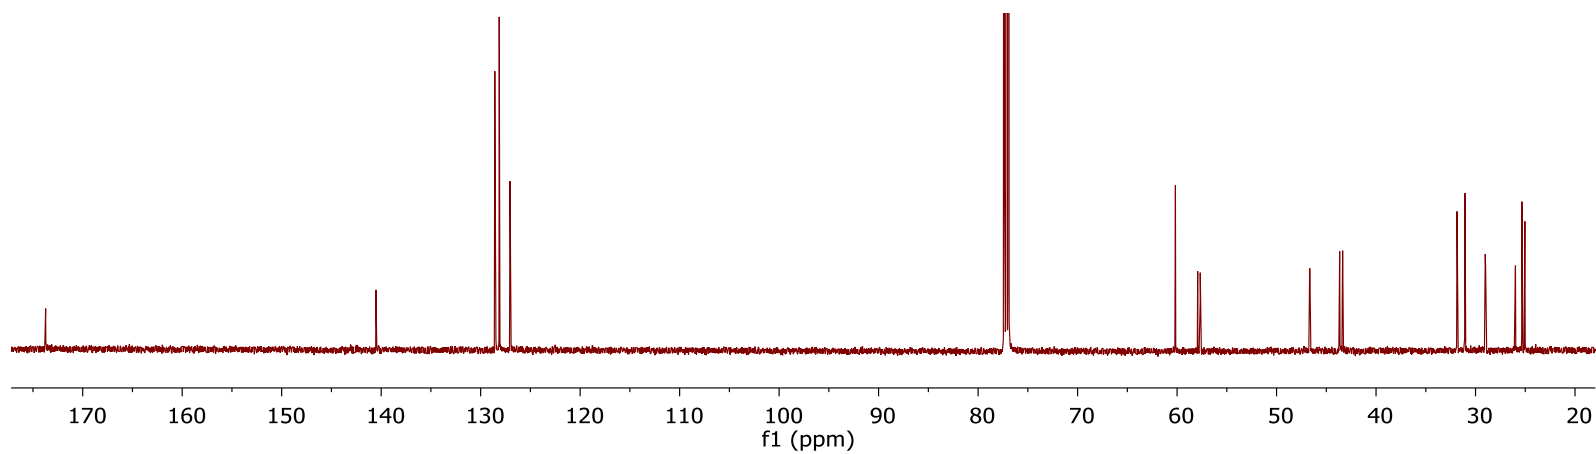

$^1\text{H}$  and  $^{13}\text{C}$  NMR Spectra for **S25**

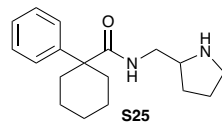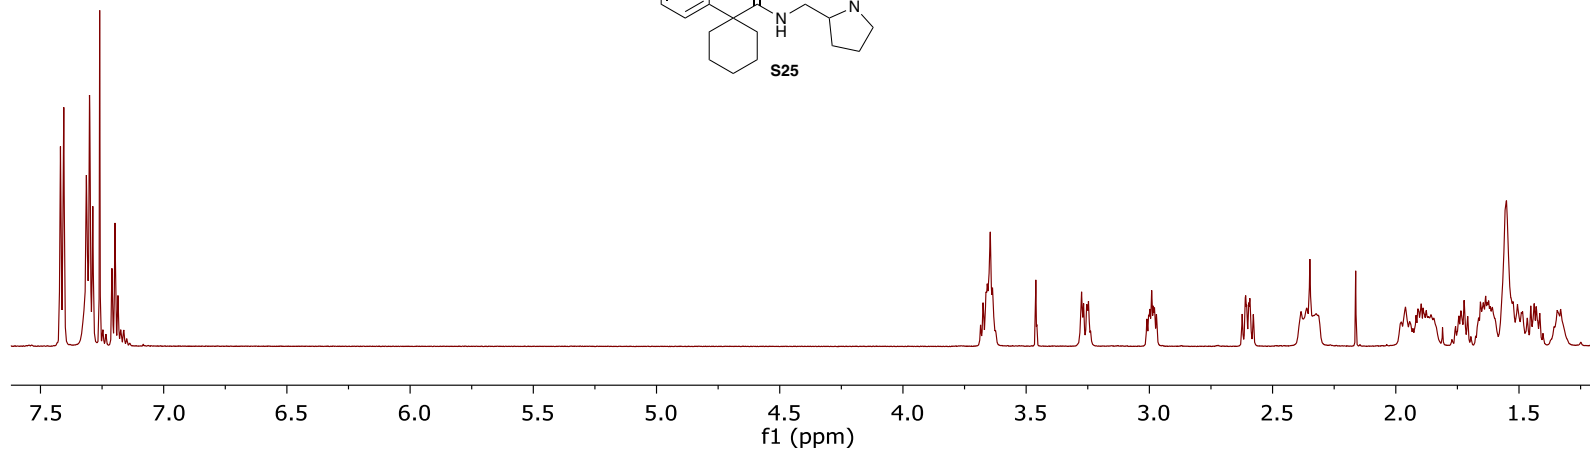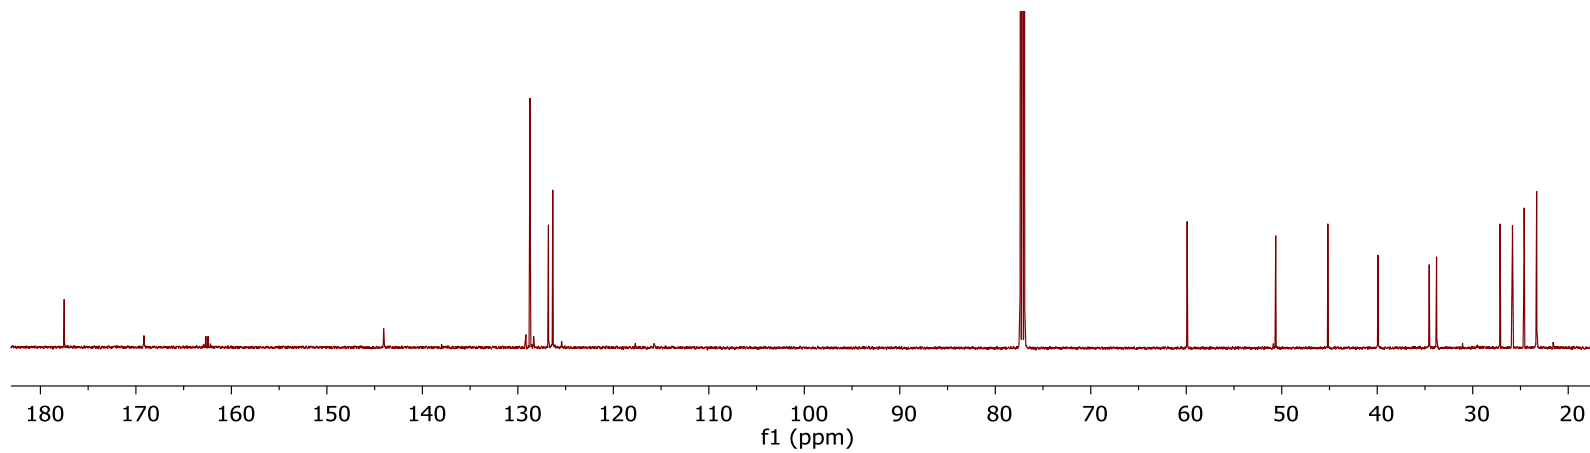



$^1\text{H}$  and  $^{13}\text{C}$  NMR Spectra for **S26**

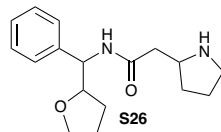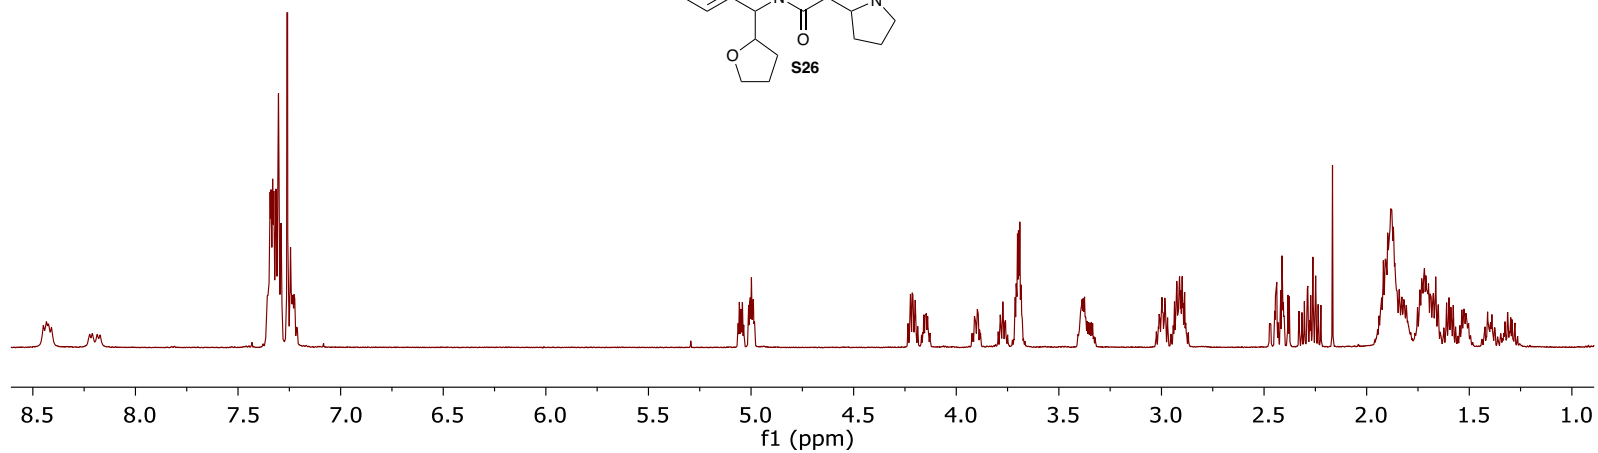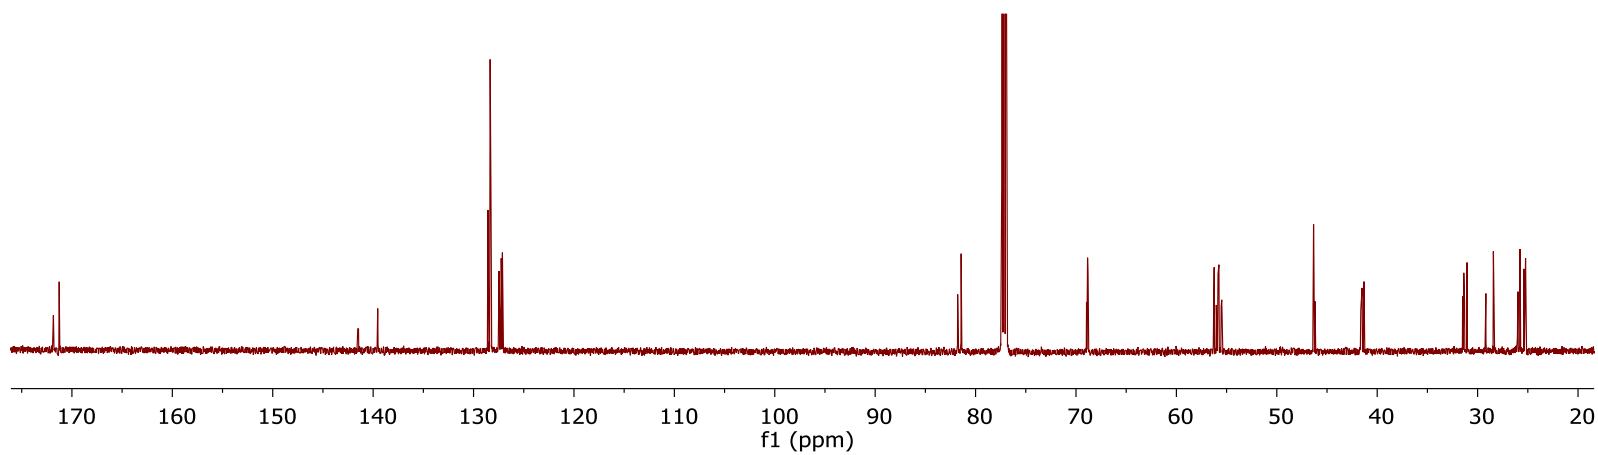

$^1\text{H}$  and  $^{13}\text{C}$  NMR Spectra for **S27**

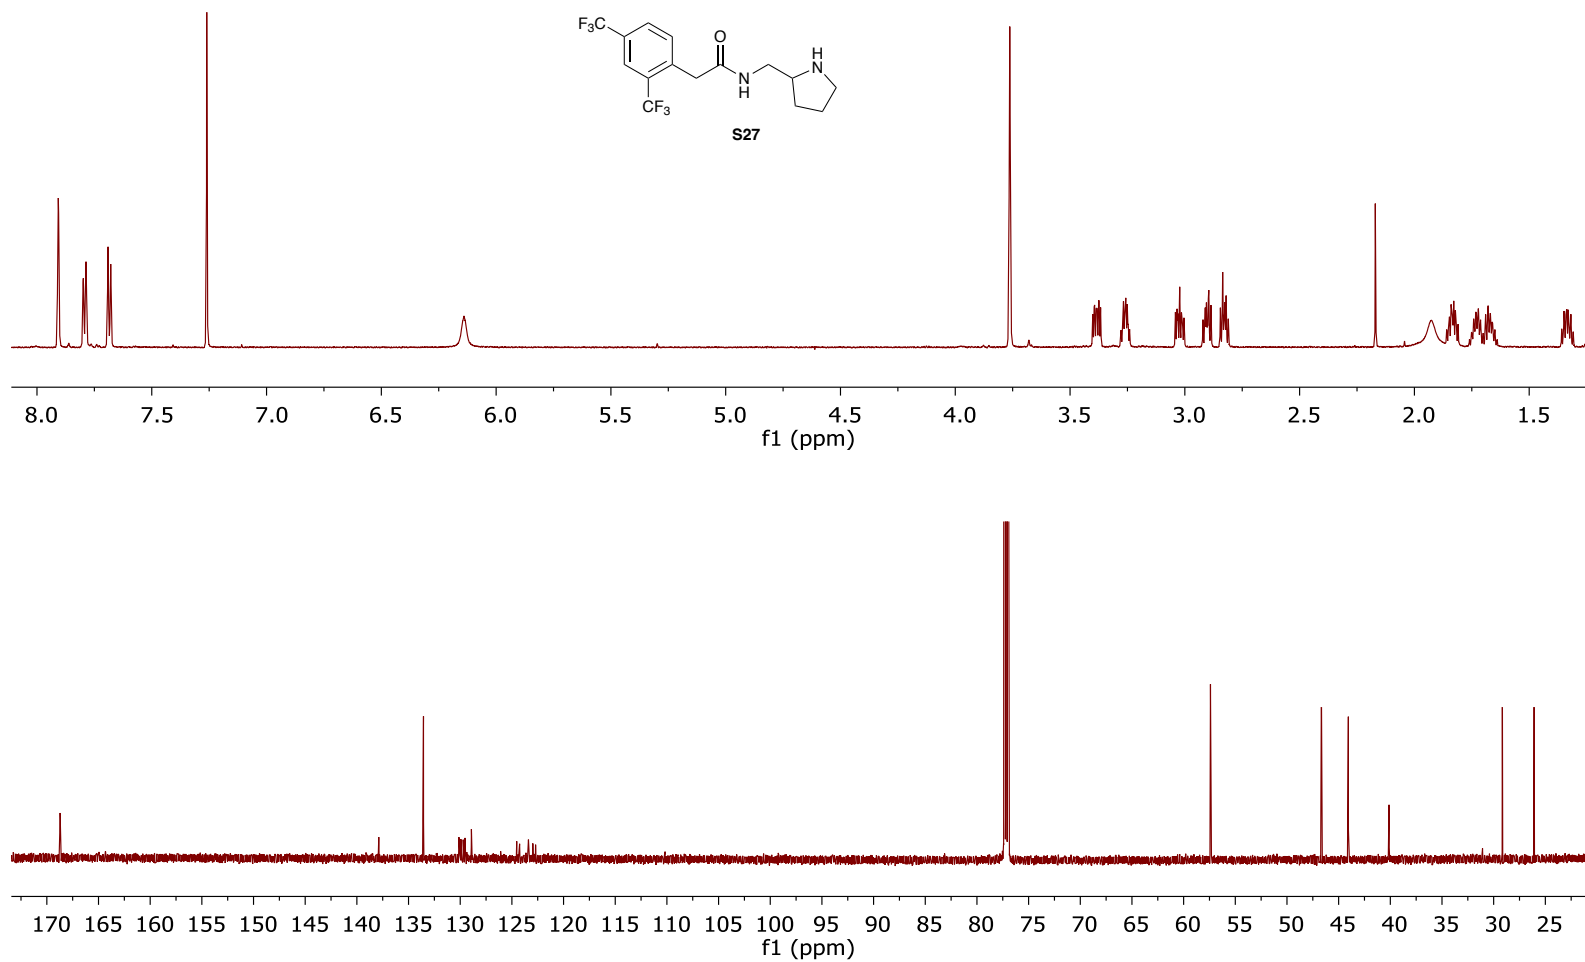

# $^1\text{H}$ and $^{13}\text{C}$ NMR Spectra for S28

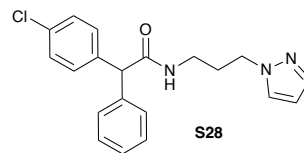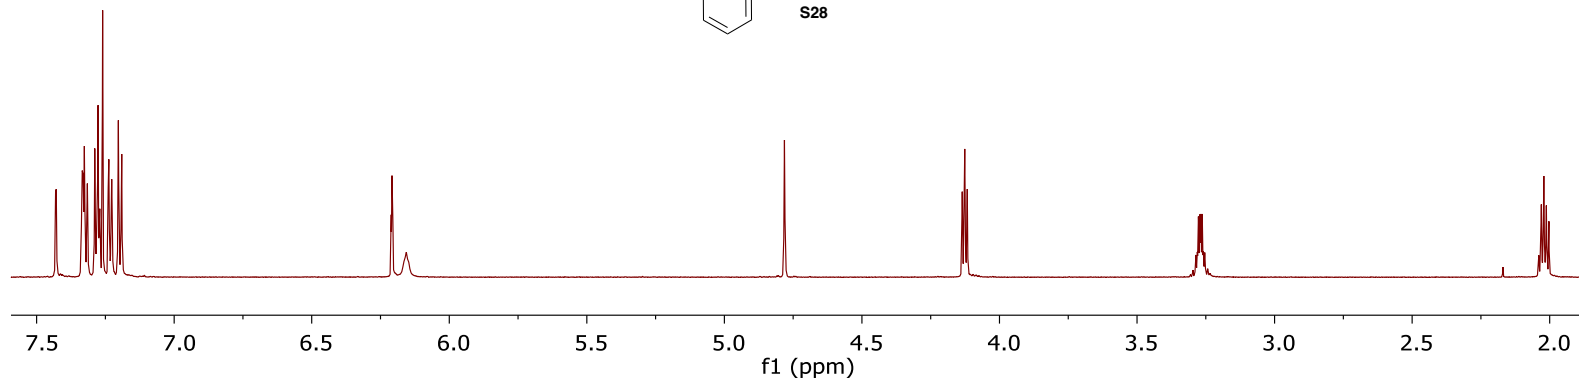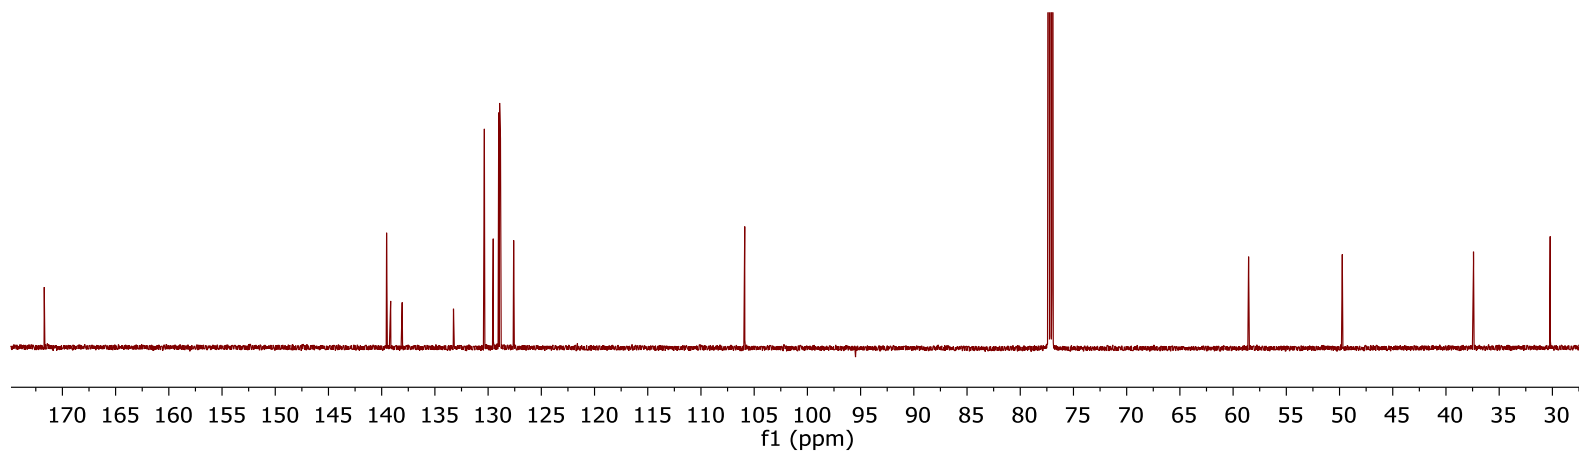

$^1\text{H}$  and  $^{13}\text{C}$  NMR Spectra for S29

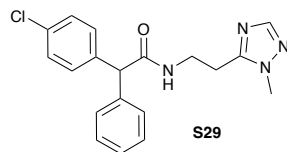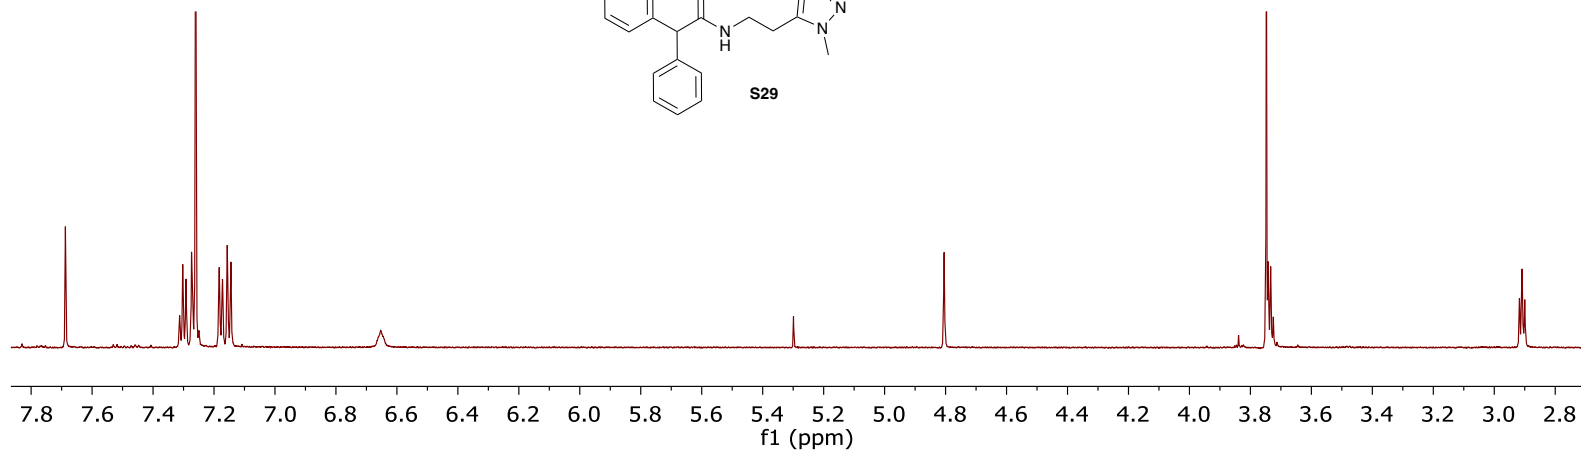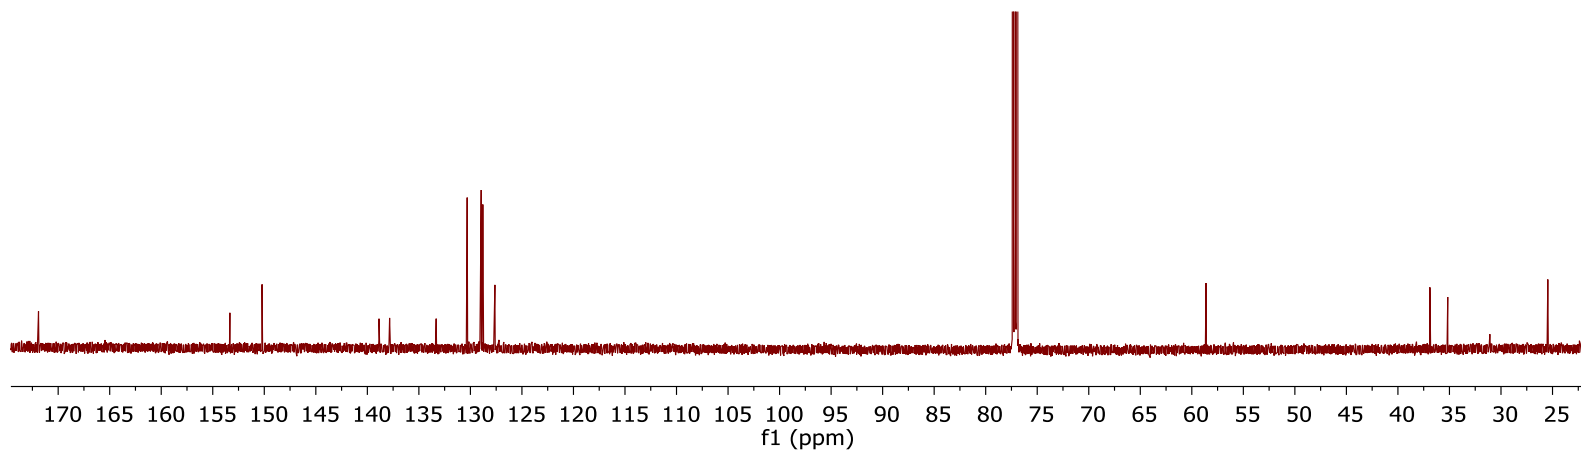

# $^1\text{H}$ and $^{13}\text{C}$ NMR Spectra for **S30**

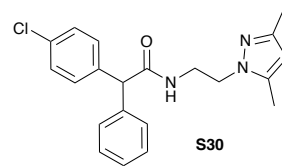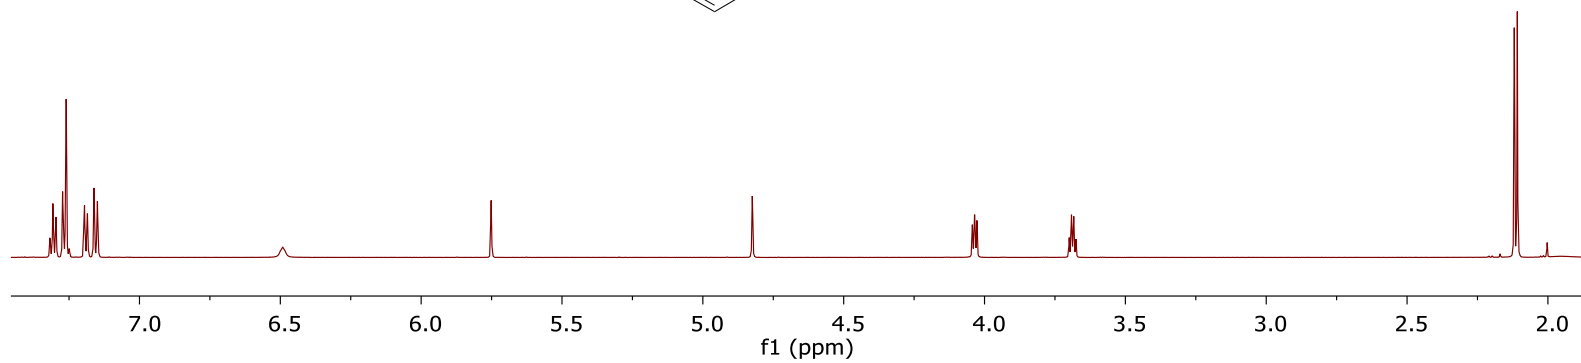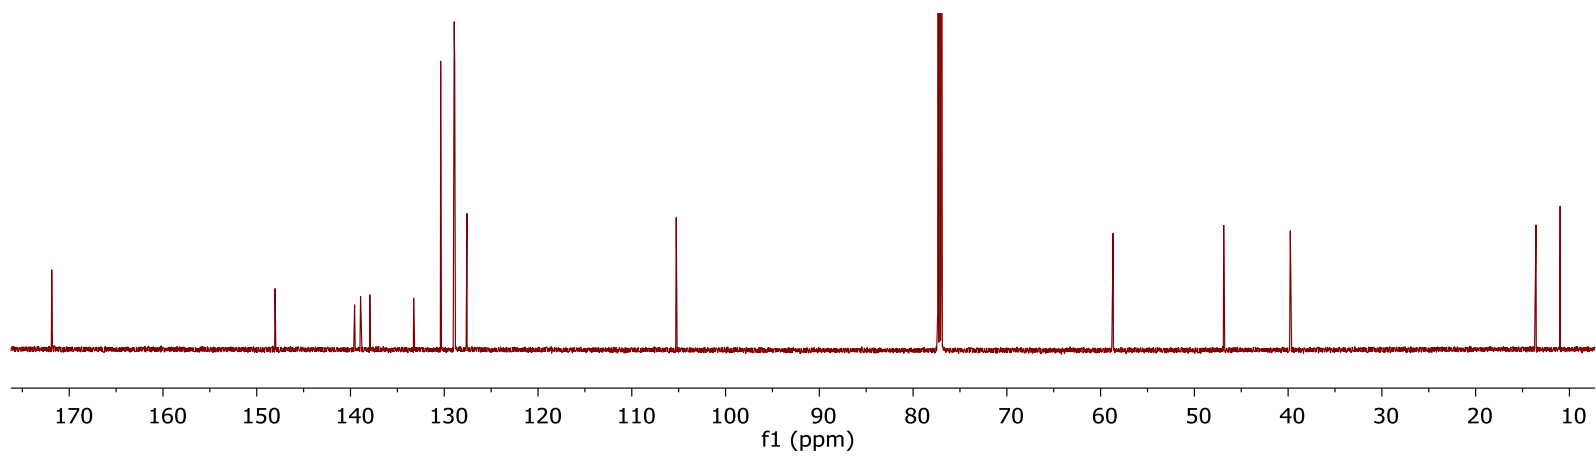

<sup>1</sup>H and <sup>13</sup>C NMR Spectra for S31

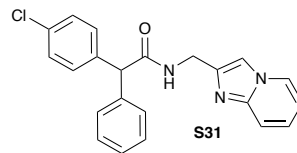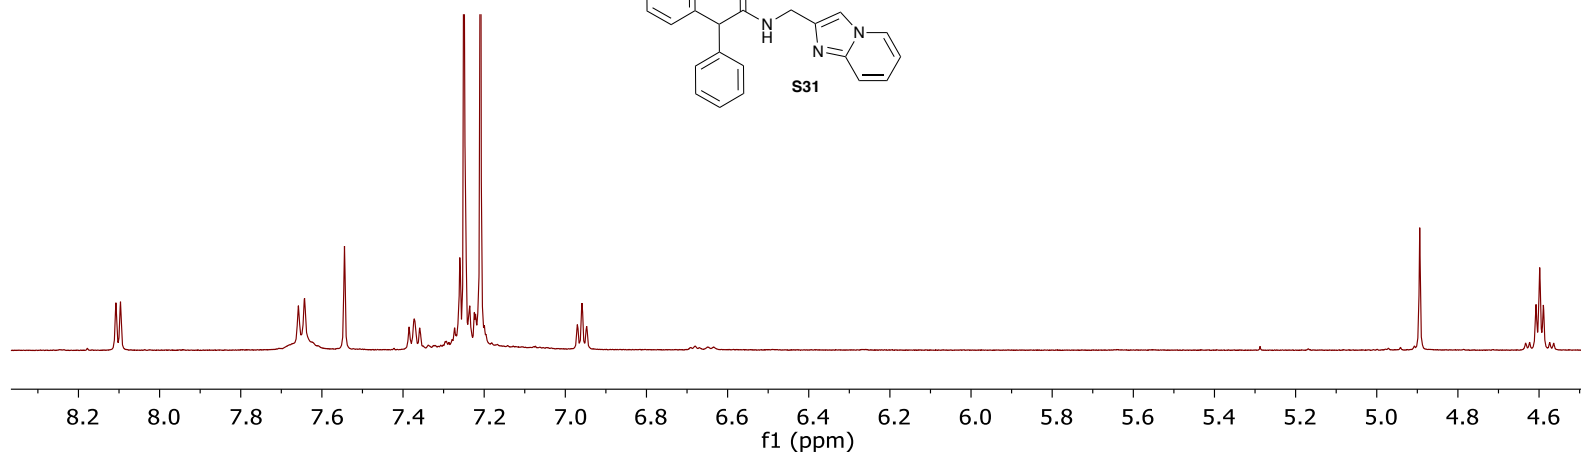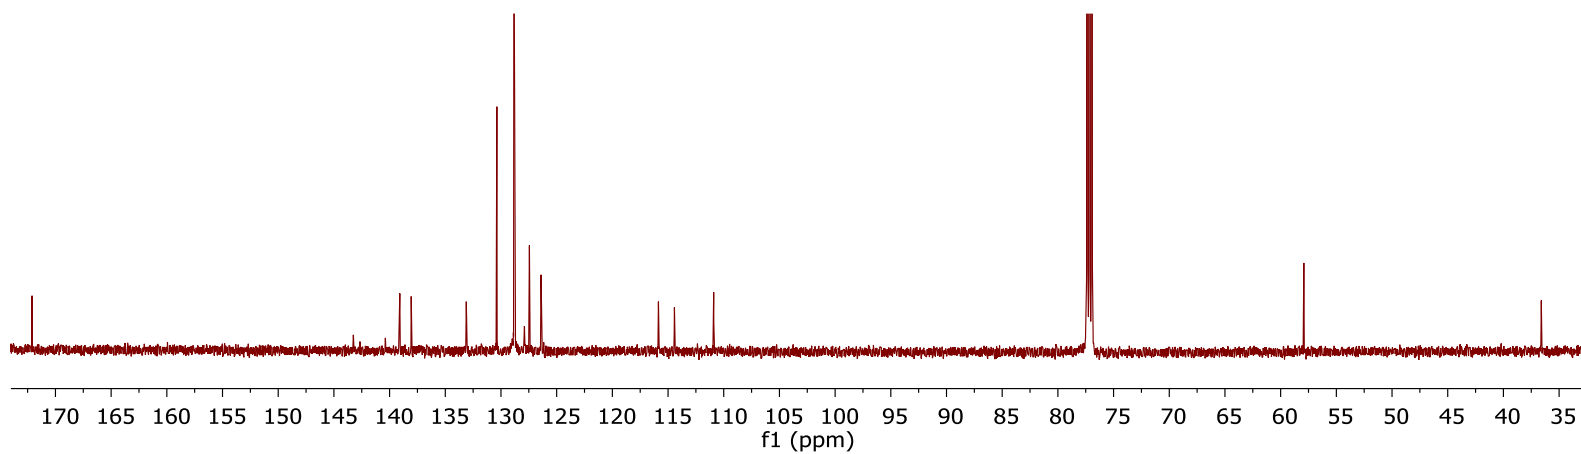

<sup>1</sup>H and <sup>13</sup>C NMR Spectra for S32

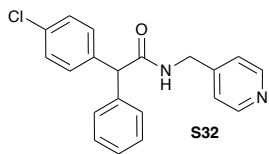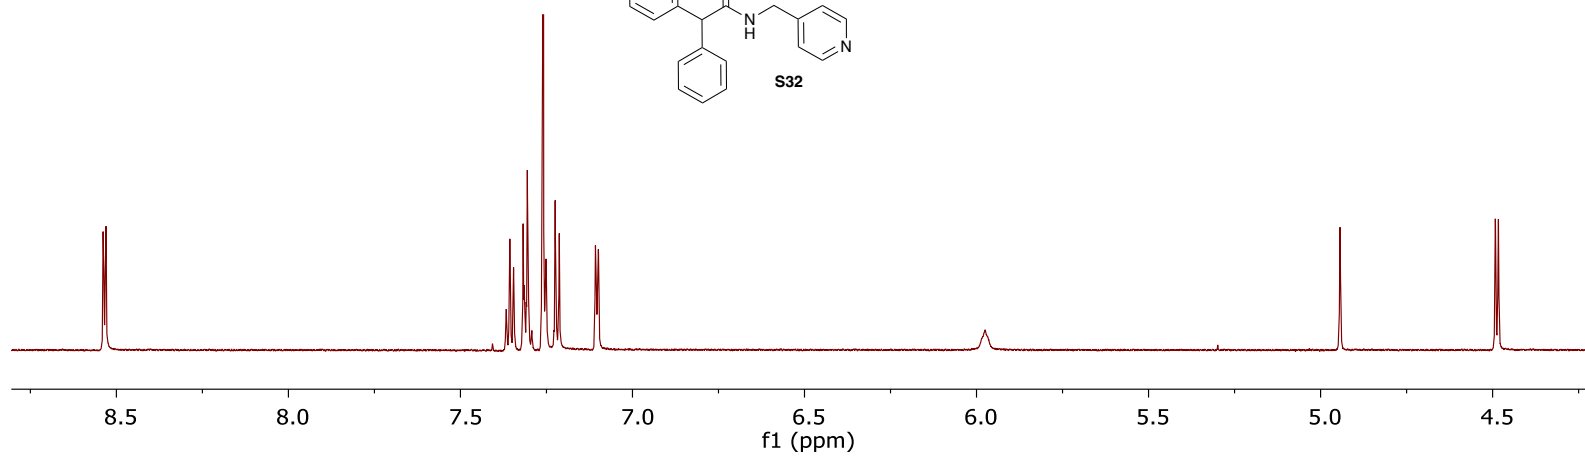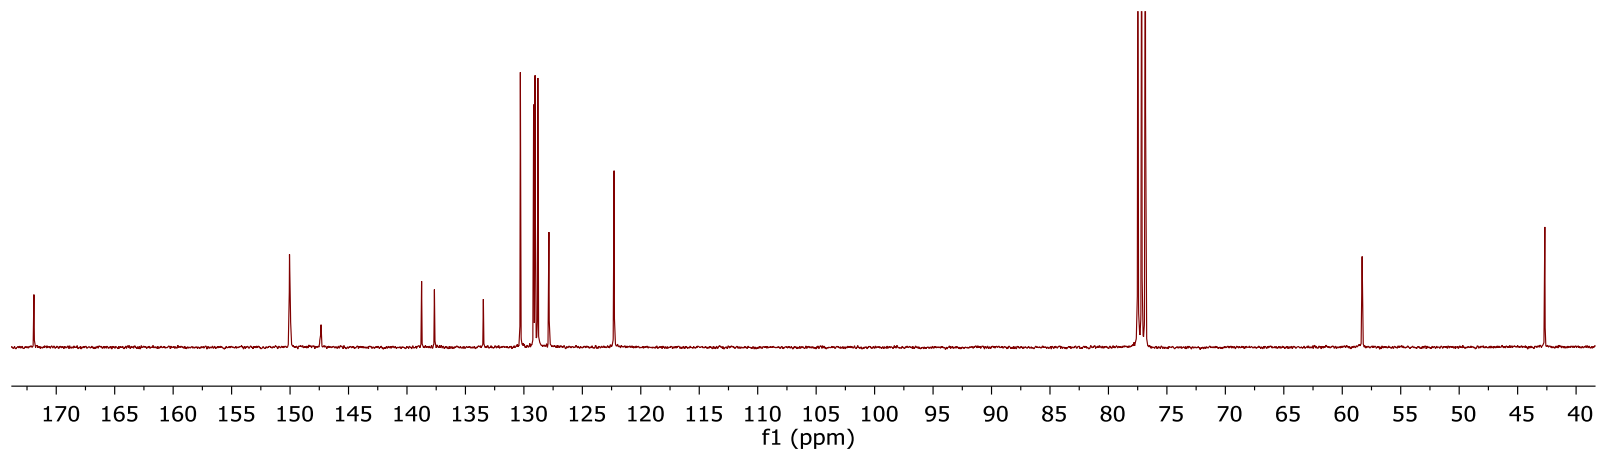

# $^1\text{H}$ and $^{13}\text{C}$ NMR Spectra for S33

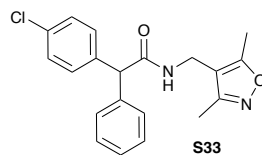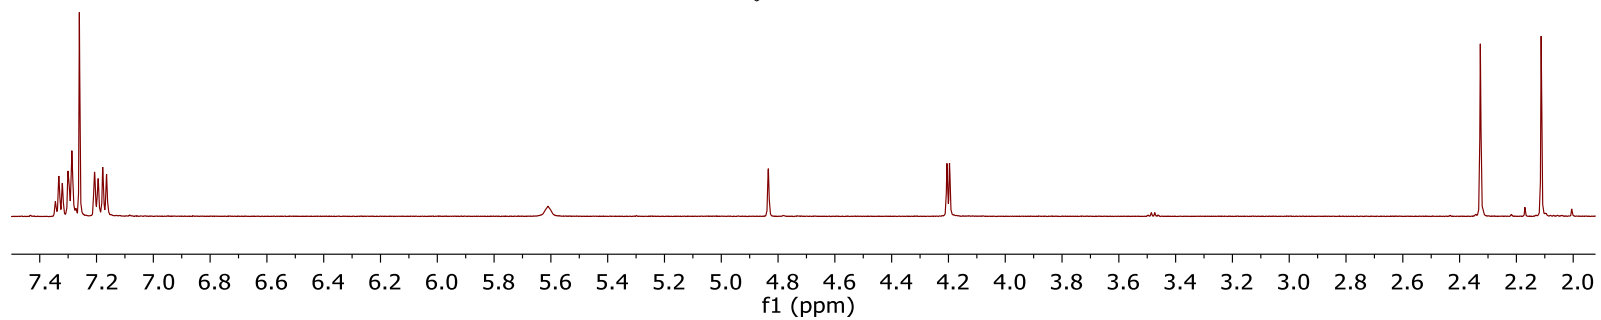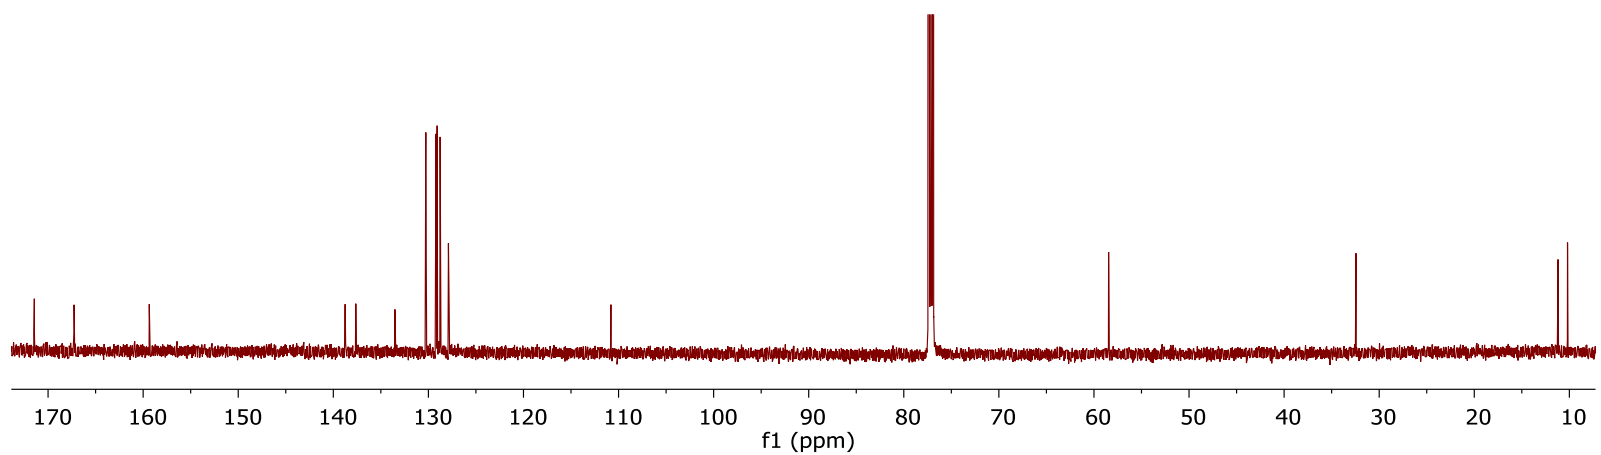



$^1\text{H}$  and  $^{13}\text{C}$  NMR Spectra for **S34**

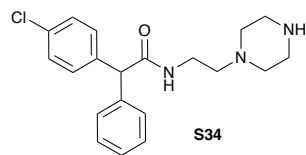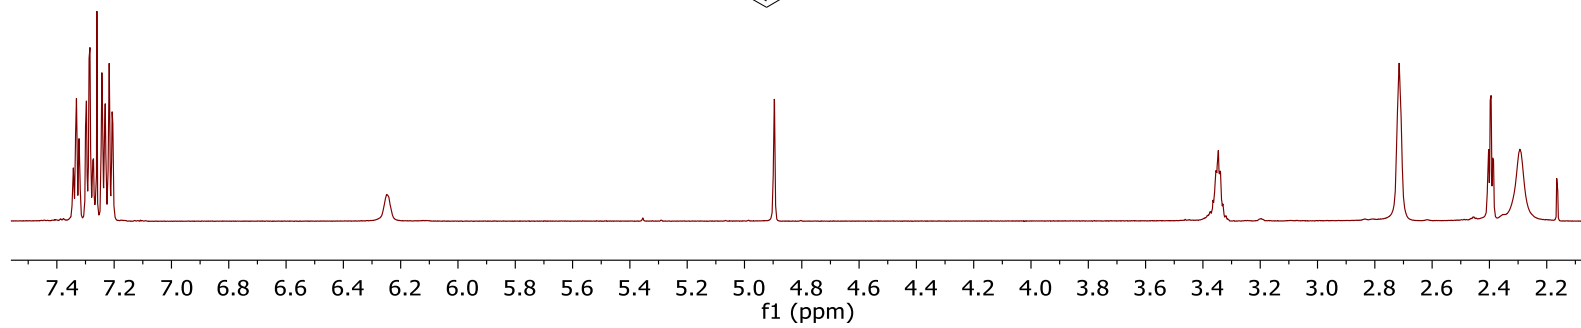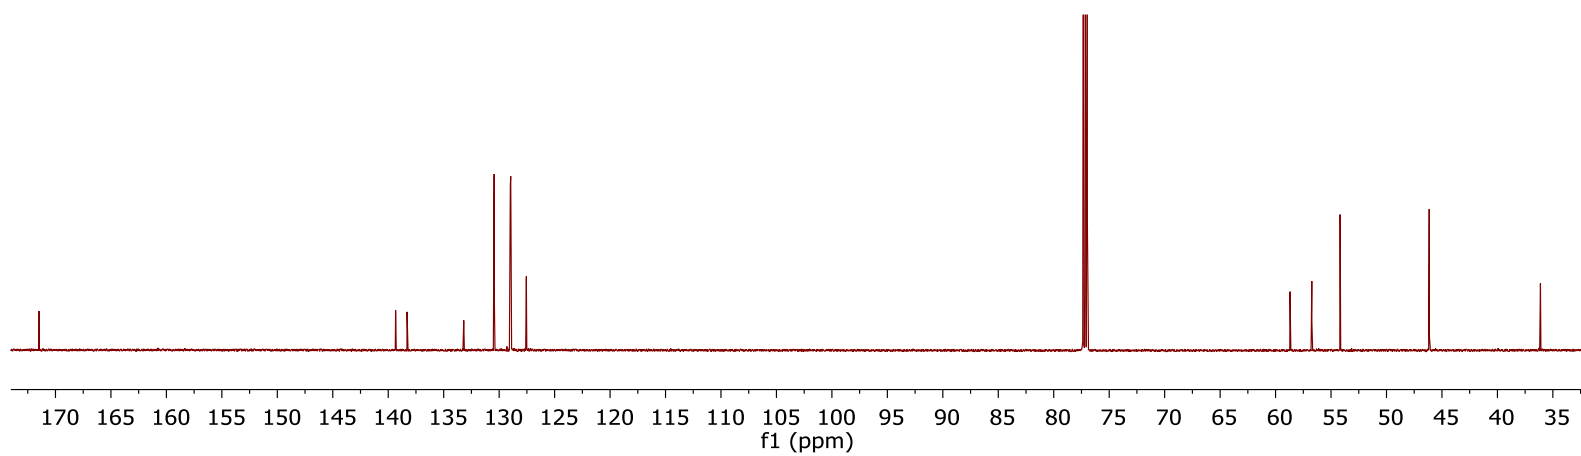

# $^1\text{H}$ and $^{13}\text{C}$ NMR Spectra for S35

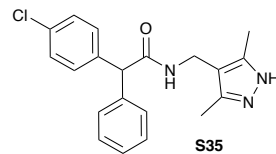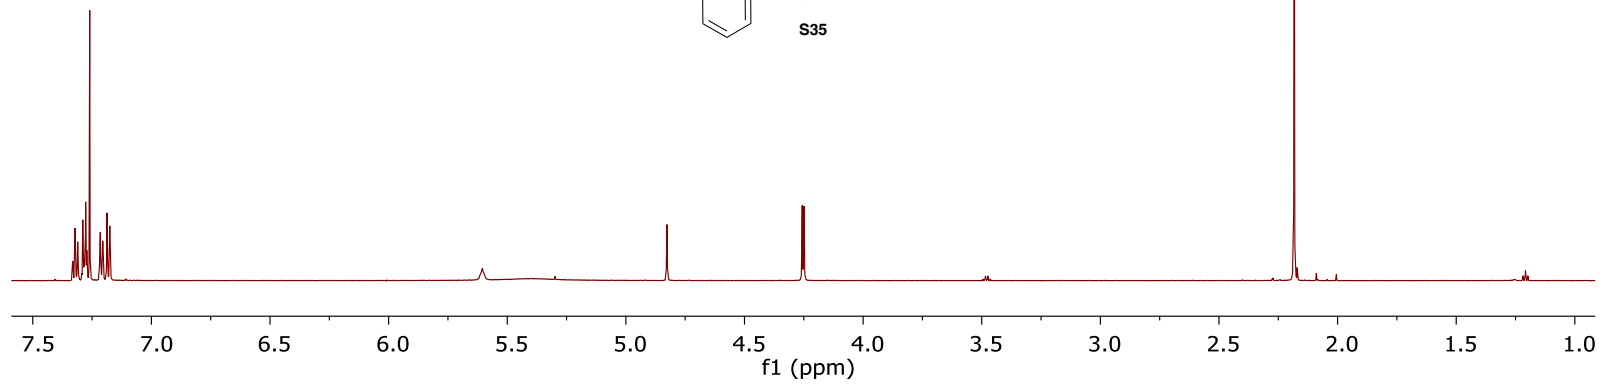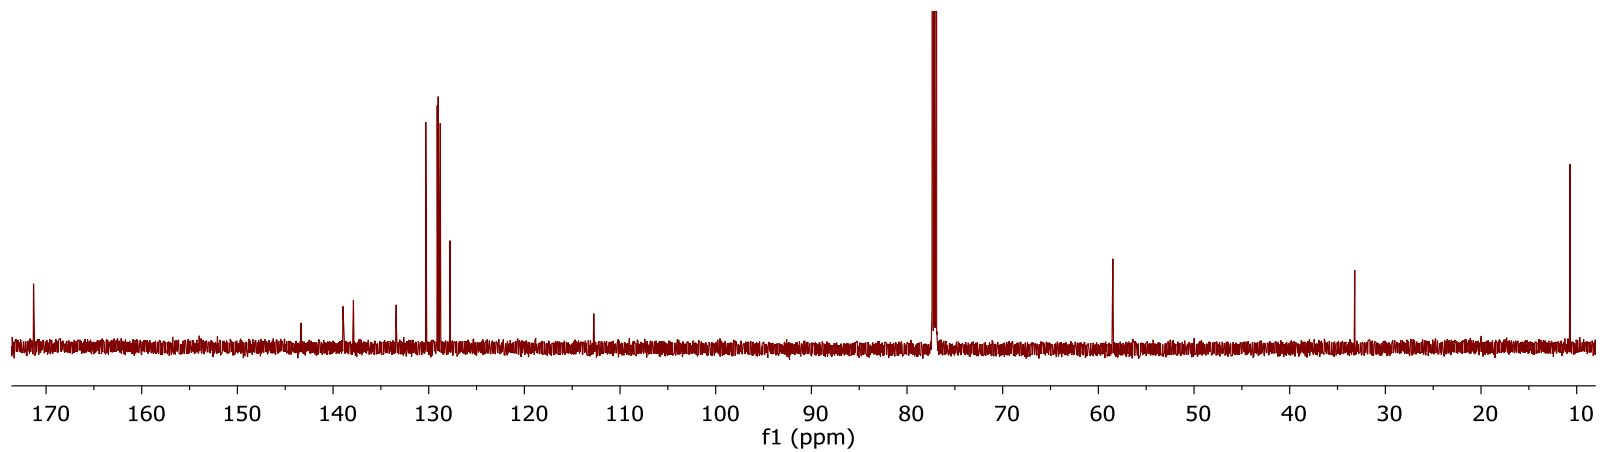

<sup>1</sup>H and <sup>13</sup>C NMR Spectra for S36

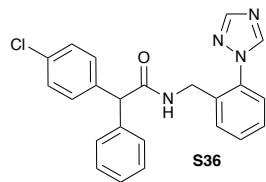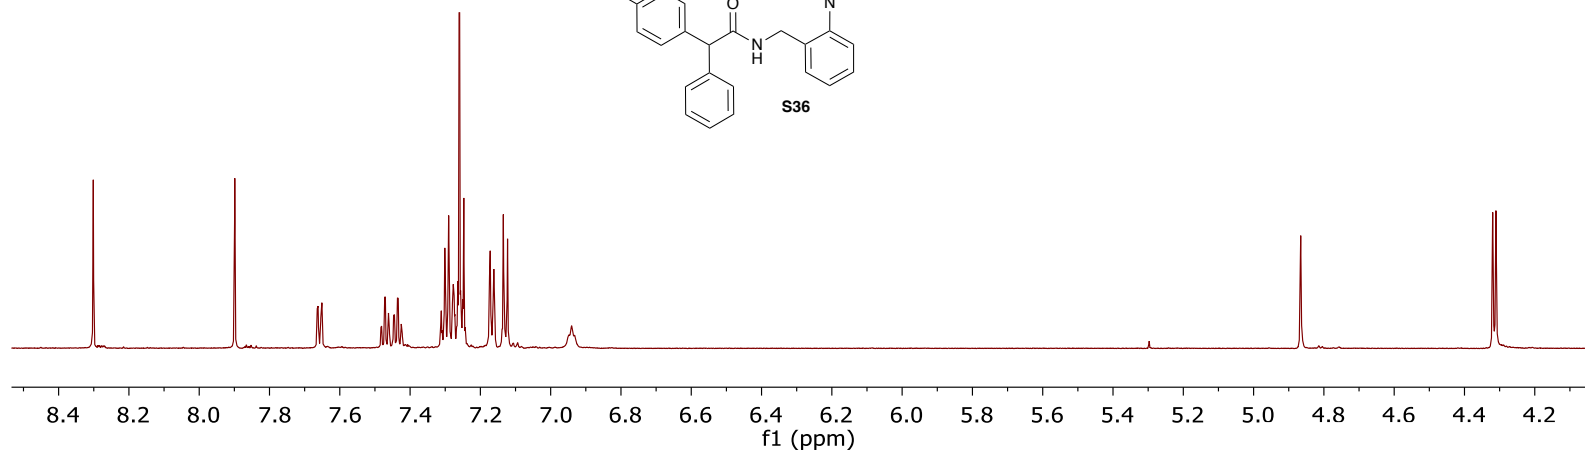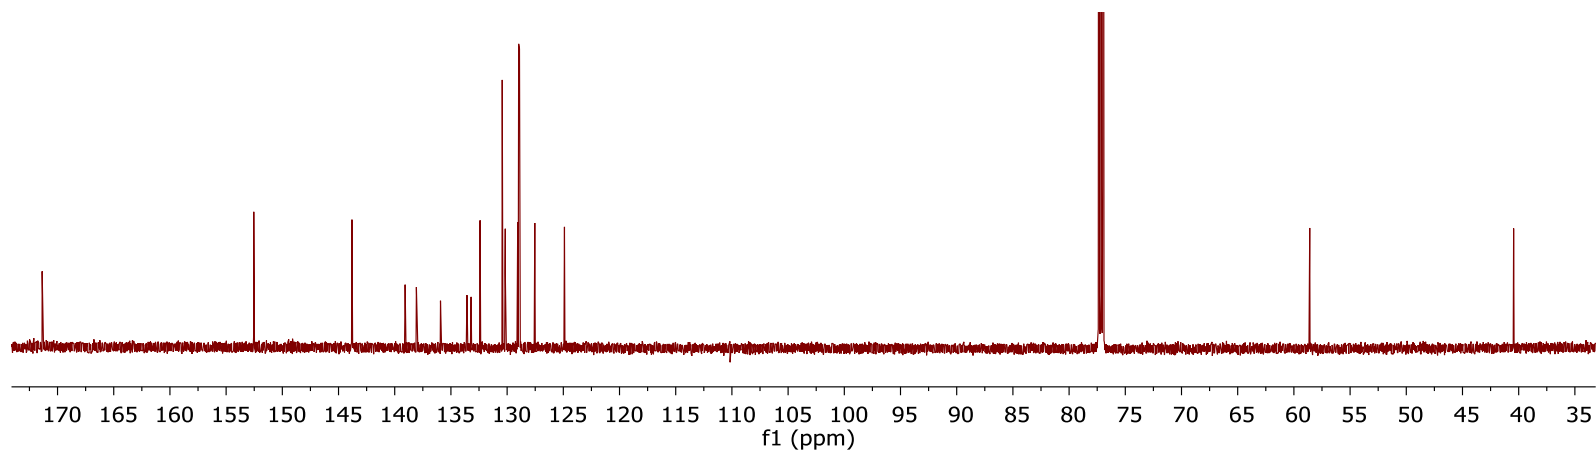

$^1\text{H}$  and  $^{13}\text{C}$  NMR Spectra for **S37**

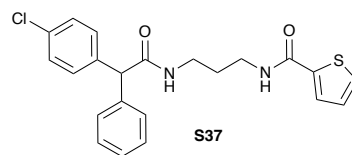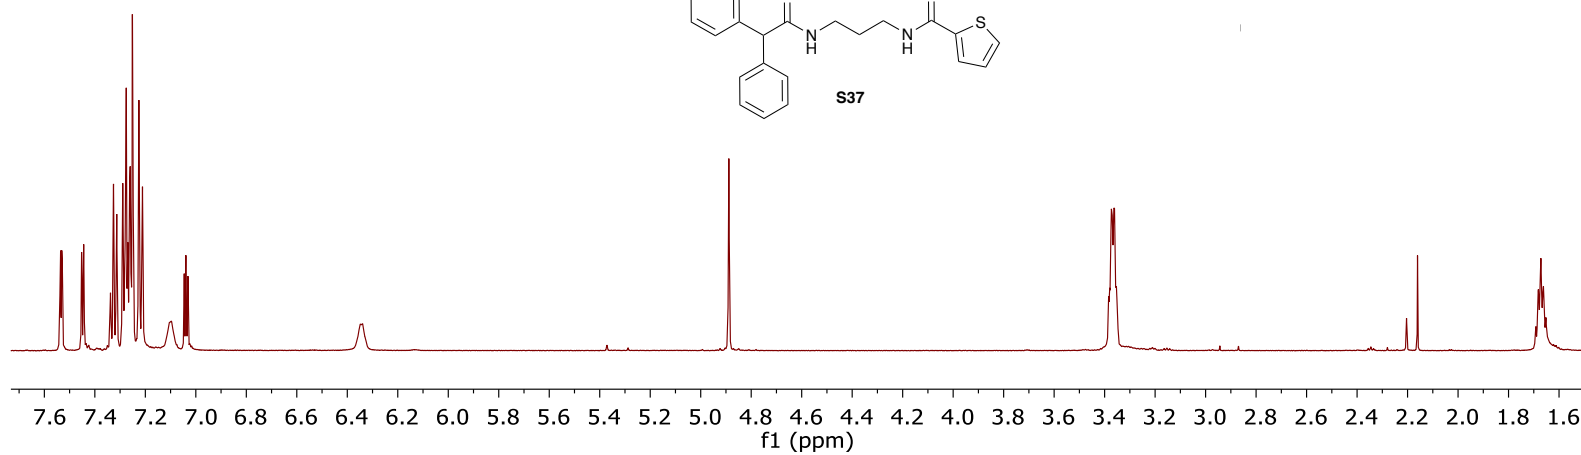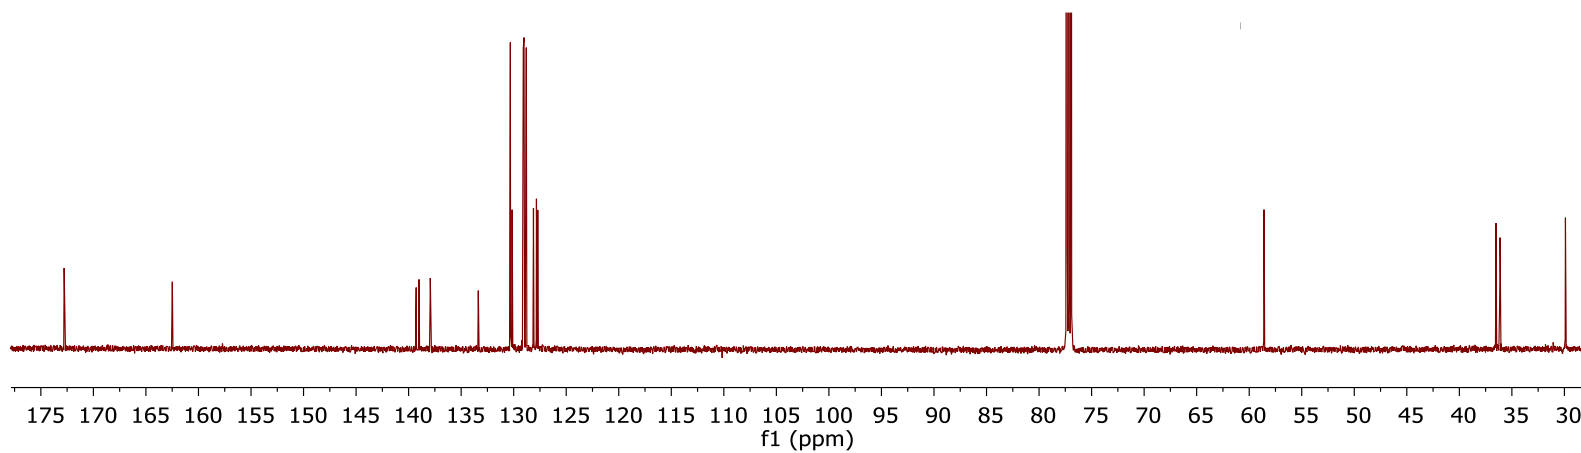

# $^1\text{H}$ and $^{13}\text{C}$ NMR Spectra for S38

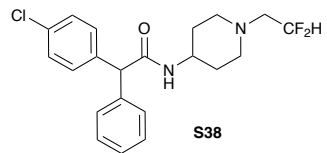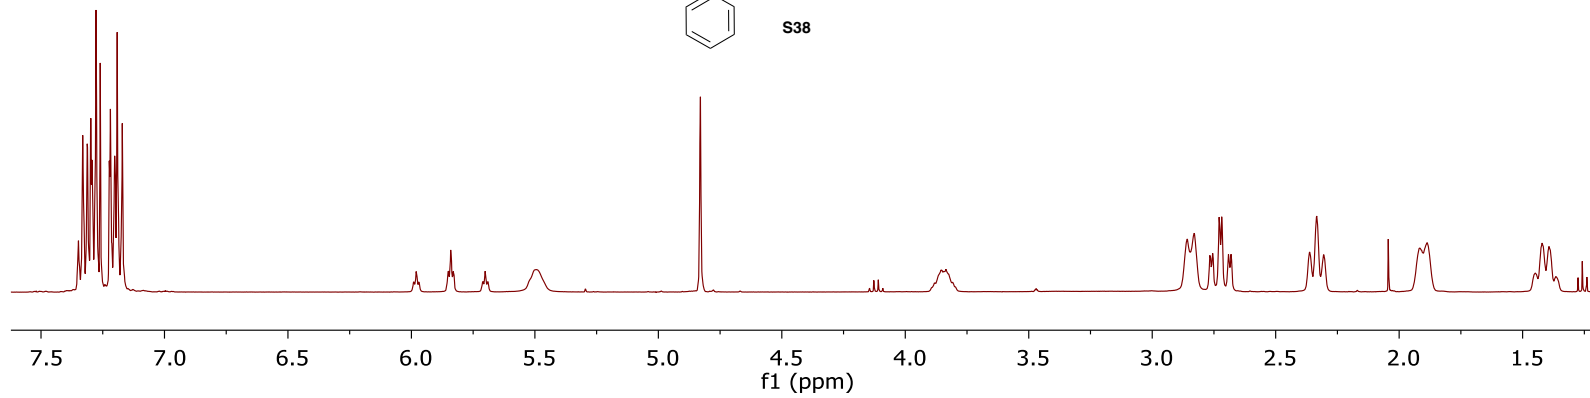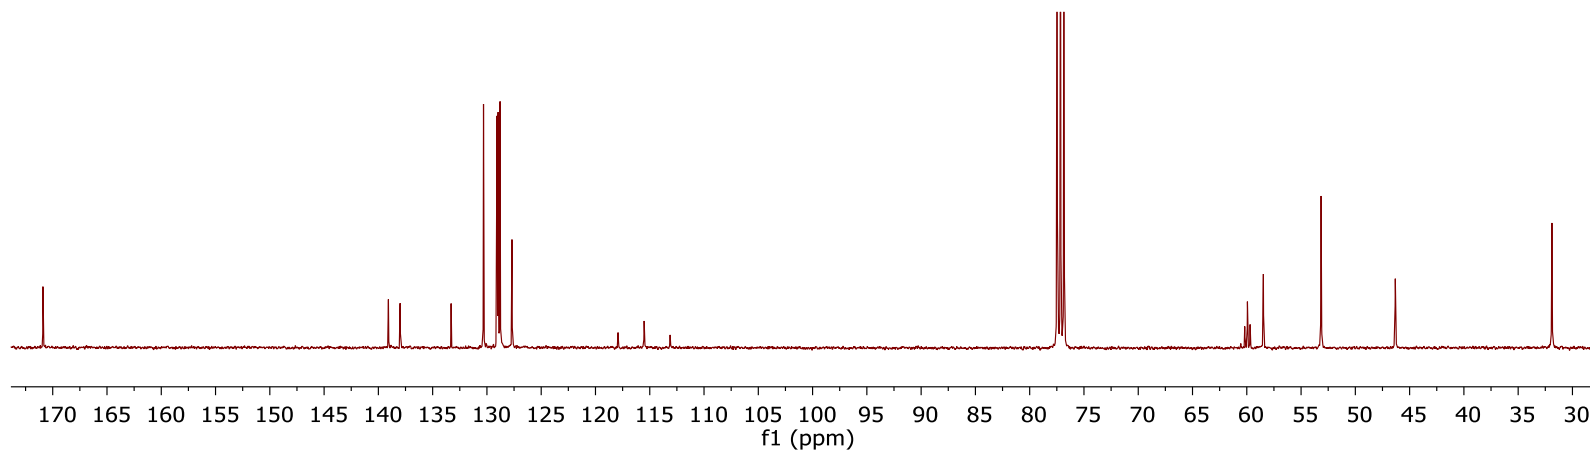

# $^1\text{H}$ and $^{13}\text{C}$ NMR Spectra for S39

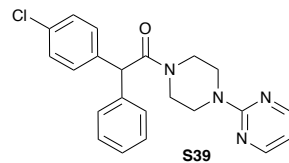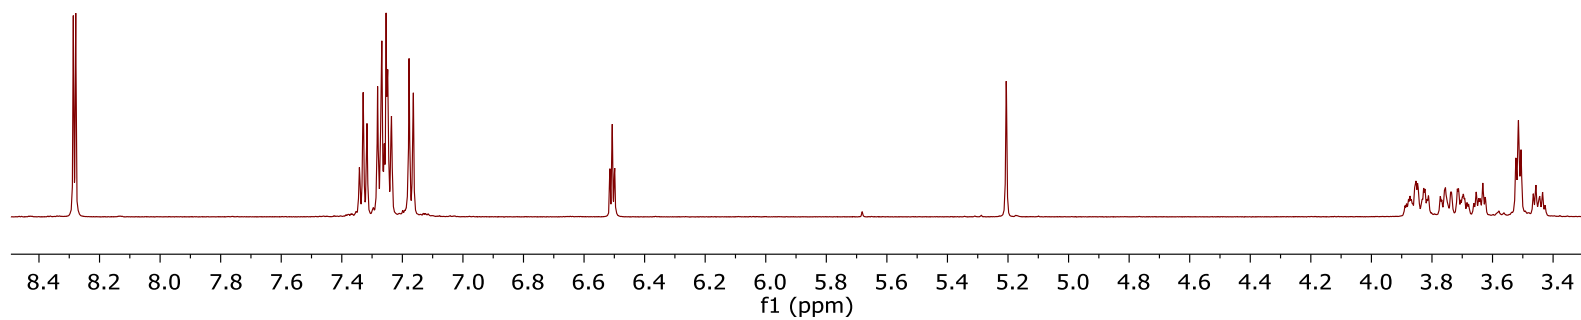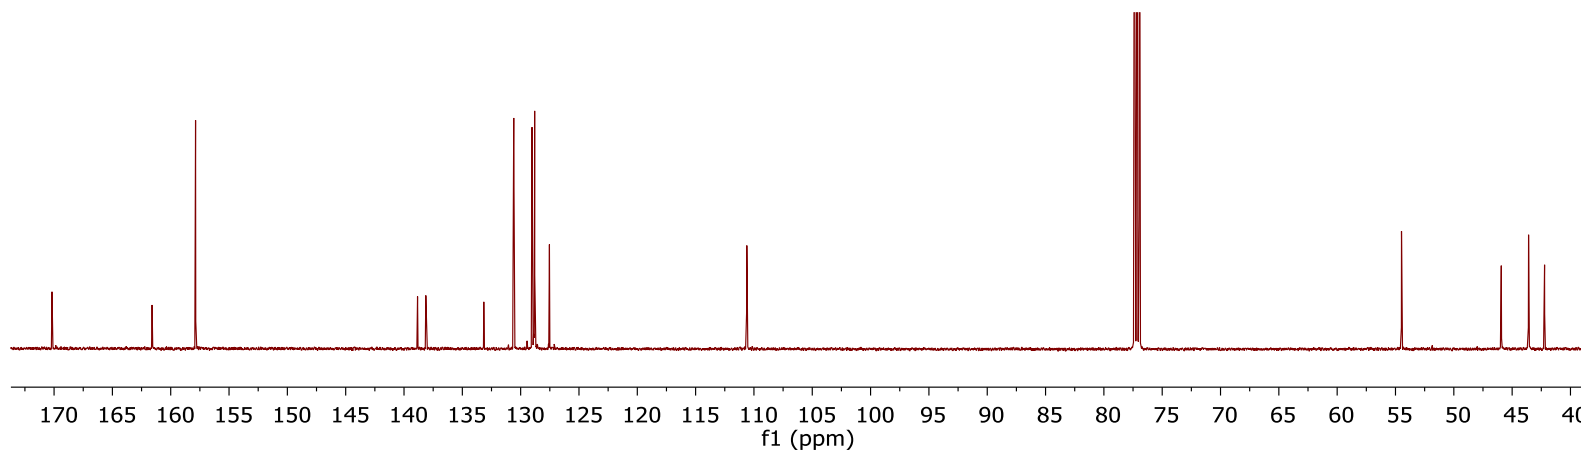



# <sup>1</sup>H and <sup>13</sup>C NMR Spectra for S41

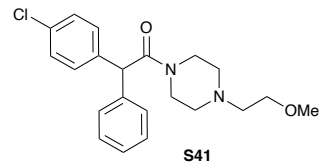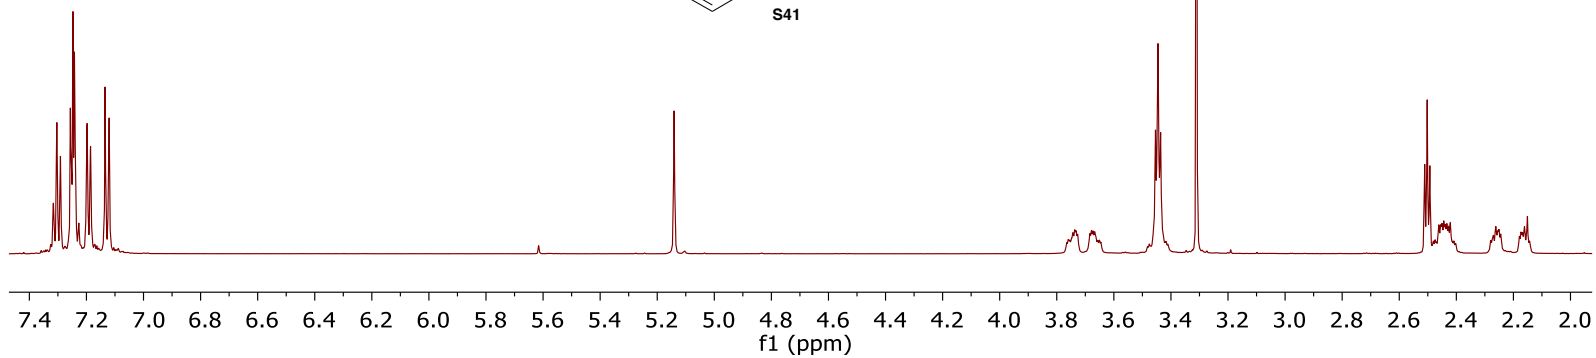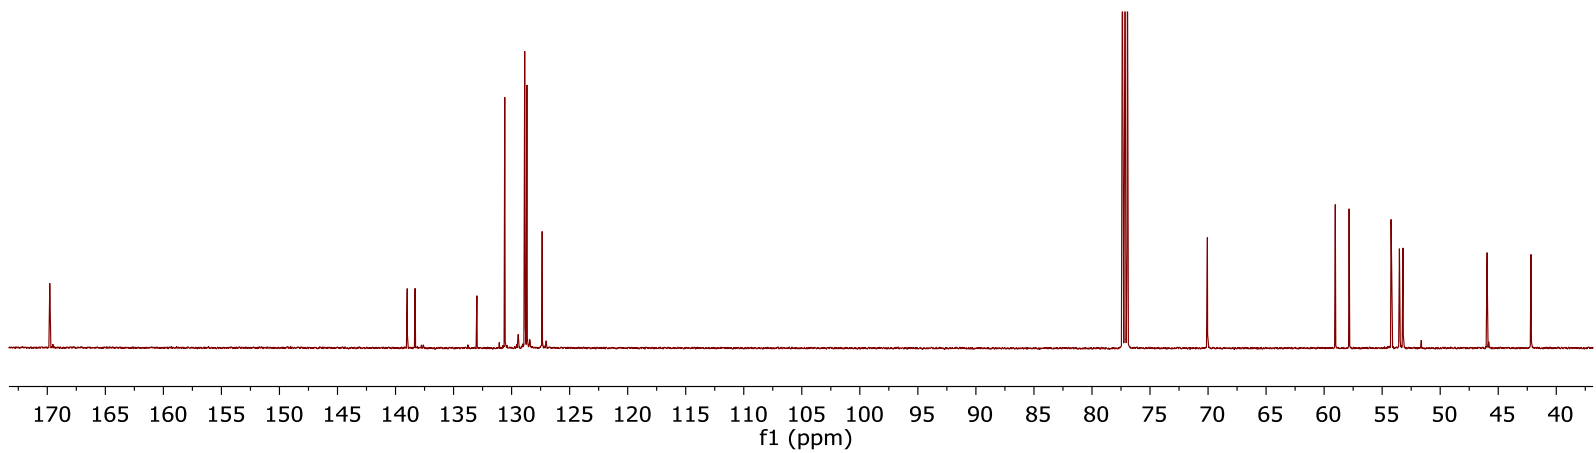





# $^1\text{H}$ and $^{13}\text{C}$ NMR Spectra for S43

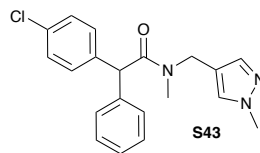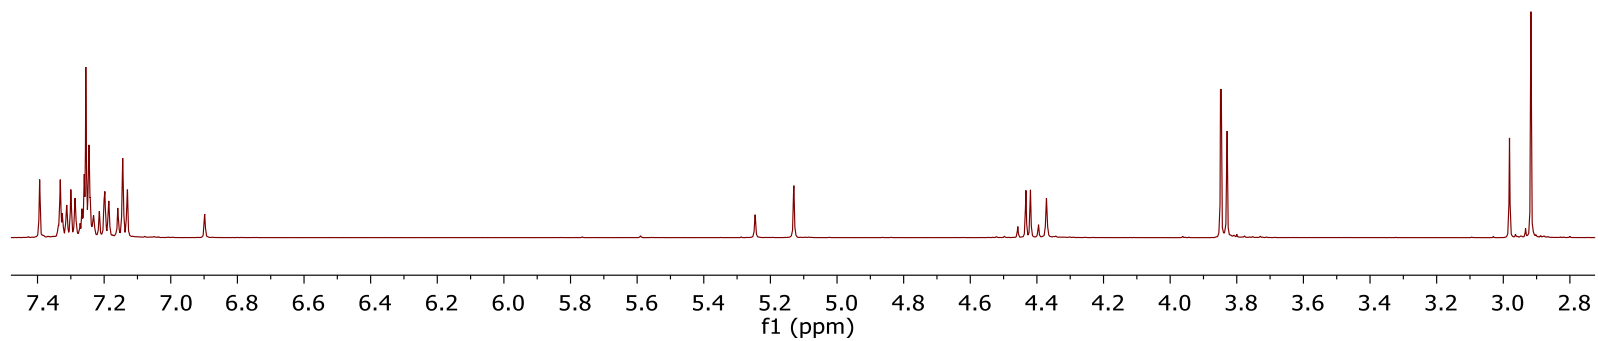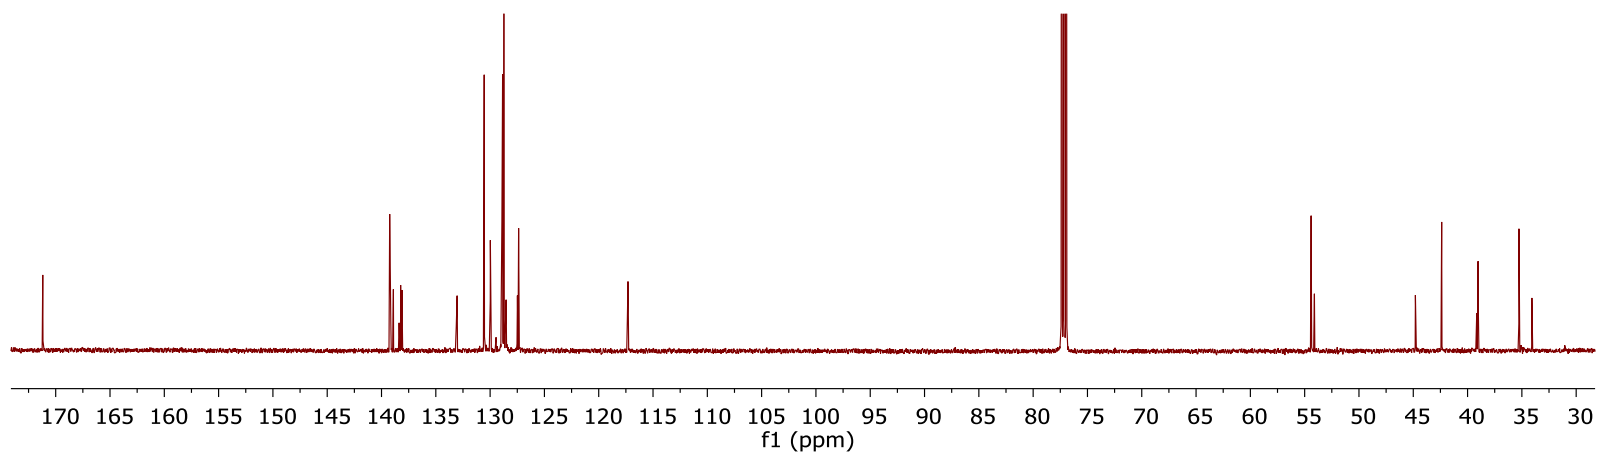

$^1\text{H}$  and  $^{13}\text{C}$  NMR Spectra for **S44**

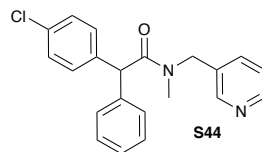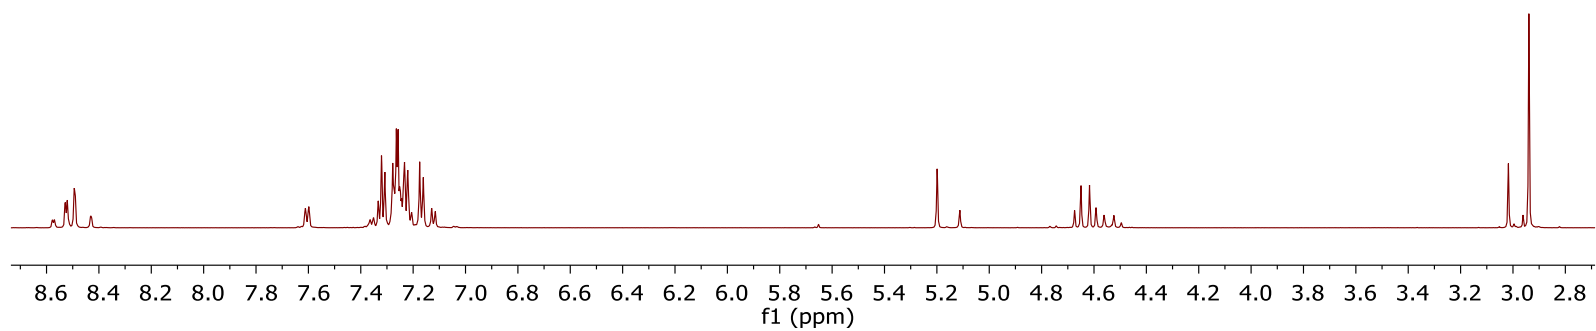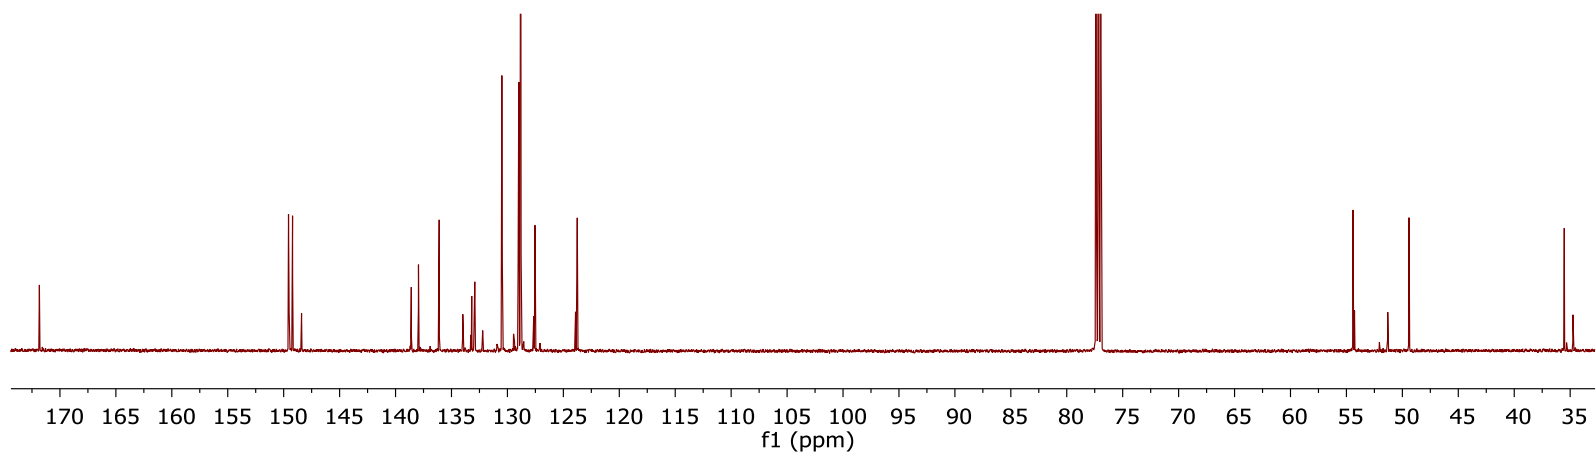

<sup>1</sup>H and <sup>13</sup>C NMR Spectra for S45

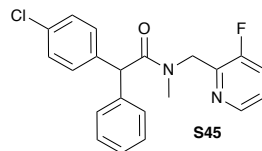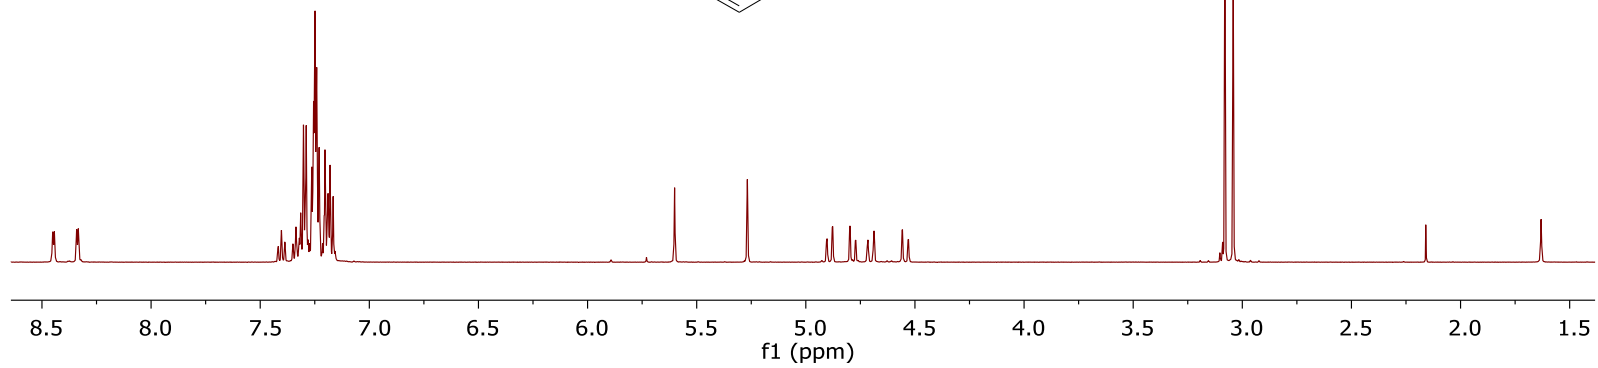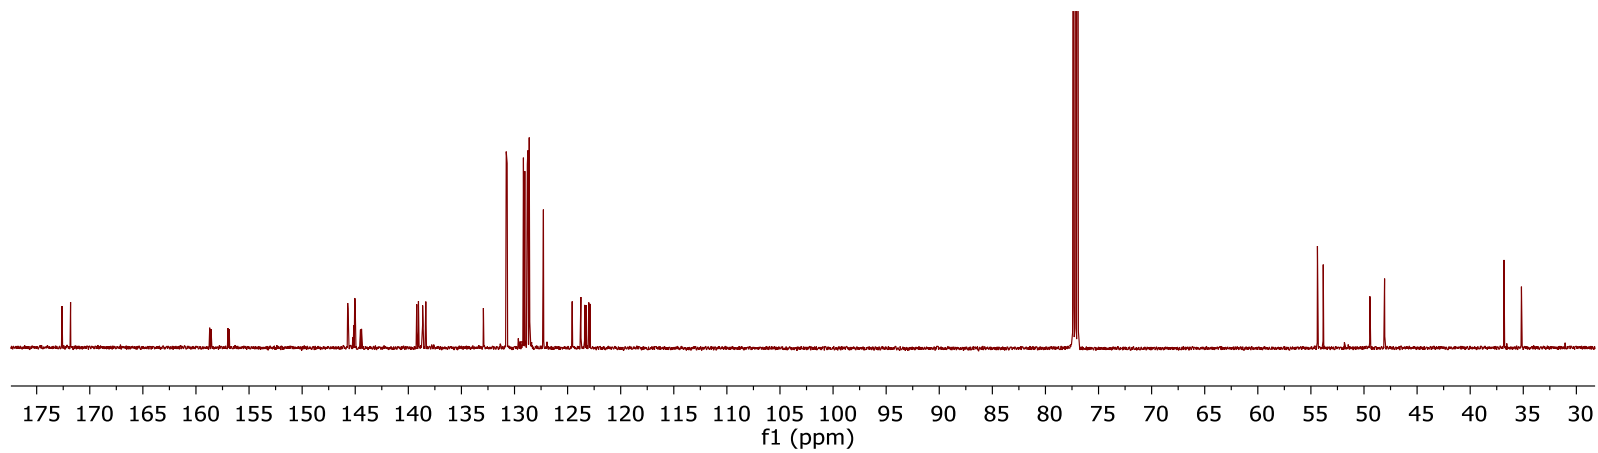

$^1\text{H}$  and  $^{13}\text{C}$  NMR Spectra for **S46**

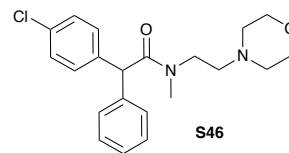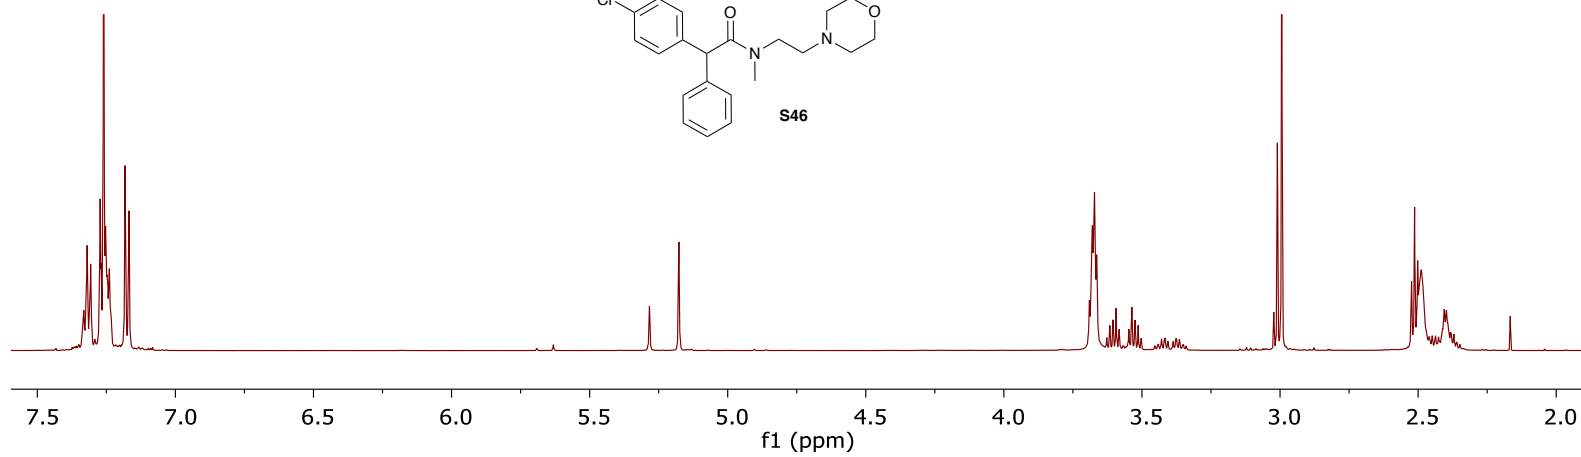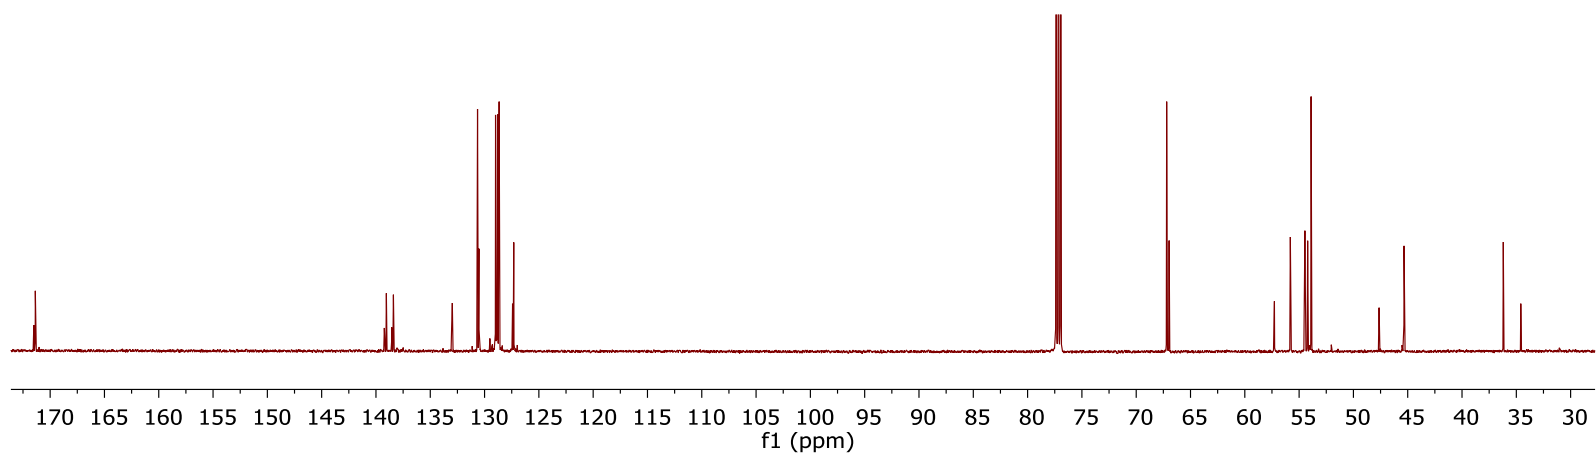

<sup>1</sup>H and <sup>13</sup>C NMR Spectra for S47

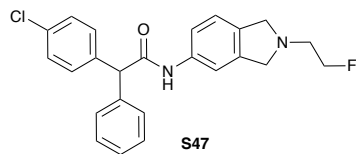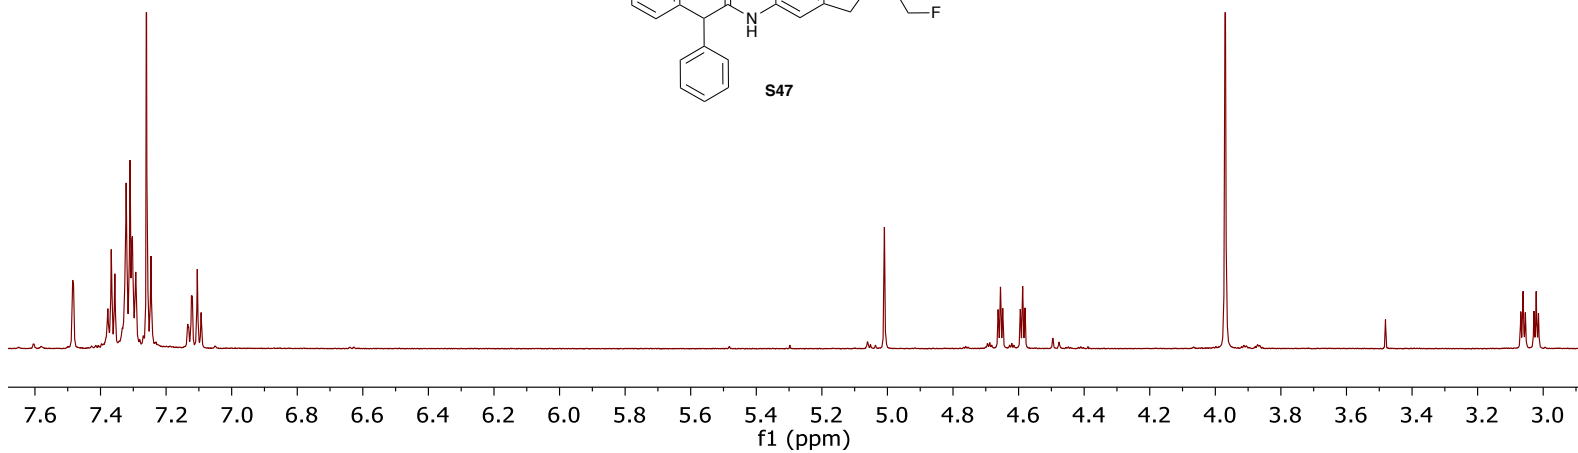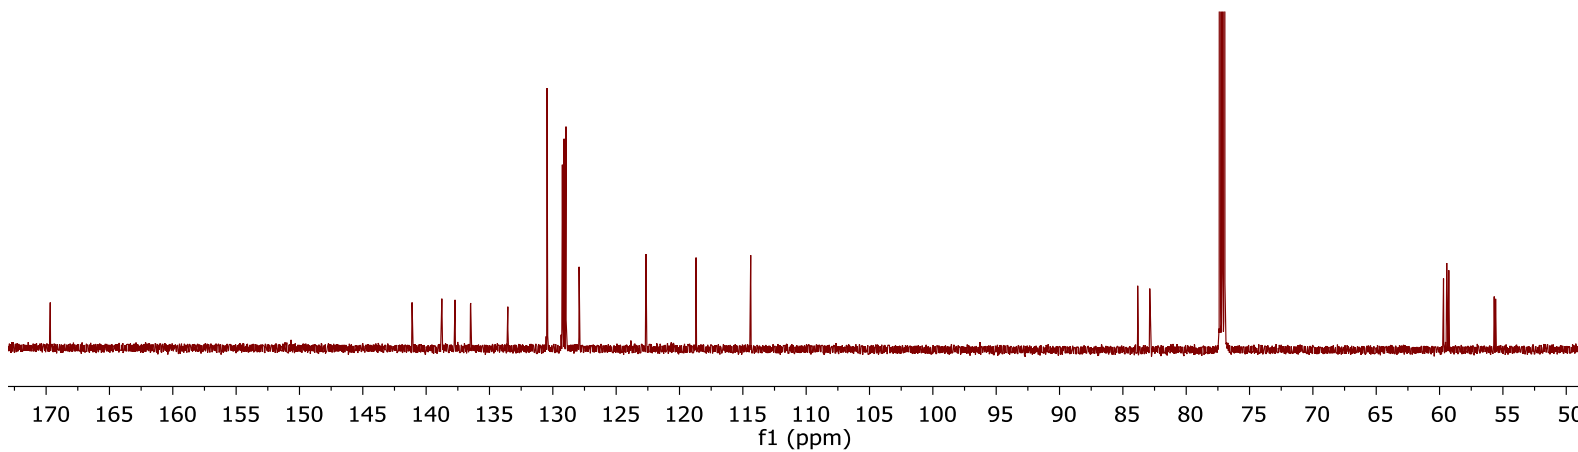

<sup>1</sup>H and <sup>13</sup>C NMR Spectra for S48

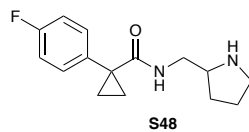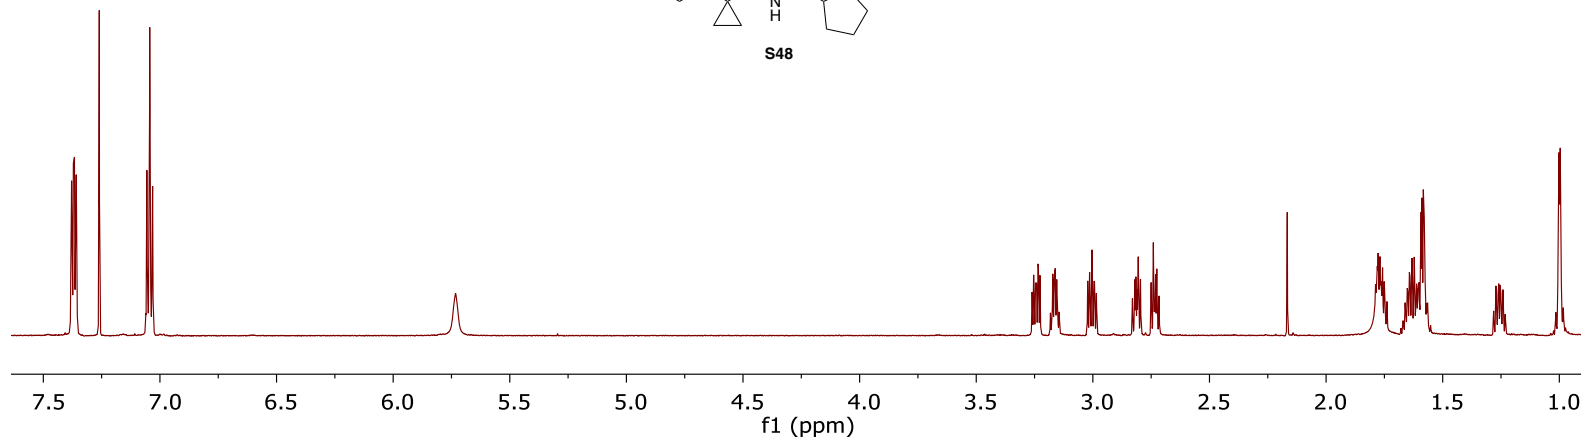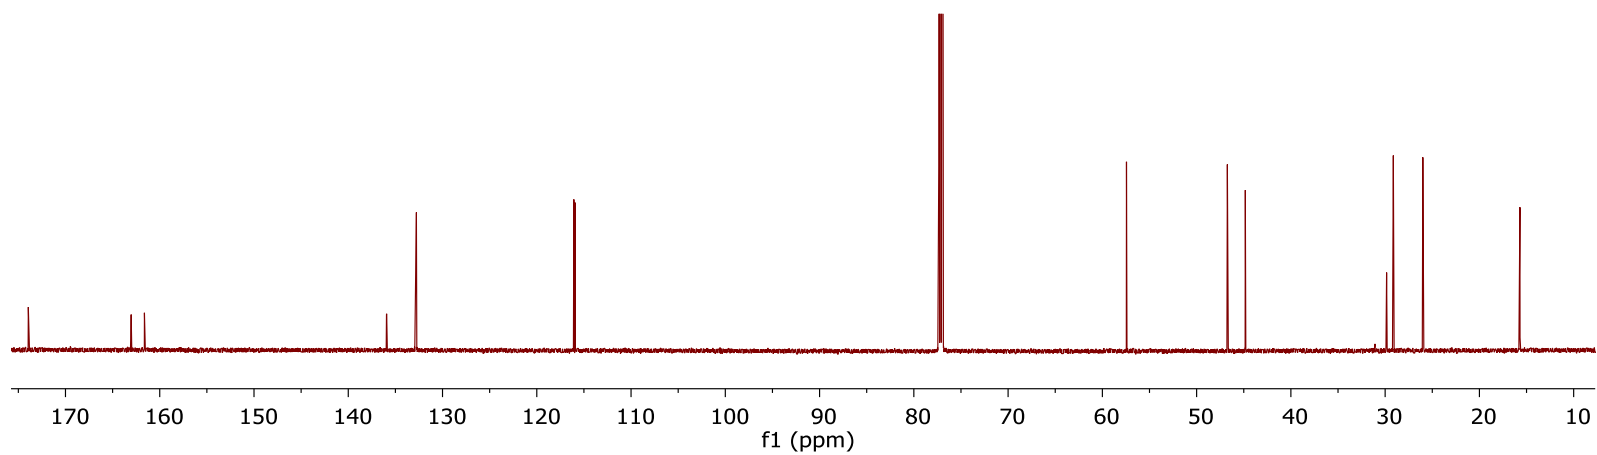

$^1\text{H}$  and  $^{13}\text{C}$  NMR Spectra for **S49**

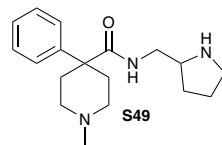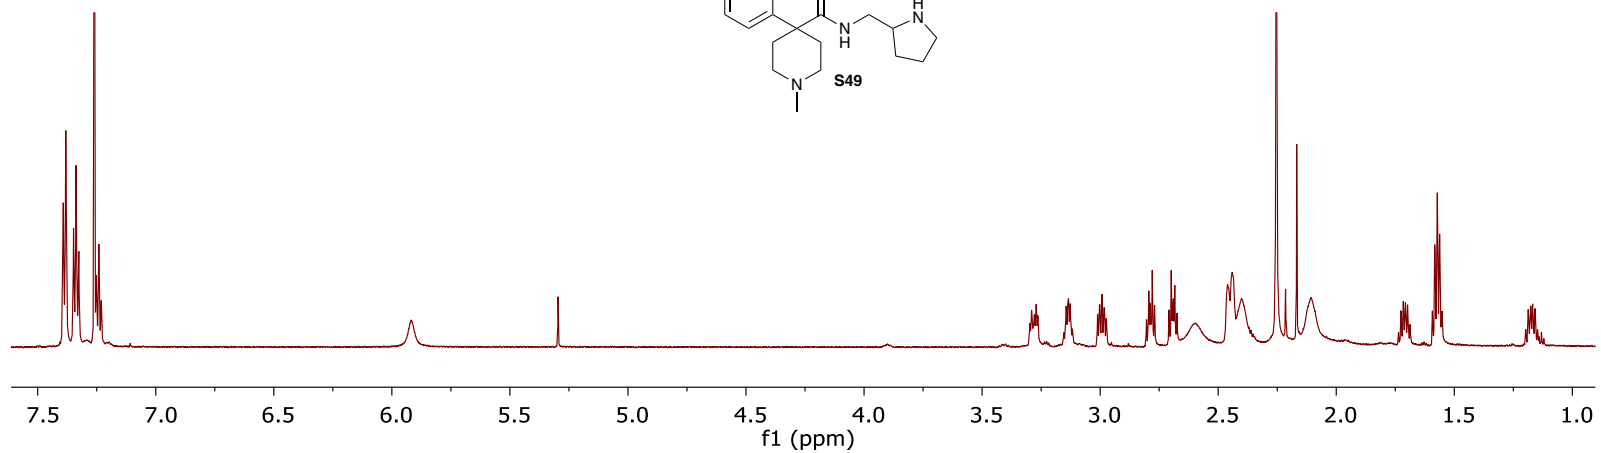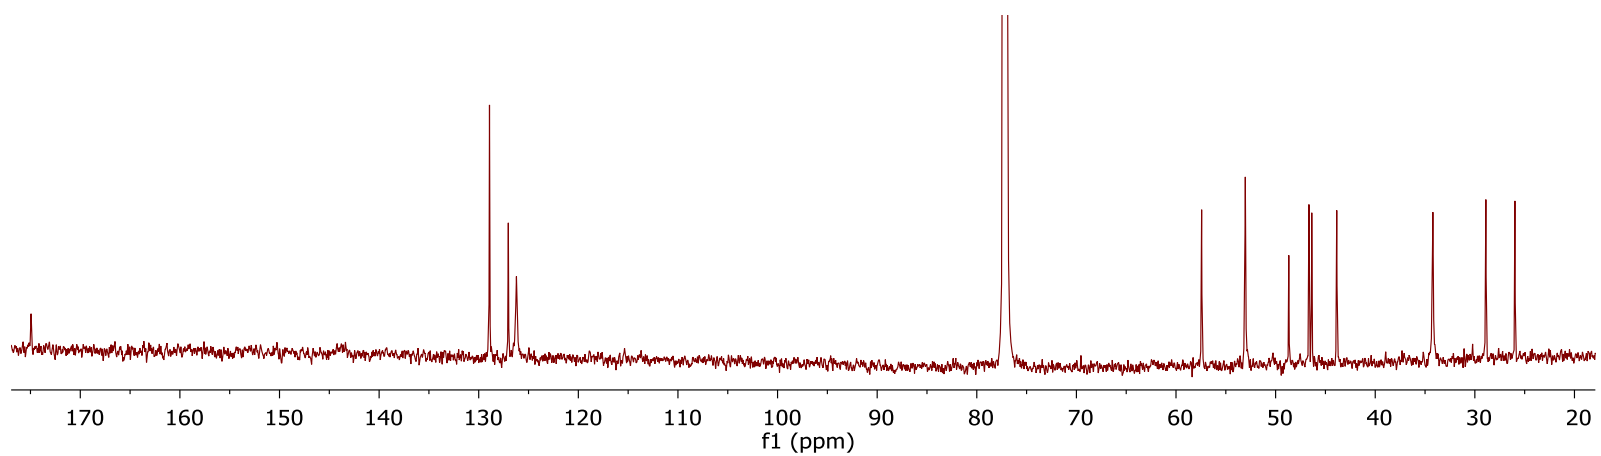



# $^1\text{H}$ and $^{13}\text{C}$ NMR Spectra for S50

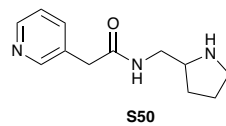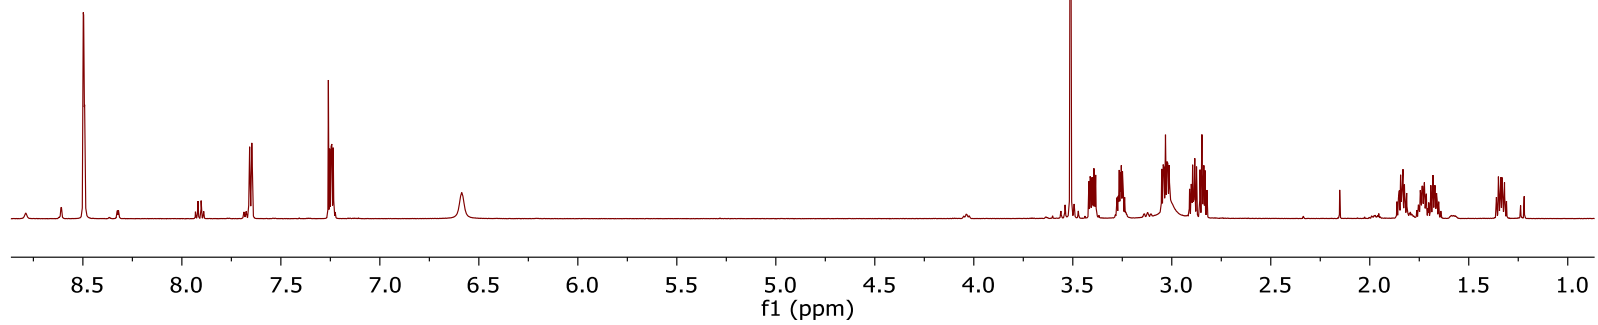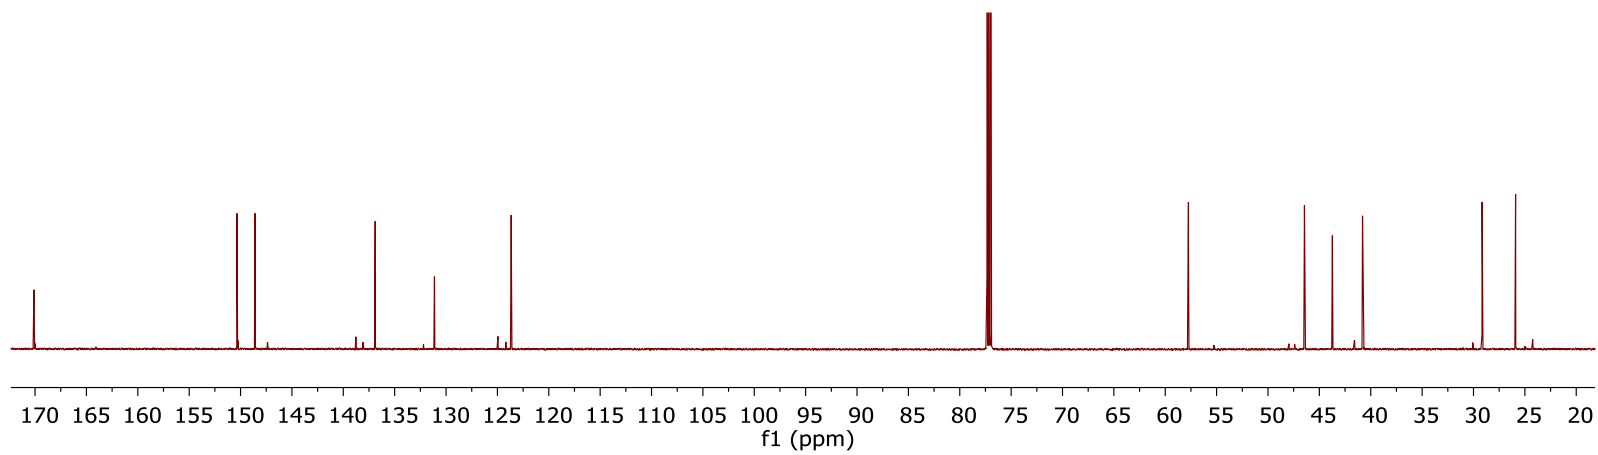

$^1\text{H}$  and  $^{13}\text{C}$  NMR Spectra for **S51**

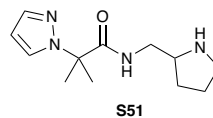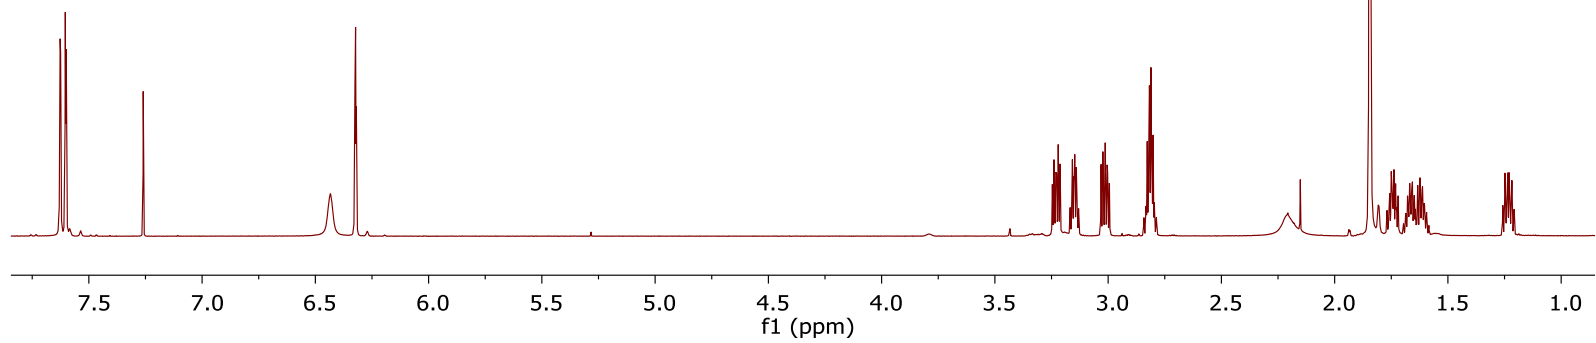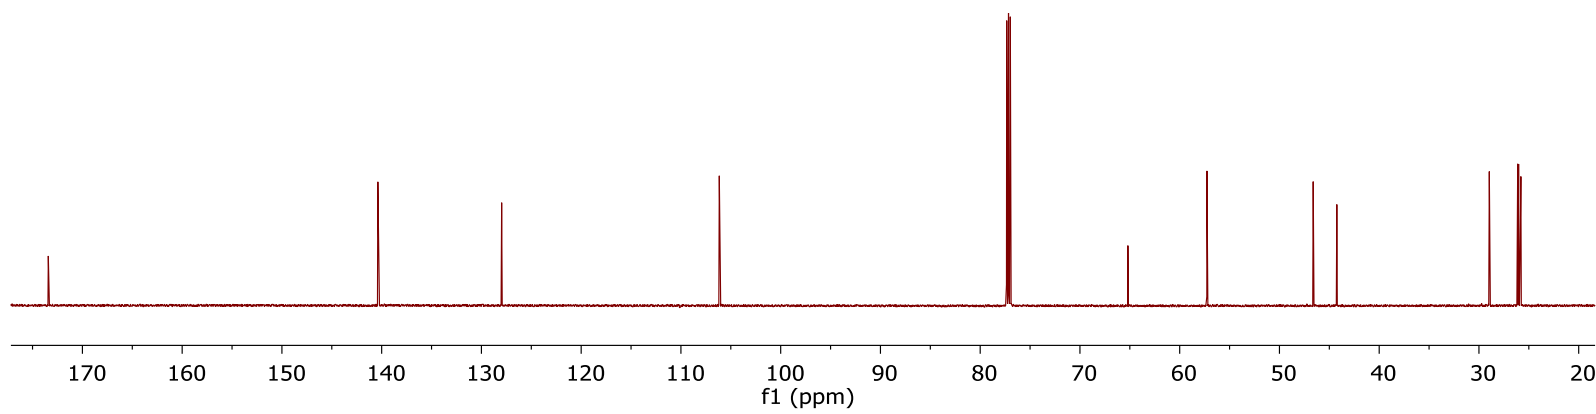

# <sup>1</sup>H and <sup>13</sup>C NMR Spectra for S52

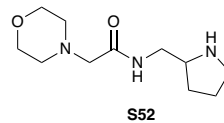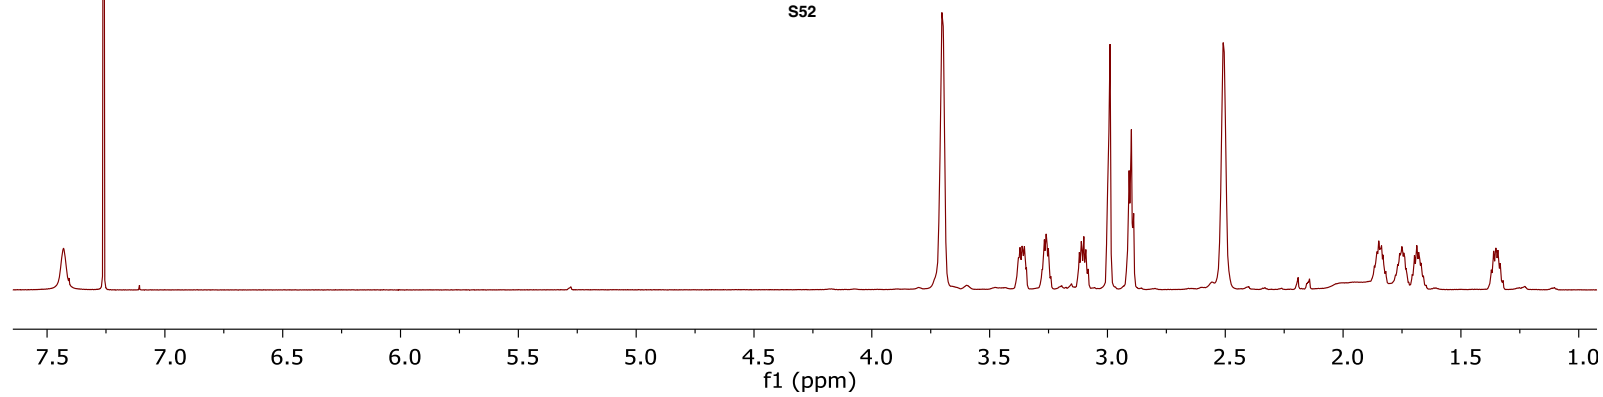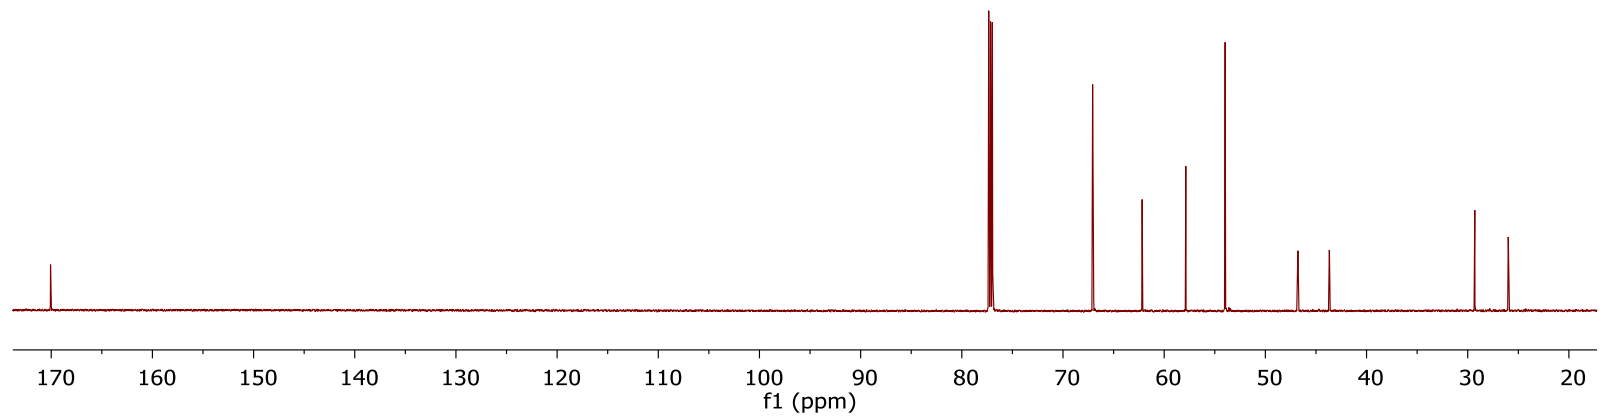

<sup>1</sup>H and <sup>13</sup>C NMR Spectra for S53

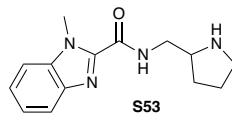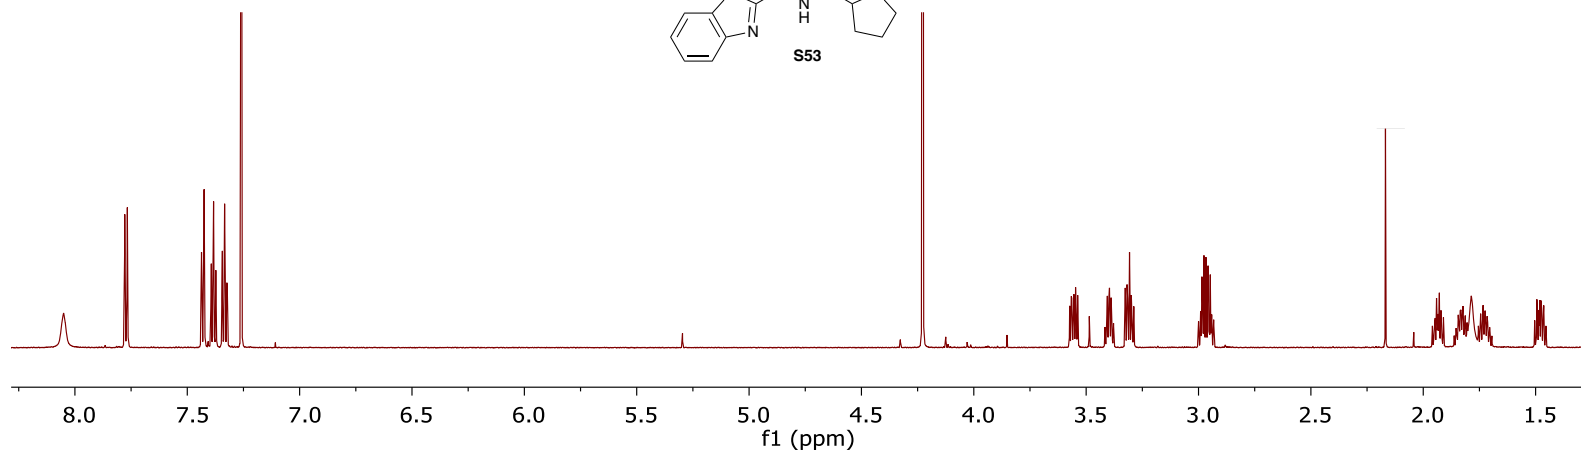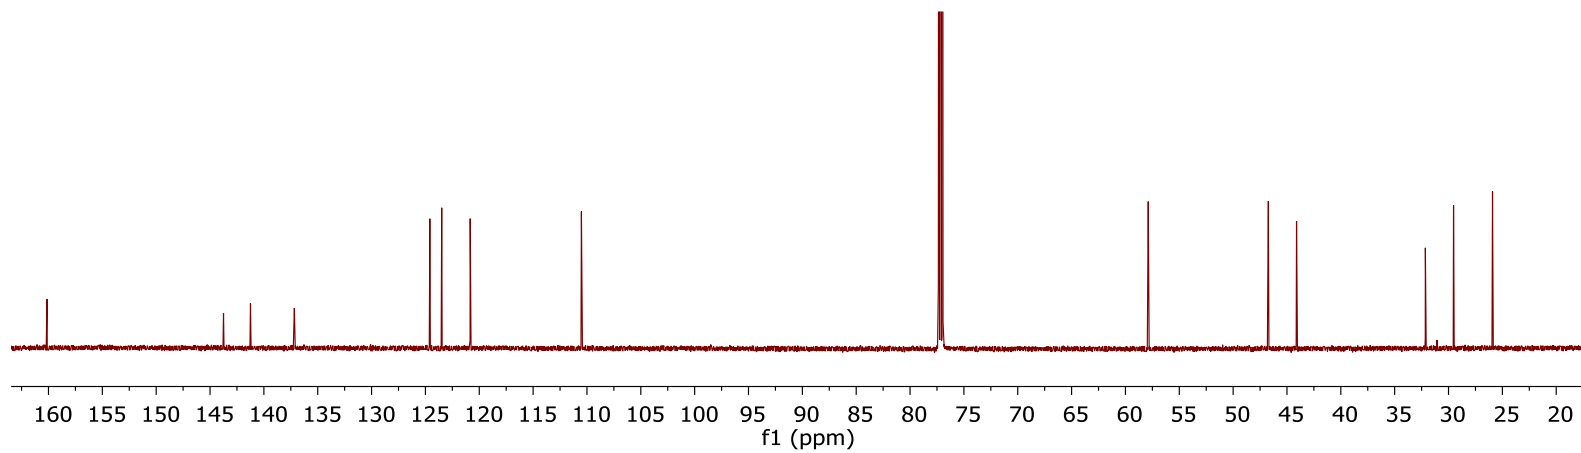

<sup>1</sup>H and <sup>13</sup>C NMR Spectra for S54

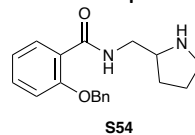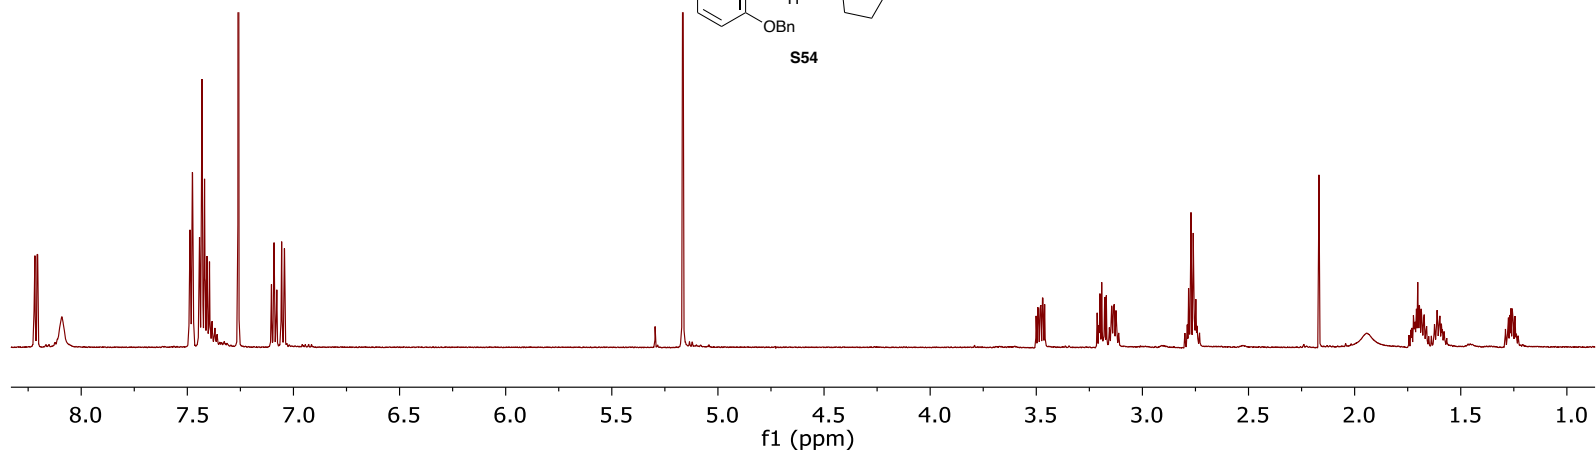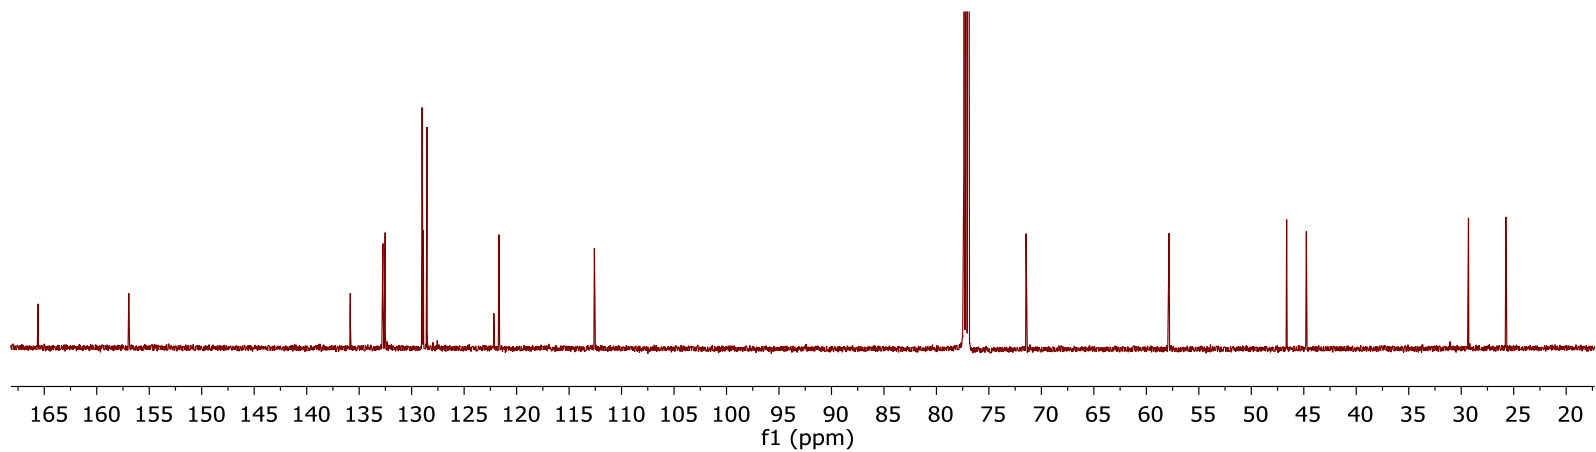

$^1\text{H}$  and  $^{13}\text{C}$  NMR Spectra for S55

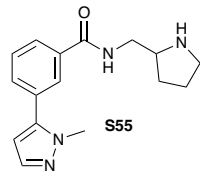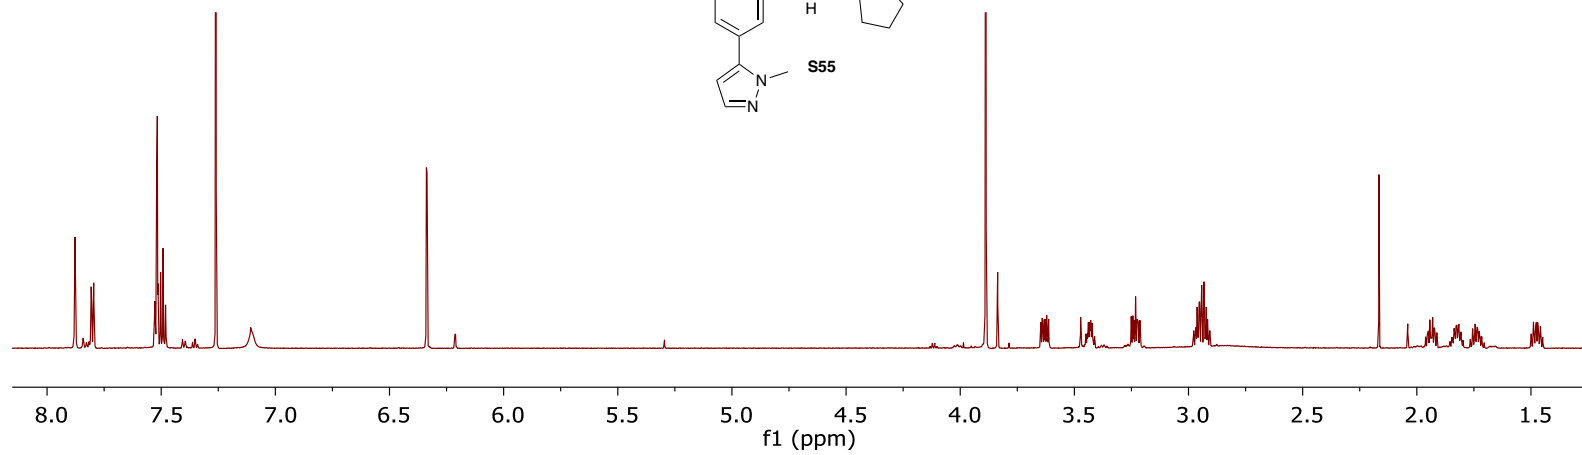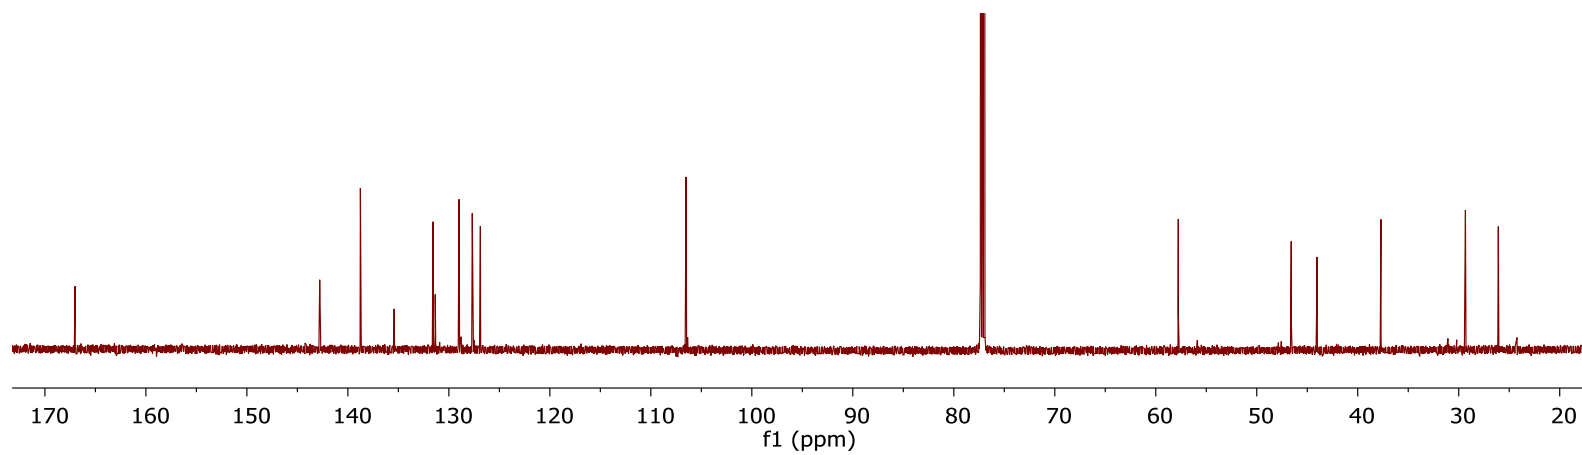

Supplement: d4md01004c1.pdf [file d4md01004c1.pdf]
